# Supplementary material for: Genome-Wide Mining of the Tandem Duplicated Type III Polyketide Synthases and Their Expression, Structure Analysis of Senna tora
Source: MDPI journal article supplement (doi:10.3390/ijms24054837), 2023-03-02
Supplement: s1 [file s1]

### CHS-L2 Ramachandran Plot

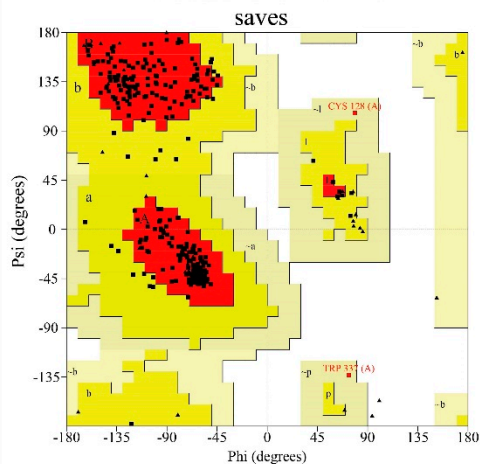

| Plot statistics                                      |     |        |
|------------------------------------------------------|-----|--------|
| Residues in most favoured regions [A,B,L]            | 303 | 92.9%  |
| Residues in additional allowed regions [a,b,I,p]     | 21  | 6.4%   |
| Residues in generously allowed regions [-a,-b,-l,-p] | 2   | 0.6%   |
| Residues in disallowed regions                       | 0   | 0.0%   |
| Number of non-glycine and non-proline residues       | 326 | 100.0% |
| Number of end-residues (excl. Gly and Pro)           | 2   |        |
| Number of glycine residues (shown as triangles)      | 36  |        |
| Number of proline residues                           | 21  |        |
| Total number of residues                             | 385 |        |

Based on an analysis of 118 structures of resolution of at least 2.0 Angstroms and R-factor no greater than 20%, a good quality model would be expected to have over 90% in the most favoured regions.

### CHS-L3 Ramachandran Plot

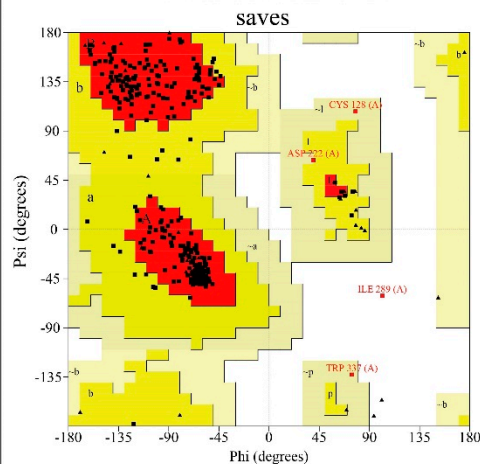

| Plot statistics                                      |     |        |
|------------------------------------------------------|-----|--------|
| Residues in most favoured regions [A,B,L]            | 303 | 92.4%  |
| Residues in additional allowed regions [a,b,I,p]     | 21  | 6.4%   |
| Residues in generously allowed regions [-a,-b,-l,-p] | 3   | 0.9%   |
| Residues in disallowed regions                       | 1   | 0.3%   |
| Number of non-glycine and non-proline residues       | 328 | 100.0% |
| Number of end-residues (excl. Gly and Pro)           | 2   |        |
| Number of glycine residues (shown as triangles)      | 34  |        |
| Number of proline residues                           | 21  |        |
| Total number of residues                             | 385 |        |

Based on an analysis of 118 structures of resolution of at least 2.0 Angstroms and R-factor no greater than 20%, a good quality model would be expected to have over 90% in the most favoured regions.

### CHS-L5 Ramachandran Plot

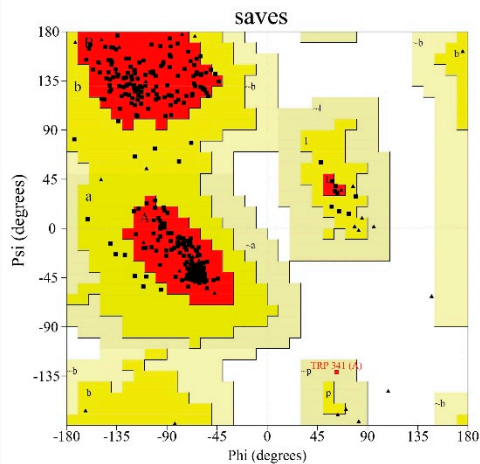

| Plot statistics                                      |     |        |
|------------------------------------------------------|-----|--------|
| Residues in most favoured regions [A,B,L]            | 317 | 94.1%  |
| Residues in additional allowed regions [a,b,I,p]     | 19  | 5.6%   |
| Residues in generously allowed regions [-a,-b,-l,-p] | 1   | 0.3%   |
| Residues in disallowed regions                       | 0   | 0.0%   |
| Number of non-glycine and non-proline residues       | 337 | 100.0% |
| Number of end-residues (excl. Gly and Pro)           | 2   |        |
| Number of glycine residues (shown as triangles)      | 33  |        |
| Number of proline residues                           | 19  |        |
| Total number of residues                             | 391 |        |

Based on an analysis of 118 structures of resolution of at least 2.0 Angstroms and R-factor no greater than 20%, a good quality model would be expected to have over 90% in the most favoured regions.

### CHS-L6 Ramachandran Plot

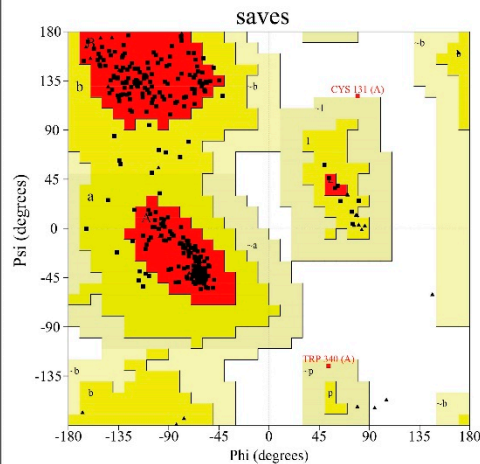

| Plot statistics                                      |     |        |
|------------------------------------------------------|-----|--------|
| Residues in most favoured regions [A,B,L]            | 312 | 92.3%  |
| Residues in additional allowed regions [a,b,I,p]     | 24  | 7.1%   |
| Residues in generously allowed regions [-a,-b,-l,-p] | 1   | 0.3%   |
| Residues in disallowed regions                       | 1   | 0.3%   |
| Number of non-glycine and non-proline residues       | 338 | 100.0% |
| Number of end-residues (excl. Gly and Pro)           | 2   |        |
| Number of glycine residues (shown as triangles)      | 31  |        |
| Number of proline residues                           | 19  |        |
| Total number of residues                             | 390 |        |

Based on an analysis of 118 structures of resolution of at least 2.0 Angstroms and R-factor no greater than 20%, a good quality model would be expected to have over 90% in the most favoured regions.

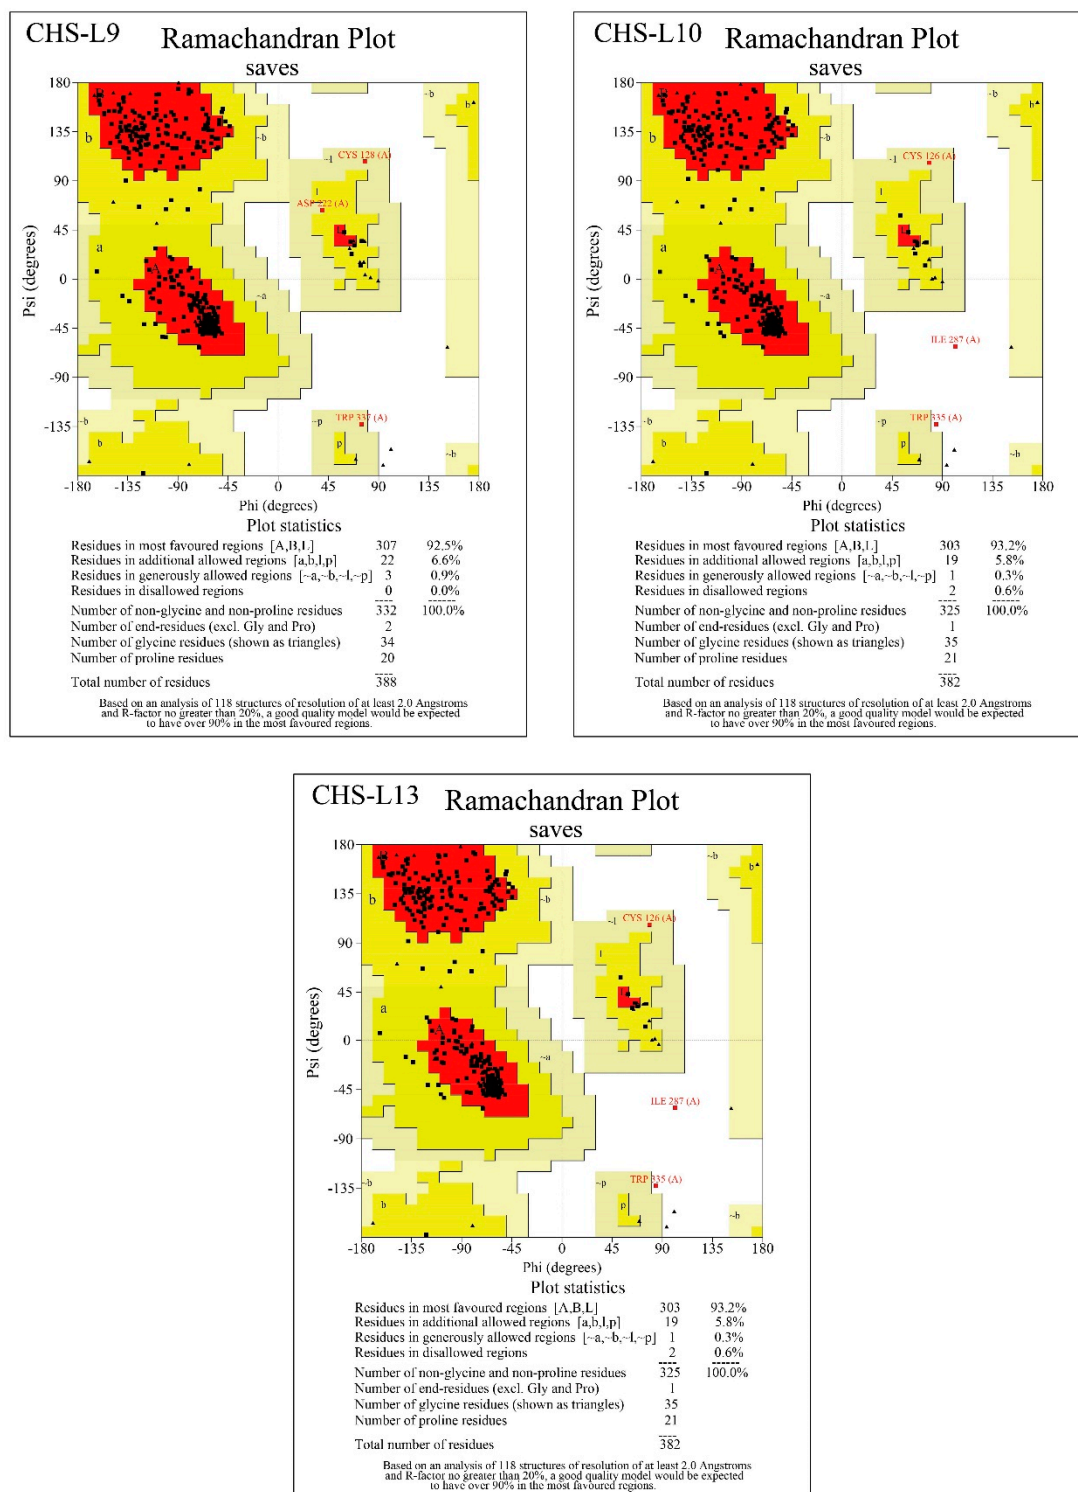

**Figure S1.** Ramachandran plots of the seven predicted CHS-L protein models in *Senna tora*.

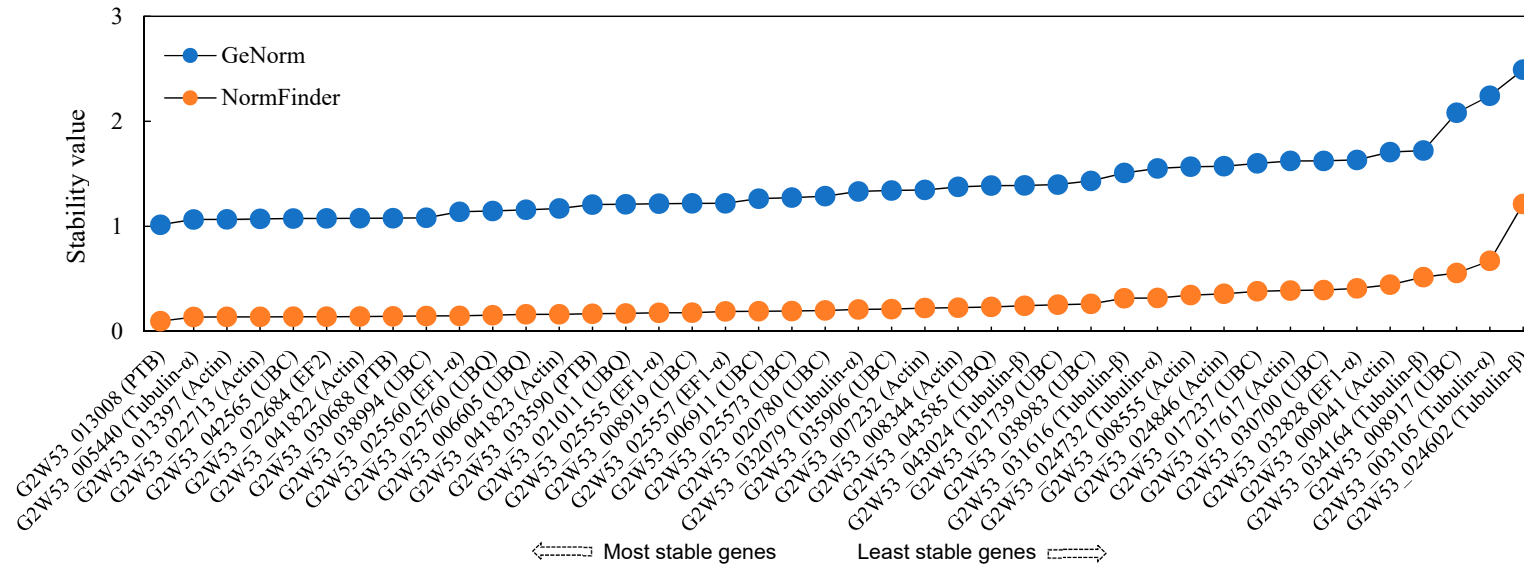

**Figure S2.** Expression stability values of 42 commonly used reference genes at transcriptome levels in *Senna tora*. We used GeNorm (version 3.4) and NormFinder (version 0.953) software to test the expression stability of genes, depending on Log2 transformed expression levels (TPM values). The lower stability value is, the higher stability the reference gene has. Results showed that the G2W53\_013008 (PTB) gene was the most stable one. PTB: Polypyrimidine tract-binding protein-like protein; UBC: Ubiquitin-conjugating enzyme; UBQ: Polyubiquitin; EF2: Elongation factor 2; EF1- $\alpha$ : Elongation factor 1-alpha; TPM: Transcripts per million.
