# Supplementary material for: Genome-Wide Mining of the Tandem Duplicated Type III Polyketide Synthases and Their Expression, Structure Analysis of Senna tora
Source: Int J Mol Sci. 2023 Mar 2;24(5):4837. doi: 10.3390/ijms24054837 (PMC10003783; doi:10.3390/ijms24054837)
Supplement: Supplementary file 1 [file ijms-24-04837-s001.zip › Splementary tables.xlsx]

## Sheet: Supplementary Table S1
Supplementary Table S1. Number of tandem duplication genes (TDGs) in linage group scale of Senna tora genome.
Linkage Group	Length (bp)	Number of TDGs	Average
Chr01	32816166	258	127194
Chr02	42009719	262	160342
Chr03	37860065	185	204649
Chr04	30689712	230	133434
Chr05	52777034	239	220824
Chr06	46512068	252	184572
Chr07	30975534	248	124901
Chr08	49705205	299	166238
Chr09	35860388	325	110340
Chr10	41499577	270	153702
Chr11	30871617	159	194161
Chr12	29799933	150	198666
Chr13	41270226	188	219522
Others	23709733	18	1.31721e+06
Total	526356977	3087	170508
Note: TDGs, tandem duplication genes.

## Sheet: Supplementary Table S2
Supplementary Table S2. Calculation of synonymous substitutions per site of tandem duplication gene pairs.
Gene 1	Gene 2	Ks (synonymous substitutions per site)
G2W53_000017	G2W53_000018	0.318259
G2W53_000046	G2W53_000047	0.0535942
G2W53_000049	G2W53_000050	0.224472
G2W53_000052	G2W53_000053	0.642613
G2W53_000053	G2W53_000054	0.51629
G2W53_000054	G2W53_000055	0.337862
G2W53_000058	G2W53_000059	0.848863
G2W53_000068	G2W53_000069	0.173551
G2W53_000088	G2W53_000089	1.22987
G2W53_000116	G2W53_000117	0.127206
G2W53_000117	G2W53_000118	0.149812
G2W53_000126	G2W53_000127	0.588947
G2W53_000204	G2W53_000205	0.726289
G2W53_000206	G2W53_000207	0.0628091
G2W53_000207	G2W53_000208	1.93948
G2W53_000220	G2W53_000221	0.205114
G2W53_000237	G2W53_000238	0.764036
G2W53_000274	G2W53_000275	1.22302
G2W53_000276	G2W53_000277	0.0926627
G2W53_000330	G2W53_000331	0.635831
G2W53_000331	G2W53_000332	0.764112
G2W53_000334	G2W53_000335	2.18154
G2W53_000335	G2W53_000336	0.0245924
G2W53_000337	G2W53_000338	0.0507106
G2W53_000338	G2W53_000339	0.061725
G2W53_000340	G2W53_000341	0.915175
G2W53_000342	G2W53_000343	0.636533
G2W53_000343	G2W53_000344	0.548133
G2W53_000344	G2W53_000345	0.205276
G2W53_000345	G2W53_000346	0.752526
G2W53_000368	G2W53_000369	1.04468
G2W53_000373	G2W53_000374	0.77302
G2W53_000406	G2W53_000407	0
G2W53_000412	G2W53_000413	0.241687
G2W53_000438	G2W53_000439	0.0306165
G2W53_000441	G2W53_000442	0.51986
G2W53_000442	G2W53_000443	0.322464
G2W53_000452	G2W53_000453	1.09352
G2W53_000459	G2W53_000460	0.550965
G2W53_000460	G2W53_000461	0.568016
G2W53_000461	G2W53_000462	0.799964
G2W53_000499	G2W53_000500	0.275885
G2W53_000538	G2W53_000539	0.145673
G2W53_000559	G2W53_000560	0.251451
G2W53_000560	G2W53_000561	0.345106
G2W53_000561	G2W53_000562	0.601231
G2W53_000562	G2W53_000563	0.366477
G2W53_000563	G2W53_000564	0.333809
G2W53_000567	G2W53_000568	0.282414
G2W53_000576	G2W53_000577	0.0668594
G2W53_000620	G2W53_000621	0.0516761
G2W53_000661	G2W53_000662	0.727776
G2W53_000665	G2W53_000666	0.360973
G2W53_000668	G2W53_000669	0.791107
G2W53_000737	G2W53_000738	0.200159
G2W53_000748	G2W53_000749	0.119729
G2W53_001278	G2W53_001279	0.0334942
G2W53_001359	G2W53_001360	0.40753
G2W53_001403	G2W53_001404	0.554038
G2W53_001560	G2W53_001561	0.315513
G2W53_001613	G2W53_001614	0.249062
G2W53_001614	G2W53_001615	0.251081
G2W53_001615	G2W53_001616	0.250135
G2W53_001629	G2W53_001630	0.186773
G2W53_001632	G2W53_001633	0.342371
G2W53_001642	G2W53_001643	0.631426
G2W53_001663	G2W53_001664	0.259126
G2W53_001664	G2W53_001665	0.489458
G2W53_001668	G2W53_001669	0.215671
G2W53_001671	G2W53_001672	0.266276
G2W53_001676	G2W53_001677	0.195579
G2W53_001682	G2W53_001683	0.244172
G2W53_001693	G2W53_001694	0.662626
G2W53_001709	G2W53_001710	1.28959
G2W53_001715	G2W53_001716	0.0298361
G2W53_001723	G2W53_001724	0.681608
G2W53_001724	G2W53_001725	0.105413
G2W53_001730	G2W53_001731	0.0723801
G2W53_001734	G2W53_001735	0.315365
G2W53_001744	G2W53_001745	0.18676
G2W53_001746	G2W53_001747	0.460084
G2W53_001754	G2W53_001755	0.176155
G2W53_001759	G2W53_001760	0.0895664
G2W53_001770	G2W53_001771	0.0284202
G2W53_001778	G2W53_001779	0.152463
G2W53_001800	G2W53_001801	NaN
G2W53_001806	G2W53_001807	0.120932
G2W53_001828	G2W53_001829	0
G2W53_001839	G2W53_001840	0.0591439
G2W53_001840	G2W53_001841	0.0585663
G2W53_001844	G2W53_001845	0.319832
G2W53_001845	G2W53_001846	0.558348
G2W53_001848	G2W53_001849	0.283519
G2W53_001851	G2W53_001852	0.843609
G2W53_001852	G2W53_001853	1.13643
G2W53_001855	G2W53_001856	0.361781
G2W53_001881	G2W53_001882	0.356928
G2W53_001889	G2W53_001890	0.563505
G2W53_001923	G2W53_001924	0.196294
G2W53_001925	G2W53_001926	0.154904
G2W53_001928	G2W53_001929	1.3633
G2W53_001963	G2W53_001964	0.118528
G2W53_001994	G2W53_001995	0.380247
G2W53_001998	G2W53_001999	0.397707
G2W53_001999	G2W53_002000	0.580856
G2W53_002000	G2W53_002001	0.159138
G2W53_002017	G2W53_002018	0.176767
G2W53_002018	G2W53_002019	0.246398
G2W53_002020	G2W53_002021	0.394271
G2W53_002021	G2W53_002022	0.303345
G2W53_002022	G2W53_002023	0.192554
G2W53_002030	G2W53_002031	0.495981
G2W53_002033	G2W53_002034	0.72197
G2W53_002034	G2W53_002035	1.44545
G2W53_002035	G2W53_002036	0.250975
G2W53_002042	G2W53_002043	1.14756
G2W53_002043	G2W53_002044	0.072491
G2W53_002045	G2W53_002046	0.628979
G2W53_002093	G2W53_002094	0.706269
G2W53_002094	G2W53_002095	1.48064
G2W53_002125	G2W53_002126	0.244831
G2W53_002146	G2W53_002147	1.94386
G2W53_002147	G2W53_002148	0.0872351
G2W53_002167	G2W53_002168	0.968093
G2W53_002176	G2W53_002177	NaN
G2W53_002186	G2W53_002187	NaN
G2W53_002187	G2W53_002188	1.63328
G2W53_002190	G2W53_002191	0.383366
G2W53_002199	G2W53_002200	2.00186
G2W53_002204	G2W53_002205	1.27229
G2W53_002206	G2W53_002207	0.394663
G2W53_002207	G2W53_002208	0.438555
G2W53_002208	G2W53_002209	0.43073
G2W53_002213	G2W53_002214	1.14759
G2W53_002218	G2W53_002219	1.0302
G2W53_002229	G2W53_002230	0.514746
G2W53_002230	G2W53_002231	0.870338
G2W53_002232	G2W53_002233	0.359158
G2W53_002235	G2W53_002236	0.100423
G2W53_002295	G2W53_002296	0.819807
G2W53_002322	G2W53_002323	0.698526
G2W53_002367	G2W53_002368	0.928011
G2W53_002378	G2W53_002379	1.29013
G2W53_002392	G2W53_002393	1.65606
G2W53_002449	G2W53_002450	0.142317
G2W53_002496	G2W53_002497	1.2064
G2W53_002497	G2W53_002498	2.30275
G2W53_002498	G2W53_002499	0.853014
G2W53_002517	G2W53_002518	0.224681
G2W53_002579	G2W53_002580	0.609896
G2W53_002666	G2W53_002667	0.285841
G2W53_002667	G2W53_002668	0.156516
G2W53_002675	G2W53_002676	0.496253
G2W53_002676	G2W53_002677	0.76266
G2W53_002677	G2W53_002678	0.938766
G2W53_002681	G2W53_002682	1.43108
G2W53_002689	G2W53_002690	0.262815
G2W53_002690	G2W53_002691	0.209924
G2W53_002691	G2W53_002692	0.894603
G2W53_002692	G2W53_002693	1.52597
G2W53_002700	G2W53_002701	0.23185
G2W53_002719	G2W53_002720	0.476561
G2W53_002720	G2W53_002721	0.424468
G2W53_002721	G2W53_002722	0.396792
G2W53_002733	G2W53_002734	0.209566
G2W53_002735	G2W53_002736	0.240425
G2W53_002736	G2W53_002737	0.353313
G2W53_002737	G2W53_002738	0.364992
G2W53_002742	G2W53_002743	0
G2W53_002782	G2W53_002783	0.0355622
G2W53_002788	G2W53_002789	0
G2W53_002794	G2W53_002795	0.0375078
G2W53_002827	G2W53_002828	0.280751
G2W53_002828	G2W53_002829	0.551465
G2W53_002839	G2W53_002840	0.260397
G2W53_002881	G2W53_002882	0.197207
G2W53_002899	G2W53_002900	3.91202
G2W53_002905	G2W53_002906	0.03333
G2W53_002947	G2W53_002948	0.356911
G2W53_002949	G2W53_002950	0.584506
G2W53_002950	G2W53_002951	1.08876
G2W53_002957	G2W53_002958	0.219291
G2W53_002977	G2W53_002978	0.172384
G2W53_002981	G2W53_002982	0.086863
G2W53_002982	G2W53_002983	0.187143
G2W53_002989	G2W53_002990	1.75064
G2W53_002991	G2W53_002992	0.782561
G2W53_002992	G2W53_002993	1.20708
G2W53_002993	G2W53_002994	1.21887
G2W53_002994	G2W53_002995	1.25441
G2W53_002995	G2W53_002996	0.317657
G2W53_003000	G2W53_003001	0.157849
G2W53_003087	G2W53_003088	0.313271
G2W53_003089	G2W53_003090	0.160303
G2W53_003090	G2W53_003091	0.0819592
G2W53_003091	G2W53_003092	0.101678
G2W53_003092	G2W53_003093	0.380304
G2W53_003093	G2W53_003094	0.346252
G2W53_003094	G2W53_003095	0.239986
G2W53_003107	G2W53_003108	0.473036
G2W53_003108	G2W53_003109	0.388673
G2W53_003109	G2W53_003110	0.103137
G2W53_003114	G2W53_003115	0.56509
G2W53_003123	G2W53_003124	0.0988172
G2W53_003124	G2W53_003125	0.208884
G2W53_003125	G2W53_003126	0.0423701
G2W53_003140	G2W53_003141	0.107729
G2W53_003203	G2W53_003204	0.0416774
G2W53_003204	G2W53_003205	0.580369
G2W53_003225	G2W53_003226	0.505598
G2W53_003274	G2W53_003275	0.10038
G2W53_003281	G2W53_003282	NaN
G2W53_003337	G2W53_003338	0.586834
G2W53_003342	G2W53_003343	0.206559
G2W53_003343	G2W53_003344	0.188184
G2W53_003356	G2W53_003357	0
G2W53_003362	G2W53_003363	0.0317088
G2W53_003364	G2W53_003365	0.121306
G2W53_003370	G2W53_003371	0.524644
G2W53_003372	G2W53_003373	0.0966677
G2W53_003380	G2W53_003381	0.422057
G2W53_003389	G2W53_003390	0.0782468
G2W53_003391	G2W53_003392	0.208954
G2W53_003403	G2W53_003404	0.0835355
G2W53_003404	G2W53_003405	0.295452
G2W53_003418	G2W53_003419	0.0717803
G2W53_003502	G2W53_003503	0.458234
G2W53_003725	G2W53_003726	0.291171
G2W53_003810	G2W53_003811	0.111574
G2W53_003866	G2W53_003867	1.05043
G2W53_004046	G2W53_004047	0.0721035
G2W53_004076	G2W53_004077	0.284335
G2W53_004220	G2W53_004221	0.418641
G2W53_004326	G2W53_004327	0.087691
G2W53_004379	G2W53_004380	0.18202
G2W53_004418	G2W53_004419	0.259177
G2W53_004419	G2W53_004420	0.127628
G2W53_004483	G2W53_004484	0.209094
G2W53_004507	G2W53_004508	0.995153
G2W53_004515	G2W53_004516	NaN
G2W53_004526	G2W53_004527	0.052195
G2W53_004527	G2W53_004528	0.409517
G2W53_004528	G2W53_004529	0.224547
G2W53_004535	G2W53_004536	0.00897319
G2W53_004577	G2W53_004578	0.545815
G2W53_004585	G2W53_004586	0.11029
G2W53_004596	G2W53_004597	0.266469
G2W53_004611	G2W53_004612	0.375694
G2W53_004684	G2W53_004685	0.53823
G2W53_004700	G2W53_004701	0.136855
G2W53_004705	G2W53_004706	0.0749175
G2W53_004708	G2W53_004709	0.0131294
G2W53_004709	G2W53_004710	0.130327
G2W53_004868	G2W53_004869	0.177914
G2W53_004869	G2W53_004870	0.151625
G2W53_004872	G2W53_004873	0.330844
G2W53_004873	G2W53_004874	0.122743
G2W53_004902	G2W53_004903	0.517967
G2W53_004945	G2W53_004946	0.0960458
G2W53_004953	G2W53_004954	0.178711
G2W53_004955	G2W53_004956	0.0901593
G2W53_004956	G2W53_004957	0.056973
G2W53_004959	G2W53_004960	0.044656
G2W53_004985	G2W53_004986	0.882206
G2W53_004994	G2W53_004995	0.365372
G2W53_005003	G2W53_005004	0.0753059
G2W53_005012	G2W53_005013	0.203192
G2W53_005018	G2W53_005019	0.0960233
G2W53_005045	G2W53_005046	0.0972848
G2W53_005046	G2W53_005047	0.0916382
G2W53_005059	G2W53_005060	0.275835
G2W53_005066	G2W53_005067	1.02712
G2W53_005104	G2W53_005105	0.448606
G2W53_005107	G2W53_005108	1.14442
G2W53_005111	G2W53_005112	1.10016
G2W53_005138	G2W53_005139	0.528843
G2W53_005141	G2W53_005142	0.308968
G2W53_005151	G2W53_005152	0.22936
G2W53_005156	G2W53_005157	0.146808
G2W53_005162	G2W53_005163	0.286388
G2W53_005163	G2W53_005164	0.598063
G2W53_005166	G2W53_005167	0.140671
G2W53_005167	G2W53_005168	0.167531
G2W53_005178	G2W53_005179	0.839842
G2W53_005179	G2W53_005180	0.96594
G2W53_005184	G2W53_005185	0.0876793
G2W53_005200	G2W53_005201	0.227613
G2W53_005209	G2W53_005210	1.10122
G2W53_005219	G2W53_005220	0.196004
G2W53_005281	G2W53_005282	1.23624
G2W53_005282	G2W53_005283	1.68641
G2W53_005290	G2W53_005291	0.309929
G2W53_005296	G2W53_005297	0.185169
G2W53_005297	G2W53_005298	0.397597
G2W53_005298	G2W53_005299	0.239417
G2W53_005317	G2W53_005318	1.13795
G2W53_005333	G2W53_005334	1.31285
G2W53_005334	G2W53_005335	1.01353
G2W53_005335	G2W53_005336	0.340948
G2W53_005336	G2W53_005337	0.261989
G2W53_005337	G2W53_005338	0.408875
G2W53_005338	G2W53_005339	1.61161
G2W53_005344	G2W53_005345	0.971725
G2W53_005374	G2W53_005375	1.56617
G2W53_005463	G2W53_005464	0.275926
G2W53_005494	G2W53_005495	0.182858
G2W53_005496	G2W53_005497	0.397669
G2W53_005512	G2W53_005513	0.229606
G2W53_005513	G2W53_005514	0.13694
G2W53_005514	G2W53_005515	0.135707
G2W53_005515	G2W53_005516	0.78035
G2W53_005516	G2W53_005517	1.42645
G2W53_005520	G2W53_005521	0.165404
G2W53_005535	G2W53_005536	0.328237
G2W53_005596	G2W53_005597	0.0495428
G2W53_005600	G2W53_005601	0.0515054
G2W53_005601	G2W53_005602	0.593882
G2W53_005611	G2W53_005612	0.339548
G2W53_005616	G2W53_005617	0.89343
G2W53_005666	G2W53_005667	0.084666
G2W53_005674	G2W53_005675	0.364088
G2W53_005689	G2W53_005690	1.46262
G2W53_005704	G2W53_005705	0.570697
G2W53_005717	G2W53_005718	0.656267
G2W53_005721	G2W53_005722	0.510763
G2W53_005743	G2W53_005744	1.22968
G2W53_005754	G2W53_005755	NaN
G2W53_005762	G2W53_005763	1.32276
G2W53_005818	G2W53_005819	1.12823
G2W53_005823	G2W53_005824	0.363576
G2W53_005824	G2W53_005825	0.482844
G2W53_005836	G2W53_005837	0.141279
G2W53_005837	G2W53_005838	0
G2W53_005838	G2W53_005839	0.0365283
G2W53_005845	G2W53_005846	2.37194
G2W53_005880	G2W53_005881	1.64683
G2W53_005961	G2W53_005962	0.891246
G2W53_005966	G2W53_005967	0.908615
G2W53_005997	G2W53_005998	0.227379
G2W53_006042	G2W53_006043	0.450005
G2W53_006048	G2W53_006049	2.2252
G2W53_006052	G2W53_006053	0
G2W53_006173	G2W53_006174	0.293265
G2W53_006174	G2W53_006175	0.411956
G2W53_006255	G2W53_006256	NaN
G2W53_006277	G2W53_006278	0.600188
G2W53_006299	G2W53_006300	0.100316
G2W53_006325	G2W53_006326	0.680334
G2W53_006342	G2W53_006343	1.13908
G2W53_006377	G2W53_006378	2.06349
G2W53_006382	G2W53_006383	0
G2W53_006392	G2W53_006393	1.22469
G2W53_006489	G2W53_006490	0.256965
G2W53_006578	G2W53_006579	0.261635
G2W53_006596	G2W53_006597	0.0863505
G2W53_006608	G2W53_006609	1.37968
G2W53_006685	G2W53_006686	0.189406
G2W53_006714	G2W53_006715	0.300195
G2W53_006718	G2W53_006719	0.970218
G2W53_006719	G2W53_006720	0.473968
G2W53_006722	G2W53_006723	0.974662
G2W53_006727	G2W53_006728	0.26214
G2W53_006730	G2W53_006731	0.52838
G2W53_006735	G2W53_006736	0.315213
G2W53_006739	G2W53_006740	0.689233
G2W53_006740	G2W53_006741	0.367923
G2W53_006741	G2W53_006742	0.294686
G2W53_006745	G2W53_006746	0.207542
G2W53_006746	G2W53_006747	0.467787
G2W53_006749	G2W53_006750	0.124784
G2W53_006750	G2W53_006751	0.294342
G2W53_006918	G2W53_006919	0.0355383
G2W53_006922	G2W53_006923	0.190901
G2W53_007027	G2W53_007028	0.0487107
G2W53_007081	G2W53_007082	0.11556
G2W53_007082	G2W53_007083	0.0648527
G2W53_007185	G2W53_007186	0.117487
G2W53_007339	G2W53_007340	0.265909
G2W53_007353	G2W53_007354	0.29358
G2W53_007369	G2W53_007370	0.0097404
G2W53_007430	G2W53_007431	0.0260142
G2W53_007431	G2W53_007432	0.0230455
G2W53_007574	G2W53_007575	0.3067
G2W53_007613	G2W53_007614	0.178885
G2W53_007653	G2W53_007654	0.294641
G2W53_007662	G2W53_007663	0.116513
G2W53_007666	G2W53_007667	0.0537543
G2W53_007677	G2W53_007678	0
G2W53_007805	G2W53_007806	0.123737
G2W53_007974	G2W53_007975	0.262095
G2W53_008007	G2W53_008008	0.480467
G2W53_008008	G2W53_008009	0
G2W53_008009	G2W53_008010	0.152545
G2W53_008050	G2W53_008051	0.101189
G2W53_008062	G2W53_008063	0.0614204
G2W53_008067	G2W53_008068	0.069328
G2W53_008119	G2W53_008120	1.27471
G2W53_008194	G2W53_008195	0.106255
G2W53_008279	G2W53_008280	0.100223
G2W53_008364	G2W53_008365	0.170717
G2W53_008387	G2W53_008388	0
G2W53_008444	G2W53_008445	0.812707
G2W53_008445	G2W53_008446	0.185825
G2W53_008584	G2W53_008585	0.451107
G2W53_008661	G2W53_008662	0.078503
G2W53_008670	G2W53_008671	0.187336
G2W53_008750	G2W53_008751	0.0387183
G2W53_008804	G2W53_008805	0.918779
G2W53_008817	G2W53_008818	0.268108
G2W53_008820	G2W53_008821	0.261763
G2W53_008821	G2W53_008822	0.176102
G2W53_008828	G2W53_008829	0.547652
G2W53_008829	G2W53_008830	0.406023
G2W53_008859	G2W53_008860	1.48341
G2W53_008874	G2W53_008875	1.17739
G2W53_008878	G2W53_008879	0.362449
G2W53_008882	G2W53_008883	0.0698992
G2W53_008884	G2W53_008885	1.06639
G2W53_008924	G2W53_008925	NaN
G2W53_008930	G2W53_008931	0.201859
G2W53_009132	G2W53_009133	0.569572
G2W53_009133	G2W53_009134	0.302213
G2W53_009140	G2W53_009141	0.912005
G2W53_009160	G2W53_009161	0.155026
G2W53_009267	G2W53_009268	0
G2W53_009371	G2W53_009372	0.128635
G2W53_009641	G2W53_009642	0.0139247
G2W53_009642	G2W53_009643	0.00137995
G2W53_009643	G2W53_009644	0.0026732
G2W53_009644	G2W53_009645	0.061351
G2W53_009652	G2W53_009653	0.676373
G2W53_009656	G2W53_009657	0.0618908
G2W53_009658	G2W53_009659	0.17396
G2W53_009707	G2W53_009708	0.0458795
G2W53_009752	G2W53_009753	0.100437
G2W53_009794	G2W53_009795	0.109138
G2W53_009841	G2W53_009842	0.131904
G2W53_009853	G2W53_009854	0.0858377
G2W53_009885	G2W53_009886	0.121683
G2W53_009891	G2W53_009892	0.101334
G2W53_009892	G2W53_009893	0.123143
G2W53_009894	G2W53_009895	0.219389
G2W53_009904	G2W53_009905	0.350781
G2W53_009907	G2W53_009908	0.0142016
G2W53_009908	G2W53_009909	0.213285
G2W53_009919	G2W53_009920	0.102549
G2W53_009947	G2W53_009948	0.314383
G2W53_009949	G2W53_009950	0
G2W53_009961	G2W53_009962	0.292277
G2W53_009962	G2W53_009963	0.125037
G2W53_010016	G2W53_010017	0.191738
G2W53_010020	G2W53_010021	0.166628
G2W53_010033	G2W53_010034	0.0747506
G2W53_010044	G2W53_010045	0.116174
G2W53_010060	G2W53_010061	0.523601
G2W53_010213	G2W53_010214	0.200353
G2W53_010214	G2W53_010215	0.44682
G2W53_010325	G2W53_010326	0.0409658
G2W53_010333	G2W53_010334	0.159539
G2W53_010341	G2W53_010342	0.140487
G2W53_010355	G2W53_010356	0.121068
G2W53_010371	G2W53_010372	0.0640769
G2W53_010372	G2W53_010373	0.158482
G2W53_010395	G2W53_010396	0.0873714
G2W53_010636	G2W53_010637	0.292533
G2W53_010709	G2W53_010710	0.120499
G2W53_010759	G2W53_010760	0.187639
G2W53_010760	G2W53_010761	0.666793
G2W53_010769	G2W53_010770	0.141745
G2W53_010786	G2W53_010787	0.215762
G2W53_010797	G2W53_010798	0.0699894
G2W53_010850	G2W53_010851	0.258759
G2W53_010851	G2W53_010852	0.339997
G2W53_010949	G2W53_010950	0.083733
G2W53_010951	G2W53_010952	0.208459
G2W53_010957	G2W53_010958	0.258059
G2W53_010965	G2W53_010966	0.217461
G2W53_010966	G2W53_010967	0.337123
G2W53_010967	G2W53_010968	0.327244
G2W53_011002	G2W53_011003	0.0485285
G2W53_011003	G2W53_011004	0.00428114
G2W53_011004	G2W53_011005	0.0347762
G2W53_011005	G2W53_011006	0.141788
G2W53_011009	G2W53_011010	0
G2W53_011011	G2W53_011012	0.0570346
G2W53_011013	G2W53_011014	0.226864
G2W53_011015	G2W53_011016	0.249178
G2W53_011019	G2W53_011020	0.282672
G2W53_011031	G2W53_011032	0.639749
G2W53_011071	G2W53_011072	1.26871
G2W53_011084	G2W53_011085	0.326819
G2W53_011093	G2W53_011094	0.238595
G2W53_011096	G2W53_011097	0.442367
G2W53_011097	G2W53_011098	0.445525
G2W53_011098	G2W53_011099	0.566941
G2W53_011099	G2W53_011100	0.12279
G2W53_011104	G2W53_011105	0.231151
G2W53_011105	G2W53_011106	0.378765
G2W53_011130	G2W53_011131	0.277625
G2W53_011131	G2W53_011132	0.561047
G2W53_011132	G2W53_011133	0.250717
G2W53_011133	G2W53_011134	0.0331546
G2W53_011199	G2W53_011200	0.617212
G2W53_011205	G2W53_011206	0.545924
G2W53_011223	G2W53_011224	1.18343
G2W53_011232	G2W53_011233	0.422399
G2W53_011250	G2W53_011251	0.318984
G2W53_011257	G2W53_011258	0.546039
G2W53_011258	G2W53_011259	0.226303
G2W53_011259	G2W53_011260	0.199634
G2W53_011260	G2W53_011261	0.44182
G2W53_011261	G2W53_011262	0.408914
G2W53_011262	G2W53_011263	0.495168
G2W53_011264	G2W53_011265	0.628128
G2W53_011265	G2W53_011266	0.524533
G2W53_011268	G2W53_011269	0.546728
G2W53_011272	G2W53_011273	0.641907
G2W53_011310	G2W53_011311	0.0370446
G2W53_011320	G2W53_011321	0.506428
G2W53_011334	G2W53_011335	2.69798
G2W53_011336	G2W53_011337	0.405549
G2W53_011337	G2W53_011338	0.434254
G2W53_011356	G2W53_011357	0.140995
G2W53_011365	G2W53_011366	0.386903
G2W53_011367	G2W53_011368	0.107159
G2W53_011387	G2W53_011388	0.618785
G2W53_011396	G2W53_011397	0.139409
G2W53_011437	G2W53_011438	0.0296335
G2W53_011449	G2W53_011450	0.377138
G2W53_011451	G2W53_011452	0.764815
G2W53_011464	G2W53_011465	1.8346
G2W53_011478	G2W53_011479	2.32765
G2W53_011481	G2W53_011482	1.81422
G2W53_011545	G2W53_011546	0.205324
G2W53_011569	G2W53_011570	0.0454685
G2W53_011578	G2W53_011579	0.596582
G2W53_011639	G2W53_011640	0.548688
G2W53_011933	G2W53_011934	1.27511
G2W53_011979	G2W53_011980	0.282297
G2W53_011980	G2W53_011981	0.320966
G2W53_012050	G2W53_012051	0.623367
G2W53_012089	G2W53_012090	0.695344
G2W53_012114	G2W53_012115	0.498605
G2W53_012140	G2W53_012141	0.658045
G2W53_012141	G2W53_012142	0.326165
G2W53_012143	G2W53_012144	0
G2W53_012221	G2W53_012222	0.396503
G2W53_012229	G2W53_012230	1.18511
G2W53_012243	G2W53_012244	2.12982
G2W53_012305	G2W53_012306	2.62238
G2W53_012315	G2W53_012316	0.0151329
G2W53_012348	G2W53_012349	0.174714
G2W53_012410	G2W53_012411	NaN
G2W53_012464	G2W53_012465	0.373283
G2W53_012607	G2W53_012608	0.233038
G2W53_012652	G2W53_012653	3.27006
G2W53_012683	G2W53_012684	1.74268
G2W53_012701	G2W53_012702	1.15854
G2W53_012702	G2W53_012703	0.205034
G2W53_012719	G2W53_012720	0.332139
G2W53_012720	G2W53_012721	0.681933
G2W53_012721	G2W53_012722	1.60021
G2W53_012734	G2W53_012735	0.308282
G2W53_012769	G2W53_012770	0.256676
G2W53_012822	G2W53_012823	1.53919
G2W53_012861	G2W53_012862	0.388187
G2W53_012917	G2W53_012918	1.88612
G2W53_012918	G2W53_012919	2.02227
G2W53_012965	G2W53_012966	1.37095
G2W53_012966	G2W53_012967	0.586931
G2W53_012967	G2W53_012968	1.0573
G2W53_012999	G2W53_013000	0.16777
G2W53_013052	G2W53_013053	3.43851
G2W53_013080	G2W53_013081	NaN
G2W53_013090	G2W53_013091	0.176828
G2W53_013099	G2W53_013100	0.446804
G2W53_013100	G2W53_013101	1.40222
G2W53_013104	G2W53_013105	0.509887
G2W53_013165	G2W53_013166	0.937968
G2W53_013166	G2W53_013167	0.468756
G2W53_013167	G2W53_013168	0.794968
G2W53_013168	G2W53_013169	0.468613
G2W53_013169	G2W53_013170	0.767359
G2W53_013170	G2W53_013171	0.85429
G2W53_013171	G2W53_013172	0.916684
G2W53_013172	G2W53_013173	1.21075
G2W53_013225	G2W53_013226	0.446163
G2W53_013262	G2W53_013263	0.0442389
G2W53_013280	G2W53_013281	0.718009
G2W53_013294	G2W53_013295	0.372187
G2W53_013337	G2W53_013338	0.280206
G2W53_013339	G2W53_013340	1.79437
G2W53_013340	G2W53_013341	0.62732
G2W53_013341	G2W53_013342	1.62335
G2W53_013351	G2W53_013352	0.0593268
G2W53_013352	G2W53_013353	0.0837851
G2W53_013376	G2W53_013377	0.576303
G2W53_013416	G2W53_013417	0.475474
G2W53_013481	G2W53_013482	0.108441
G2W53_013493	G2W53_013494	0.372108
G2W53_013494	G2W53_013495	0.228016
G2W53_013728	G2W53_013729	0.396369
G2W53_013750	G2W53_013751	0.0358214
G2W53_013784	G2W53_013785	0.0627044
G2W53_013808	G2W53_013809	0.180237
G2W53_013856	G2W53_013857	0.226366
G2W53_013857	G2W53_013858	0.146706
G2W53_013862	G2W53_013863	0.0730949
G2W53_013946	G2W53_013947	0
G2W53_014041	G2W53_014042	0.483105
G2W53_014160	G2W53_014161	0.262528
G2W53_014201	G2W53_014202	0.641796
G2W53_014330	G2W53_014331	0.151409
G2W53_014446	G2W53_014447	0.18441
G2W53_014489	G2W53_014490	0.212555
G2W53_014499	G2W53_014500	0.0492991
G2W53_014503	G2W53_014504	0.406108
G2W53_014524	G2W53_014525	0.25343
G2W53_014525	G2W53_014526	0.41116
G2W53_014591	G2W53_014592	0.0600922
G2W53_014592	G2W53_014593	0.12724
G2W53_014790	G2W53_014791	0.0933241
G2W53_014849	G2W53_014850	0.218709
G2W53_014866	G2W53_014867	0.0353006
G2W53_014909	G2W53_014910	0.209137
G2W53_014922	G2W53_014923	0.198903
G2W53_015034	G2W53_015035	0
G2W53_015076	G2W53_015077	0.112059
G2W53_015109	G2W53_015110	0
G2W53_015142	G2W53_015143	0.124768
G2W53_015429	G2W53_015430	0.427844
G2W53_015437	G2W53_015438	0.180706
G2W53_015448	G2W53_015449	0.21148
G2W53_015507	G2W53_015508	0.051302
G2W53_015512	G2W53_015513	0.100037
G2W53_015622	G2W53_015623	0.542064
G2W53_015669	G2W53_015670	0.425645
G2W53_015678	G2W53_015679	0.512868
G2W53_015711	G2W53_015712	0.0398324
G2W53_015712	G2W53_015713	0.0326138
G2W53_015713	G2W53_015714	0.0110703
G2W53_015719	G2W53_015720	0.0836395
G2W53_015724	G2W53_015725	0.548166
G2W53_015748	G2W53_015749	0.719651
G2W53_015755	G2W53_015756	0.703673
G2W53_015831	G2W53_015832	0.165328
G2W53_015832	G2W53_015833	0.552228
G2W53_015859	G2W53_015860	0
G2W53_015876	G2W53_015877	0.34427
G2W53_015922	G2W53_015923	0.207319
G2W53_015926	G2W53_015927	0.0394828
G2W53_015935	G2W53_015936	0.246214
G2W53_015936	G2W53_015937	0.0701951
G2W53_015970	G2W53_015971	0.410592
G2W53_015987	G2W53_015988	0.10102
G2W53_015992	G2W53_015993	0.0108501
G2W53_015993	G2W53_015994	0.269531
G2W53_015994	G2W53_015995	0.0143889
G2W53_016012	G2W53_016013	0.524791
G2W53_016031	G2W53_016032	1.48359
G2W53_016038	G2W53_016039	0.526159
G2W53_016041	G2W53_016042	0.444117
G2W53_016045	G2W53_016046	0.440077
G2W53_016046	G2W53_016047	0.363824
G2W53_016050	G2W53_016051	0.551842
G2W53_016082	G2W53_016083	0.257799
G2W53_016086	G2W53_016087	0.77286
G2W53_016097	G2W53_016098	0.578956
G2W53_016098	G2W53_016099	0.494721
G2W53_016140	G2W53_016141	3.06334
G2W53_016155	G2W53_016156	0
G2W53_016160	G2W53_016161	0.153822
G2W53_016328	G2W53_016329	0.186195
G2W53_016357	G2W53_016358	0.300346
G2W53_016358	G2W53_016359	0.350899
G2W53_016458	G2W53_016459	0.0796504
G2W53_016496	G2W53_016497	2.20914
G2W53_016513	G2W53_016514	0.316539
G2W53_016514	G2W53_016515	0.0276848
G2W53_016538	G2W53_016539	0.12846
G2W53_016541	G2W53_016542	0.827158
G2W53_016544	G2W53_016545	2.38438
G2W53_016644	G2W53_016645	0.731951
G2W53_016645	G2W53_016646	0.104589
G2W53_016649	G2W53_016650	1.2989
G2W53_016672	G2W53_016673	0.455534
G2W53_016674	G2W53_016675	2.5735
G2W53_016677	G2W53_016678	0.884395
G2W53_016678	G2W53_016679	0.175438
G2W53_016702	G2W53_016703	0.101635
G2W53_016703	G2W53_016704	0.158394
G2W53_016745	G2W53_016746	0.292804
G2W53_016746	G2W53_016747	0.37165
G2W53_016751	G2W53_016752	0.333454
G2W53_016786	G2W53_016787	1.3824
G2W53_016792	G2W53_016793	0.386832
G2W53_016793	G2W53_016794	0.126336
G2W53_016796	G2W53_016797	0.456754
G2W53_016799	G2W53_016800	1.97704
G2W53_016802	G2W53_016803	0.834583
G2W53_016838	G2W53_016839	0.653687
G2W53_016840	G2W53_016841	0.204165
G2W53_016883	G2W53_016884	0.347495
G2W53_016886	G2W53_016887	0.191003
G2W53_016896	G2W53_016897	0.0710275
G2W53_016897	G2W53_016898	0.363202
G2W53_016899	G2W53_016900	0.705185
G2W53_016900	G2W53_016901	0.428631
G2W53_016901	G2W53_016902	0.378286
G2W53_016912	G2W53_016913	0.565172
G2W53_016916	G2W53_016917	0.177952
G2W53_016947	G2W53_016948	0.671999
G2W53_016948	G2W53_016949	1.02663
G2W53_016949	G2W53_016950	0.878765
G2W53_016950	G2W53_016951	0.768793
G2W53_016953	G2W53_016954	0.797641
G2W53_016969	G2W53_016970	0.0180732
G2W53_016977	G2W53_016978	0.250114
G2W53_017002	G2W53_017003	0.309814
G2W53_017003	G2W53_017004	0.231838
G2W53_017006	G2W53_017007	0.133908
G2W53_017045	G2W53_017046	0.0782468
G2W53_017060	G2W53_017061	1.2989
G2W53_017061	G2W53_017062	1.38552
G2W53_017071	G2W53_017072	0.575211
G2W53_017074	G2W53_017075	0.159127
G2W53_017081	G2W53_017082	2.16649
G2W53_017091	G2W53_017092	1.0927
G2W53_017102	G2W53_017103	0.0489364
G2W53_017138	G2W53_017139	0.160611
G2W53_017145	G2W53_017146	NaN
G2W53_017166	G2W53_017167	0.0528853
G2W53_017167	G2W53_017168	0.484764
G2W53_017231	G2W53_017232	0.327546
G2W53_017262	G2W53_017263	0.266683
G2W53_017289	G2W53_017290	0.0571705
G2W53_017292	G2W53_017293	0.219067
G2W53_017301	G2W53_017302	0.274384
G2W53_017302	G2W53_017303	0.611097
G2W53_017361	G2W53_017362	0.136976
G2W53_017407	G2W53_017408	0.491053
G2W53_017920	G2W53_017921	0
G2W53_018106	G2W53_018107	1.11227
G2W53_018296	G2W53_018297	0.469279
G2W53_018486	G2W53_018487	0.375083
G2W53_018572	G2W53_018573	0.23597
G2W53_018720	G2W53_018721	0.219331
G2W53_018754	G2W53_018755	0.3372
G2W53_018779	G2W53_018780	0.314227
G2W53_018783	G2W53_018784	0.150795
G2W53_018784	G2W53_018785	0.133553
G2W53_018785	G2W53_018786	0.153374
G2W53_018798	G2W53_018799	0.0577208
G2W53_018799	G2W53_018800	0.0691468
G2W53_018811	G2W53_018812	3.0542
G2W53_018813	G2W53_018814	0.164901
G2W53_018819	G2W53_018820	0.469754
G2W53_018826	G2W53_018827	0.389362
G2W53_018876	G2W53_018877	0.092019
G2W53_018930	G2W53_018931	0.344885
G2W53_018933	G2W53_018934	0.265812
G2W53_018934	G2W53_018935	0.612571
G2W53_018944	G2W53_018945	0.282893
G2W53_018946	G2W53_018947	1.39671
G2W53_018949	G2W53_018950	0.60746
G2W53_018951	G2W53_018952	1.60914
G2W53_018984	G2W53_018985	0.205917
G2W53_019025	G2W53_019026	0.37718
G2W53_019063	G2W53_019064	0.538098
G2W53_019067	G2W53_019068	0.489043
G2W53_019068	G2W53_019069	0.528428
G2W53_019069	G2W53_019070	0.657842
G2W53_019100	G2W53_019101	0.226373
G2W53_019101	G2W53_019102	0.191974
G2W53_019170	G2W53_019171	1.64123
G2W53_019300	G2W53_019301	1.27219
G2W53_019301	G2W53_019302	0.252023
G2W53_019343	G2W53_019344	0.156214
G2W53_019353	G2W53_019354	0.368235
G2W53_019354	G2W53_019355	0.399818
G2W53_019355	G2W53_019356	0.40892
G2W53_019356	G2W53_019357	NaN
G2W53_019507	G2W53_019508	0.956357
G2W53_019624	G2W53_019625	0.36687
G2W53_019625	G2W53_019626	0.340855
G2W53_019685	G2W53_019686	0.606344
G2W53_019708	G2W53_019709	0.41129
G2W53_019709	G2W53_019710	0.453497
G2W53_019730	G2W53_019731	0.220889
G2W53_019756	G2W53_019757	0.0912653
G2W53_019759	G2W53_019760	0.46083
G2W53_019797	G2W53_019798	1.53719
G2W53_019826	G2W53_019827	0.695927
G2W53_019829	G2W53_019830	0.556565
G2W53_019832	G2W53_019833	0.316033
G2W53_019835	G2W53_019836	0.0754349
G2W53_019884	G2W53_019885	1.04265
G2W53_019922	G2W53_019923	0.834513
G2W53_019923	G2W53_019924	0.714118
G2W53_019927	G2W53_019928	2.45551
G2W53_020011	G2W53_020012	1.3271
G2W53_020027	G2W53_020028	0.816877
G2W53_020034	G2W53_020035	0.497471
G2W53_020060	G2W53_020061	2.05714
G2W53_020098	G2W53_020099	0.426197
G2W53_020189	G2W53_020190	0.109933
G2W53_020195	G2W53_020196	1.55734
G2W53_020201	G2W53_020202	0.123993
G2W53_020229	G2W53_020230	1.88476
G2W53_020263	G2W53_020264	0
G2W53_020322	G2W53_020323	0.53474
G2W53_020324	G2W53_020325	NaN
G2W53_020351	G2W53_020352	0.306597
G2W53_020425	G2W53_020426	0.544298
G2W53_020426	G2W53_020427	0.521209
G2W53_020464	G2W53_020465	0.362224
G2W53_020609	G2W53_020610	NaN
G2W53_020663	G2W53_020664	1.25782
G2W53_020664	G2W53_020665	0.170395
G2W53_020698	G2W53_020699	0.370955
G2W53_020699	G2W53_020700	0.318355
G2W53_020701	G2W53_020702	1.47736
G2W53_020710	G2W53_020711	1.00807
G2W53_020711	G2W53_020712	0.786942
G2W53_020739	G2W53_020740	0.461293
G2W53_020742	G2W53_020743	0.237535
G2W53_020744	G2W53_020745	0.797632
G2W53_020750	G2W53_020751	0.826515
G2W53_020752	G2W53_020753	0.528765
G2W53_020753	G2W53_020754	0.393513
G2W53_020775	G2W53_020776	0.543804
G2W53_020805	G2W53_020806	1.58333
G2W53_020850	G2W53_020851	0.0498848
G2W53_020858	G2W53_020859	0.00620479
G2W53_020859	G2W53_020860	0
G2W53_020860	G2W53_020861	0.00620479
G2W53_020861	G2W53_020862	0.00620479
G2W53_020878	G2W53_020879	0.205515
G2W53_020887	G2W53_020888	0.255062
G2W53_020933	G2W53_020934	0.366593
G2W53_020941	G2W53_020942	1.02039
G2W53_020942	G2W53_020943	0.196055
G2W53_020947	G2W53_020948	0.317711
G2W53_020948	G2W53_020949	0.194001
G2W53_020949	G2W53_020950	0.46648
G2W53_020950	G2W53_020951	1.13843
G2W53_020958	G2W53_020959	0.931165
G2W53_020959	G2W53_020960	0.949977
G2W53_020960	G2W53_020961	0.836075
G2W53_020978	G2W53_020979	1.11668
G2W53_020979	G2W53_020980	0.388903
G2W53_020987	G2W53_020988	0.345878
G2W53_020988	G2W53_020989	0.234009
G2W53_021014	G2W53_021015	0.475268
G2W53_021017	G2W53_021018	0.535301
G2W53_021030	G2W53_021031	0.154932
G2W53_021038	G2W53_021039	0.113423
G2W53_021043	G2W53_021044	0.291684
G2W53_021044	G2W53_021045	0.233115
G2W53_021069	G2W53_021070	0.273088
G2W53_021070	G2W53_021071	0.271586
G2W53_021090	G2W53_021091	0.089044
G2W53_021118	G2W53_021119	0.190091
G2W53_021120	G2W53_021121	0.752202
G2W53_021142	G2W53_021143	0.877766
G2W53_021145	G2W53_021146	0.861536
G2W53_021146	G2W53_021147	0.388198
G2W53_021147	G2W53_021148	0.492075
G2W53_021148	G2W53_021149	0.613884
G2W53_021159	G2W53_021160	0.0859616
G2W53_021160	G2W53_021161	0.150031
G2W53_021205	G2W53_021206	0.284253
G2W53_021251	G2W53_021252	2.21106
G2W53_021252	G2W53_021253	0.189459
G2W53_021277	G2W53_021278	1.82722
G2W53_021289	G2W53_021290	0.314033
G2W53_021296	G2W53_021297	0.105436
G2W53_021331	G2W53_021332	1.55513
G2W53_021343	G2W53_021344	0.998408
G2W53_021344	G2W53_021345	0.928969
G2W53_021395	G2W53_021396	0.0411713
G2W53_021462	G2W53_021463	0.646241
G2W53_021472	G2W53_021473	0.414214
G2W53_021484	G2W53_021485	0.0582206
G2W53_021502	G2W53_021503	0.335674
G2W53_021508	G2W53_021509	0
G2W53_021562	G2W53_021563	0.454257
G2W53_021587	G2W53_021588	1.51137
G2W53_021606	G2W53_021607	0.796349
G2W53_021610	G2W53_021611	0.387942
G2W53_021624	G2W53_021625	0.0839384
G2W53_021625	G2W53_021626	0.344485
G2W53_021626	G2W53_021627	0.0571705
G2W53_021627	G2W53_021628	0.112772
G2W53_021631	G2W53_021632	0.40332
G2W53_021681	G2W53_021682	0.163379
G2W53_021682	G2W53_021683	0.153013
G2W53_021693	G2W53_021694	0
G2W53_021694	G2W53_021695	0
G2W53_021695	G2W53_021696	0.0619707
G2W53_021926	G2W53_021927	0.237532
G2W53_021986	G2W53_021987	0.107326
G2W53_022087	G2W53_022088	0.112889
G2W53_022088	G2W53_022089	0.0553246
G2W53_022091	G2W53_022092	0.0526532
G2W53_022092	G2W53_022093	0
G2W53_022103	G2W53_022104	0.149375
G2W53_022142	G2W53_022143	0.193662
G2W53_022292	G2W53_022293	0.605616
G2W53_022346	G2W53_022347	0.0327921
G2W53_022365	G2W53_022366	0.0228048
G2W53_022436	G2W53_022437	0.0961314
G2W53_022464	G2W53_022465	0.0309032
G2W53_022471	G2W53_022472	0.182717
G2W53_022543	G2W53_022544	0.122722
G2W53_022631	G2W53_022632	0.0898405
G2W53_022632	G2W53_022633	0.576425
G2W53_022633	G2W53_022634	0.195027
G2W53_022634	G2W53_022635	0.115281
G2W53_022643	G2W53_022644	0.60138
G2W53_022655	G2W53_022656	0.143421
G2W53_022669	G2W53_022670	0.0560281
G2W53_022673	G2W53_022674	0.357169
G2W53_022677	G2W53_022678	0
G2W53_022678	G2W53_022679	0.282286
G2W53_022684	G2W53_022685	0.048547
G2W53_022731	G2W53_022732	0.226171
G2W53_022732	G2W53_022733	0.223267
G2W53_022762	G2W53_022763	0.74423
G2W53_022764	G2W53_022765	0.402424
G2W53_022771	G2W53_022772	0.0424026
G2W53_022772	G2W53_022773	0.0543621
G2W53_022802	G2W53_022803	0.727711
G2W53_022815	G2W53_022816	0.25826
G2W53_022821	G2W53_022822	0.50553
G2W53_022822	G2W53_022823	0.587319
G2W53_022823	G2W53_022824	0.251045
G2W53_022824	G2W53_022825	0.283695
G2W53_022825	G2W53_022826	0.242799
G2W53_022826	G2W53_022827	0.279431
G2W53_022827	G2W53_022828	0.841005
G2W53_022830	G2W53_022831	0.237428
G2W53_022831	G2W53_022832	0.232616
G2W53_022837	G2W53_022838	0.0851979
G2W53_022840	G2W53_022841	2.70986
G2W53_022842	G2W53_022843	0.962957
G2W53_022862	G2W53_022863	0.727635
G2W53_022863	G2W53_022864	0.302381
G2W53_022864	G2W53_022865	0.196895
G2W53_022866	G2W53_022867	1.73347
G2W53_022896	G2W53_022897	0.140018
G2W53_022926	G2W53_022927	0.216996
G2W53_022972	G2W53_022973	0.0465594
G2W53_022981	G2W53_022982	0.281635
G2W53_023001	G2W53_023002	0.109191
G2W53_023002	G2W53_023003	0.0730349
G2W53_023003	G2W53_023004	0.0907889
G2W53_023004	G2W53_023005	0.183301
G2W53_023019	G2W53_023020	0.372332
G2W53_023036	G2W53_023037	1.37555
G2W53_023072	G2W53_023073	0.512123
G2W53_023085	G2W53_023086	0.608299
G2W53_023086	G2W53_023087	0.346338
G2W53_023109	G2W53_023110	0.946572
G2W53_023120	G2W53_023121	0.547802
G2W53_023202	G2W53_023203	0.314333
G2W53_023228	G2W53_023229	1.75153
G2W53_023229	G2W53_023230	1.87786
G2W53_023230	G2W53_023231	1.49566
G2W53_023293	G2W53_023294	NaN
G2W53_023294	G2W53_023295	0.732687
G2W53_023295	G2W53_023296	1.33827
G2W53_023312	G2W53_023313	0.397303
G2W53_023315	G2W53_023316	0.663171
G2W53_023413	G2W53_023414	0.897063
G2W53_023455	G2W53_023456	0.0402781
G2W53_023464	G2W53_023465	0.51351
G2W53_023479	G2W53_023480	0.41905
G2W53_023484	G2W53_023485	NaN
G2W53_023558	G2W53_023559	1.45683
G2W53_023581	G2W53_023582	0.665923
G2W53_023691	G2W53_023692	1.49608
G2W53_023710	G2W53_023711	0.436342
G2W53_023811	G2W53_023812	0.29045
G2W53_023812	G2W53_023813	0.772032
G2W53_023813	G2W53_023814	0.774659
G2W53_023814	G2W53_023815	1.75597
G2W53_023861	G2W53_023862	NaN
G2W53_023868	G2W53_023869	0.7283
G2W53_023872	G2W53_023873	0.523849
G2W53_023905	G2W53_023906	1.63644
G2W53_023921	G2W53_023922	0.196773
G2W53_023922	G2W53_023923	0.0238115
G2W53_023993	G2W53_023994	1.72095
G2W53_024017	G2W53_024018	NaN
G2W53_024026	G2W53_024027	0.223078
G2W53_024144	G2W53_024145	0.393271
G2W53_024145	G2W53_024146	0.20046
G2W53_024182	G2W53_024183	1.00465
G2W53_024231	G2W53_024232	NaN
G2W53_024278	G2W53_024279	0.400247
G2W53_024355	G2W53_024356	0.503376
G2W53_024356	G2W53_024357	2.12782
G2W53_024378	G2W53_024379	0.281278
G2W53_024436	G2W53_024437	2.12855
G2W53_024437	G2W53_024438	1.74223
G2W53_024495	G2W53_024496	0.285119
G2W53_024502	G2W53_024503	0.58509
G2W53_024534	G2W53_024535	0.514118
G2W53_024558	G2W53_024559	0.247444
G2W53_024581	G2W53_024582	0.951884
G2W53_024582	G2W53_024583	0.166008
G2W53_024583	G2W53_024584	1.08636
G2W53_024642	G2W53_024643	1.44404
G2W53_024668	G2W53_024669	0.511427
G2W53_024672	G2W53_024673	1.17229
G2W53_024673	G2W53_024674	0.285552
G2W53_024696	G2W53_024697	1.98192
G2W53_024701	G2W53_024702	1.53381
G2W53_024723	G2W53_024724	0.233478
G2W53_024724	G2W53_024725	0.447873
G2W53_024743	G2W53_024744	0.137527
G2W53_024745	G2W53_024746	2.05673
G2W53_024766	G2W53_024767	NaN
G2W53_024781	G2W53_024782	0.745652
G2W53_024787	G2W53_024788	1.54314
G2W53_024880	G2W53_024881	0.080076
G2W53_024912	G2W53_024913	1.4336
G2W53_024932	G2W53_024933	1.26193
G2W53_024943	G2W53_024944	0.284823
G2W53_024955	G2W53_024956	0.334036
G2W53_024958	G2W53_024959	1.6946
G2W53_024960	G2W53_024961	0.83277
G2W53_025000	G2W53_025001	0.0975852
G2W53_025006	G2W53_025007	2.94205
G2W53_025045	G2W53_025046	1.65537
G2W53_025046	G2W53_025047	0.981347
G2W53_025047	G2W53_025048	0.7048
G2W53_025048	G2W53_025049	0.342207
G2W53_025132	G2W53_025133	0.298839
G2W53_025143	G2W53_025144	0.159495
G2W53_025202	G2W53_025203	1.71856
G2W53_025310	G2W53_025311	0.274642
G2W53_025311	G2W53_025312	0.129424
G2W53_025312	G2W53_025313	0.498691
G2W53_025349	G2W53_025350	1.45695
G2W53_025354	G2W53_025355	0.351593
G2W53_025365	G2W53_025366	NaN
G2W53_025375	G2W53_025376	0.0711645
G2W53_025390	G2W53_025391	0.328011
G2W53_025393	G2W53_025394	0.0894132
G2W53_025415	G2W53_025416	0.18586
G2W53_025418	G2W53_025419	0.387659
G2W53_025421	G2W53_025422	0.235595
G2W53_025422	G2W53_025423	0.151686
G2W53_025479	G2W53_025480	0.00932655
G2W53_025480	G2W53_025481	0.997153
G2W53_025486	G2W53_025487	0.261492
G2W53_025488	G2W53_025489	NaN
G2W53_025514	G2W53_025515	0
G2W53_025515	G2W53_025516	1.38067
G2W53_025517	G2W53_025518	0.100858
G2W53_025519	G2W53_025520	0.70831
G2W53_025559	G2W53_025560	0.0365926
G2W53_025581	G2W53_025582	0.517579
G2W53_025626	G2W53_025627	0.132818
G2W53_025637	G2W53_025638	0.871639
G2W53_025638	G2W53_025639	0.298772
G2W53_025639	G2W53_025640	1.59587
G2W53_025698	G2W53_025699	0.199571
G2W53_025699	G2W53_025700	0.777006
G2W53_025724	G2W53_025725	0.471963
G2W53_025725	G2W53_025726	0.498876
G2W53_025742	G2W53_025743	2.16519
G2W53_025747	G2W53_025748	0.181183
G2W53_025748	G2W53_025749	1.25656
G2W53_025751	G2W53_025752	0.171835
G2W53_025773	G2W53_025774	1.12398
G2W53_025776	G2W53_025777	0.241358
G2W53_025797	G2W53_025798	0.351672
G2W53_025802	G2W53_025803	0.152771
G2W53_025803	G2W53_025804	0.179007
G2W53_025837	G2W53_025838	0.0425646
G2W53_025868	G2W53_025869	0.200063
G2W53_025875	G2W53_025876	0.102099
G2W53_025876	G2W53_025877	0.109444
G2W53_025905	G2W53_025906	1.26501
G2W53_025906	G2W53_025907	0.243927
G2W53_025907	G2W53_025908	2.10645
G2W53_026025	G2W53_026026	NaN
G2W53_026033	G2W53_026034	0
G2W53_026119	G2W53_026120	0.147855
G2W53_026141	G2W53_026142	0.319
G2W53_026142	G2W53_026143	0.0432973
G2W53_026217	G2W53_026218	0.027526
G2W53_026252	G2W53_026253	0.0121492
G2W53_026283	G2W53_026284	0.0387461
G2W53_026285	G2W53_026286	0.0136678
G2W53_026310	G2W53_026311	0.125291
G2W53_026326	G2W53_026327	0
G2W53_026360	G2W53_026361	0.343502
G2W53_026419	G2W53_026420	0.44084
G2W53_026420	G2W53_026421	0.180872
G2W53_026473	G2W53_026474	0.212681
G2W53_026482	G2W53_026483	0.42377
G2W53_026486	G2W53_026487	0.117889
G2W53_026527	G2W53_026528	0.059437
G2W53_026561	G2W53_026562	0.0392246
G2W53_026891	G2W53_026892	0.279365
G2W53_026909	G2W53_026910	0.197344
G2W53_026917	G2W53_026918	0.246839
G2W53_026925	G2W53_026926	0.191644
G2W53_026941	G2W53_026942	0.306295
G2W53_026950	G2W53_026951	0.406479
G2W53_026977	G2W53_026978	0.119061
G2W53_026978	G2W53_026979	0.117889
G2W53_026991	G2W53_026992	0.0571705
G2W53_026992	G2W53_026993	0.116174
G2W53_027030	G2W53_027031	0
G2W53_027089	G2W53_027090	0.493364
G2W53_027092	G2W53_027093	0.956032
G2W53_027124	G2W53_027125	0.153474
G2W53_027556	G2W53_027557	0.603638
G2W53_027610	G2W53_027611	1.73849
G2W53_027717	G2W53_027718	0.131702
G2W53_027740	G2W53_027741	0.493912
G2W53_027830	G2W53_027831	2.29692
G2W53_027841	G2W53_027842	1.22062
G2W53_027847	G2W53_027848	0.0769869
G2W53_027848	G2W53_027849	0.749171
G2W53_027852	G2W53_027853	0
G2W53_027874	G2W53_027875	1.00578
G2W53_027884	G2W53_027885	0.301214
G2W53_027933	G2W53_027934	0.280958
G2W53_027947	G2W53_027948	0.920536
G2W53_027952	G2W53_027953	0.809896
G2W53_027959	G2W53_027960	0.66707
G2W53_027984	G2W53_027985	0.773621
G2W53_027992	G2W53_027993	0.320779
G2W53_027997	G2W53_027998	0.349094
G2W53_027998	G2W53_027999	0.58822
G2W53_027999	G2W53_028000	0.583834
G2W53_028011	G2W53_028012	1.39196
G2W53_028012	G2W53_028013	1.01654
G2W53_028021	G2W53_028022	0.619862
G2W53_028025	G2W53_028026	1.05794
G2W53_028027	G2W53_028028	0.0131282
G2W53_028028	G2W53_028029	0.000977677
G2W53_028060	G2W53_028061	0.0731287
G2W53_028075	G2W53_028076	0.97098
G2W53_028094	G2W53_028095	0.700572
G2W53_028095	G2W53_028096	0.679992
G2W53_028154	G2W53_028155	0.67024
G2W53_028157	G2W53_028158	0.356546
G2W53_028163	G2W53_028164	0.969232
G2W53_028164	G2W53_028165	1.26155
G2W53_028171	G2W53_028172	0.728475
G2W53_028172	G2W53_028173	0.649321
G2W53_028238	G2W53_028239	0.480836
G2W53_028242	G2W53_028243	0.562539
G2W53_028245	G2W53_028246	0.992286
G2W53_028274	G2W53_028275	0.423789
G2W53_028275	G2W53_028276	2.66122
G2W53_028293	G2W53_028294	0.236498
G2W53_028294	G2W53_028295	0.414175
G2W53_028372	G2W53_028373	0.0528305
G2W53_028459	G2W53_028460	0.499336
G2W53_028460	G2W53_028461	0.108679
G2W53_028514	G2W53_028515	1.65428
G2W53_028527	G2W53_028528	0.462385
G2W53_028529	G2W53_028530	0.477388
G2W53_028672	G2W53_028673	0.148193
G2W53_028761	G2W53_028762	0.576915
G2W53_028764	G2W53_028765	0.413096
G2W53_029081	G2W53_029082	0.0731348
G2W53_029086	G2W53_029087	0.247047
G2W53_029089	G2W53_029090	NaN
G2W53_029110	G2W53_029111	0.0316461
G2W53_029155	G2W53_029156	0.242739
G2W53_029218	G2W53_029219	0.272642
G2W53_029246	G2W53_029247	0.327559
G2W53_029247	G2W53_029248	0.318848
G2W53_029265	G2W53_029266	0.469056
G2W53_029269	G2W53_029270	0.208111
G2W53_029290	G2W53_029291	0.193004
G2W53_029296	G2W53_029297	0.19254
G2W53_029303	G2W53_029304	0.689463
G2W53_029317	G2W53_029318	0.101792
G2W53_029342	G2W53_029343	0.838449
G2W53_029347	G2W53_029348	0.172181
G2W53_029373	G2W53_029374	0.589917
G2W53_029374	G2W53_029375	2.20164
G2W53_029375	G2W53_029376	0.693926
G2W53_029398	G2W53_029399	0.504708
G2W53_029449	G2W53_029450	0.576409
G2W53_029457	G2W53_029458	0.345741
G2W53_029459	G2W53_029460	0.291396
G2W53_029468	G2W53_029469	0
G2W53_029469	G2W53_029470	0.0614828
G2W53_029470	G2W53_029471	0.0268987
G2W53_029473	G2W53_029474	0.358409
G2W53_029477	G2W53_029478	0.48864
G2W53_029489	G2W53_029490	0.820384
G2W53_029503	G2W53_029504	0.886723
G2W53_029514	G2W53_029515	0.282358
G2W53_029553	G2W53_029554	0.215626
G2W53_029562	G2W53_029563	0.321878
G2W53_029563	G2W53_029564	0.385382
G2W53_029564	G2W53_029565	0.196656
G2W53_029585	G2W53_029586	3.70039
G2W53_029598	G2W53_029599	0.177292
G2W53_029605	G2W53_029606	0.484625
G2W53_029621	G2W53_029622	0.354939
G2W53_029622	G2W53_029623	0.111065
G2W53_029623	G2W53_029624	0.617271
G2W53_029640	G2W53_029641	0.144411
G2W53_029642	G2W53_029643	0.991841
G2W53_029658	G2W53_029659	0.394755
G2W53_029662	G2W53_029663	2.31251
G2W53_029664	G2W53_029665	0.406644
G2W53_029673	G2W53_029674	0.0739787
G2W53_029674	G2W53_029675	0.186681
G2W53_029699	G2W53_029700	NaN
G2W53_029702	G2W53_029703	0.692201
G2W53_029712	G2W53_029713	0.215588
G2W53_029713	G2W53_029714	0.252464
G2W53_029715	G2W53_029716	0.107647
G2W53_029717	G2W53_029718	0.529067
G2W53_029733	G2W53_029734	0.244512
G2W53_029754	G2W53_029755	0.172486
G2W53_029757	G2W53_029758	0.068888
G2W53_029776	G2W53_029777	0.371608
G2W53_029811	G2W53_029812	0.513147
G2W53_029824	G2W53_029825	0.52935
G2W53_029827	G2W53_029828	0.319894
G2W53_029830	G2W53_029831	0.762163
G2W53_029831	G2W53_029832	0.83311
G2W53_029849	G2W53_029850	0.298652
G2W53_029872	G2W53_029873	0.908896
G2W53_029883	G2W53_029884	0.385273
G2W53_029890	G2W53_029891	0.610228
G2W53_029891	G2W53_029892	0.0970958
G2W53_029895	G2W53_029896	0.298375
G2W53_029898	G2W53_029899	1.03365
G2W53_029920	G2W53_029921	0.811145
G2W53_029926	G2W53_029927	0.205875
G2W53_029941	G2W53_029942	0.204676
G2W53_029954	G2W53_029955	1.10691
G2W53_029955	G2W53_029956	0.126489
G2W53_029956	G2W53_029957	0.164339
G2W53_029986	G2W53_029987	1.06954
G2W53_029987	G2W53_029988	1.12258
G2W53_029988	G2W53_029989	1.97441
G2W53_030064	G2W53_030065	0.273134
G2W53_030074	G2W53_030075	1.95084
G2W53_030097	G2W53_030098	0
G2W53_030128	G2W53_030129	1.86793
G2W53_030129	G2W53_030130	1.0308
G2W53_030131	G2W53_030132	0.322961
G2W53_030132	G2W53_030133	0.127409
G2W53_030133	G2W53_030134	0.776145
G2W53_030142	G2W53_030143	1.35695
G2W53_030146	G2W53_030147	0.815269
G2W53_030150	G2W53_030151	0.292488
G2W53_030154	G2W53_030155	1.54809
G2W53_030172	G2W53_030173	0.950195
G2W53_030202	G2W53_030203	0.253144
G2W53_030203	G2W53_030204	0.0628467
G2W53_030206	G2W53_030207	0.159115
G2W53_030213	G2W53_030214	2.79374
G2W53_030218	G2W53_030219	0.134949
G2W53_030294	G2W53_030295	0.457023
G2W53_030295	G2W53_030296	0.605062
G2W53_030351	G2W53_030352	0.0735884
G2W53_030384	G2W53_030385	0.123025
G2W53_030385	G2W53_030386	0.0945588
G2W53_030386	G2W53_030387	0.3246
G2W53_030387	G2W53_030388	0.324224
G2W53_030388	G2W53_030389	0.129456
G2W53_030391	G2W53_030392	0
G2W53_030392	G2W53_030393	0
G2W53_030460	G2W53_030461	0.0394179
G2W53_030492	G2W53_030493	0.0384348
G2W53_030508	G2W53_030509	3.30362
G2W53_030618	G2W53_030619	1.28968
G2W53_030622	G2W53_030623	0.305601
G2W53_030674	G2W53_030675	1.77276
G2W53_030677	G2W53_030678	1.61382
G2W53_030740	G2W53_030741	0.382616
G2W53_030741	G2W53_030742	0.133786
G2W53_030749	G2W53_030750	0.598891
G2W53_030750	G2W53_030751	0.409486
G2W53_030752	G2W53_030753	0.739765
G2W53_030753	G2W53_030754	0.692687
G2W53_030777	G2W53_030778	0.471986
G2W53_030793	G2W53_030794	0.400933
G2W53_030794	G2W53_030795	1.69239
G2W53_030823	G2W53_030824	0.553246
G2W53_030843	G2W53_030844	0.663539
G2W53_030857	G2W53_030858	0.18287
G2W53_030859	G2W53_030860	0.740282
G2W53_030905	G2W53_030906	3.01596
G2W53_030912	G2W53_030913	0.432893
G2W53_030913	G2W53_030914	0.210944
G2W53_030914	G2W53_030915	0.162585
G2W53_030915	G2W53_030916	0.657119
G2W53_031010	G2W53_031011	NaN
G2W53_031022	G2W53_031023	1.67123
G2W53_031181	G2W53_031182	0.369502
G2W53_031350	G2W53_031351	0.171159
G2W53_031351	G2W53_031352	0.156316
G2W53_031374	G2W53_031375	0.240266
G2W53_031427	G2W53_031428	1.8721
G2W53_031498	G2W53_031499	0.182437
G2W53_031533	G2W53_031534	0.343843
G2W53_031594	G2W53_031595	0.251152
G2W53_031628	G2W53_031629	1.47201
G2W53_031652	G2W53_031653	NaN
G2W53_031690	G2W53_031691	NaN
G2W53_031759	G2W53_031760	0.362004
G2W53_031813	G2W53_031814	1.34098
G2W53_031815	G2W53_031816	0.27343
G2W53_031826	G2W53_031827	NaN
G2W53_031840	G2W53_031841	0.196465
G2W53_031843	G2W53_031844	0.523878
G2W53_031847	G2W53_031848	3.52263
G2W53_031848	G2W53_031849	0.586839
G2W53_031851	G2W53_031852	0.483411
G2W53_031869	G2W53_031870	0.547129
G2W53_031870	G2W53_031871	1.08839
G2W53_031874	G2W53_031875	1.81212
G2W53_031905	G2W53_031906	NaN
G2W53_031922	G2W53_031923	0.275794
G2W53_031953	G2W53_031954	0.189265
G2W53_031954	G2W53_031955	0.086116
G2W53_031955	G2W53_031956	0.141732
G2W53_031971	G2W53_031972	2.17796
G2W53_031978	G2W53_031979	0.213841
G2W53_031979	G2W53_031980	0.715744
G2W53_031982	G2W53_031983	0.636533
G2W53_031983	G2W53_031984	0.463428
G2W53_031988	G2W53_031989	NaN
G2W53_032003	G2W53_032004	0.681943
G2W53_032005	G2W53_032006	1.54477
G2W53_032009	G2W53_032010	2.22939
G2W53_032053	G2W53_032054	0.232958
G2W53_032054	G2W53_032055	0.453038
G2W53_032055	G2W53_032056	0.621055
G2W53_032058	G2W53_032059	0.492467
G2W53_032060	G2W53_032061	2.50926
G2W53_032082	G2W53_032083	1.82652
G2W53_032083	G2W53_032084	0.631531
G2W53_032084	G2W53_032085	0.796584
G2W53_032085	G2W53_032086	0.641731
G2W53_032092	G2W53_032093	0.526736
G2W53_032097	G2W53_032098	0.788712
G2W53_032100	G2W53_032101	0.973956
G2W53_032101	G2W53_032102	2.25279
G2W53_032126	G2W53_032127	0.15234
G2W53_032133	G2W53_032134	0
G2W53_032163	G2W53_032164	2.04783
G2W53_032164	G2W53_032165	0.137539
G2W53_032190	G2W53_032191	0.179717
G2W53_032191	G2W53_032192	0.145029
G2W53_032192	G2W53_032193	0.176854
G2W53_032249	G2W53_032250	0
G2W53_032263	G2W53_032264	1.80719
G2W53_032289	G2W53_032290	0.795486
G2W53_032291	G2W53_032292	0.499423
G2W53_032293	G2W53_032294	0.439396
G2W53_032296	G2W53_032297	0.462864
G2W53_032297	G2W53_032298	0.599901
G2W53_032298	G2W53_032299	0.479434
G2W53_032313	G2W53_032314	0.099552
G2W53_032314	G2W53_032315	0.32029
G2W53_032333	G2W53_032334	0.728741
G2W53_032336	G2W53_032337	0.409488
G2W53_032337	G2W53_032338	0.371278
G2W53_032338	G2W53_032339	0.583278
G2W53_032339	G2W53_032340	0.84271
G2W53_032359	G2W53_032360	0.37075
G2W53_032365	G2W53_032366	1.09127
G2W53_032373	G2W53_032374	0.0311346
G2W53_032379	G2W53_032380	0.103655
G2W53_032401	G2W53_032402	0.420735
G2W53_032455	G2W53_032456	0.422236
G2W53_032458	G2W53_032459	0.650507
G2W53_032459	G2W53_032460	0.373482
G2W53_032477	G2W53_032478	0.0460503
G2W53_032491	G2W53_032492	0.28306
G2W53_032574	G2W53_032575	0.0497076
G2W53_032580	G2W53_032581	0.19219
G2W53_032618	G2W53_032619	0.0694137
G2W53_032711	G2W53_032712	0.0186842
G2W53_032714	G2W53_032715	0.331718
G2W53_032772	G2W53_032773	0.134161
G2W53_032774	G2W53_032775	0.158482
G2W53_032836	G2W53_032837	0.0577208
G2W53_032837	G2W53_032838	0.385617
G2W53_032848	G2W53_032849	0.374752
G2W53_032849	G2W53_032850	0.146091
G2W53_032855	G2W53_032856	0.501091
G2W53_033050	G2W53_033051	0.060334
G2W53_033051	G2W53_033052	0.060334
G2W53_033052	G2W53_033053	0
G2W53_033173	G2W53_033174	0.048997
G2W53_033415	G2W53_033416	0.086116
G2W53_033488	G2W53_033489	0.181285
G2W53_033596	G2W53_033597	0.230603
G2W53_033630	G2W53_033631	0.469594
G2W53_033660	G2W53_033661	0.172658
G2W53_033667	G2W53_033668	0.33378
G2W53_033672	G2W53_033673	0.158231
G2W53_033982	G2W53_033983	0.690486
G2W53_033986	G2W53_033987	0.842453
G2W53_034022	G2W53_034023	0.0914373
G2W53_034062	G2W53_034063	0.118222
G2W53_034063	G2W53_034064	0.181329
G2W53_034064	G2W53_034065	0.186717
G2W53_034065	G2W53_034066	0.753152
G2W53_034066	G2W53_034067	0.263548
G2W53_034067	G2W53_034068	0.16264
G2W53_034068	G2W53_034069	0.0908932
G2W53_034069	G2W53_034070	0.443371
G2W53_034073	G2W53_034074	0
G2W53_034097	G2W53_034098	0.577865
G2W53_034143	G2W53_034144	0.102666
G2W53_034149	G2W53_034150	0.157082
G2W53_034153	G2W53_034154	0.0496049
G2W53_034170	G2W53_034171	0.220694
G2W53_034188	G2W53_034189	2.25082
G2W53_034265	G2W53_034266	0.955584
G2W53_034302	G2W53_034303	0.947885
G2W53_034305	G2W53_034306	1.28402
G2W53_034306	G2W53_034307	1.05716
G2W53_034310	G2W53_034311	0.290757
G2W53_034311	G2W53_034312	0.595555
G2W53_034319	G2W53_034320	0.810815
G2W53_034343	G2W53_034344	0.407378
G2W53_034359	G2W53_034360	0.396051
G2W53_034360	G2W53_034361	0.405936
G2W53_034384	G2W53_034385	0.510414
G2W53_034386	G2W53_034387	0.16253
G2W53_034387	G2W53_034388	0.140453
G2W53_034388	G2W53_034389	0.071456
G2W53_034389	G2W53_034390	0.101121
G2W53_034390	G2W53_034391	0.114278
G2W53_034404	G2W53_034405	0.562195
G2W53_034405	G2W53_034406	0.207958
G2W53_034407	G2W53_034408	0.457331
G2W53_034419	G2W53_034420	0.388764
G2W53_034456	G2W53_034457	0.367294
G2W53_034463	G2W53_034464	1.12757
G2W53_034464	G2W53_034465	0.255852
G2W53_034475	G2W53_034476	0.587997
G2W53_034493	G2W53_034494	1.68502
G2W53_034507	G2W53_034508	0.0312545
G2W53_034508	G2W53_034509	0.0990448
G2W53_034509	G2W53_034510	0.0533084
G2W53_034510	G2W53_034511	0.0315836
G2W53_034511	G2W53_034512	0.0643251
G2W53_034515	G2W53_034516	0.589691
G2W53_034518	G2W53_034519	0.24434
G2W53_034519	G2W53_034520	0.284253
G2W53_034520	G2W53_034521	0.64263
G2W53_034521	G2W53_034522	0.0309855
G2W53_034547	G2W53_034548	0.106234
G2W53_034559	G2W53_034560	1.75825
G2W53_034650	G2W53_034651	0.427704
G2W53_034657	G2W53_034658	0.969011
G2W53_034662	G2W53_034663	2.48669
G2W53_034703	G2W53_034704	0.425134
G2W53_034704	G2W53_034705	0.382007
G2W53_034705	G2W53_034706	0.662801
G2W53_034706	G2W53_034707	0.218905
G2W53_034716	G2W53_034717	0.340034
G2W53_034749	G2W53_034750	0.418119
G2W53_034765	G2W53_034766	0.225741
G2W53_034915	G2W53_034916	0.197112
G2W53_034921	G2W53_034922	0.00552998
G2W53_034957	G2W53_034958	0.145322
G2W53_034969	G2W53_034970	NaN
G2W53_035121	G2W53_035122	NaN
G2W53_035203	G2W53_035204	0.796637
G2W53_035326	G2W53_035327	0.0836091
G2W53_035363	G2W53_035364	0.332084
G2W53_035395	G2W53_035396	0.200704
G2W53_035400	G2W53_035401	0.430198
G2W53_035401	G2W53_035402	0.107523
G2W53_035403	G2W53_035404	0.463024
G2W53_035405	G2W53_035406	0.216852
G2W53_035406	G2W53_035407	0.195127
G2W53_035427	G2W53_035428	0.120487
G2W53_035430	G2W53_035431	0.0700217
G2W53_035433	G2W53_035434	0.0613725
G2W53_035443	G2W53_035444	0.129331
G2W53_035444	G2W53_035445	0.0947069
G2W53_035445	G2W53_035446	0.119051
G2W53_035449	G2W53_035450	0.259707
G2W53_035462	G2W53_035463	1.43807
G2W53_035464	G2W53_035465	0.14802
G2W53_035465	G2W53_035466	0.581298
G2W53_035466	G2W53_035467	1.12232
G2W53_035467	G2W53_035468	0.257654
G2W53_035470	G2W53_035471	0.430094
G2W53_035473	G2W53_035474	0.181054
G2W53_035474	G2W53_035475	0.536946
G2W53_035475	G2W53_035476	0.316196
G2W53_035476	G2W53_035477	0.106009
G2W53_035489	G2W53_035490	1.10314
G2W53_035545	G2W53_035546	0.256911
G2W53_035546	G2W53_035547	0.573216
G2W53_035547	G2W53_035548	0.628166
G2W53_035553	G2W53_035554	0.453168
G2W53_035578	G2W53_035579	2.91169
G2W53_035596	G2W53_035597	0.642272
G2W53_035601	G2W53_035602	1.88739
G2W53_035636	G2W53_035637	0.357307
G2W53_035690	G2W53_035691	0.56158
G2W53_035739	G2W53_035740	0.296213
G2W53_035740	G2W53_035741	0.379547
G2W53_035741	G2W53_035742	0.644945
G2W53_035746	G2W53_035747	1.54205
G2W53_035794	G2W53_035795	0.526335
G2W53_035840	G2W53_035841	0.345743
G2W53_035847	G2W53_035848	0.356471
G2W53_035860	G2W53_035861	1.43417
G2W53_035928	G2W53_035929	1.53186
G2W53_035929	G2W53_035930	0.220521
G2W53_035935	G2W53_035936	0.536868
G2W53_035946	G2W53_035947	0.132404
G2W53_035995	G2W53_035996	0.59928
G2W53_035996	G2W53_035997	0.736352
G2W53_036010	G2W53_036011	1.49914
G2W53_036031	G2W53_036032	0.405114
G2W53_036032	G2W53_036033	0.617243
G2W53_036155	G2W53_036156	1.58041
G2W53_036162	G2W53_036163	0.816931
G2W53_036165	G2W53_036166	0.137177
G2W53_036226	G2W53_036227	0.319733
G2W53_036322	G2W53_036323	2.07002
G2W53_036341	G2W53_036342	0.511315
G2W53_036390	G2W53_036391	0.350618
G2W53_036395	G2W53_036396	0.491892
G2W53_036445	G2W53_036446	0.626192
G2W53_036447	G2W53_036448	0.779358
G2W53_036448	G2W53_036449	0.233557
G2W53_036449	G2W53_036450	NaN
G2W53_036523	G2W53_036524	0.139566
G2W53_036524	G2W53_036525	0.317874
G2W53_036525	G2W53_036526	1.69557
G2W53_036538	G2W53_036539	6.0313
G2W53_036541	G2W53_036542	0.172089
G2W53_036624	G2W53_036625	0.1031
G2W53_036625	G2W53_036626	0.0859902
G2W53_036721	G2W53_036722	2.26833
G2W53_036740	G2W53_036741	0.0653232
G2W53_036741	G2W53_036742	0.039633
G2W53_036849	G2W53_036850	0.0712279
G2W53_036850	G2W53_036851	0.118377
G2W53_036863	G2W53_036864	3.57163
G2W53_036894	G2W53_036895	0.108748
G2W53_036895	G2W53_036896	0.0285749
G2W53_036946	G2W53_036947	0.425078
G2W53_037077	G2W53_037078	0.167949
G2W53_037081	G2W53_037082	0.0938724
G2W53_037153	G2W53_037154	0.476141
G2W53_037173	G2W53_037174	0.207994
G2W53_037344	G2W53_037345	0
G2W53_037381	G2W53_037382	0.0171436
G2W53_037425	G2W53_037426	1.24829
G2W53_037525	G2W53_037526	0.38894
G2W53_037528	G2W53_037529	0.348107
G2W53_037641	G2W53_037642	0.14459
G2W53_037647	G2W53_037648	0.351626
G2W53_037675	G2W53_037676	NaN
G2W53_037689	G2W53_037690	1.06808
G2W53_037721	G2W53_037722	NaN
G2W53_037725	G2W53_037726	1.43992
G2W53_037726	G2W53_037727	0.251022
G2W53_037727	G2W53_037728	1.74591
G2W53_037731	G2W53_037732	0.3834
G2W53_037785	G2W53_037786	0.458611
G2W53_037786	G2W53_037787	0.179759
G2W53_037912	G2W53_037913	1.51681
G2W53_037986	G2W53_037987	NaN
G2W53_037998	G2W53_037999	0.546362
G2W53_038017	G2W53_038018	1.5581
G2W53_038020	G2W53_038021	1.06517
G2W53_038031	G2W53_038032	0.544342
G2W53_038042	G2W53_038043	1.69587
G2W53_038046	G2W53_038047	NaN
G2W53_038049	G2W53_038050	2.17353
G2W53_038057	G2W53_038058	NaN
G2W53_038094	G2W53_038095	0.452969
G2W53_038099	G2W53_038100	1.23415
G2W53_038124	G2W53_038125	0.342144
G2W53_038179	G2W53_038180	1.11702
G2W53_038191	G2W53_038192	0.0232435
G2W53_038271	G2W53_038272	0.183058
G2W53_038290	G2W53_038291	0.397307
G2W53_038320	G2W53_038321	0.161366
G2W53_038321	G2W53_038322	0.0233482
G2W53_038410	G2W53_038411	0.435484
G2W53_038439	G2W53_038440	NaN
G2W53_038587	G2W53_038588	0.785951
G2W53_038598	G2W53_038599	1.03337
G2W53_038599	G2W53_038600	0.515493
G2W53_038714	G2W53_038715	0.956519
G2W53_038727	G2W53_038728	0.134735
G2W53_038766	G2W53_038767	1.0859
G2W53_038775	G2W53_038776	1.56136
G2W53_038777	G2W53_038778	2.13024
G2W53_038800	G2W53_038801	0.261767
G2W53_038801	G2W53_038802	0.157554
G2W53_038802	G2W53_038803	0.605889
G2W53_038814	G2W53_038815	0.0314548
G2W53_038850	G2W53_038851	0.195889
G2W53_038853	G2W53_038854	0.3546
G2W53_038856	G2W53_038857	0.621322
G2W53_038916	G2W53_038917	0.309077
G2W53_038950	G2W53_038951	0.382913
G2W53_038951	G2W53_038952	0.249028
G2W53_038969	G2W53_038970	0.800209
G2W53_038983	G2W53_038984	0.116168
G2W53_038995	G2W53_038996	0.329721
G2W53_039031	G2W53_039032	0.0224316
G2W53_039105	G2W53_039106	0.574561
G2W53_039109	G2W53_039110	0.234444
G2W53_039110	G2W53_039111	0.197325
G2W53_039115	G2W53_039116	0.222549
G2W53_039116	G2W53_039117	0.201637
G2W53_039209	G2W53_039210	0.133049
G2W53_039210	G2W53_039211	0.0925673
G2W53_039213	G2W53_039214	0.915306
G2W53_039235	G2W53_039236	0.280135
G2W53_039654	G2W53_039655	0.361689
G2W53_039707	G2W53_039708	0.186644
G2W53_039719	G2W53_039720	0.183825
G2W53_039741	G2W53_039742	0.131066
G2W53_039758	G2W53_039759	0.228956
G2W53_039908	G2W53_039909	0.0695686
G2W53_039932	G2W53_039933	0.0584237
G2W53_039938	G2W53_039939	0.428281
G2W53_039963	G2W53_039964	0
G2W53_039985	G2W53_039986	0.518455
G2W53_039986	G2W53_039987	0.888939
G2W53_040021	G2W53_040022	0.196921
G2W53_040143	G2W53_040144	0.345747
G2W53_040170	G2W53_040171	0.324753
G2W53_040177	G2W53_040178	0
G2W53_040178	G2W53_040179	0
G2W53_040179	G2W53_040180	0
G2W53_040375	G2W53_040376	0.361119
G2W53_040398	G2W53_040399	0.539698
G2W53_040442	G2W53_040443	1.7297
G2W53_040452	G2W53_040453	0.267998
G2W53_040453	G2W53_040454	0.208224
G2W53_040486	G2W53_040487	0.788525
G2W53_040545	G2W53_040546	1.56711
G2W53_040821	G2W53_040822	0.0823669
G2W53_040828	G2W53_040829	2.62238
G2W53_040830	G2W53_040831	0.0598822
G2W53_041326	G2W53_041327	0.8321
G2W53_041574	G2W53_041575	0.952878
G2W53_041663	G2W53_041664	0.0150136
G2W53_041740	G2W53_041741	0.233532
G2W53_041741	G2W53_041742	0.21843
G2W53_041742	G2W53_041743	0.113532
G2W53_041782	G2W53_041783	0.800917
G2W53_041799	G2W53_041800	0.163754
G2W53_041848	G2W53_041849	0.499808
G2W53_041851	G2W53_041852	0.369971
G2W53_041946	G2W53_041947	0
G2W53_041947	G2W53_041948	0.208291
G2W53_042011	G2W53_042012	0.0540775
G2W53_042013	G2W53_042014	0.0311105
G2W53_042113	G2W53_042114	0.0568407
G2W53_042116	G2W53_042117	0.147715
G2W53_042144	G2W53_042145	2.27641
G2W53_042181	G2W53_042182	0.514765
G2W53_042210	G2W53_042211	NaN
G2W53_042224	G2W53_042225	0.663879
G2W53_042225	G2W53_042226	0.297082
G2W53_042344	G2W53_042345	0.316823
G2W53_042356	G2W53_042357	1.69758
G2W53_042373	G2W53_042374	0.0447077
G2W53_042376	G2W53_042377	0.195701
G2W53_042421	G2W53_042422	NaN
G2W53_042431	G2W53_042432	1.04395
G2W53_042432	G2W53_042433	1.04509
G2W53_042457	G2W53_042458	0.804295
G2W53_042467	G2W53_042468	3.21326
G2W53_042486	G2W53_042487	0.0574694
G2W53_042497	G2W53_042498	0.188331
G2W53_042502	G2W53_042503	0.114815
G2W53_042504	G2W53_042505	0.313745
G2W53_042506	G2W53_042507	0.202615
G2W53_042541	G2W53_042542	NaN
G2W53_042579	G2W53_042580	0.102455
G2W53_042599	G2W53_042600	0.978691
G2W53_042609	G2W53_042610	0.462281
G2W53_042610	G2W53_042611	NaN
G2W53_042617	G2W53_042618	NaN
G2W53_042641	G2W53_042642	3.15088
G2W53_042642	G2W53_042643	0.635616
G2W53_042643	G2W53_042644	0.465989
G2W53_042781	G2W53_042782	2.00086
G2W53_042782	G2W53_042783	1.80291
G2W53_042783	G2W53_042784	1.27567
G2W53_042790	G2W53_042791	0.216804
G2W53_042840	G2W53_042841	0.28262
G2W53_042841	G2W53_042842	0.542218
G2W53_042842	G2W53_042843	0.391642
G2W53_042843	G2W53_042844	0.561326
G2W53_042849	G2W53_042850	0.116061
G2W53_042858	G2W53_042859	0.077768
G2W53_042859	G2W53_042860	0.102788
G2W53_042860	G2W53_042861	0.842863
G2W53_042861	G2W53_042862	0.0893073
G2W53_042870	G2W53_042871	0.294894
G2W53_042871	G2W53_042872	0.421043
G2W53_042894	G2W53_042895	0.043074
G2W53_042959	G2W53_042960	0.0861602
G2W53_042966	G2W53_042967	0.923235
G2W53_042985	G2W53_042986	0.0833205
G2W53_043009	G2W53_043010	0.189988
G2W53_043018	G2W53_043019	1.42002
G2W53_043028	G2W53_043029	0.747259
G2W53_043029	G2W53_043030	0.287431
G2W53_043037	G2W53_043038	1.04877
G2W53_043152	G2W53_043153	2.40377
G2W53_043233	G2W53_043234	1.11207
G2W53_043243	G2W53_043244	1.79863
G2W53_043258	G2W53_043259	NaN
G2W53_043347	G2W53_043348	0.739695
G2W53_043370	G2W53_043371	0.93619
G2W53_043458	G2W53_043459	0
G2W53_043472	G2W53_043473	0.145014
G2W53_043498	G2W53_043499	1.23834
G2W53_043672	G2W53_043673	1.35456
G2W53_043690	G2W53_043691	1.24344
G2W53_043691	G2W53_043692	0.947733
G2W53_043721	G2W53_043722	NaN
G2W53_043758	G2W53_043759	0.733353
G2W53_043766	G2W53_043767	0.0213024
G2W53_043767	G2W53_043768	0.236035
G2W53_043776	G2W53_043777	0.634845
G2W53_043778	G2W53_043779	1.31365
G2W53_043779	G2W53_043780	0.452651
G2W53_043784	G2W53_043785	0.453078
G2W53_043806	G2W53_043807	0.503209
G2W53_043963	G2W53_043964	0.273318
G2W53_043966	G2W53_043967	0.388241
G2W53_044038	G2W53_044039	0.322983
G2W53_044079	G2W53_044080	2.0443
G2W53_044178	G2W53_044179	1.34083
G2W53_044359	G2W53_044360	1.53194
G2W53_044533	G2W53_044534	0
G2W53_044603	G2W53_044604	0.218007
G2W53_044639	G2W53_044640	0.791799
G2W53_044689	G2W53_044690	0.0592716
G2W53_045012	G2W53_045013	0.284695
G2W53_045014	G2W53_045015	0.502953
G2W53_045017	G2W53_045018	0.45058
G2W53_045180	G2W53_045181	0.117063
G2W53_045225	G2W53_045226	0.0961314

## Sheet: Supplementary Table S3
Supplementary Table S3. KEGG pathway enrichment analysis of TDGs in Senna tora genome.
	KEGG_A_class	KEGG_B_class (Category)	Pathway	Out (986)	All (10,398)	Rich factor	P-value	Padj	Pathway ID	Genes	K_IDs
Significant	Metabolism	Biosynthesis of other secondary metabolites	Flavonoid biosynthesis	51	142	0.359155	1.60996e-19	1.93195e-17	ko00941	G2W53_005496;G2W53_005497;G2W53_005823;G2W53_005824;G2W53_005825;G2W53_011257;G2W53_011258;G2W53_011259;G2W53_011260;G2W53_011261;G2W53_011263;G2W53_011981;G2W53_013947;G2W53_016051;G2W53_016160;G2W53_016161;G2W53_016883;G2W53_016884;G2W53_016886;G2W53_016887;G2W53_019026;G2W53_022815;G2W53_022816;G2W53_022821;G2W53_022822;G2W53_022823;G2W53_022824;G2W53_022825;G2W53_022826;G2W53_022827;G2W53_022…	K00660+K00660+K00660+K00660+K00660+K22845+K22845+K22845+K22845+K22845+K22845+K13082+K08243+K08695+K13065+K13065+K13065+K13065+K13065+K13065+K13081+K00660+K00660+K00660+K00660+K00660+K00660+K00660+K00660+K00660+K00660+K00660+K00660+K00660+K00660+K00660+K13065+K13065+K13065+K05278+K05278+K05278+K01859+K05280+K05280+K22845+K13082+K13082+K08243+K13083+K13083+K13081+K01859	K00660+K00660+K00660+K00660+K00660+K22845+K22845+K22845+K22845+K22845+K22845+K13082+K08243+K08695+K13065+K13065+K13065+K13065+K13065+K13065+K13081+K00660+K00660+K00660+K00660+K00660+K00660+K00660+K00660+K00660+K00660+K00660+K00660+K00660+K00660+K00660+K13065+K13065+K13065+K05278+K05278+K05278+K01859+K05280+K05280+K22845+K13082+K13082+K08243+K13083+K13083+K13081+K01859
	Metabolism	Biosynthesis of other secondary metabolites	Indole alkaloid biosynthesis	14	22	0.636364	6.73184e-10	2.69274e-08	ko00901	G2W53_002322;G2W53_002323;G2W53_016745;G2W53_016746;G2W53_016747;G2W53_016751;G2W53_016752;G2W53_032333;G2W53_032334;G2W53_032336;G2W53_032337;G2W53_032338;G2W53_032339;G2W53_032340	K01593+K01593+K01593+K01593+K01593+K01593+K01593+K01593+K01593+K01593+K01593+K01593+K01593+K01593	K01593+K01593+K01593+K01593+K01593+K01593+K01593+K01593+K01593+K01593+K01593+K01593+K01593+K01593
	Metabolism	Biosynthesis of other secondary metabolites	Isoflavonoid biosynthesis	21	38	0.552632	1.4881e-08	2.97621e-07	ko00943	G2W53_005743;G2W53_005744;G2W53_017166;G2W53_017167;G2W53_017168;G2W53_019826;G2W53_019827;G2W53_019829;G2W53_019830;G2W53_019832;G2W53_019833;G2W53_019835;G2W53_019836;G2W53_021205;G2W53_021206;G2W53_034143;G2W53_034144;G2W53_034149;G2W53_034150;G2W53_038042;G2W53_038043	K13258+K13258+K13265+K13265+K13265+K13260+K13260+K13260+K13260+K13258+K13264+K13264+K13264+K13264+K13264+K13264+K13264	K13258+K13258+K13265+K13265+K13265+K13260+K13260+K13260+K13260+K13258+K13264+K13264+K13264+K13264+K13264+K13264+K13264
	Metabolism	Biosynthesis of other secondary metabolites	Isoquinoline alkaloid biosynthesis	21	66	0.318182	3.71416e-07	4.95221e-06	ko00950	G2W53_002322;G2W53_002323;G2W53_005762;G2W53_005763;G2W53_016745;G2W53_016746;G2W53_016747;G2W53_016751;G2W53_016752;G2W53_032333;G2W53_032334;G2W53_032336;G2W53_032337;G2W53_032338;G2W53_032339;G2W53_032340;G2W53_038124;G2W53_038125;G2W53_042609;G2W53_042610;G2W53_042611	K01593+K01593+K00276+K00276+K01593+K01593+K01593+K01593+K01593+K01593+K01593+K01593+K01593+K01593+K01593+K01593+K00815+K00815+K00422+K00422+K00422	K01593+K01593+K00276+K00276+K01593+K01593+K01593+K01593+K01593+K01593+K01593+K01593+K01593+K01593+K01593+K01593+K00815+K00815+K00422+K00422+K00422
	Metabolism	Biosynthesis of other secondary metabolites	Flavone and flavonol biosynthesis	20	63	0.31746	3.28855e-06	3.58751e-05	ko00944	G2W53_003502;G2W53_003503;G2W53_025390;G2W53_025391;G2W53_025393;G2W53_025394;G2W53_038410;G2W53_038411;G2W53_042486;G2W53_015922;G2W53_015923;G2W53_021205;G2W53_021206;G2W53_034143;G2W53_034144;G2W53_034149;G2W53_034150;G2W53_038042;G2W53_038043;G2W53_042487	K22794+K22794+K22794+K22794+K22794+K22794+K05280+K05280+K22794+K13083+K13083+K13264+K13264+K13264+K13264+K13264+K13264+K13264+K22794	K22794+K22794+K22794+K22794+K22794+K22794+K05280+K05280+K22794+K13083+K13083+K13264+K13264+K13264+K13264+K13264+K13264+K13264+K22794
	Metabolism	Biosynthesis of other secondary metabolites	Stilbenoid, diarylheptanoid and gingerol biosynthesis	17	56	0.303571	9.74997e-06	8.99997e-05	ko00945	G2W53_000412;G2W53_000413;G2W53_008804;G2W53_008805;G2W53_016160;G2W53_016161;G2W53_016883;G2W53_016884;G2W53_016886;G2W53_016887;G2W53_021090;G2W53_021091;G2W53_021159;G2W53_021160;G2W53_024723;G2W53_024724;G2W53_024725	K16040+K16040+K16040+K16040+K13065+K13065+K13065+K13065+K13065+K13065+K16040+K16040+K16040+K16040+K13065+K13065+K13065	K16040+K16040+K16040+K16040+K13065+K13065+K13065+K13065+K13065+K13065+K16040+K16040+K16040+K16040+K13065+K13065+K13065
	Metabolism	Biosynthesis of other secondary metabolites	Phenylpropanoid biosynthesis	71	503	0.141153	7.51019e-05	0.000530131	ko00940	G2W53_000116;G2W53_000117;G2W53_000118;G2W53_000662;G2W53_000665;G2W53_000666;G2W53_000668;G2W53_000669;G2W53_000748;G2W53_000749;G2W53_001735;G2W53_001746;G2W53_001747;G2W53_002949;G2W53_002950;G2W53_004700;G2W53_004701;G2W53_004705;G2W53_004706;G2W53_004902;G2W53_007082;G2W53_007083;G2W53_008817;G2W53_008818;G2W53_008820;G2W53_008821;G2W53_013225;G2W53_013226;G2W53_013750;G2W53_013751;G2W53_016…	K09753+K09753+K09753+K13066+K13066+K13066+K13066+K13066+K13066+K13066+K01188+K12356+K12356+K01188+K05350+K22395+K22395+K22395+K22395+K00430+K05350+K05350+K01188+K01188+K01188+K01188+K13066+K00430+K00430+K01188+K09753+K09753+K09753+K09753+K09753+K09753+K05349+K13065+K13065+K13065+K13065+K13065+K13065+K00083+K00083+K00083+K00430+K13065+K13065+K13065+K13066+K13066+K01188+K00430+K00430+K00430+K00430+…	K09753+K09753+K09753+K13066+K13066+K13066+K13066+K13066+K13066+K13066+K01188+K12356+K12356+K01188+K05350+K22395+K22395+K22395+K22395+K00430+K05350+K05350+K01188+K01188+K01188+K01188+K13066+K00430+K00430+K01188+K09753+K09753+K09753+K09753+K09753+K09753+K05349+K13065+K13065+K13065+K13065+K13065+K13065+K00083+K00083+K00083+K00430+K13065+K13065+K13065+K13066+K13066+K01188+K00430+K00430+K00430+K00430+…
	Metabolism	Biosynthesis of other secondary metabolites	Betalain biosynthesis	15	62	0.241935	0.000529213	0.00352809	ko00965	G2W53_002322;G2W53_002323;G2W53_016745;G2W53_016746;G2W53_016747;G2W53_016751;G2W53_016752;G2W53_031691;G2W53_032333;G2W53_032334;G2W53_032336;G2W53_032337;G2W53_032338;G2W53_032339;G2W53_032340	K01593+K01593+K01593+K01593+K01593+K01593+K01593+K15777+K01593+K01593+K01593+K01593+K01593+K01593+K01593	K01593+K01593+K01593+K01593+K01593+K01593+K01593+K15777+K01593+K01593+K01593+K01593+K01593+K01593+K01593
	Metabolism	Amino acid metabolism	Tryptophan metabolism	34	124	0.274194	7.44459e-09	1.7867e-07	ko00380	G2W53_002322;G2W53_002323;G2W53_005463;G2W53_005464;G2W53_006299;G2W53_006300;G2W53_008584;G2W53_008585;G2W53_016745;G2W53_016746;G2W53_016747;G2W53_016751;G2W53_016752;G2W53_028765;G2W53_029468;G2W53_029469;G2W53_029470;G2W53_029471;G2W53_032054;G2W53_032333;G2W53_032334;G2W53_032336;G2W53_032337;G2W53_032338;G2W53_032339;G2W53_032340;G2W53_042497;G2W53_042498;G2W53_042502;G2W53_042503;G2W53_042…	K01593+K01593+K22588+K22588+K00128+K00128+K11816+K11816+K01593+K01593+K01593+K01593+K01593+K01426+K22588+K22588+K22588+K22588+K07409+K01593+K01593+K01593+K01593+K01593+K01593+K01593+K22588+K22588+K22588+K22588+K22588+K22588+K22588+K22588	K01593+K01593+K22588+K22588+K00128+K00128+K11816+K11816+K01593+K01593+K01593+K01593+K01593+K01426+K22588+K22588+K22588+K22588+K07409+K01593+K01593+K01593+K01593+K01593+K01593+K01593+K22588+K22588+K22588+K22588+K22588+K22588+K22588+K22588
	Metabolism	Amino acid metabolism	Tyrosine metabolism	29	95	0.305263	6.65781e-09	1.7867e-07	ko00350	G2W53_002167;G2W53_002168;G2W53_002322;G2W53_002323;G2W53_005141;G2W53_005142;G2W53_005762;G2W53_005763;G2W53_016649;G2W53_016650;G2W53_016745;G2W53_016746;G2W53_016747;G2W53_016751;G2W53_016752;G2W53_032333;G2W53_032334;G2W53_032336;G2W53_032337;G2W53_032338;G2W53_032339;G2W53_032340;G2W53_038124;G2W53_038125;G2W53_042609;G2W53_042610;G2W53_042611;G2W53_011396;G2W53_011397	K07253+K07253+K01593+K01593+K01800+K01800+K00276+K00276+K07253+K07253+K01593+K01593+K01593+K01593+K01593+K01593+K01593+K01593+K01593+K01593+K01593+K01593+K00815+K00815+K00422+K00422+K00422+K00121+K00121	K07253+K07253+K01593+K01593+K01800+K01800+K00276+K00276+K07253+K07253+K01593+K01593+K01593+K01593+K01593+K01593+K01593+K01593+K01593+K01593+K01593+K01593+K00815+K00815+K00422+K00422+K00422+K00121+K00121
	Metabolism	Amino acid metabolism	Phenylalanine metabolism	23	94	0.244681	1.58935e-05	0.000127148	ko00360	G2W53_002167;G2W53_002168;G2W53_002322;G2W53_002323;G2W53_005762;G2W53_005763;G2W53_016649;G2W53_016650;G2W53_016745;G2W53_016746;G2W53_016747;G2W53_016751;G2W53_016752;G2W53_028765;G2W53_032333;G2W53_032334;G2W53_032336;G2W53_032337;G2W53_032338;G2W53_032339;G2W53_032340;G2W53_038124;G2W53_038125	K07253+K07253+K01593+K01593+K00276+K00276+K07253+K07253+K01593+K01593+K01593+K01593+K01593+K01426+K01593+K01593+K01593+K01593+K01593+K01593+K01593+K00815+K00815	K07253+K07253+K01593+K01593+K00276+K00276+K07253+K07253+K01593+K01593+K01593+K01593+K01593+K01426+K01593+K01593+K01593+K01593+K01593+K01593+K01593+K00815+K00815
	Metabolism	Metabolism of terpenoids and polyketides	Zeatin biosynthesis	20	59	0.338983	2.19356e-07	3.29034e-06	ko00908	G2W53_003108;G2W53_003109;G2W53_006377;G2W53_024144;G2W53_024145;G2W53_024146;G2W53_030131;G2W53_031972;G2W53_031979;G2W53_031982;G2W53_031983;G2W53_031984;G2W53_035739;G2W53_035740;G2W53_035741;G2W53_035742;G2W53_043498;G2W53_043499;G2W53_006378;G2W53_020322	K13496+K13496+K00279+K13496+K13496+K13496+K13496+K13496+K13496+K13496+K13496+K13496+K13496+K13496+K13496+K13496+K13496+K13496+K00279+K13496	K13496+K13496+K00279+K13496+K13496+K13496+K13496+K13496+K13496+K13496+K13496+K13496+K13496+K13496+K13496+K13496+K13496+K13496+K00279+K13496
	Metabolism	Metabolism of terpenoids and polyketides	Sesquiterpenoid and triterpenoid biosynthesis	15	49	0.306122	2.89847e-05	0.000217385	ko00909	G2W53_001724;G2W53_001725;G2W53_010850;G2W53_010851;G2W53_010852;G2W53_020978;G2W53_020979;G2W53_020980;G2W53_020987;G2W53_020988;G2W53_020989;G2W53_029942;G2W53_031813;G2W53_031814;G2W53_001723	K15813+K15813+K15814+K15814+K15814+K15803+K15803+K15803+K15803+K15803+K15803+K15813+K00801+K00801+K15813	K15813+K15813+K15814+K15814+K15814+K15803+K15803+K15803+K15803+K15803+K15803+K15813+K00801+K00801+K15813
	Metabolism	Global and overview maps	Biosynthesis of secondary metabolites	332	2622	0.126621	6.24006e-11	3.74403e-09	ko01110	G2W53_000116;G2W53_000117;G2W53_000118;G2W53_000206;G2W53_000207;G2W53_000208;G2W53_000662;G2W53_000665;G2W53_000666;G2W53_000668;G2W53_000669;G2W53_000737;G2W53_000738;G2W53_000748;G2W53_000749;G2W53_001683;G2W53_001724;G2W53_001725;G2W53_001735;G2W53_002322;G2W53_002323;G2W53_002449;G2W53_002677;G2W53_002839;G2W53_002840;G2W53_002881;G2W53_002882;G2W53_002949;G2W53_003107;G2W53_003108;G2W53_003…	K09753+K09753+K09753+K04124+K04124+K05282+K13066+K13066+K13066+K13066+K13066+K12153+K12153+K13066+K13066+K14423+K15813+K15813+K01188+K01593+K01593+K00901+K00514+K10047+K10047+K00895+K00895+K01188+K05350+K14595+K13496+K13496+K14595+K14595+K01187+K01187+K22395+K22395+K22395+K22395+K00430+K00847+K00134+K00134+K15405+K00660+K00660+K13258+K13258+K00276+K00276+K00660+K00660+K00660+K00128+K00128+K03787+…	K09753+K09753+K09753+K04124+K04124+K05282+K13066+K13066+K13066+K13066+K13066+K12153+K12153+K13066+K13066+K14423+K15813+K15813+K01188+K01593+K01593+K00901+K00514+K10047+K10047+K00895+K00895+K01188+K05350+K14595+K13496+K13496+K14595+K14595+K01187+K01187+K22395+K22395+K22395+K22395+K00430+K00847+K00134+K00134+K15405+K00660+K00660+K13258+K13258+K00276+K00276+K00660+K00660+K00660+K00128+K00128+K03787+…
	Metabolism	Global and overview maps	Metabolic pathways	484	4498	0.107603	1.12349e-05	9.62993e-05	ko01100	G2W53_000046;G2W53_000047;G2W53_000116;G2W53_000117;G2W53_000118;G2W53_000206;G2W53_000207;G2W53_000208;G2W53_000406;G2W53_000538;G2W53_000539;G2W53_000662;G2W53_000665;G2W53_000666;G2W53_000668;G2W53_000669;G2W53_000737;G2W53_000738;G2W53_000748;G2W53_000749;G2W53_001683;G2W53_001730;G2W53_001731;G2W53_001735;G2W53_001778;G2W53_001779;G2W53_001881;G2W53_001882;G2W53_002167;G2W53_002168;G2W53_002…	K02135+K02135+K09753+K09753+K09753+K04124+K04124+K05282+K00799+K20547+K20547+K13066+K13066+K13066+K13066+K13066+K12153+K12153+K13066+K13066+K14423+K01051+K01051+K01188+K19355+K19355+K01179+K01179+K07253+K07253+K01593+K01593+K00901+K01183+K01183+K00514+K01969+K08912+K08912+K00512+K00512+K00512+K10047+K10047+K00895+K00895+K01728+K01728+K01188+K01229+K05350+K01051+K01051+K14595+K14595+K14595+K02433+…	K02135+K02135+K09753+K09753+K09753+K04124+K04124+K05282+K00799+K20547+K20547+K13066+K13066+K13066+K13066+K13066+K12153+K12153+K13066+K13066+K14423+K01051+K01051+K01188+K19355+K19355+K01179+K01179+K07253+K07253+K01593+K01593+K00901+K01183+K01183+K00514+K01969+K08912+K08912+K00512+K00512+K00512+K10047+K10047+K00895+K00895+K01728+K01728+K01188+K01229+K05350+K01051+K01051+K14595+K14595+K14595+K02433+…
	Organismal Systems	Environmental adaptation	Plant-pathogen interaction	101	633	0.159558	7.0544e-08	1.20933e-06	ko04626	G2W53_001889;G2W53_001890;G2W53_002199;G2W53_002209;G2W53_002450;G2W53_002675;G2W53_002676;G2W53_002678;G2W53_002735;G2W53_002736;G2W53_002737;G2W53_002738;G2W53_002742;G2W53_002743;G2W53_004611;G2W53_004612;G2W53_004868;G2W53_004869;G2W53_004873;G2W53_004874;G2W53_004994;G2W53_004995;G2W53_005105;G2W53_005108;G2W53_005111;G2W53_005112;G2W53_005374;G2W53_005375;G2W53_008828;G2W53_008829;G2W53_011…	K13459+K13459+K13466+K13420+K13459+K13459+K13459+K13459+K13459+K13459+K13459+K13459+K13459+K13459+K13459+K13459+K13459+K13459+K13459+K13459+K13465+K13465+K18875+K13459+K13459+K13459+K13449+K13449+K13448+K13448+K13459+K13459+K18834+K02183+K02183+K02183+K02183+K13459+K13459+K13459+K13466+K13466+K13420+K13420+K13420+K13420+K13420+K15397+K15397+K15397+K15397+K02183+K02183+K13459+K13459+K13466+K13466+…	K13459+K13459+K13466+K13420+K13459+K13459+K13459+K13459+K13459+K13459+K13459+K13459+K13459+K13459+K13459+K13459+K13459+K13459+K13459+K13459+K13465+K13465+K18875+K13459+K13459+K13459+K13449+K13449+K13448+K13448+K13459+K13459+K18834+K02183+K02183+K02183+K02183+K13459+K13459+K13459+K13466+K13466+K13420+K13420+K13420+K13420+K13420+K15397+K15397+K15397+K15397+K02183+K02183+K13459+K13459+K13466+K13466+…
	Metabolism	Lipid metabolism	Cutin, suberine and wax biosynthesis	22	80	0.275	3.13903e-06	3.58751e-05	ko00073	G2W53_005152;G2W53_008882;G2W53_008883;G2W53_010769;G2W53_010770;G2W53_010786;G2W53_010787;G2W53_017145;G2W53_017146;G2W53_021118;G2W53_021119;G2W53_021120;G2W53_021395;G2W53_021396;G2W53_025143;G2W53_025144;G2W53_042373;G2W53_042377;G2W53_043779;G2W53_043780;G2W53_042374;G2W53_042376	K15405+K15400+K15400+K13356+K13356+K13356+K13356+K20495+K20495+K15406+K15406+K15406+K13356+K13356+K15406+K15406+K15405+K15405+K13407+K13407+K15405+K15405	K15405+K15400+K15400+K13356+K13356+K13356+K13356+K20495+K20495+K15406+K15406+K15406+K13356+K13356+K15406+K15406+K15405+K15405+K13407+K13407+K15405+K15405
	Genetic Information Processing	Transcription	RNA polymerase	33	151	0.218543	3.68301e-06	3.68301e-05	ko03020	G2W53_001561;G2W53_003087;G2W53_003089;G2W53_003090;G2W53_003091;G2W53_003092;G2W53_003093;G2W53_003094;G2W53_003095;G2W53_005961;G2W53_005962;G2W53_011387;G2W53_021017;G2W53_021018;G2W53_029304;G2W53_029699;G2W53_029700;G2W53_029702;G2W53_029703;G2W53_029712;G2W53_029713;G2W53_029714;G2W53_029715;G2W53_029716;G2W53_029717;G2W53_029718;G2W53_031989;G2W53_034171;G2W53_034750;G2W53_042144;G2W53_042…	K03006+K03011+K03011+K03011+K03011+K03011+K03011+K03011+K03011+K03006+K03006+K03025+K03021+K03021+K03021+K03021+K03021+K03021+K03021+K03021+K03021+K03021+K03021+K03021+K03021+K03021+K03006+K03021+K03006+K03006+K03006+K03021+K03011	K03006+K03011+K03011+K03011+K03011+K03011+K03011+K03011+K03011+K03006+K03006+K03025+K03021+K03021+K03021+K03021+K03021+K03021+K03021+K03021+K03021+K03021+K03021+K03021+K03021+K03021+K03006+K03021+K03006+K03006+K03006+K03021+K03011
	Environmental Information Processing	Membrane transport	ABC transporters	30	170	0.176471	0.000599693	0.00378753	ko02010	G2W53_000204;G2W53_000205;G2W53_000368;G2W53_000369;G2W53_002093;G2W53_005290;G2W53_005291;G2W53_007027;G2W53_007028;G2W53_017102;G2W53_017103;G2W53_020263;G2W53_020264;G2W53_028293;G2W53_028294;G2W53_028295;G2W53_030384;G2W53_030385;G2W53_030386;G2W53_030387;G2W53_030388;G2W53_030389;G2W53_032373;G2W53_032374;G2W53_035203;G2W53_035204;G2W53_042859;G2W53_042860;G2W53_042861;G2W53_042862	K05681+K05681+K05665+K05665+K05681+K05681+K05681+K05657+K05657+K05666+K05666+K05681+K05681+K05681+K05681+K05681+K05658+K05658+K05658+K05658+K05658+K05658+K05681+K05681+K05658+K05658+K05681+K05681+K05681+K05681	K05681+K05681+K05665+K05665+K05681+K05681+K05681+K05657+K05657+K05666+K05666+K05681+K05681+K05681+K05681+K05681+K05658+K05658+K05658+K05658+K05658+K05658+K05681+K05681+K05658+K05658+K05681+K05681+K05681+K05681
Non significant	Metabolism	Metabolism of terpenoids and polyketides	Carotenoid biosynthesis	15	85	0.176471	0.0131058	0.0786347	ko00906	G2W53_002677;G2W53_003107;G2W53_003114;G2W53_003115;G2W53_022673;G2W53_022674;G2W53_022677;G2W53_022678;G2W53_022679;G2W53_031978;G2W53_031980;G2W53_043370;G2W53_043371;G2W53_003110;G2W53_031971	K00514+K14595+K14595+K14595+K09841+K09841+K09841+K09841+K09841+K14595+K14595+K09841+K09841+K14595+K14595
	Metabolism	Metabolism of terpenoids and polyketides	Brassinosteroid biosynthesis	8	35	0.228571	0.0147294	0.0841681	ko00905	G2W53_027992;G2W53_027993;G2W53_027997;G2W53_027998;G2W53_027999;G2W53_028000;G2W53_031533;G2W53_031534	K20623+K20623+K20623+K20623+K20623+K20623+K15639+K15639
	Metabolism	Carbohydrate metabolism	Pentose and glucuronate interconversions	36	274	0.131387	0.0272901	0.148855	ko00040	G2W53_001730;G2W53_001731;G2W53_002899;G2W53_002900;G2W53_002957;G2W53_002958;G2W53_003370;G2W53_003371;G2W53_005520;G2W53_005521;G2W53_005880;G2W53_005881;G2W53_008063;G2W53_011223;G2W53_011224;G2W53_016538;G2W53_016539;G2W53_016786;G2W53_021927;G2W53_023036;G2W53_023037;G2W53_023581;G2W53_023582;G2W53_025132;G2W53_025133;G2W53_027933;G2W53_027934;G2W53_028527;G2W53_028528;G2W53_034493;G2W53_034…	K01051+K01051+K01728+K01728+K01051+K01051+K00011+K00011+K01184+K01184+K01051+K01051+K12447+K01051+K01051+K01051+K01051+K00002+K01051+K01051+K01051+K01051+K01051+K01728+K01728+K01051+K01051+K01051+K01051+K01213+K01213+K01051+K01051+K00002+K01051+K01051
	Metabolism	Biosynthesis of other secondary metabolites	Tropane, piperidine and pyridine alkaloid biosynthesis	11	62	0.177419	0.0298983	0.155991	ko00960	G2W53_005762;G2W53_005763;G2W53_016792;G2W53_016793;G2W53_016794;G2W53_016796;G2W53_016797;G2W53_016799;G2W53_016800;G2W53_038124;G2W53_038125	K00276+K00276+K08081+K08081+K08081+K08081+K08081+K08081+K08081+K00815+K00815
	Metabolism	Biosynthesis of other secondary metabolites	Biosynthesis of various secondary metabolites - part 2	2	4	0.5	0.0473408	0.233423	ko00998	G2W53_020324;G2W53_020325	K21568+K21568
	Environmental Information Processing	Signal transduction	Phosphatidylinositol signaling system	19	134	0.141791	0.0486298	0.233423	ko04070	G2W53_002449;G2W53_002839;G2W53_002840;G2W53_012965;G2W53_012966;G2W53_012967;G2W53_012968;G2W53_013281;G2W53_017292;G2W53_017293;G2W53_020464;G2W53_020465;G2W53_030074;G2W53_030075;G2W53_032082;G2W53_036227;G2W53_044689;G2W53_044690;G2W53_013280	K00901+K10047+K10047+K02183+K02183+K02183+K02183+K05857+K01092+K01092+K02183+K02183+K05857+K05857+K00913+K00913+K00913+K00913+K05857
	Metabolism	Metabolism of other amino acids	Cyanoamino acid metabolism	37	318	0.116352	0.056183	0.259306	ko00460	G2W53_000737;G2W53_000738;G2W53_001735;G2W53_002949;G2W53_007082;G2W53_007083;G2W53_008817;G2W53_008818;G2W53_008820;G2W53_008821;G2W53_013750;G2W53_016083;G2W53_019797;G2W53_019798;G2W53_030202;G2W53_030203;G2W53_030204;G2W53_030206;G2W53_030207;G2W53_035794;G2W53_037525;G2W53_037526;G2W53_037528;G2W53_037529;G2W53_042840;G2W53_042841;G2W53_042842;G2W53_042843;G2W53_042844;G2W53_042849;G2W53_042…	K12153+K12153+K01188+K01188+K05350+K05350+K05350+K01188+K01188+K01188+K01188+K01188+K05349+K01455+K01455+K01188+K12153+K12153+K12153+K12153+K12153+K01188+K01188+K01188+K01188+K01188+K22706+K22706+K22706+K22706+K22706+K22706+K22706+K01188+K01188+K01188+K05349+K01188+K01188
	Metabolism	Biosynthesis of other secondary metabolites	Glucosinolate biosynthesis	9	56	0.160714	0.0792732	0.340811	ko00966	G2W53_000737;G2W53_000738;G2W53_030202;G2W53_030203;G2W53_030204;G2W53_030206;G2W53_030207;G2W53_031374;G2W53_031375	K12153+K12153+K12153+K12153+K12153+K12153+K12153+K00826+K00826
	Metabolism	Metabolism of terpenoids and polyketides	Monoterpenoid biosynthesis	7	40	0.175	0.0795226	0.340811	ko00902	G2W53_011365;G2W53_011366;G2W53_011368;G2W53_036390;G2W53_036391;G2W53_036395;G2W53_036396	K07385+K07385+K07385+K15095+K15095+K15095+K15095
	Environmental Information Processing	Signal transduction	MAPK signaling pathway - plant	46	399	0.115288	0.0932897	0.386026	ko04016	G2W53_000055;G2W53_000538;G2W53_000539;G2W53_002207;G2W53_002209;G2W53_003372;G2W53_003373;G2W53_005374;G2W53_005375;G2W53_005967;G2W53_012965;G2W53_012966;G2W53_012967;G2W53_012968;G2W53_016679;G2W53_016896;G2W53_016897;G2W53_016899;G2W53_016901;G2W53_016902;G2W53_017262;G2W53_017263;G2W53_018811;G2W53_018812;G2W53_020189;G2W53_020190;G2W53_020464;G2W53_020465;G2W53_022862;G2W53_023872;G2W53_023…	K20718+K20547+K20547+K20718+K13420+K20557+K20557+K13449+K13449+K14516+K02183+K02183+K02183+K02183+K20718+K13420+K13420+K13420+K13420+K13420+K20772+K20772+K14497+K14497+K20547+K20547+K02183+K02183+K20718+K14516+K14516+K14514+K14514+K13424+K13424+K13420+K13414+K20718+K14516+K14516+K14514+K14514+K14514+K13420+K13420+K13420
	Metabolism	Lipid metabolism	Fatty acid biosynthesis	10	69	0.144928	0.11479	0.459159	ko00061	G2W53_008885;G2W53_012089;G2W53_012090;G2W53_018779;G2W53_018784;G2W53_018786;G2W53_018819;G2W53_018820;G2W53_035467;G2W53_035468	K09458+K03921+K03921+K10781+K10781+K10781+K10781+K10781+K10781+K10781
	Metabolism	Metabolism of cofactors and vitamins	Folate biosynthesis	7	48	0.145833	0.165461	0.620965	ko00790	G2W53_003370;G2W53_003371;G2W53_020752;G2W53_020753;G2W53_020754;G2W53_011545;G2W53_011546	K00011+K00011+K01307+K01307+K01307+K18482+K18482
	Metabolism	Carbohydrate metabolism	Ascorbate and aldarate metabolism	17	139	0.122302	0.165591	0.620965	ko00053	G2W53_002839;G2W53_002840;G2W53_006299;G2W53_006300;G2W53_008063;G2W53_029457;G2W53_029459;G2W53_029460;G2W53_029473;G2W53_029477;G2W53_029478;G2W53_032360;G2W53_042579;G2W53_029458;G2W53_029474;G2W53_042959;G2W53_042960	K10047+K10047+K00128+K00128+K12447+K00423+K00423+K00423+K00423+K00423+K00423+K08232+K00423+K00423+K00423+K00423+K00423
	Metabolism	Biosynthesis of other secondary metabolites	Benzoxazinoid biosynthesis	2	9	0.222222	0.207412	0.754226	ko00402	G2W53_005998;G2W53_005997	K13229+K13229
	Metabolism	Amino acid metabolism	Lysine biosynthesis	3	17	0.176471	0.214249	0.756174	ko00300	G2W53_017301;G2W53_017302;G2W53_017303	K00215+K00215+K00215
	Metabolism	Biosynthesis of other secondary metabolites	Monobactam biosynthesis	3	18	0.166667	0.240283	0.795006	ko00261	G2W53_017301;G2W53_017302;G2W53_017303	K00215+K00215+K00215
	Metabolism	Lipid metabolism	Steroid biosynthesis	6	45	0.133333	0.25125	0.795006	ko00100	G2W53_001683;G2W53_029941;G2W53_031813;G2W53_031814;G2W53_035847;G2W53_001682	K14423+K01853+K00801+K00801+K08242+K14423
	Metabolism	Carbohydrate metabolism	Fructose and mannose metabolism	12	102	0.117647	0.258332	0.795006	ko00051	G2W53_001778;G2W53_001779;G2W53_002881;G2W53_002882;G2W53_003370;G2W53_003371;G2W53_005019;G2W53_011356;G2W53_011357;G2W53_023085;G2W53_023086;G2W53_023087	K19355+K19355+K00895+K00895+K00011+K00011+K00847+K19355+K19355+K19355+K19355+K19355
	Metabolism	Metabolism of terpenoids and polyketides	Diterpenoid biosynthesis	8	64	0.125	0.258359	0.795006	ko00904	G2W53_000206;G2W53_000207;G2W53_000208;G2W53_038320;G2W53_038321;G2W53_038322;G2W53_043153;G2W53_019709	K04124+K04124+K05282+K04123+K04123+K04123+K05282+K04123
	Metabolism	Biosynthesis of other secondary metabolites	Anthocyanin biosynthesis	1	3	0.333333	0.258377	0.795006	ko00942	G2W53_021206	K21383
	Metabolism	Lipid metabolism	Arachidonic acid metabolism	5	39	0.128205	0.309136	0.927407	ko00590	G2W53_011451;G2W53_020698;G2W53_020701;G2W53_042599;G2W53_042600	K07425+K07425+K07425+K08726+K08726
	Metabolism	Amino acid metabolism	Histidine metabolism	4	31	0.129032	0.338305	0.990161	ko00340	G2W53_006299;G2W53_006300;G2W53_042791;G2W53_042790	K00128+K00128+K01590+K01590
	Metabolism	Carbohydrate metabolism	Starch and sucrose metabolism	53	552	0.0960145	0.367697	1	ko00500	G2W53_001735;G2W53_001881;G2W53_001882;G2W53_002949;G2W53_004684;G2W53_004685;G2W53_005019;G2W53_007082;G2W53_007083;G2W53_008364;G2W53_008365;G2W53_008817;G2W53_008818;G2W53_008820;G2W53_008821;G2W53_011578;G2W53_011579;G2W53_013750;G2W53_016083;G2W53_018486;G2W53_018487;G2W53_028761;G2W53_028762;G2W53_029553;G2W53_029554;G2W53_029562;G2W53_029563;G2W53_029564;G2W53_029565;G2W53_030912;G2W53_030…	K01188+K01179+K01179+K01188+K05350+K01187+K01187+K00847+K05350+K05350+K01179+K01179+K01188+K01188+K01188+K01188+K01210+K01210+K01188+K05349+K19891+K19893+K19891+K19892+K01188+K01210+K01210+K01210+K01210+K01210+K01210+K01210+K01210+K01210+K01210+K01210+K01188+K01188+K01188+K01188+K01188+K01187+K01187+K01187+K01188+K01188+K01177+K01177+K01188+K01193+K01193+K01193+K05349+K01188+K01188
	Metabolism	Lipid metabolism	Linoleic acid metabolism	7	62	0.112903	0.373069	1	ko00591	G2W53_000441;G2W53_000442;G2W53_000443;G2W53_001924;G2W53_032054;G2W53_037425;G2W53_001923	K15718+K15718+K15718+K15718+K07409+K15718+K15718
	Metabolism	Lipid metabolism	Fatty acid degradation	9	83	0.108434	0.388218	1	ko00071	G2W53_006299;G2W53_006300;G2W53_011451;G2W53_017145;G2W53_017146;G2W53_020698;G2W53_020701;G2W53_011396;G2W53_011397	K00128+K00128+K07425+K20495+K20495+K07425+K07425+K00121+K00121
	Metabolism	Metabolism of terpenoids and polyketides	Limonene and pinene degradation	2	14	0.142857	0.388617	1	ko00903	G2W53_006299;G2W53_006300	K00128+K00128
	Metabolism	Biosynthesis of other secondary metabolites	Caffeine metabolism	1	5	0.2	0.392401	1	ko00232	G2W53_032054	K07409
	Metabolism	Lipid metabolism	Glycerolipid metabolism	14	135	0.103704	0.403715	1	ko00561	G2W53_002449;G2W53_003370;G2W53_003371;G2W53_006299;G2W53_006300;G2W53_012229;G2W53_016786;G2W53_030391;G2W53_030392;G2W53_030393;G2W53_035578;G2W53_035579;G2W53_012230;G2W53_016787	K00901+K00011+K00011+K00128+K00128+K13508+K00002+K13508+K13508+K13508+K18693+K18693+K13508+K00002
	Organismal Systems	Environmental adaptation	Circadian rhythm - plant	21	218	0.0963303	0.411969	1	ko04712	G2W53_005496;G2W53_005497;G2W53_005823;G2W53_005824;G2W53_005825;G2W53_022815;G2W53_022816;G2W53_022821;G2W53_022822;G2W53_022823;G2W53_022824;G2W53_022825;G2W53_022826;G2W53_022827;G2W53_022830;G2W53_022831;G2W53_022832;G2W53_022837;G2W53_022838;G2W53_024767;G2W53_024766	K00660+K00660+K00660+K00660+K00660+K00660+K00660+K00660+K00660+K00660+K00660+K00660+K00660+K00660+K00660+K00660+K00660+K00660+K00660+K00660+K16223+K16223
	Metabolism	Carbohydrate metabolism	Galactose metabolism	17	167	0.101796	0.416629	1	ko00052	G2W53_002950;G2W53_003370;G2W53_003371;G2W53_004684;G2W53_004685;G2W53_008063;G2W53_008822;G2W53_031759;G2W53_031760;G2W53_037732;G2W53_043009;G2W53_043010;G2W53_043019;G2W53_012607;G2W53_012608;G2W53_013729;G2W53_037731	K01229+K00011+K00011+K01187+K01187+K12447+K01229+K12309+K12309+K12309+K01187+K01187+K01187+K01193+K01193+K01193+K12309
	Metabolism	Amino acid metabolism	Arginine biosynthesis	7	65	0.107692	0.421216	1	ko00220	G2W53_012348;G2W53_012349;G2W53_019730;G2W53_019731;G2W53_024026;G2W53_024027;G2W53_034384	K01755+K01755+K01438+K01438+K00145+K00145+K14677
	Metabolism	Glycan biosynthesis and metabolism	Glycosphingolipid biosynthesis - ganglio series	4	36	0.111111	0.449214	1	ko00604	G2W53_031759;G2W53_031760;G2W53_037732;G2W53_037731	K12309+K12309+K12309+K12309
	Metabolism	Energy metabolism	Photosynthesis - antenna proteins	2	16	0.125	0.456582	1	ko00196	G2W53_002733;G2W53_002734	K08912+K08912
	Metabolism	Carbohydrate metabolism	Inositol phosphate metabolism	12	122	0.0983607	0.491977	1	ko00562	G2W53_002839;G2W53_002840;G2W53_013281;G2W53_017292;G2W53_017293;G2W53_030074;G2W53_030075;G2W53_032082;G2W53_036227;G2W53_044689;G2W53_044690;G2W53_013280	K10047+K10047+K05857+K01092+K01092+K05857+K05857+K00913+K00913+K00913+K00913+K05857
	Metabolism	Lipid metabolism	Sphingolipid metabolism	8	82	0.097561	0.521276	1	ko00600	G2W53_027874;G2W53_027875;G2W53_031759;G2W53_031760;G2W53_037732;G2W53_042181;G2W53_042182;G2W53_037731	K04628+K04628+K12309+K12309+K12309+K04628+K04628+K12309
	Metabolism	Global and overview maps	Fatty acid metabolism	10	106	0.0943396	0.555712	1	ko01212	G2W53_008885;G2W53_012089;G2W53_012090;G2W53_018779;G2W53_018784;G2W53_018786;G2W53_018819;G2W53_018820;G2W53_035467;G2W53_035468	K09458+K03921+K03921+K10781+K10781+K10781+K10781+K10781+K10781+K10781
	Genetic Information Processing	Translation	Aminoacyl-tRNA biosynthesis	10	107	0.0934579	0.56804	1	ko00970	G2W53_003281;G2W53_003282;G2W53_019356;G2W53_019357;G2W53_024378;G2W53_024379;G2W53_029297;G2W53_037153;G2W53_037154;G2W53_037675	K02433+K02433+K01870+K01870+K01870+K01870+K01885+K01869+K01869+K01870
	Metabolism	Metabolism of other amino acids	Selenocompound metabolism	4	44	0.0909091	0.610847	1	ko00450	G2W53_020878;G2W53_022655;G2W53_025000;G2W53_025001	K00384+K00549+K00384+K00384
	Metabolism	Glycan biosynthesis and metabolism	Other glycan degradation	6	67	0.0895522	0.620112	1	ko00511	G2W53_024958;G2W53_024959;G2W53_031759;G2W53_031760;G2W53_037732;G2W53_037731	K01206+K01206+K12309+K12309+K12309+K12309
	Metabolism	Global and overview maps	2-Oxocarboxylic acid metabolism	14	156	0.0897436	0.626887	1	ko01210	G2W53_000737;G2W53_000738;G2W53_019730;G2W53_019731;G2W53_024026;G2W53_024027;G2W53_030202;G2W53_030203;G2W53_030204;G2W53_030206;G2W53_030207;G2W53_031374;G2W53_031375;G2W53_034384	K12153+K12153+K01438+K01438+K00145+K00145+K12153+K12153+K12153+K12153+K12153+K00826+K00826+K14677
	Metabolism	Energy metabolism	Nitrogen metabolism	4	45	0.0888889	0.628903	1	ko00910	G2W53_019797;G2W53_019798;G2W53_021508;G2W53_021509	K01455+K01455+K02575+K02575
	Metabolism	Glycan biosynthesis and metabolism	Glycosaminoglycan degradation	4	46	0.0869565	0.646413	1	ko00531	G2W53_031759;G2W53_031760;G2W53_037732;G2W53_037731	K12309+K12309+K12309+K12309
	Metabolism	Lipid metabolism	Ether lipid metabolism	4	46	0.0869565	0.646413	1	ko00565	G2W53_027874;G2W53_027875;G2W53_042181;G2W53_042182	K04628+K04628+K04628+K04628
	Metabolism	Carbohydrate metabolism	Amino sugar and nucleotide sugar metabolism	20	225	0.0888889	0.654446	1	ko00520	G2W53_000538;G2W53_000539;G2W53_002579;G2W53_002580;G2W53_005019;G2W53_005151;G2W53_008063;G2W53_008661;G2W53_008662;G2W53_020189;G2W53_020190;G2W53_028238;G2W53_028242;G2W53_028243;G2W53_028245;G2W53_028246;G2W53_033982;G2W53_033983;G2W53_037641;G2W53_037642	K20547+K20547+K01183+K01183+K00847+K13648+K12447+K01183+K01183+K20547+K20547+K01183+K01183+K01183+K01183+K01183+K01183+K01183+K08678+K08678
	Metabolism	Amino acid metabolism	Valine, leucine and isoleucine degradation	8	99	0.0808081	0.733461	1	ko00280	G2W53_002681;G2W53_006299;G2W53_006300;G2W53_031374;G2W53_031375;G2W53_034359;G2W53_034360;G2W53_034361	K01969+K00128+K00128+K00826+K00826+K05605+K05605+K05605
	Metabolism	Metabolism of other amino acids	beta-Alanine metabolism	7	88	0.0795455	0.741015	1	ko00410	G2W53_005762;G2W53_005763;G2W53_006299;G2W53_006300;G2W53_034359;G2W53_034360;G2W53_034361	K00276+K00276+K00128+K00128+K05605+K05605+K05605
	Metabolism	Metabolism of cofactors and vitamins	Riboflavin metabolism	2	28	0.0714286	0.758717	1	ko00740	G2W53_027610;G2W53_027611	K14379+K14379
	Metabolism	Lipid metabolism	Fatty acid elongation	4	54	0.0740741	0.766261	1	ko00062	G2W53_018984;G2W53_018985;G2W53_020034;G2W53_020035	K15397+K15397+K15397+K15397
	Cellular Processes	Transport and catabolism	Peroxisome	12	154	0.0779221	0.802622	1	ko04146	G2W53_010769;G2W53_010770;G2W53_010786;G2W53_010787;G2W53_021395;G2W53_021396;G2W53_042467;G2W53_042468;G2W53_042599;G2W53_042600;G2W53_006048;G2W53_006049	K13356+K13356+K13356+K13356+K13356+K13356+K17879+K17879+K08726+K08726+K13338+K13338
	Metabolism	Metabolism of cofactors and vitamins	Vitamin B6 metabolism	2	31	0.0645161	0.806867	1	ko00750	G2W53_013104;G2W53_023294	K05275+K05275
	Metabolism	Amino acid metabolism	Valine, leucine and isoleucine biosynthesis	2	32	0.0625	0.820908	1	ko00290	G2W53_031374;G2W53_031375	K00826+K00826
	Metabolism	Glycan biosynthesis and metabolism	Other types of O-glycan biosynthesis	2	34	0.0588235	0.846269	1	ko00514	G2W53_019170;G2W53_019171	K18134+K18134
	Metabolism	Metabolism of other amino acids	Glutathione metabolism	8	116	0.0689655	0.870839	1	ko00480	G2W53_000406;G2W53_020663;G2W53_020664;G2W53_029662;G2W53_029663;G2W53_035947;G2W53_020665;G2W53_035946	K00799+K00799+K00799+K00799+K00799+K00799+K00799+K00799
	Metabolism	Lipid metabolism	Biosynthesis of unsaturated fatty acids	2	37	0.0540541	0.878223	1	ko01040	G2W53_012089;G2W53_012090	K03921+K03921
	Metabolism	Carbohydrate metabolism	Pentose phosphate pathway	7	107	0.0654206	0.892027	1	ko00030	G2W53_002881;G2W53_002882;G2W53_013099;G2W53_013100;G2W53_013101;G2W53_030618;G2W53_030619	K00895+K00895+K01057+K01057+K01057+K01057+K01057
	Metabolism	Lipid metabolism	Glycerophospholipid metabolism	12	171	0.0701754	0.897011	1	ko00564	G2W53_002449;G2W53_012229;G2W53_012861;G2W53_012862;G2W53_029921;G2W53_030391;G2W53_030392;G2W53_030393;G2W53_035578;G2W53_035579;G2W53_012230;G2W53_029920	K00901+K13508+K06129+K06129+K01126+K13508+K13508+K13508+K18693+K18693+K13508+K01126
	Metabolism	Carbohydrate metabolism	Glycolysis / Gluconeogenesis	20	268	0.0746269	0.89751	1	ko00010	G2W53_002881;G2W53_002882;G2W53_005045;G2W53_005047;G2W53_006299;G2W53_006300;G2W53_006685;G2W53_006686;G2W53_016786;G2W53_021624;G2W53_021625;G2W53_021626;G2W53_021627;G2W53_021628;G2W53_042013;G2W53_042014;G2W53_011396;G2W53_011397;G2W53_016787;G2W53_024745	K00895+K00895+K00134+K00134+K00128+K00128+K00134+K00134+K00002+K01568+K01568+K01568+K01568+K01568+K01610+K01610+K00121+K00121+K00002+K01792
	Metabolism	Amino acid metabolism	Cysteine and methionine metabolism	12	176	0.0681818	0.916385	1	ko00270	G2W53_017262;G2W53_017263;G2W53_022655;G2W53_029081;G2W53_029082;G2W53_030740;G2W53_030741;G2W53_030742;G2W53_031374;G2W53_031375;G2W53_038124;G2W53_038125	K20772+K20772+K00549+K05933+K05933+K05933+K05933+K05933+K00826+K00826+K00815+K00815
	Metabolism	Metabolism of cofactors and vitamins	Biotin metabolism	1	27	0.037037	0.932356	1	ko00780	G2W53_008885	K09458
	Metabolism	Amino acid metabolism	Phenylalanine, tyrosine and tryptophan biosynthesis	4	76	0.0526316	0.93834	1	ko00400	G2W53_025581;G2W53_025582;G2W53_038124;G2W53_038125	K01736+K01736+K00815+K00815
	Metabolism	Metabolism of cofactors and vitamins	Nicotinate and nicotinamide metabolism	2	50	0.04	0.957521	1	ko00760	G2W53_006382;G2W53_006383	K03787+K03787
	Metabolism	Metabolism of cofactors and vitamins	Pantothenate and CoA biosynthesis	2	50	0.04	0.957521	1	ko00770	G2W53_031374;G2W53_031375	K00826+K00826
	Genetic Information Processing	Folding, sorting and degradation	Protein export	4	82	0.0487805	0.958699	1	ko03060	G2W53_016458;G2W53_016459;G2W53_023202;G2W53_023203	K09481+K09481+K03217+K03217
	Genetic Information Processing	Replication and repair	Base excision repair	3	68	0.0441176	0.962598	1	ko03410	G2W53_023861;G2W53_024787;G2W53_024788	K10798+K10569+K10569
	Environmental Information Processing	Signal transduction	Plant hormone signal transduction	45	598	0.0752508	0.9637	1	ko04075	G2W53_003380;G2W53_003389;G2W53_003390;G2W53_003391;G2W53_003392;G2W53_003403;G2W53_003404;G2W53_003405;G2W53_003418;G2W53_003419;G2W53_005201;G2W53_005374;G2W53_005375;G2W53_005967;G2W53_012222;G2W53_012315;G2W53_016496;G2W53_016497;G2W53_018811;G2W53_018812;G2W53_020744;G2W53_020745;G2W53_023872;G2W53_023873;G2W53_027959;G2W53_027960;G2W53_029449;G2W53_029450;G2W53_036624;G2W53_036625;G2W53_036…	K14488+K14488+K14488+K14488+K14488+K14488+K14488+K14488+K14488+K14488+K14486+K13449+K13449+K14516+K14486+K14485+K14494+K14494+K14497+K14497+K14503+K14503+K14516+K14516+K14488+K14488+K14514+K14514+K14487+K14487+K14487+K14504+K14504+K13415+K14491+K14491+K14516+K14516+K14494+K14494+K14488+K14514+K14514+K14514+K14486
	Cellular Processes	Transport and catabolism	Autophagy - other eukaryotes	2	52	0.0384615	0.964055	1	ko04136	G2W53_006596;G2W53_006597	K08330+K08330
	Metabolism	Nucleotide metabolism	Pyrimidine metabolism	5	104	0.0480769	0.974158	1	ko00240	G2W53_005666;G2W53_005667;G2W53_006382;G2W53_006383;G2W53_021121	K01510+K01510+K03787+K03787+K01465
	Metabolism	Glycan biosynthesis and metabolism	Glycosylphosphatidylinositol(GPI)-anchor biosynthesis	1	37	0.027027	0.975102	1	ko00563	G2W53_008120	K05287
	Genetic Information Processing	Folding, sorting and degradation	Ubiquitin mediated proteolysis	16	257	0.0622568	0.977427	1	ko04120	G2W53_006043;G2W53_006325;G2W53_006326;G2W53_015748;G2W53_015756;G2W53_016012;G2W53_016013;G2W53_029503;G2W53_029504;G2W53_030460;G2W53_030461;G2W53_032715;G2W53_038983;G2W53_038984;G2W53_015749;G2W53_015755	K03348+K03347+K03347+K04506+K04506+K06688+K06688+K03094+K03094+K03348+K03348+K06689+K10581+K10581+K04506+K04506
	Metabolism	Metabolism of cofactors and vitamins	Porphyrin and chlorophyll metabolism	3	75	0.04	0.977978	1	ko00860	G2W53_029297;G2W53_030823;G2W53_030824	K01885+K13600+K13600
	Metabolism	Amino acid metabolism	Arginine and proline metabolism	3	78	0.0384615	0.982527	1	ko00330	G2W53_006299;G2W53_006300;G2W53_028765	K00128+K00128+K01426
	Metabolism	Amino acid metabolism	Lysine degradation	3	80	0.0375	0.985045	1	ko00310	G2W53_006299;G2W53_006300;G2W53_024642	K00128+K00128+K11420
	Metabolism	Carbohydrate metabolism	Propanoate metabolism	3	81	0.037037	0.986169	1	ko00640	G2W53_034359;G2W53_034360;G2W53_034361	K05605+K05605+K05605
	Cellular Processes	Transport and catabolism	Phagosome	7	144	0.0486111	0.986624	1	ko04145	G2W53_003362;G2W53_003363;G2W53_016458;G2W53_016459;G2W53_019343;G2W53_019344;G2W53_032848	K02155+K02155+K09481+K09481+K02150+K02150+K07897
	Genetic Information Processing	Translation	Ribosome biogenesis in eukaryotes	8	159	0.0503145	0.986966	1	ko03008	G2W53_022669;G2W53_022670;G2W53_023296;G2W53_025773;G2W53_025774;G2W53_025776;G2W53_025777;G2W53_029490	K07562+K07562+K14521+K14548+K14548+K14548+K14548+K18532
	Metabolism	Metabolism of terpenoids and polyketides	Terpenoid backbone biosynthesis	3	83	0.0361446	0.98818	1	ko00900	G2W53_011367;G2W53_030064;G2W53_030065	K12742+K11778+K11778
	Metabolism	Metabolism of cofactors and vitamins	Ubiquinone and other terpenoid-quinone biosynthesis	4	106	0.0377358	0.992572	1	ko00130	G2W53_035848;G2W53_038124;G2W53_038125;G2W53_041852	K06127+K00815+K00815+K01904
	Metabolism	Carbohydrate metabolism	Glyoxylate and dicarboxylate metabolism	4	107	0.0373832	0.993107	1	ko00630	G2W53_017138;G2W53_017139;G2W53_019797;G2W53_019798	K15919+K15919+K01455+K01455
	Metabolism	Amino acid metabolism	Alanine, aspartate and glutamate metabolism	2	72	0.0277778	0.993573	1	ko00250	G2W53_012348;G2W53_012349	K01755+K01755
	Metabolism	Lipid metabolism	alpha-Linolenic acid metabolism	2	72	0.0277778	0.993573	1	ko00592	G2W53_011310;G2W53_011311	K05894+K05894
	Metabolism	Amino acid metabolism	Glycine, serine and threonine metabolism	4	110	0.0363636	0.994499	1	ko00260	G2W53_005762;G2W53_005763;G2W53_017138;G2W53_017139	K00276+K00276+K15919+K15919
	Metabolism	Energy metabolism	Oxidative phosphorylation	7	159	0.0440252	0.994848	1	ko00190	G2W53_000046;G2W53_000047;G2W53_003362;G2W53_003363;G2W53_019343;G2W53_019344;G2W53_034153	K02135+K02135+K02155+K02155+K02150+K02150+K01507
	Metabolism	Energy metabolism	Photosynthesis	2	75	0.0266667	0.995068	1	ko00195	G2W53_008670;G2W53_008671	K02639+K02639
	Metabolism	Carbohydrate metabolism	Citrate cycle (TCA cycle)	3	96	0.03125	0.995833	1	ko00020	G2W53_008051;G2W53_042013;G2W53_042014	K01679+K01610+K01610
	Genetic Information Processing	Translation	RNA transport	22	379	0.0580475	0.996897	1	ko03013	G2W53_000330;G2W53_000499;G2W53_000500;G2W53_002378;G2W53_002379;G2W53_005209;G2W53_013857;G2W53_017289;G2W53_017290;G2W53_020609;G2W53_021014;G2W53_021015;G2W53_021693;G2W53_021694;G2W53_021695;G2W53_021696;G2W53_022669;G2W53_022670;G2W53_025559;G2W53_025560;G2W53_034765;G2W53_037676	K12879+K00784+K00784+K00784+K00784+K14315+K03257+K03236+K03236+K09291+K03113+K03113+K14292+K14292+K14292+K14292+K07562+K07562+K03231+K03231+K14319+K14292
	Metabolism	Nucleotide metabolism	Purine metabolism	6	151	0.0397351	0.996935	1	ko00230	G2W53_005666;G2W53_005667;G2W53_006382;G2W53_006383;G2W53_029490;G2W53_043966	K01510+K01510+K03787+K03787+K18532+K19964
	Metabolism	Carbohydrate metabolism	Pyruvate metabolism	5	142	0.0352113	0.998216	1	ko00620	G2W53_006299;G2W53_006300;G2W53_008051;G2W53_042013;G2W53_042014	K00128+K00128+K01679+K01610+K01610
	Genetic Information Processing	Folding, sorting and degradation	Protein processing in endoplasmic reticulum	40	629	0.063593	0.998502	1	ko04141	G2W53_004596;G2W53_004597;G2W53_004953;G2W53_006325;G2W53_006326;G2W53_016458;G2W53_016459;G2W53_016672;G2W53_016673;G2W53_020012;G2W53_022464;G2W53_023711;G2W53_026119;G2W53_026120;G2W53_029503;G2W53_029504;G2W53_031826;G2W53_032126;G2W53_032127;G2W53_032291;G2W53_032292;G2W53_032293;G2W53_032294;G2W53_032297;G2W53_032298;G2W53_032299;G2W53_032458;G2W53_032459;G2W53_032715;G2W53_032855;G2W53_033…	K03283+K03283+K03283+K03347+K03347+K09481+K09481+K09555+K09555+K16196+K16196+K14015+K03283+K03283+K03094+K03094+K13525+K13989+K13989+K03283+K03283+K03283+K03283+K03283+K03283+K03283+K13525+K13525+K06689+K03283+K03283+K03283+K10839+K03283+K03283+K03283+K04079+K04079+K16196+K03283
	Genetic Information Processing	Folding, sorting and degradation	Proteasome	2	95	0.0210526	0.999181	1	ko03050	G2W53_030218;G2W53_030219	K03063+K03063
	Metabolism	Energy metabolism	Carbon fixation in photosynthetic organisms	6	198	0.030303	0.999904	1	ko00710	G2W53_005045;G2W53_005047;G2W53_006685;G2W53_006686;G2W53_042013;G2W53_042014	K00134+K00134+K00134+K00134+K01610+K01610
	Genetic Information Processing	Transcription	Spliceosome	25	514	0.0486381	0.999976	1	ko03040	G2W53_000330;G2W53_000620;G2W53_004596;G2W53_004597;G2W53_004953;G2W53_005018;G2W53_026119;G2W53_026120;G2W53_032291;G2W53_032292;G2W53_032293;G2W53_032294;G2W53_032297;G2W53_032298;G2W53_032299;G2W53_032855;G2W53_033597;G2W53_034303;G2W53_037725;G2W53_038814;G2W53_038815;G2W53_040828;G2W53_040829;G2W53_028514;G2W53_032296	K12879+K12867+K03283+K03283+K03283+K12811+K03283+K03283+K03283+K03283+K03283+K03283+K03283+K03283+K03283+K03283+K03283+K03283+K03283+K03283+K03283+K11094+K11094+K12830+K03283
	Metabolism	Global and overview maps	Biosynthesis of amino acids	21	471	0.044586	0.99999	1	ko01230	G2W53_005045;G2W53_005047;G2W53_006685;G2W53_006686;G2W53_012348;G2W53_012349;G2W53_017301;G2W53_017302;G2W53_017303;G2W53_019730;G2W53_019731;G2W53_022655;G2W53_024026;G2W53_024027;G2W53_025581;G2W53_025582;G2W53_031374;G2W53_031375;G2W53_034384;G2W53_038124;G2W53_038125	K00134+K00134+K00134+K00134+K01755+K01755+K00215+K00215+K00215+K01438+K01438+K00549+K00145+K00145+K01736+K01736+K00826+K00826+K14677+K00815+K00815
	Genetic Information Processing	Translation	mRNA surveillance pathway	10	301	0.0332226	0.999992	1	ko03015	G2W53_027884;G2W53_027885;G2W53_029219;G2W53_032313;G2W53_032314;G2W53_032315;G2W53_034419;G2W53_034420;G2W53_008194;G2W53_008195	K14396+K14396+K14416+K14376+K14376+K14376+K03265+K03265+K14376+K14376
	Cellular Processes	Transport and catabolism	Endocytosis	28	585	0.0478632	0.999995	1	ko04144	G2W53_004596;G2W53_004597;G2W53_004953;G2W53_008279;G2W53_008280;G2W53_013376;G2W53_013377;G2W53_026119;G2W53_026120;G2W53_031874;G2W53_032291;G2W53_032292;G2W53_032293;G2W53_032294;G2W53_032297;G2W53_032298;G2W53_032299;G2W53_032848;G2W53_032855;G2W53_033597;G2W53_034303;G2W53_036031;G2W53_036032;G2W53_036033;G2W53_037725;G2W53_038814;G2W53_038815;G2W53_032296	K03283+K03283+K03283+K19366+K19366+K18443+K18443+K03283+K03283+K12472+K03283+K03283+K03283+K03283+K03283+K03283+K03283+K07897+K03283+K03283+K03283+K12472+K12472+K12472+K03283+K03283+K03283+K03283
	Metabolism	Global and overview maps	Carbon metabolism	21	494	0.0425101	0.999998	1	ko01200	G2W53_005045;G2W53_005047;G2W53_006685;G2W53_006686;G2W53_008051;G2W53_013099;G2W53_013100;G2W53_013101;G2W53_017138;G2W53_017139;G2W53_019797;G2W53_019798;G2W53_030618;G2W53_030619;G2W53_034359;G2W53_034360;G2W53_034361;G2W53_042013;G2W53_042014;G2W53_011396;G2W53_011397	K00134+K00134+K00134+K00134+K01679+K01057+K01057+K01057+K15919+K15919+K01455+K01455+K01057+K01057+K05605+K05605+K05605+K01610+K01610+K00121+K00121
	Genetic Information Processing	Replication and repair	Mismatch repair	4	212	0.0188679	0.999999	1	ko03430	G2W53_004221;G2W53_010710;G2W53_012143;G2W53_012144	K07466+K07466+K10755+K10755
	Genetic Information Processing	Translation	Ribosome	14	401	0.0349127	0.999999	1	ko03010	G2W53_002700;G2W53_002701;G2W53_005200;G2W53_013262;G2W53_013263;G2W53_015992;G2W53_015993;G2W53_015994;G2W53_015995;G2W53_035747;G2W53_036165;G2W53_036166;G2W53_038850;G2W53_038851	K02912+K02912+K02923+K02955+K02955+K02901+K02901+K02901+K02901+K02941+K02873+K02873+K02937+K02937
	Genetic Information Processing	Replication and repair	Nucleotide excision repair	5	242	0.0206612	1	1	ko03420	G2W53_004221;G2W53_010710;G2W53_012143;G2W53_012144;G2W53_035637	K07466+K07466+K10755+K10755+K10839
	Genetic Information Processing	Replication and repair	DNA replication	4	227	0.0176211	1	1	ko03030	G2W53_004221;G2W53_010710;G2W53_012143;G2W53_012144	K07466+K07466+K10755+K10755
	Genetic Information Processing	Folding, sorting and degradation	RNA degradation	3	276	0.0108696	1	1	ko03018	G2W53_018780;G2W53_043347;G2W53_043348	K14442+K04077+K04077
	Genetic Information Processing	Replication and repair	Homologous recombination	2	224	0.00892857	1	1	ko03440	G2W53_004221;G2W53_010710	K07466+K07466

## Sheet: Supplementary Table S4
Supplementary Table S4. Classification of all 175 TDGs enriched in 'biosynthesis of other secondary metabolites' KEGG pathway category in Senna tora.
Gene ID	Annotation	Gene number
G2W53_005496	chalcone synthase 5 [Senna tora]	19
G2W53_005497	chalcone synthase [Senna tora]
G2W53_005823	chalcone synthase [Senna tora]
G2W53_005824	chalcone synthase [Senna tora]
G2W53_005825	chalcone synthase [Senna tora]
G2W53_022815	chalcone synthase-like [Senna tora]
G2W53_022816	chalcone synthase-like [Senna tora]
G2W53_022821	chalcone synthase-like [Senna tora]
G2W53_022822	chalcone synthase [Senna tora]
G2W53_022823	chalcone synthase-like [Senna tora]
G2W53_022824	chalcone synthase [Senna tora]
G2W53_022825	chalcone synthase-like [Senna tora]
G2W53_022826	chalcone synthase-like [Senna tora]
G2W53_022827	chalcone synthase-like [Senna tora]
G2W53_022830	chalcone synthase [Senna tora]
G2W53_022831	chalcone synthase-like [Senna tora]
G2W53_022832	chalcone synthase-like [Senna tora]
G2W53_022837	chalcone synthase-like [Senna tora]
G2W53_022838	chalcone synthase-like [Senna tora]
G2W53_001746	UDP-glycosyltransferase 72E1-like [Senna tora]	15
G2W53_001747	UDP-glycosyltransferase 72E1-like [Senna tora]
G2W53_003502	UDP-glycosyltransferase 79B30-like [Senna tora]
G2W53_003503	UDP-glycosyltransferase 79B30-like [Senna tora]
G2W53_025390	UDP-glycosyltransferase 79B30-like [Senna tora]
G2W53_025391	UDP-glycosyltransferase 79B30-like [Senna tora]
G2W53_025393	UDP-glycosyltransferase 79B30-like [Senna tora]
G2W53_025394	UDP-glycosyltransferase 79B30-like [Senna tora]
G2W53_011261	anthocyanidin 5,3-O-glucosyltransferase [Senna tora]
G2W53_011262	UDP-glycosyltransferase 88F3-like [Senna tora]
G2W53_011260	UDP-glycosyltransferase 88F5 [Senna tora]
G2W53_011257	UDP-glycosyltransferase 88F5-like [Senna tora]
G2W53_011258	UDP-glycosyltransferase 88F5-like [Senna tora]
G2W53_011259	UDP-glycosyltransferase 88F5-like [Senna tora]
G2W53_011263	UDP-glycosyltransferase 88F5-like [Senna tora]
G2W53_037525	beta-glucosidase 12 isoform X2 [Senna tora]	14
G2W53_037526	cyanogenic beta-glucosidase [Senna tora]
G2W53_037528	cyanogenic beta-glucosidase-like [Senna tora]
G2W53_037529	beta-glucosidase 12-like [Senna tora]
G2W53_001734	beta-glucosidase 12-like [Senna tora]
G2W53_001735	beta-glucosidase 12-like [Senna tora]
G2W53_008817	beta-glucosidase 24-like [Senna tora]
G2W53_008818	beta-glucosidase 24-like [Senna tora]
G2W53_008820	beta-glucosidase 12 isoform X2 [Senna tora]
G2W53_008821	beta-glucosidase 24 [Senna tora]
G2W53_035794	beta-glucosidase 40 [Senna tora]
G2W53_035795	beta-glucosidase 40-like [Senna tora]
G2W53_002949	beta-glucosidase 46-like [Senna tora]
G2W53_002950	beta-glucosidase 46-like [Senna tora]
G2W53_016050	cinnamoyl-CoA reductase 1-like [Senna tora]	10
G2W53_016051	cinnamoyl-CoA reductase [Senna tora]
G2W53_016038	cinnamoyl-CoA reductase 1 [Senna tora]
G2W53_016039	cinnamoyl-CoA reductase 1-like [Senna tora]
G2W53_016045	cinnamoyl-CoA reductase 1-like [Senna tora]
G2W53_016046	cinnamoyl-CoA reductase 1-like [Senna tora]
G2W53_016047	cinnamoyl-CoA reductase 1-like [Senna tora]
G2W53_000116	cinnamoyl-CoA reductase 2-like [Senna tora]
G2W53_000117	cinnamoyl-CoA reductase 2-like [Senna tora]
G2W53_000118	cinnamoyl-CoA reductase 2-like [Senna tora]
G2W53_019826	cytochrome P450 81E8-like [Senna tora]	8
G2W53_019827	cytochrome P450 81E8-like [Senna tora]
G2W53_019829	cytochrome P450 81E8-like [Senna tora]
G2W53_019830	cytochrome P450 81E8-like [Senna tora]
G2W53_019832	cytochrome P450 81E8-like [Senna tora]
G2W53_019833	cytochrome P450 81E8-like [Senna tora]
G2W53_019835	cytochrome P450 81E8-like [Senna tora]
G2W53_019836	cytochrome P450 81E8-like [Senna tora]
G2W53_000661	caffeic acid 3-O-methyltransferase [Senna tora]	8
G2W53_000662	caffeic acid 3-O-methyltransferase-like [Senna tora]
G2W53_000665	caffeic acid 3-O-methyltransferase-like [Senna tora]
G2W53_000666	caffeic acid 3-O-methyltransferase-like [Senna tora]
G2W53_000668	caffeic acid 3-O-methyltransferase-like [Senna tora]
G2W53_000669	caffeic acid 3-O-methyltransferase-like [Senna tora]
G2W53_000748	caffeic acid 3-O-methyltransferase-like [Senna tora]
G2W53_000749	caffeic acid 3-O-methyltransferase [Senna tora]
G2W53_000412	putative O-methyltransferase 3 [Senna tora]	6
G2W53_000413	putative O-methyltransferase 3 [Senna tora]
G2W53_008804	putative O-methyltransferase 3 [Senna tora]
G2W53_008805	putative O-methyltransferase 3 [Senna tora]
G2W53_021090	putative O-methyltransferase 3 [Senna tora]
G2W53_021091	putative O-methyltransferase 3 [Senna tora]
G2W53_004700	berberine bridge enzyme-like 13 [Senna tora]	6
G2W53_004701	berberine bridge enzyme-like 13 [Senna tora]
G2W53_004705	berberine bridge enzyme-like 22 [Senna tora]
G2W53_004706	berberine bridge enzyme-like 22 [Senna tora]
G2W53_043018	berberine bridge enzyme-like 8 [Senna tora]
G2W53_043019	berberine bridge enzyme-like 21 [Senna tora]
G2W53_021159	(R,S)-reticuline 7-O-methyltransferase-like [Senna tora]	2
G2W53_021160	(R,S)-reticuline 7-O-methyltransferase-like [Senna tora]
G2W53_005743	2-hydroxyisoflavanone dehydratase-like [Senna tora]	2
G2W53_005744	2-hydroxyisoflavanone dehydratase-like [Senna tora]
G2W53_042486	anthocyanidin 3-O-glucoside 2''-O-glucosyltransferase-like [Senna tora]	2
G2W53_042487	anthocyanidin 3-O-glucoside 2''-O-glucosyltransferase-like [Senna tora]
G2W53_016160	BAHD acyltransferase [Senna tora]	2
G2W53_016161	BAHD acyltransferase [Senna tora]
G2W53_004903	cationic peroxidase 2 [Senna tora]	2
G2W53_004902	cationic peroxidase 2-like [Senna tora]
G2W53_032366	chalcone isomerase [Senna tora]	2
G2W53_032365	chalcone--flavonone isomerase 1B-1 [Senna tora]
G2W53_037526	cyanogenic beta-glucosidase [Senna tora]	2
G2W53_037528	cyanogenic beta-glucosidase-like [Senna tora]
G2W53_007082	F-box protein [Senna tora]	2
G2W53_007083	F-box protein [Senna tora]
G2W53_013750	F-box protein interaction domain protein [Senna tora]	2
G2W53_013751	F-box protein interaction domain protein [Senna tora]
G2W53_015922	flavonoid 3',5'-hydroxylase [Senna tora]	2
G2W53_015923	flavonoid 3',5'-hydroxylase [Senna tora]
G2W53_038410	flavonoid 3'-monooxygenase [Senna tora]	2
G2W53_038411	flavonoid 3'-monooxygenase [Senna tora]
G2W53_030857	flavonol synthase	2
G2W53_030858	flavonol synthase
G2W53_025517	isoliquiritigenin 2'-O-methyltransferase-like [Senna tora]	2
G2W53_025518	isoliquiritigenin 2'-O-methyltransferase-like [Senna tora]
G2W53_019025	Leucoanthocyanidin reductase [Senna tora]	2
G2W53_019026	Leucoanthocyanidin reductase [Senna tora]
G2W53_032379	lignin-forming anionic peroxidase-like [Senna tora]	2
G2W53_032380	lignin-forming anionic peroxidase-like [Senna tora]
G2W53_016082	Lysosomal beta glucosidase [Senna tora]	2
G2W53_016083	Lysosomal beta glucosidase [Senna tora]
G2W53_013946	NAD(P)H-dependent 6'-deoxychalcone synthase-like [Senna tora]	2
G2W53_013947	NAD(P)H-dependent 6'-deoxychalcone synthase-like [Senna tora]
G2W53_029754	peroxidase 28-like [Senna tora]	2
G2W53_029755	peroxidase 28-like [Senna tora]
G2W53_040821	peroxidase 55 [Senna tora]	2
G2W53_040822	peroxidase 55 [Senna tora]
G2W53_013225	peroxidase P7-like [Senna tora]	2
G2W53_013226	peroxidase P7-like [Senna tora]
G2W53_043233	polygalacturonase inhibitor-like [Senna tora]	2
G2W53_043234	polygalacturonase inhibitor-like [Senna tora]
G2W53_005762	primary amine oxidase-like [Senna tora]	2
G2W53_005763	primary amine oxidase-like [Senna tora]
G2W53_031691	Retrovirus-related Pol polyprotein from transposon 17.6 [Senna tora]	2
G2W53_041852	Retrovirus-related Pol polyprotein from transposon TNT 1-94 [Senna tora]
G2W53_038124	tyrosine aminotransferase-like [Senna tora]	2
G2W53_038125	tyrosine aminotransferase-like [Senna tora]
G2W53_011979	dihydroflavonol 4-reducatase 2 [Senna tora]	3
G2W53_011980	dihydroflavonol 4-reducatase 2 [Senna tora]
G2W53_011981	dihydroflavonol 4-reducatase 2 [Senna tora]
G2W53_042609	polyphenol oxidase, chloroplastic-like [Senna tora]	3
G2W53_042610	polyphenol oxidase, chloroplastic-like [Senna tora]
G2W53_042611	polyphenol oxidase, chloroplastic-like [Senna tora]
G2W53_020425	putative mannitol dehydrogenase [Senna tora]	3
G2W53_020426	putative mannitol dehydrogenase [Senna tora]
G2W53_020427	putative mannitol dehydrogenase [Senna tora]
G2W53_024723	spermidine hydroxycinnamoyl transferase-like [Senna tora]	3
G2W53_024724	spermidine hydroxycinnamoyl transferase-like [Senna tora]
G2W53_024725	spermidine hydroxycinnamoyl transferase-like [Senna tora]
G2W53_017166	vestitone reductase-like isoform X2 [Senna tora]	3
G2W53_017167	bifunctional dihydroflavonol 4-reductase [Senna tora]
G2W53_017168	vestitone reductase-like [Senna tora]
G2W53_021205	coumaroyl-CoA:anthocyanidin 3-O-glucoside-6''-O-coumaroyltransferase 1-like [Senna tora]	4
G2W53_021206	coumaroyl-CoA:anthocyanidin 3-O-glucoside-6''-O-coumaroyltransferase 1-like [Senna tora]
G2W53_038043	coumaroyl-CoA:anthocyanidin 3-O-glucoside-6''-O-coumaroyltransferase 1-like [Senna tora]
G2W53_038042	coumaroyl-CoA:anthocyanidin 3-O-glucoside-6''-O-coumaroyltransferase 2-like [Senna tora]
G2W53_016883	vinorine synthase-like [Senna tora]	4
G2W53_016884	vinorine synthase-like [Senna tora]
G2W53_016886	vinorine synthase-like [Senna tora]
G2W53_016887	vinorine synthase-like [Senna tora]
G2W53_034143	phenolic glucoside malonyltransferase 1-like [Senna tora]	4
G2W53_034144	phenolic glucoside malonyltransferase 1-like [Senna tora]
G2W53_034149	phenolic glucoside malonyltransferase 1-like [Senna tora]
G2W53_034150	phenolic glucoside malonyltransferase 1-like [Senna tora]
G2W53_002323	uncharacterized protein G2W53_002323 [Senna tora]	14
G2W53_002322	DUF674 family protein [Senna tora]
G2W53_016745	DUF674 family protein [Senna tora]
G2W53_016746	DUF674 family protein [Senna tora]
G2W53_016747	DUF674 family protein [Senna tora]
G2W53_016751	DUF674 family protein [Senna tora]
G2W53_016752	DUF674 family protein [Senna tora]
G2W53_032333	DUF674 family protein [Senna tora]
G2W53_032334	DUF674 family protein [Senna tora]
G2W53_032339	DUF674 domain-containing protein [Senna tora]
G2W53_032340	DUF674 family protein [Senna tora]
G2W53_032336	uncharacterized protein G2W53_032336 [Senna tora]
G2W53_032337	DUF674 family protein [Senna tora]
G2W53_032338	Mitochondrial distribution and morphology protein [Senna tora]

## Sheet: Supplementary Table S5
Supplementary Table S5. Identification of type III PKS superfamily genes in Senna tora and other plants.
Species	Number of genes	Gene IDs	Homolog in Arabidopsis thaliana
Senna tora[1]	33	G2W53_001804	At1g02050 (PKS-A)
		G2W53_001832
		G2W53_031788	At4g34850 (PKS-B)
		G2W53_001187	At5g13930 (CHS)
		G2W53_002718
		G2W53_005493
		G2W53_005496
		G2W53_005497
		G2W53_005821
		G2W53_005823
		G2W53_005824
		G2W53_005825
		G2W53_006305
		G2W53_022815
		G2W53_022816
		G2W53_022818
		G2W53_022821
		G2W53_022822
		G2W53_022823
		G2W53_022824
		G2W53_022825
		G2W53_022826
		G2W53_022827
		G2W53_022828
		G2W53_022830
		G2W53_022831
		G2W53_022832
		G2W53_022837
		G2W53_022838
		G2W53_024354
		G2W53_024789
		G2W53_030764
		G2W53_030769
Chamaecrista fasciculata[2]	36	Chafa2214S08092	At1g02050 (PKS-A)
		Chafa95884S30559
		Chafa4830S23352	At4g34850 (PKS-B)
		Chafa1626S16619	At5g13930 (CHS)
		Chafa1626S16623
		Chafa140S15569
		Chafa140S15570
		Chafa210S18279
		Chafa210S18281
		Chafa210S18285
		Chafa210S18286
		Chafa11498S14367
		Chafa8866S27842
		Chafa8866S27843
		Chafa2618S19715
		Chafa2618S19716
		Chafa2618S19717
		Chafa292S08778
		Chafa292S20338
		Chafa7676S11659
		Chafa7432S26432
		Chafa2493S08387
		Chafa1132S14250
		Chafa8415S11989
		Chafa8415S11992
		Chafa8415S27463
		Chafa8351S27403
		Chafa1034S13615
		Chafa1034S13616
		Chafa6617S11158
		Chafa96096S13252
		Chafa6966S25880
		Chafa95458S29720
		Chafa377S21896
		Chafa8454S27505
		Chafa7165S26155
Mimosa pudica[2]	16	Mimpu11173S13810	At4g34850 (PKS-B)
		Mimpu2523S20854
		Mimpu18580S07889	At5g13930 (CHS)
		Mimpu4504S10583
		Mimpu20S19560
		Mimpu1747S30428
		Mimpu5973S04116
		Mimpu5973S32329
		Mimpu14008S00748
		Mimpu14008S15317
		Mimpu9385S12840
		Mimpu3449S09845
		Mimpu3449S22563
		Mimpu12288S05824
		Mimpu17S18667
		Mimpu19438S19218
Cercis canadensis[3]	25	Cerca1S06766	At1g02050 (PKS-A)
		Cerca975S33995	At4g34850 (PKS-B)
		Cerca170S15972
		Cerca21S18160	At5g13930 (CHS)
		Cerca22S18461
		Cerca22S18462
		Cerca22S32492
		Cerca26S07473
		Cerca43S24564
		Cerca81S10953
		Cerca91S30951
		Cerca104S05337
		Cerca104S11992
		Cerca104S11993
		Cerca104S11994
		Cerca80S29945
		Cerca161S15554
		Cerca161S15555
		Cerca169S15789
		Cerca169S32229
		Cerca741S29170
		Cerca940S11466
		Cerca952S31177
		Cerca975S33995
		Cerca1023S05214
Glycine max[4]	24	Glyma.01G073600.1.p	At1g02050 (PKS-A)
		Glyma.11G097900.1.p	At4g34850 (PKS-B)
		Glyma.12G023800.1.p
		Glyma.01G091400.1.p	At5g13930 (CHS)
		Glyma.01G228700.1.p
		Glyma.02G130400.1.p
		Glyma.05G153100.1.p
		Glyma.05G153200.1.p
		Glyma.06G118500.1.p
		Glyma.06G118600.1.p
		Glyma.08G109200.1.p
		Glyma.08G109300.1.p
		Glyma.08G109400.1.p
		Glyma.08G109500.1.p
		Glyma.08G110300.1.p
		Glyma.08G110400.1.p
		Glyma.08G110500.1.p
		Glyma.08G110700.1.p
		Glyma.08G110900.2.p
		Glyma.09G074900.1.p
		Glyma.09G075200.1.p
		Glyma.11G011500.1.p
		Glyma.13G034300.1.p
		Glyma.19G105100.1.p
		Glyma.08G110900.1.p
		Glyma.11G011500.2.p
Medicago truncatula[5]	24	Medtr4g078730.1	At1g02050 (PKS-A)
		Medtr4g075560.1	At4g34850 (PKS-B)
		Medtr1g097910.1	At5g13930 (CHS)
		Medtr1g097935.1
		Medtr1g098140.1
		Medtr2g058470.1
		Medtr3g083910.1
		Medtr3g083920.1
		Medtr3g086260.1
		Medtr3g088670.1
		Medtr3g088675.1
		Medtr5g007713.1
		Medtr5g007717.1
		Medtr5g007723.1
		Medtr5g007730.1
		Medtr5g007740.1
		Medtr5g007760.1
		Medtr5g007770.1
		Medtr7g016700.1
		Medtr7g016720.1
		Medtr7g016780.1
		Medtr7g016800.1
		Medtr7g016820.1
		Medtr7g084300.1
Cicer arietinum[6]	9	Ca_25926.1	At1g02050 (PKS-A)
		Ca_17280.1	At4g34850 (PKS-B)
		Ca_13666.1	At5g13930 (CHS)
		Ca_22255.1
		Ca_22256.1
		Ca_22257.1
		Ca_24067.1
		Ca_25111.1
		Ca_30233.1
Arachis duranensis[7]	37	Aradu.FT8DK.1	At1g02050 (PKS-A)
		Aradu.7F3TN.1	At4g34850 (PKS-B)
		Aradu.PG2U7.1	At5g13930 (CHS)
		Aradu.YC5B5.1
		Aradu.51F84.1
		Aradu.537VV.1
		Aradu.56C76.1
		Aradu.59KVZ.1
		Aradu.72KEV.1
		Aradu.72V59.1
		Aradu.9BM9J.1
		Aradu.ETY3A.1
		Aradu.G80S0.1
		Aradu.H7DF4.1
		Aradu.H9IK5.1
		Aradu.J6XSM.1
		Aradu.JL5FQ.1
		Aradu.K2677.1
		Aradu.KQ7RG.1
		Aradu.LJ1CG.1
		Aradu.LZ0RH.1
		Aradu.P2LIW.1
		Aradu.P9QYX.1
		Aradu.W0CCT.1
		Aradu.W79GG.1
		Aradu.WV5HP.1
		Aradu.XB9DF.1
		Aradu.XCU6I.1
		Aradu.YC877.1
		Aradu.ZWT01.1
		Aradu.11DJA.1
		Aradu.F4M5D.1
		Aradu.WB4GB.1
		Aradu.9KZ2C.1
		Aradu.BI5M4.1
		Aradu.G8B40.1
		Aradu.QCT1V.1
Arachis ipaensis[8]	36	Araip.I8X4Y.1	At1g02050 (PKS-A)
		Araip.L8VR7.1	At4g34850 (PKS-B)
		Araip.PF5R6.1	At5g13930 (CHS)
		Araip.IA0U9.1
		Araip.5S2PS.1
		Araip.73H5Y.1
		Araip.U7CA5.1
		Araip.H6229.1
		Araip.25IGU.1
		Araip.YDG4K.1
		Araip.3T4SK.1
		Araip.9Z32Z.1
		Araip.S9JRR.1
		Araip.YF2QF.1
		Araip.CV0WG.1
		Araip.QB1YM.1
		Araip.7L672.1
		Araip.FM6GG.1
		Araip.THJ4F.1
		Araip.V9QDS.1
		Araip.Z5UEI.1
		Araip.BU4FE.1
		Araip.B8TJ0.1
		Araip.E7BUX.1
		Araip.QL51L.1
		Araip.TTM09.1
		Araip.7P0TV.1
		Araip.CCB7P.1
		Araip.8ZH5X.1
		Araip.62EH4.1
		Araip.JD11C.1
		Araip.LS9BW.1
		Araip.Q8ZS3.1
		Araip.3M688.1
		Araip.4WK7Z.1
		Araip.K8B3B.1
Cajanus cajan[9]	15	C.cajan_19240	At1g02050 (PKS-A)
		C.cajan_21074	At4g34850 (PKS-B)
		C.cajan_38726	At5g13930 (CHS)
		C.cajan_37423
		C.cajan_20347
		C.cajan_20625
		C.cajan_47702
		C.cajan_47742
		C.cajan_08958
		C.cajan_45286
		C.cajan_24072
		C.cajan_23441
		C.cajan_23442
		C.cajan_03204
		C.cajan_43674
Lupinus albus[10]	8	Lal_00033978	At1g02050 (PKS-A)
		Lal_00034854	At4g34850 (PKS-B)
		Lal_00013961	At5g13930 (CHS)
		Lal_00029162
		Lal_00006678
		Lal_00038127
		Lal_00007794
		Lal_00027736
Phaseolus vulgaris[11]	17	Phvul.008G141200.1	At1g02050 (PKS-A)
		Phvul.011G026000.1	At4g34850 (PKS-B)
		Phvul.011G039700.1
		Phvul.001G067800.1	At5g13930 (CHS)
		Phvul.001G067950.1
		Phvul.001G083000.1
		Phvul.002G038600.1
		Phvul.002G038700.1
		Phvul.002G038800.2
		Phvul.002G038900.1
		Phvul.002G039000.1
		Phvul.002G039100.1
		Phvul.002G039166.1
		Phvul.002G039232.1
		Phvul.002G039300.1
		Phvul.002G184300.1
		Phvul.009G131000.1
Vitis vinitera[12]	26	GSVIVT01018219001	At1g02050 (PKS-A)
		GSVIVT01024107001	At4g34850 (PKS-B)
		GSVIVT01000521001	At5g13930 (CHS)
		GSVIVT01010554001
		GSVIVT01010556001
		GSVIVT01010557001
		GSVIVT01010561001
		GSVIVT01010563001
		GSVIVT01010565001
		GSVIVT01010568001
		GSVIVT01010570001
		GSVIVT01010572001
		GSVIVT01010574001
		GSVIVT01010578001
		GSVIVT01010579001
		GSVIVT01010580001
		GSVIVT01010581001
		GSVIVT01010582001
		GSVIVT01010583001
		GSVIVT01010584001
		GSVIVT01010585001
		GSVIVT01010589001
		GSVIVT01010590001
		GSVIVT01026213001
		GSVIVT01026220001
		GSVIVT01032968001
Arabidopsis thaliana[13]	3	AT1G02050.1	At1g02050 (PKS-A)
		AT4G34850.1	At4g34850 (PKS-B)
		AT5G13930.1	At5g13930 (CHS)
References
[1] Kang, S.H.; Pandey, R.P.; Lee, C.M.; Sim, J.S.; Jeong, J.T.; Choi, B.S.; Jung, M.; Ginzburg, D.; Zhai, K.; Won, S.Y.; et al. Genome enabled discovery of anthraquinone biosynthesis in Senna tora. Nat. Commun. 2020, 11, 5875. https://doi.org/10.1038/s41467-020-19681-1.
[2] Griesmann, M.; Chang, Y.; Liu, X.; Song, Y.; Haberer, G.; Crook, M.B.; Billault-Penneteau, B.; Lauressergues, D.; Keller, J.; Imanishi, L.; et al. Phylogenomics reveals multiple losses of nitrogen-fixing root nodule symbiosis. Science 2018, 361, 144. https://doi.org/10.1126/science.aat1743.
[3] Kreplak, J.; Madoui, M.-A.; Cápal, P.; Novák, P.; Labadie, K.; Aubert, G.; Bayer, P.E.; Gali, K.K.; Syme, R.A.; Main, D.; et al. A reference genome for pea provides insight into legume genome evolution. Nat. Genet. 2019, 51, 1411–1422. https://doi.org/10.1038/s41588-019-0480-1.
[4] Schmutz, J.; Cannon, S.B.; Schlueter, J.; Ma, J.; Mitros, T.; Nelson, W.; Hyten, D.L.; Song, Q.; Thelen, J.J.; Cheng, J.; et al. Genome sequence of the palaeopolyploid soybean. Nature 2010, 463, 178–183. https://doi.org/10.1038/nature08670.
[5] Tang, H.; Krishnakumar, V.; Bidwell, S.; Rosen, B.; Chan, A.; Zhou, S.; Gentzbittel, L.; Childs, K.L.; Yandell, M.; Gundlach, H.; et al. An improved genome release (version Mt4.0) for the model legume Medicago truncatula. BMC Genomics 2014, 15, 312. https://doi.org/10.1186/1471-2164-15-312.
[6] Parween, S.; Nawaz, K.; Roy, R.; Pole, A.K.; Suresh, B.V.; Misra, G.; Jain, M.; Yadav, G.; Parida, S.K.; Tyagi, A.K.; et al. An advanced draft genome assembly of a desi type chickpea (Cicer arietinum L.). Sci. Rep. 2015, 5, 12806, https://doi.org/10.1038/srep12806.
[7] Chen, X.; Li, H.; Pandey, M.K.; Yang, Q.; Wang, X.; Garg, V.; Li, H.; Chi, X.; Doddamani, D.; Hong, Y.; et al. Draft genome of the peanut A-genome progenitor (Arachis duranensis) provides insights into geocarpy, oil biosynthesis, and allergens. Proc. Natl. Acad. Sci. USA 2016, 113, 6785–6790. https://doi.org/10.1073/pnas.1600899113.
[8] Lu, Q.; Li, H.; Hong, Y.; Zhang, G.; Wen, S.; Li, X.; Zhou, G.; Li, S.; Liu, H.; Liu, H.; et al. Genome sequencing and analysis of the peanut B-genome progenitor (Arachis ipaensis). Front. Plant Sci. 2018, 9, 604. https://doi.org/10.3389/fpls.2018.00604.
[9] Varshney, R.K.; Chen, W.; Li, Y.; Bharti, A.K.; Saxena, R.K.; Schlueter, J.A.; Donoghue, M.T.; Azam, S.; Fan, G.; Whaley, A.M.; et al. Draft genome sequence of pigeonpea (Cajanus cajan), an orphan legume crop of resource-poor farmers. Nat. Biotechnol. 2012, 30, 83–89. https://doi.org/10.1038/nbt.2022.
[10] Xu, W.; Zhang, Q.; Yuan, W.; Xu, F.; Aslam, M.M.; Miao, R.; Li, Y.; Wang, Q.; Li, X.; Zhang, X.; et al. The genome evolution and low-phosphorus adaptation in white lupin. Nat. Commun. 2020, 11, 1069. https://doi.org/10.1038/s41467-020-14891-z.
[11] Schmutz, J.; McClean, P.E.; Mamidi, S.; Wu, G.A.; Cannon, S.B.; Grimwood, J.; Jenkins, J.; Shu, S.; Song, Q.; Chavarro, C.; et al. A reference genome for common bean and genome-wide analysis of dual domestications. Nat. Genet. 2014, 46, 707–713. https://doi.org/10.1038/ng.3008.
[12] Jaillon, O.; Aury, J.M.; Noel, B.; Policriti, A.; Clepet, C.; Casagrande, A.; Choisne, N.; Aubourg, S.; Vitulo, N.; Jubin, C.; et al. The grapevine genome sequence suggests ancestral hexaploidization in major angiosperm phyla. Nature 2007, 449, 463–467. https://doi.org/10.1038/nature06148.
[13] Mizuuchi, Y.; Shimokawa, Y.; Wanibuchi, K.; Noguchi, H.; Abe, I. Structure function analysis of novel type III polyketide synthases from Arabidopsis thaliana. Biol. Pharm. Bull. 2008, 31, 2205–2210. https://doi.org/10.1248/bpb.31.2205.
Note: PKS, polyketide synthase; CHS, chalcone synthase.

## Sheet: Supplementary Table S6
Supplementary Table S6. Statistics of alignment rate for transcriptome data mapping to Senna tora genome.
Species	SRR ID	Sample name	Alignment rate in genome (%)
Senna tora[1]	SRR7778020	Leaf-1	97.39
	SRR7778021	Leaf-2	98.78
	SRR7778013	Leaf-3	98.52
	SRR7778010	Young Seed-1	99.28
	SRR7778009	Young Seed-2	99.16
	SRR7778015	Young Seed-3	99.4
	SRR7778016	Mature Seed-1	99.23
	SRR7778024	Mature Seed-2	96.33
	SRR7778025	Mature Seed-3	98.99
Senna obtusifolia[2]	SRR7124549	Leaf-1	96.91
	SRR7126111	Leaf-2	96.81
	SRR7130744	Leaf-3	96.57
	SRR7130745	Leaf-4	97.37
	SRR7130794	Leaf-5	96.55
	SRR7130795	Leaf-6	97.28
	SRR7124545	Seed-1	97.16
	SRR7136876	Seed-2	97.2
	SRR7136877	Seed-3	97.09
	SRR7137033	Seed-4	97.15
	SRR7137034	Seed-5	97.8
	SRR7137909	Seed-6	97.9
[1] Kang, S.H.; Lee, W.H.; Lee, C.M.; Sim, J.S.; Won, S.Y.; Han, S.R.; Kwon, S.J.; Kim, J.S.; Kim, C.K.; Oh, T.J. De novo transcriptome sequence of Senna tora provides insights into anthraquinone biosynthesis. PLoS ONE 2020, 15, e0225564. https://doi.org/10.1371/journal.pone.0225564.
[2] Deng, Y.; Zheng, H.; Yan, Z.; Liao, D.; Li, C.; Zhou, J.; Liao, H. Full-length transcriptome survey and expression analysis of Cassia obtusifolia to discover putative genes related to aurantio-obtusin biosynthesis, seed formation and development, and stress response. Int. J. Mol. Sci. 2018, 19, 2476. https://doi.org/10.3390/ijms19092476.

## Sheet: Supplementary Table S7
Supplementary Table S7. Expression value of all genes from transcriptome in Senna tora.
	TPM (Senna tora)									TPM (Senna obtusifolia)
	Leaf-1	Leaf-2	Leaf-3	Young Seed-1	Young Seed-2	Young Seed-3	Mature Seed-1	Mature Seed-2	Mature Seed-3	Leaf-1	Leaf-2	Leaf-3	Leaf-4	Leaf-5	Leaf-6	Seed-1	Seed-2	Seed-3	Seed-4	Seed-5	Seed-6
Gene ID	SRR7778020	SRR7778021	SRR7778013	SRR7778010	SRR7778009	SRR7778015	SRR7778016	SRR7778024	SRR7778025	SRR7124549	SRR7126111	SRR7130744	SRR7130745	SRR7130794	SRR7130795	SRR7124545	SRR7136876	SRR7136877	SRR7137033	SRR7137034	SRR7137909
G2W53_000001	11.4788	12.301	11.8268	6.555	5.47002	5.10885	5.95366	6.19061	8.63864	25.0558	24.4067	15.925	16.7965	16.6825	16.4167	7.84593	11.8479	7.52223	12.0661	14.2706	14.2502
G2W53_000002	0	0	0	0	0	0	0	0	0	0	0	0	0	0	0	0	0	0	0	0	0
G2W53_000003	29.9225	30.0643	29.4489	16.3147	12.548	14.568	3.01232	3.93783	4.6733	140.299	141.084	126.773	130.805	128.568	130.523	3.95109	8.94344	3.99974	8.54446	10.4385	10.5105
G2W53_000004	0	0	0	0	0	0	0	0	0	0.138615	0.289882	0.192624	0.874421	0.200822	0.784659	1.13943	0.148414	1.69168	0.46264	2.39115	2.03262
G2W53_000005	31.8472	34.467	27.5091	27.6356	23.8162	26.9553	26.0996	28.4727	27.2079	16.8188	15.9877	19.5357	18.6399	19.1365	18.1518	19.2406	33.1054	18.7398	33.3121	31.8057	33.1417
G2W53_000006	9.16184	13.4201	11.8751	17.3849	15.0955	16.882	13.2781	11.5712	10.7739	14.7127	14.2665	11.3585	7.4227	11.3865	8.00814	11.313	23.2927	11.392	22.9437	30.5606	29.3059
G2W53_000007	7.7869	8.62962	7.8817	12.7739	9.61143	11.354	6.28793	7.46077	11.3144	5.92863	5.91883	3.64321	3.6245	3.53929	3.62586	4.02715	6.85813	3.94354	6.59578	9.76454	10.0167
G2W53_000008	48.764	52.0904	50.2792	34.4587	33.7194	34.4443	46.0195	39.1499	45.9827	25.9933	26.3037	19.3337	19.8154	18.7154	20.0534	11.9063	13.8454	11.3778	14.0223	16.2559	16.2312
G2W53_000009	0	0	0	0	0	0	0	0	0	0	0	0	0	0	0	0	0	0	0	0	0
G2W53_000010	29.3392	25.2604	25.9911	19.078	18.7345	16.8261	3.08069	5.31092	4.89972	100.885	105.304	89.8782	106.055	89.6043	103.981	6.622	7.33683	6.55742	7.23003	9.0617	9.2147
G2W53_000011	31.2898	24.8584	29.8234	19.5064	21.5475	17.0331	4.35452	5.99585	6.57466	82.9897	80.6386	94.003	82.9411	95.8388	84.2887	5.36194	6.25712	5.38602	5.70003	8.31286	8.58065
G2W53_000012	5.27153	6.61855	8.98921	6.79734	9.4492	6.36499	1.59367	2.52537	4.31497	117.843	113.163	83.5505	119.202	89.4293	136.138	0.732189	5.14998	0.752582	6.24307	14.6423	10.9156
G2W53_000013	18.9664	15.8518	16.4247	13.3429	9.59919	14.6683	9.63282	8.23084	8.94956	24.0442	23.8616	18.3769	20.703	18.304	20.4574	1.29768	1.66166	1.12862	1.45909	2.41764	2.31237
G2W53_000014	0.405243	1.15421	0.537472	1.11765	0.726396	0.993703	0.0952864	0.129423	0.164179	0.499615	0.474924	1.1361	1.9647	1.25025	1.8426	0.746708	0.778089	0.682227	0.859022	0.875679	0.808742
G2W53_000015	0	0	0	0	0	0	0	0	0	0	0	0	0	0	0	0	0	0	0	0	0
G2W53_000016	0.205618	0.225889	0.204533	95.2903	28.1956	157.182	581.987	541.028	562.458	0	0	0.35272	0	0.367732	0	193.885	263.976	189.436	269.113	362.902	370.516
G2W53_000017	0	0	0	1.48264	7.12691	14.0495	0.171132	0.484251	0.105307	0	0	0	0	0	0	2.16217	2.76509	3.23257	2.39427	2.18378	2.47955
G2W53_000018	14.5088	14.3705	13.8366	108.664	142.997	117.762	11.3457	16.8799	14.899	11.1522	11.7071	8.23684	7.16173	8.71462	7.33196	62.0773	42.2153	64.3009	42.3505	60.1908	61.348
G2W53_000019	10.7784	12.7925	13.3913	3.25065	2.73589	3.56328	1.56781	2.30447	2.81389	3.84552	3.8205	3.85712	4.29324	3.87505	4.37082	1.30904	2.61524	1.28865	2.58268	2.38635	2.28351
G2W53_000020	0	0.152853	0.092268	28.3746	31.2583	23.7809	0.0588883	0.166636	0.434849	0.0423223	0.0442538	0.117625	0	0.122631	0.0399291	19.0955	28.9559	18.4752	28.9572	27.0557	27.351
G2W53_000021	0.0190171	0	0	0	0	0	0	0	0	0.0164696	0	0	0	0	0.0155382	0	0	0	0	0	0
G2W53_000022	43.9334	44.9695	47.2915	16.0975	12.2194	13.8055	13.9713	17.3353	20.2025	41.5364	41.9396	34.0447	45.0437	33.9101	45.1621	3.1848	5.86137	3.30743	5.71854	6.78329	6.85988
G2W53_000023	94.9068	122.012	129.108	70.5877	83.3583	77.1143	38.534	43.9396	48.9834	116.319	116.904	67.7601	87.632	67.9832	88.5734	33.0656	38.2307	33.2565	38.8593	42.2092	41.9399
G2W53_000024	140.281	122.065	152.518	85.2148	93.014	83.0081	191.705	162.74	158.397	129.425	132.749	130.249	117.647	131.402	117.87	78.7381	89.1782	78.0859	87.7922	94.8815	93.7054
G2W53_000025	199.12	190.305	182.222	48.0363	54.2789	44.9391	1.25485	2.72706	2.40921	34.7026	36.9156	30.1449	56.4522	31.1788	55.3691	5.99361	9.57279	6.21435	9.6599	11.6894	11.6157
G2W53_000026	0	0	0	0	1.49987	1.1787	0	0.601279	1.96135	0	0	0	0	0	0	0	1.43055	0	0	1.35577	0
G2W53_000027	0	0	0	0	0	0	0	0	0	0	0	0	0	0	0.796131	0	0	0	0	0	0
G2W53_000028	12.9899	12.9582	11.2876	9.60219	9.03269	8.46562	5.68743	4.694	6.53297	5.2967	5.50749	4.13255	5.62662	4.45848	5.49969	2.9729	5.79789	3.04181	5.7446	6.00524	5.91975
G2W53_000029	140.061	139.779	121.97	29.2732	35.6028	36.7032	52.2536	49.2961	44.6099	78.3899	79.2839	66.192	69.2069	67.8261	69.0413	21.8414	19.4009	21.5736	19.4235	15.8615	16.4946
G2W53_000030	39.9909	45.6927	43.3531	33.9501	47.3236	35.6354	2.61031	3.85648	3.5169	17.4817	17.1392	17.5884	15.0394	17.1879	15.246	25.6857	37.2228	25.5325	36.9125	51.0711	50.8125
G2W53_000031	94.4648	88.4408	83.5839	30.4837	34.1813	36.3536	19.5713	27.6588	24.2244	308.671	310.079	275.787	241.136	272.299	242.532	51.5609	43.2771	50.8467	40.921	39.921	38.9491
G2W53_000032	18.8352	20.79	20.5075	14.3181	17.2003	14.6462	0.169614	0.0639942	0.104373	5.75874	5.40489	9.68981	10.098	10.0519	10.768	8.4916	15.1175	8.27216	15.5924	18.1642	18.8221
G2W53_000033	6.08508	6.89259	6.04043	45.5004	49.2079	48.6802	18.5081	15.1549	16.8326	2.1489	2.06879	2.1048	1.63796	2.26295	1.67014	19.0649	35.2724	18.9382	35.1446	38.2699	38.7789
G2W53_000034	0	0	0	0	0	0	0	0	0	0.299684	0.626723	0.832902	0	0	0.282738	0	0	0	0	0	0
G2W53_000035	64.6018	58.6137	58.1532	22.2927	26.8723	20.4034	5.10861	5.22924	6.04123	41.2065	42.9431	25.9253	32.2375	25.4505	32.6864	4.81455	6.16684	4.84285	6.05954	7.49615	7.55403
G2W53_000036	1.20492	0	0.399521	0	0.719939	0.282888	0.254986	0	0	1.28265	0.670593	0.891205	0.57795	1.85827	0	0.585751	0	0.602066	0	0	0
G2W53_000037	114.937	119.532	116.254	160.88	191.64	156.226	191.188	180.916	179.994	103.395	101.971	113.067	96.8839	115.539	94.4308	105.771	109.447	106.648	108.658	128.539	130.757
G2W53_000038	0.388684	0	0	0.219269	0.928954	0.547526	0.0822537	0.465506	0.202462	0	0.0848136	0.0375719	0.121828	0	0	0.0246944	0.0289487	0	0.0300798	0.0548708	0.0283192
G2W53_000039	124.337	94.7706	113.308	12.8893	9.83388	10.2479	1.38147	2.27923	1.91632	92.4231	93.1078	50.2626	81.1385	49.977	81.689	4.32503	6.67527	4.21466	6.74195	10.4553	10.1358
G2W53_000040	58.075	43.7261	41.2118	7.19538	5.99949	6.75364	1.03373	1.04005	1.55494	88.533	97.8795	76.6677	84.0655	81.182	85.5639	5.52223	9.9416	5.57468	10.9306	9.75056	9.72541
G2W53_000041	30.5547	33.6197	28.5963	49.2212	59.0396	48.5595	4.2227	7.12343	7.44563	6.91837	6.84496	5.55622	5.53814	5.94477	5.4648	10.5547	15.2338	10.6157	15.2239	16.8098	16.7716
G2W53_000042	26.6461	28.7058	26.1177	39.6036	45.1001	39.8359	4.57531	8.55545	9.79645	27.9457	27.6691	13.0261	17.5286	13.7503	16.84	27.6466	31.6777	26.9316	33.0675	43.1203	43.3435
G2W53_000043	75.8654	74.4149	73.8796	21.3091	22.1886	22.1895	17.9772	17.6375	15.7738	59.2653	60.3371	40.6902	47.9553	41.6866	50.4625	9.09293	10.4086	9.30954	10.9022	14.3808	13.5764
G2W53_000044	0	0	0	0	0	0	0	0	0	0	0	0	0	0	0	0	0	0	0	0	0
G2W53_000045	1.81256	6.22662	1.48819	10.0305	7.65838	8.97704	0.566231	1.88137	1.66349	0.368719	0.424101	0.461145	0.332283	0.641029	0.313082	11.1133	13.1069	11.0075	13.7831	13.3571	13.2853
G2W53_000046	68.8925	61.8957	68.6214	67.6587	84.3262	77.5323	20.5406	31.9346	22.6645	44.2129	42.8224	29.2681	41.4256	32.33	39.505	29.4657	29.1728	30.6787	32.7302	38.9273	37.7302
G2W53_000047	28.0017	29.8301	32.3555	64.3832	75.5429	51.7964	23.703	43.6986	28.9506	7.27032	6.67503	4.68191	5.99257	4.75272	6.3573	5.83052	5.79076	4.32821	5.42518	5.21814	5.29337
G2W53_000048	12.5084	13.8575	11.8386	10.8302	13.8832	13.2523	4.38939	5.08203	5.17528	20.9871	21.092	14.1462	13.6266	14.7483	13.807	6.70467	7.72539	6.99448	7.53863	9.10417	9.06887
G2W53_000049	2.38407	2.90225	2.00829	10.7412	10.5296	9.95404	1.93626	3.30285	4.12827	0.84237	0.763372	2.65333	1.164	2.88829	1.45702	12.4126	13.2883	12.5474	14.1512	18.6341	18.7638
G2W53_000050	0	0.118357	0	0	0	0	0	0	0	0.0563059	0.0588756	0	0.101484	0	0.106244	0	0.0301433	0	0.0313211	0	0
G2W53_000051	109.955	118.208	113.115	127.135	165.542	136.205	124.922	120.256	122.427	79.4588	79.1953	74.2326	78.1775	74.6973	80.7214	78.4173	76.5527	75.9217	75.4052	87.3478	87.7459
G2W53_000052	7.56578	7.73019	7.49488	0.184424	0.139523	0.197364	0.118598	0.246105	0.218941	11.5627	11.3703	19.5434	6.46764	18.6422	6.29225	0.695221	0.543329	0.578473	0.564558	0.441365	0.341687
G2W53_000053	8.17291	7.15849	6.26048	1.91951	1.8138	1.53505	0.0141188	0.0159808	0.0347526	3.94764	4.10695	4.18359	4.33014	4.33275	4.34514	0.509877	1.98528	0.467927	1.9963	2.4682	2.38064
G2W53_000054	7.81289	7.39633	5.83354	0.212213	0.242054	0.298921	0.0367416	0.083174	0.0301456	15.1348	15.2096	11.4832	19.0434	11.4547	18.9432	0.0978063	0.573282	0.134041	0.714817	0.579533	0.560815
G2W53_000055	6.14871	6.19714	6.24718	0.381873	0.438165	0.370827	0.0477503	0.0810713	0.117534	7.21229	7.17712	5.27751	6.46819	5.14878	6.34425	0.127291	0.484967	0.130836	0.542679	0.42426	0.510915
G2W53_000056	0.253135	0.55618	0.335732	0.142801	0	0.118861	0	0	0	0.644188	0	0	0.38702	0	0	0.392244	0.45982	0.604753	0.477786	1.30735	1.12455
G2W53_000057	0.654848	0	0.434261	0	0.391271	0	0	0	0	0	0	0	0	0	0.657673	0	1.49275	0	1.55107	0	0
G2W53_000058	0.0584913	0.0642577	0.0581826	0.544447	0.489279	0.302114	0.012378	0	0.0304675	0.116534	0.121852	0.188929	0.157527	0.112554	0.219888	0.283829	0.644657	0.291734	0.648238	0.433582	0.406864
G2W53_000059	38.5273	40.389	40.2652	37.396	33.4016	36.7134	47.3603	37.366	40.9239	25.1518	25.4043	20.0102	19.0935	19.7591	20.2584	12.9201	29.7826	12.9822	29.6054	27.4533	27.1749
G2W53_000060	281.494	275.646	344.644	255.291	280.942	280.937	291.183	296.41	279.729	77.702	79.4746	87.5491	60.7066	89.52	60.6583	74.8788	71.4338	74.0829	74.8539	82.6164	81.5553
G2W53_000061	53.3201	54.6855	62.3189	3.66628	4.39333	4.32129	0.762951	2.11347	2.12505	38.1588	38.5896	10.5729	30.6839	10.9385	30.6105	3.59438	4.11998	3.55766	4.28096	4.11167	4.24412
G2W53_000062	0	0	0	0.128521	0.136123	0.0475442	0.139278	0.133393	0.290082	0.0468272	0.0326429	0.0216909	0	0	0.0294528	0.213847	0.802203	0.219803	0.711989	0.966173	1.01365
G2W53_000063	0.938678	0.437487	0.339536	0.192559	0.152962	0.0801383	0.0722341	0.163521	0.133349	0.126995	0.199186	0.0882381	0	0.0919936	0	0.0579952	0.0679865	0.0596105	0.0706429	0.128865	0.133016
G2W53_000064	35.1588	32.4557	37.5234	7.07626	7.27598	10.6621	13.7181	11.2287	10.1108	35.6964	34.343	38.4347	43.0347	36.3139	43.5855	9.07835	8.14372	8.80379	8.79847	8.77045	8.73613
G2W53_000065	0	0	0	0	0	0.288662	0	0	0	0	0	0.909393	0	0	0	0	0	0	0	0	0
G2W53_000066	0	0.735394	0	0.566445	1.1999	0	0	0	0	0	0	0	0	0	2.01686	0	1.14444	0	1.18916	0	0
G2W53_000067	123.881	111.688	127.097	59.2643	65.9194	71.0757	40.001	43.4725	39.4231	143.763	146.796	137.798	96.5558	137.105	97.9016	65.4648	60.0904	64.7388	60.1495	49.6844	48.8715
G2W53_000068	31.2559	25.6445	32.3373	9.23741	9.75302	10.4209	3.24726	5.13091	5.57895	11.8328	11.9883	5.81678	6.15055	6.01734	6.13291	2.78584	4.36596	2.69081	4.41622	5.34502	5.36993
G2W53_000069	50.2941	49.2111	55.1888	20.5352	19.6746	21.1696	12.0709	16.0305	13.6033	28.3653	28.2307	16.7556	18.3576	16.5736	18.2472	8.96069	11.4867	8.806	11.6439	15.1039	14.9826
G2W53_000070	61.8966	78.5763	61.8436	3.259	2.46554	2.90639	2.61972	3.55825	3.65402	205.828	207.8	260.685	248.958	269.091	253.115	1.59569	1.98751	1.12759	2.06516	0.554002	0.686219
G2W53_000071	0.452298	0.265007	0	0.0510311	0	0.509709	0.0382862	0	0.141358	0.0774858	0.0405111	0.107677	0.0349144	0	0.146208	0.0707714	0.124446	0.109114	0.129308	0.157254	0.162319
G2W53_000072	6.28333	3.97023	5.0655	0.347512	0.809747	0.289252	0	0.0590212	0.064175	14.3929	14.7839	9.25836	8.96029	8.80505	9.38058	0.418062	0.735128	0.501323	0.650688	0.464465	0.426158
G2W53_000073	42.3561	43.554	40.1396	4.02894	4.43624	4.78121	0.209496	0.338749	0.441994	43.7095	43.0588	55.1253	42.1637	54.0248	42.0751	1.01745	3.23453	0.886259	3.25588	3.35283	3.22352
G2W53_000074	28.8133	29.4957	36.6951	16.8086	16.0421	18.4492	1.66295	3.29396	2.55828	19.3549	18.7927	25.9357	26.3712	23.8682	26.7385	21.0449	25.6574	23.1453	26.5317	26.7711	26.0648
G2W53_000075	0.0950253	0.278383	0	0	0.0567775	0.133859	0	0	0	0	0	0.129494	0.0839773	0.0900034	0.0879163	0.0567405	0.0332579	0.0291604	0.0691147	0.0315193	0.0325346
G2W53_000076	12.8207	12.0488	11.2107	10.8809	14.4734	11.9069	9.05178	8.23446	9.24899	3.84589	3.81656	3.18083	2.51808	2.94276	2.55837	2.00587	2.19688	2.14885	2.20242	2.81441	2.82948
G2W53_000077	72.6123	63.8632	66.2363	27.0105	34.8602	32.6066	8.45481	13.5193	9.90997	135.353	132.707	204.039	112.548	207.344	114.324	47.4767	44.8139	45.6302	51.8222	37.3335	27.5764
G2W53_000078	0.144822	0.212133	0.0960386	1.26633	3.20165	2.31207	0	0	0	0.0737437	0	0	0	0	0.139147	1.0103	2.01341	0.899983	1.96901	4.71426	4.05511
G2W53_000079	0.375755	2.52266	0.124591	7.41913	9.72891	8.67485	0	0.0300014	0.0652423	0.223199	0.291731	0.0775411	0.150857	0.242524	0.0526444	9.98903	17.7441	9.69102	18.127	17.2129	17.0076
G2W53_000080	1.52307	1.36337	1.23447	9.06948	6.67359	12.4757	70.4078	63.641	54.2125	4.86398	4.14411	1.50203	5.84444	0.260993	4.92885	19.0863	14.2734	18.434	16.8352	19.3768	22.454
G2W53_000081	4.05802	4.65813	4.96813	36.8262	25.902	50.733	267.95	233.134	247.74	6.81486	6.41494	3.40574	7.93684	3.25289	7.99585	25.966	27.4259	25.5165	27.2134	28.5112	28.32
G2W53_000082	2.8418	1.77857	3.08378	0.61211	0.185233	0.291137	0.0218685	0.0742574	0.188397	14.4081	14.6119	12.182	8.94302	11.443	9.17142	0.687046	0.867365	0.597539	0.965631	0.645875	0.515163
G2W53_000083	33.923	32.1819	34.6831	40.0279	44.2119	40.2272	6.49163	9.39981	9.3209	53.4817	54.0972	47.541	44.5878	47.1097	46.098	11.2388	16.8765	11.102	16.4316	18.9638	19.3955
G2W53_000084	140.18	120.98	151.322	11.3289	12.4695	12.5728	16.6658	19.5239	21.0236	76.4104	78.4635	37.2999	98.6989	38.0359	99.7239	9.84205	14.4745	9.65635	14.3861	21.372	22.7787
G2W53_000085	42.6743	44.3863	40.1899	32.9752	44.5677	43.1068	34.6053	47.7587	33.9967	12.2949	13.5015	10.0797	12.7953	9.76337	12.5703	10.0079	13.109	10.1417	12.9345	12.737	12.5546
G2W53_000086	23.8993	35.7365	22.6175	33.2845	33.9145	33.0816	2.42342	4.65122	3.2419	3.70245	4.1431	1.62475	1.52195	1.97622	1.59334	6.7039	7.85885	6.89062	7.87686	7.9094	7.75598
G2W53_000087	1.1554	1.8133	1.53241	1.02426	1.03553	0.716909	0	0	0	0.416625	0.435639	0.405269	0.826001	0.422517	0.786132	0.532732	0.802942	0.547569	0.880666	0.507311	0.567292
G2W53_000088	0.379247	0.119039	0.646706	0	0.356085	0.0763188	0	0	0	0.141991	0.111353	0.147986	0.415868	0.205713	0.368394	0.0648433	0.114022	0.0666493	0.118477	0	0
G2W53_000089	3.9216	2.61964	5.22978	1.1183	0.437731	1.05223	0.638378	0.763856	0.538739	2.04799	1.9749	0.0948651	0.0410136	0.164838	0.032203	0.280579	0.182731	0.288393	0.151897	0.196269	0.226426
G2W53_000090	121.893	104.409	121.366	55.92	58.0765	57.9757	62.9312	58.0584	61.3035	40.5787	43.6187	35.4878	24.1842	35.0385	24.2466	16.8016	19.9859	16.8125	20.1046	18.6666	17.3411
G2W53_000091	3.55297	3.50726	2.66347	1.30718	0.553799	1.52324	0.58843	0.518025	0.563259	1.26009	1.43053	1.75106	5.09384	1.51263	6.24986	0.0986482	0.154191	0.101396	0.160216	0.0730652	0.0377095
G2W53_000092	60.8671	58.9642	66.8785	10.0734	8.7673	11.7749	19.1897	17.4805	18.8451	40.7962	40.8354	44.2741	41.9942	45.0396	42.486	5.17906	11.1977	4.88833	11.0461	10.2765	10.3764
G2W53_000093	0.175134	0.897865	0	0.889187	1.9882	1.23352	0	0	0	0.0649552	0	0.0902639	0.0585365	0	0.0612822	1.72047	2.36461	1.46349	1.95115	2.30691	2.31319
G2W53_000094	32.3823	32.5412	37.788	49.1391	51.9706	54.9275	38.9917	34.0925	31.7085	20.3298	20.2437	16.2164	18.7728	16.8581	19.3695	18.9346	23.5571	18.5517	23.6963	25.9561	26.407
G2W53_000095	46.3506	41.7751	68.6918	0.657807	1.21925	0.95817	0	0	0	101.81	103.614	109.512	54.7168	109.981	54.5211	1.43254	1.67934	1.27612	1.5123	0.707356	0.803157
G2W53_000096	0	0.711672	1.28878	0	0.580596	0	0	0	0	0	1.0816	0	0	0	0	0	0	0	0	0	0
G2W53_000097	4.56784	5.15379	3.76597	2.15899	1.32776	0.347813	0.78377	1.47855	1.09321	1.10177	1.22406	1.24399	1.17907	1.19717	0.974505	1.06919	1.47458	1.61614	1.5322	1.81675	1.58677
G2W53_000098	35.104	35.959	30.7348	16.1102	9.12679	4.47721	4.43717	7.11308	10.5264	16.5428	15.2878	14.2463	15.433	14.5151	15.3875	15.0029	24.1985	14.8192	24.4636	30.2332	28.8887
G2W53_000099	1.39131	2.36146	1.96245	7.4377	5.89833	5.24712	2.87888	3.30086	4.31382	0.754387	0.828756	0.875812	1.30805	0.98226	1.2703	4.57891	7.98518	4.5899	7.74474	12.3836	12.0924
G2W53_000100	59.9186	67.1447	86.1575	8.82915	10.4861	8.97863	23.1151	11.1995	16.5094	309.938	309.647	424.012	326.167	430.222	332.444	18.9145	20.6135	19.144	20.5734	26.0907	26.4005
G2W53_000101	105.946	108.883	126.388	64.6781	92.7298	83.0379	19.2452	21.5089	18.1369	258.237	261.735	215.855	228.433	219.389	240.183	104.344	94.1226	103.702	97.122	116.049	114.169
G2W53_000102	283.554	278.011	196.39	1.86968	2.06828	2.21331	12.687	11.7139	14.6933	87.6373	86.6454	203.91	129.01	204.921	127.425	5.63951	4.11109	5.55303	4.73353	2.05339	1.84781
G2W53_000103	3.28615	5.0809	2.5424	14.0066	16.1441	13.1157	0.154537	0.962046	0.760765	0.274592	0.23927	0.381582	1.23729	0.72934	1.25214	4.93235	4.01806	4.85491	4.6333	5.15475	5.22493
G2W53_000104	0.885971	0.648877	0	0	0.529367	1.04003	0.93745	1.06108	0.461494	1.22702	0.256605	1.36409	2.4327	1.77768	2.54681	1.79312	1.57652	1.61268	1.91114	3.23724	2.5704
G2W53_000105	5.36846	6.98988	3.95565	12.9553	10.1576	9.9431	10.6034	7.14391	8.23378	2.04806	1.57466	2.59493	7.21986	2.26902	7.16069	2.80588	5.67562	2.43164	5.42827	8.25175	8.76995
G2W53_000106	213.629	221.008	208.019	18.0141	15.9633	15.9437	2.52283	2.90654	3.27122	141.209	143.035	195.058	264.84	196.849	265.749	3.05467	5.19372	2.94801	4.91379	5.36262	5.45515
G2W53_000107	1.99849	2.37847	2.58156	3.54664	2.9728	4.42807	1.33044	1.29647	1.44221	1.11789	1.01201	1.1677	0.750497	1.07609	0.721994	1.71998	2.56254	1.65519	2.46234	2.52755	2.42823
G2W53_000108	4.61563	4.27003	6.12169	5.07059	6.02368	4.44865	1.54226	2.56028	1.83481	1.63568	1.3362	1.27856	0.967345	1.18487	1.10917	3.64149	5.52761	3.64694	5.51612	5.49798	5.24679
G2W53_000109	1.39224	1.29775	1.42686	1.07101	1.43685	1.48576	0.0535686	0.121266	0.263711	0.264386	0.118479	0.367399	0.23826	0.383036	0.249436	0.586441	0.606594	0.567317	0.546256	1.53302	1.58241
G2W53_000110	34.1914	34.5508	33.523	24.8552	30.1009	29.0204	20.5528	18.8262	22.0483	5.84866	5.51463	3.0067	4.61568	3.15916	4.72055	4.12218	6.37074	4.20526	6.01787	7.01539	6.86958
G2W53_000111	4.99449	7.31584	3.7261	0.0880484	0.0932564	0	0	0	0	0.90388	0.810113	0	1.51276	0	1.34006	0	0	0	0	0.393081	0.405744
G2W53_000112	8.48893	9.23302	9.01127	2.71608	2.81995	2.94489	1.62215	1.30498	1.63343	14.2881	14.2048	10.4442	11.192	10.0153	11.4705	1.63354	4.92728	1.54698	5.14216	6.79044	6.86185
G2W53_000113	14.7444	17.5333	15.4551	13.6841	13.5462	13.4	8.85742	7.89891	7.84539	7.75967	7.0579	5.90854	8.52557	6.00601	7.62174	5.43681	9.33256	4.98949	8.8694	11.1637	10.5213
G2W53_000114	5.07021	6.33458	4.15343	0.168251	0.356405	0.420131	0.126231	0	0.155354	4.87082	4.54742	3.38432	6.42748	2.77228	5.58011	0.158884	0.372512	0.163309	0.387067	0.706077	0.728823
G2W53_000115	0.164607	0	0	78.6987	82.7143	46.8775	0	0.0788562	0.085742	0	0	0.0928339	0	0.0967849	0	129.109	111.082	125.368	109.179	61.0773	60.036
G2W53_000116	18.6287	19.0622	20.4579	7.04329	7.97301	9.80183	14.7065	13.0699	12.8348	6.85049	6.7563	5.31016	4.42041	5.07313	4.31311	2.88095	3.12436	2.6742	2.99909	3.99034	3.88601
G2W53_000117	6.82198	7.52697	7.99041	10.146	9.47567	13.562	18.374	17.6988	17.9521	3.19301	2.67875	1.8058	2.10792	1.93645	2.17177	5.83264	7.076	4.98429	6.7742	6.51772	6.96102
G2W53_000118	3.50054	4.11551	2.87117	25.3601	17.9985	27.1209	22.4965	24.669	24.4239	1.68362	1.39623	3.26739	1.83116	3.44851	2.24569	10.1278	12.5253	10.0011	11.5291	14.0797	13.8035
G2W53_000119	3.76538	10.4794	11.9856	9.77117	14.3988	11.3155	9.24326	13.7092	9.0222	24.0497	23.4708	8.91205	10.1141	15.0984	16.6391	12.4472	21.4582	8.2784	12.4861	26.8442	28.5486
G2W53_000120	36.6486	37.2203	36.0618	36.8499	37.1785	34.8504	32.1383	36.3136	36.3257	19.1707	19.0183	14.2795	14.2853	14.8103	13.9533	18.9646	20.2701	19.4928	20.3532	21.8779	22.1933
G2W53_000121	4.81642	3.22856	5.30529	2.44078	1.56084	1.95492	34.3437	33.9063	34.6558	7.49097	7.81033	10.29	12.1824	10.6032	12.2461	0.786419	1.10628	0.868947	1.14951	0.589754	0.518567
G2W53_000122	15.6589	12.8963	16.7231	11.1752	11.3853	12.8156	15.7304	12.7737	13.5616	8.9613	9.34567	4.87003	7.05834	5.11138	7.05656	4.91945	7.60535	4.94606	7.4315	10.2389	9.82962
G2W53_000123	1.46942	1.34523	1.49646	0.621708	0.627125	0.591404	0.199902	0.226265	0.300694	0.732071	0.765481	0.540446	1.38131	0.530303	1.3166	0.167158	0.244946	0.193291	0.229065	0.232141	0.215657
G2W53_000124	90.2214	85.2192	87.8358	22.3246	29.2916	26.9715	13.3118	14.9966	14.2294	23.3748	23.5408	16.9196	19.357	17.0573	18.8562	5.32422	6.27221	5.2838	6.3256	6.61452	7.15845
G2W53_000125	30.8577	24.2142	20.9505	14.5065	10.9747	23.459	40.1137	40.8283	38.2702	3.53672	3.69812	1.96589	1.97029	1.77008	2.42671	0.822244	2.3409	0.845146	2.07466	6.91658	6.80263
G2W53_000126	64.4942	58.2254	64.6477	29.007	26.767	35.646	81.9132	58.6478	72.2466	9.93636	9.89272	5.91767	6.54907	6.17937	6.63199	4.93157	8.66087	4.90953	8.87837	10.5237	10.4573
G2W53_000127	46.2233	49.2587	40.6409	3.66236	2.94803	1.09741	3.07742	1.61723	6.49274	22.194	22.1311	6.22959	12.6496	6.06884	12.8962	0.604098	0.865543	0.48294	1.14464	2.08802	1.69344
G2W53_000128	43.4154	45.3143	41.2838	6.90523	4.5139	3.77184	3.03555	3.75656	5.67857	99.3367	101.204	56.2795	57.795	58.2485	61.3386	10.3895	13.0193	10.1265	12.9825	11.9407	12.7362
G2W53_000129	46.7475	67.6424	40.9885	19.3179	17.3193	19.6154	0	0.136139	0	0.287589	0.300714	0.599465	1.81419	0.416653	2.17062	19.3061	19.553	19.9789	18.2373	24.6591	29.0682
G2W53_000130	1.3097	2.87763	0	0	0.782543	0.614975	0	0	0	0	0	0	0	0	0	1.27337	2.9855	1.30884	0	2.82942	0
G2W53_000131	0	0.93219	0	5.26554	5.95724	5.47847	0.0897839	0	0	1.94184	2.15229	3.40004	1.67995	3.37595	1.68547	0.354714	2.66127	0.401053	2.59243	1.85221	1.99323
G2W53_000132	64.5117	83.5032	75.7133	36.5119	36.1858	37.5742	11.2114	11.9331	12.7693	57.566	56.821	38.672	42.1293	39.4224	42.4446	18.8268	23.9838	18.8214	24.3977	33.2701	33.5537
G2W53_000133	75.9781	75.252	106.14	18.0118	12.2353	27.32	156.07	130	153.496	56.7788	56.6435	31.7968	36.409	32.4709	36.9144	8.17483	13.4729	8.08622	13.1682	15.7415	15.6349
G2W53_000134	1.80738	0.882473	1.59808	0.679734	0	0.565777	2.03989	1.15446	1.56908	1.28265	0.670593	0	0	0	0	0	0	0	0	0.650768	1.34346
G2W53_000135	4.7923	4.51265	15.5495	0	0	0.080366	1.30391	0.0819926	0.80237	0.417801	0.436868	0.096765	0	0.100883	0	0.0635995	0.0745563	0.130742	0	0	0
G2W53_000136	18.4499	26.4512	22.5217	216.096	231.897	251.086	132.964	129.107	127.057	20.1026	19.6028	19.9235	14.486	19.5544	14.6252	227.773	204.057	225.371	203.025	216.791	216.437
G2W53_000137	35.7897	42.3762	55.1813	55.6911	37.9572	56.2976	45.4431	36.1482	32.7798	11.3249	12.1707	9.18017	4.59261	8.11246	3.38342	15.6302	27.013	15.9475	30.2383	29.9421	27.5458
G2W53_000138	22.6901	27.2191	22.8297	37.9592	28.0496	29.9421	25.9954	20.8027	21.6003	40.3951	36.5778	22.5695	10.1329	22.3234	12.5727	44.1215	95.4195	43.0047	94.0514	100.151	103.813
G2W53_000139	0	0	0	0	0	0	0	0	0	0	0	0	0	0	0	0	0	0	0	0	0
G2W53_000140	0	0	0	0	0	0	0	0	0	0	0	0	0	0	0	0	0	0	0	0	0
G2W53_000141	41.0664	41.8879	38.4243	1.59211	1.54863	1.5686	2.75463	2.06941	2.22011	67.5035	67.8761	33.3631	73.5034	32.3411	72.6071	2.89121	3.34529	2.93314	3.24731	3.00354	2.885
G2W53_000142	0	0	0	0	0	0	0	0	0	0	0	0.0709182	0.0229954	0.0739365	0	0	0	0.0239549	0	0	0
G2W53_000143	0.395056	0.506337	0.196486	2.56293	2.00639	2.41151	0.543414	0.804334	0.874568	0.689372	0.589772	0.435442	0.225909	0.453975	0.118253	1.31651	1.81172	1.35318	1.67334	2.79809	2.56002
G2W53_000144	0	0	0.0979217	0	0	0	0	0	0	0	0	0	0	0	0	0	0	0	0	0	0
G2W53_000145	0.792711	1.16115	1.8399	2.90676	3.31551	2.41944	0	0.189878	0	0.169663	0.177406	1.17884	0.152897	0.983212	0.160069	0.154961	1.63491	0.47783	2.45381	1.72161	1.24395
G2W53_000146	0.808672	1.92486	1.34067	2.28099	2.4159	2.75294	0	0.0968503	0.105307	1.05713	1.30635	0.534189	0.43303	0.556924	0.0906682	1.22885	4.11587	1.35329	3.52827	3.21808	4.12702
G2W53_000147	22.8433	26.2772	21.1889	9.43737	7.66007	6.80279	0.523633	0.592689	0.999354	48.9853	48.9884	54.6543	88.5543	54.9391	89.0708	3.78957	7.90382	3.76528	7.86645	8.89404	9.09907
G2W53_000148	24.4676	22.2344	21.148	8.10895	8.04886	8.5014	7.56316	6.45336	7.16007	31.8166	30.3481	27.7318	32.2475	27.9444	32.2134	3.58623	6.47946	3.66712	6.66508	6.90063	6.91094
G2W53_000149	2.73846	4.01124	3.02667	3.60465	2.72704	4.28619	0	0.437294	0.475478	1.94341	3.04815	1.35031	6.12978	0	2.75027	1.775	7.2828	3.64888	9.72946	6.90208	3.05333
G2W53_000150	0.645493	1.10309	0.570744	0.728286	0.257121	0.303095	0.0910666	0	0.112077	0.282384	0.196847	0	0.424132	0.27274	0.355221	0.0859713	0.201565	0.0883658	0.314161	0.859625	0.197182
G2W53_000151	3.15671	4.79605	3.87495	3.3532	3.91271	3.12218	0.540105	0.643509	0.612238	2.29863	2.1789	1.76131	1.89725	1.8674	1.72276	2.35452	3.51919	2.29909	3.2743	3.24803	3.33016
G2W53_000152	4.30329	3.87207	4.1311	1.36409	1.5917	2.30929	10.2168	6.93066	8.51785	1.80836	1.89089	1.0505	0.81483	0.83751	0.72719	0.87998	1.06332	0.862744	1.07189	1.09798	1.13335
G2W53_000153	16.5295	16.7894	16.989	15.6321	14.6823	16.1839	25.0901	21.0969	23.9656	8.71376	8.96931	5.12058	5.55268	5.22912	5.42844	8.04143	11.2701	8.23705	11.1728	12.5505	12.6068
G2W53_000154	60.1246	59.9583	58.5185	51.2884	51.3102	47.1385	20.949	24.6718	27.9334	40.7282	40.5624	27.4234	29.1568	28.7595	29.9742	20.5382	21.2293	20.8475	21.41	28.2383	29.3923
G2W53_000155	17.732	21.5924	24.7929	6.62861	5.61655	7.12236	5.96777	5.4243	4.67385	10.2029	8.1284	10.1273	7.9906	10.2064	8.25081	3.10626	4.29165	3.07874	4.7296	4.68356	4.96165
G2W53_000156	34.291	27.5657	29.4824	9.22699	4.98071	7.02773	1.33641	1.69417	1.54605	53.2694	52.8052	46.0133	30.2063	44.3247	30.7097	2.03386	3.98066	2.05415	4.15774	3.63502	3.63043
G2W53_000157	59.9783	55.988	62.1476	21.9781	24.158	28.8546	42.7811	35.7881	38.6342	38.1689	37.0073	32.6354	33.2095	33.4107	32.7247	10.5745	10.431	10.1621	11.4145	11.3661	11.4858
G2W53_000158	43.0773	48.5579	46.8938	43.7843	36.7992	38.633	43.8886	45.853	56.2938	19.0912	19.0745	12.2138	13.4953	12.1621	13.6029	22.0314	24.1425	21.4034	23.5835	28.0649	28.2254
G2W53_000159	0	0	0	0.322658	2.05046	0.358086	0	0.274	0	0	0	0	0	0.133114	0	0.923103	0.590256	0.517535	0.613318	1.3985	1.63602
G2W53_000160	13.3724	9.48452	10.0814	6.90851	5.29862	10.0465	17.2771	21.8483	12.4646	7.93517	8.93557	16.286	17.4925	15.2105	19.4648	16.8366	12.8096	17.5348	12.631	9.29078	10.1015
G2W53_000161	69.9339	62.6378	65.4491	27.5822	16.28	14.2866	12.7493	16.6787	18.687	28.1446	28.0504	25.369	27.1457	26.3018	27.7013	16.9982	21.3383	17.2336	22.0593	19.7083	18.9622
G2W53_000162	0.912819	1.55993	0.908001	0.386212	0.454507	0.321464	0.998053	0.655941	0.475478	0.727204	0.760392	0.721819	0.608533	0.451524	0.637076	0.521862	0.500538	0.487634	0.577884	0.26354	0.27203
G2W53_000163	81.8308	83.4947	81.3083	46.8955	37.2213	26.5569	148.453	143.293	167.262	60.1199	62.2236	60.4848	50.6856	61.187	51.0739	64.7556	66.4819	65.8888	67.7933	75.0143	76.0061
G2W53_000164	12.2906	9.966	11.0614	1.05241	1.01631	1.15938	0.116114	0.262854	0.114323	13.9418	12.6915	15.8411	11.6034	15.9807	11.9155	0.749042	0.834182	0.769905	0.729917	1.20667	1.11669
G2W53_000165	10.7988	25.3919	17.7146	85.9286	101.878	71.7896	0	0	0	86.5183	96.7932	54.6494	26.7166	57.8518	26.2573	69.627	124.377	70.4303	121.832	99.457	103.928
G2W53_000166	0	0	0	0	0	0	0	0	0	0	0	0	0	0	0	0	0	0	0	0	0
G2W53_000167	11.1092	11.4612	11.1391	7.08056	7.27598	6.33238	13.1449	12.2942	13.4651	2.63606	2.84824	1.53853	1.93213	1.73131	1.9896	4.23744	4.55351	4.22348	4.49681	6.25921	6.42403
G2W53_000168	13.5972	14.7079	16.3692	24.6639	21.6232	20.9219	6.02051	6.91471	7.62746	5.48644	5.34789	5.62118	8.33824	6.33195	8.46615	6.83707	8.06473	6.24181	8.17293	9.86059	9.54515
G2W53_000169	12.7795	9.02529	9.08001	0.128737	0	0	0.772686	1.4212	1.66417	27.5691	31.4852	55.1569	86.5164	53.2553	87.6229	0.357165	0.837395	0.367113	1.08764	0	0
G2W53_000170	0.186174	0.190893	0.172846	0.168043	0.0667434	0.0874191	0.0787968	0.0713508	0.193953	1.06401	1.11257	0.956727	0.874258	1.04278	1.03336	0.428738	0.368574	0.323165	0.348159	0.412816	0.426115
G2W53_000171	0	0.321289	0	0	0	0	0	0	0	0	0	0	0.105981	0	0	0	0	0	0	0	0
G2W53_000172	49.0517	36.3722	49.9401	23.9974	26.7545	30.7737	11.8879	14.7232	12.5102	16.5402	16.2539	16.1432	15.0553	14.9869	15.083	7.62925	9.71359	7.11469	10.5239	11.5634	11.82
G2W53_000173	0	0.0548802	0.0496916	0.042272	0	0	0.0317147	0	0	0.250273	0.294407	0.0434734	0	0.0453237	0.0295151	0	0	0	0	0	0
G2W53_000174	0.563047	0.618556	0.622306	0.476449	0.72891	0.749081	1.31068	0.764242	1.07538	2.86625	3.3717	2.4894	0.968632	3.63349	1.0704	0.70901	0.575417	0.616641	0.664333	0.908893	0.938173
G2W53_000175	87.9865	63.3187	69.8597	15.4572	15.2529	21.3365	110.062	89.6823	84.3934	265.781	267.762	294.453	335.416	296.871	332.194	10.6524	15.769	10.4695	15.7221	13.3897	13.5535
G2W53_000176	53.2562	50.5837	65.1152	142.8	174.913	145.43	25.7804	32.1302	28.5208	14.6847	15.2591	9.92742	11.0876	10.2615	11.1756	33.7955	38.8986	33.7336	39.1957	45.3844	44.7359
G2W53_000177	15.0615	13.5765	13.0612	6.99726	6.67817	6.7842	0.432669	0.881513	1.24248	15.2236	15.4538	28.0285	15.2139	27.1188	14.5863	3.57077	5.07387	3.86486	5.27212	4.83868	4.80842
G2W53_000178	12.7109	14.2828	12.0087	63.7496	80.1088	95.0047	262.061	234.311	217.857	49.023	45.317	4.93651	1.28054	4.32316	0.536242	243.082	238.557	236.38	231.754	199.268	202.115
G2W53_000179	0.362928	0	0	2.86635	6.07178	2.89705	0	0	0	0	0	0	0	0	0	2.11717	12.4096	5.44035	18.0523	29.7942	28.7307
G2W53_000180	0.131255	0.38452	0.0435208	55.1636	118.304	72.232	0.0833289	0.0943183	0.102554	0	0	0.0956913	0	0.099764	0	25.2519	73.2867	25.1148	71.6686	146.667	146.74
G2W53_000181	95.7595	75.9391	108.712	13.4158	19.1352	21.1422	4.83132	7.2913	8.25831	170.791	164.6	119.741	70.0031	122.601	78.14	35.0041	43.5132	32.8399	37.7732	76.4739	77.8598
G2W53_000182	0	0	0	0	0	0	0	0	0	0	0	0	0	0	0	0	0	0	0.0255001	0	0
G2W53_000183	2.21493	2.8118	2.74181	2.91552	4.41139	3.88278	1.8749	1.48551	1.53831	0.501035	0.593754	0.417752	0.270914	0.435532	0.315135	1.28133	1.43055	1.50516	1.8209	0.881248	0.874651
G2W53_000184	12.2274	8.18422	14.7135	14.4809	19.7886	19.7718	0.376996	0.853428	0.92795	3.41906	3.28909	2.50865	1.87337	2.61542	1.85802	4.67169	5.88653	4.54502	5.41663	3.88573	4.21145
G2W53_000185	121.025	114.604	125.395	38.799	49.9073	50.778	2.25652	3.53318	3.93427	38.4243	35.3358	23.9783	17.1398	24.2001	17.4756	39.1732	46.099	38.2458	47.1029	41.3955	41.3433
G2W53_000186	0.151372	0.221727	0.301146	5.97756	6.24068	5.40189	1.08914	1.3778	1.9712	0.173331	0.181241	0	0.104135	0	0.16353	3.48284	2.35074	3.30865	2.37831	2.93139	2.66272
G2W53_000187	31.9946	33.876	31.7371	12.016	14.058	12.6798	6.0729	6.31876	5.70996	4.79683	4.805	5.54553	5.57608	6.16114	5.87565	3.25826	3.97065	3.1598	4.30518	3.90624	3.94764
G2W53_000188	1.59592	2.33768	0.926041	14.9676	23.9582	18.4533	2.61741	2.86703	2.4939	0.605785	0.380059	0.336727	0.873477	0.351059	1.02875	25.5621	31.9117	24.3404	30.1932	59.8723	58.6285
G2W53_000189	50.5883	52.1232	83.9451	0	0	0.107973	0.145985	0.275395	0.0598885	0.054227	0.0567018	0	0	0	0	0	0	0.0509075	0	0	0
G2W53_000190	19.8139	20.5625	19.976	18.3132	18.4353	18.0582	9.00498	8.30115	9.14026	4.02291	4.27328	4.0153	4.50295	3.90866	4.24726	5.80308	9.41798	5.82983	9.2354	10.7075	10.4672
G2W53_000191	0.478143	0.350188	0.47562	1300.26	835.358	1145.81	3901.49	4626.3	4864.14	0.365774	0.254978	1.18601	3.62592	0.883208	3.33588	873.393	754.939	867.272	764.496	711.019	706.212
G2W53_000192	2.08544	3.39413	3.07323	74.64	94.6305	75.2918	5.8843	10.7675	7.3626	0.184938	0.128919	0.556825	1.91663	0.535868	1.77388	17.5106	20.8243	17.4775	20.6435	24.4585	24.859
G2W53_000193	76.8408	73.055	82.0572	78.6578	95.8123	79.8694	56.723	60.8336	55.9982	32.233	32.4945	30.6723	41.7263	31.0718	42.1201	23.1864	20.62	23.4213	21.2518	21.509	22.3983
G2W53_000194	0.114536	0.0838852	0	7.30132	12.8658	7.368	0.14543	0.384087	0.119322	0	0	0.0663428	0	0	0	5.75577	5.00941	6.27463	5.4176	4.74754	4.80046
G2W53_000195	4.79836	6.2476	6.54082	16.091	26.1217	19.2765	1.01543	2.29869	0.41657	2.38632	1.87142	1.4508	1.20966	1.08039	1.2664	29.8324	23.1549	28.8431	22.2345	24.5173	24.6822
G2W53_000196	0	0	0	0	0	0.344986	0	0	0	0	0	1.08684	0.704818	1.13309	0	0	0.837395	0	0	0	0
G2W53_000197	8.43892	7.40851	7.5605	3.49956	3.90691	3.30649	0.70961	0.910285	0.815106	10.186	10.359	8.06074	10.2572	8.02838	9.57237	1.09237	1.57936	1.2725	1.4193	1.63838	1.85819
G2W53_000198	7.15018	6.95978	7.92311	6.66202	7.80026	7.3213	16.5956	11.5357	11.7981	5.89138	6.05367	3.25774	3.72931	2.65805	3.53881	5.43672	6.26423	5.18626	6.19147	7.98463	8.04968
G2W53_000199	279.881	311.614	322.558	45.2056	50.0637	56.1199	121.345	103.607	110.419	282.987	281.983	72.0099	39.9414	72.1273	39.731	37.481	38.4615	37.2971	38.1213	46.6842	44.9005
G2W53_000200	0	0	0	0	0	0	0	0	0	0	0	0	0	0	0	0	0	0	0	0	0
G2W53_000201	39.8727	43.4835	35.0472	183.854	172.07	145.959	11.8102	13.0456	12.4335	11.257	12.0555	6.77024	3.46334	7.32143	3.28319	57.3498	66.2904	56.9585	66.3556	57.4514	58.0026
G2W53_000202	19.6589	19.2224	19.9305	5.34187	6.21132	6.08951	8.75608	9.4835	9.82908	12.3809	13.0987	10.5057	12.5727	10.7411	11.922	6.17107	8.91568	6.30866	8.49204	9.48727	9.67814
G2W53_000203	0.330568	0.423684	0.301422	1.44525	2.54299	1.24176	0.157399	0.138566	0.215237	0.255107	0.31525	0.0322278	0.459797	0.0335994	0.350083	1.03791	1.96166	1.241	1.9093	3.45936	3.5708
G2W53_000204	89.1898	91.005	86.5856	1.31885	1.44631	2.04006	32.5826	24.104	30.7457	10.0817	10.225	9.52253	3.76241	9.43101	3.7987	0.908276	0.535436	0.896016	0.559536	0.550941	0.538758
G2W53_000205	34.3578	50.8614	33.5193	1.57694	1.2589	1.82193	2.45451	2.81818	3.58584	18.4392	18.8732	27.8111	14.5771	26.5188	14.4264	3.36827	2.19899	3.06803	2.25156	1.7798	1.75862
G2W53_000206	34.8941	40.0813	41.8132	170.567	166.178	148.956	74.2391	87.7046	89.8078	29.0574	29.2199	32.8188	28.5261	32.2451	25.8395	152.687	197.261	155.721	201.117	212.733	212.398
G2W53_000207	2.15164	2.57516	2.67971	70.1345	81.7771	71.0671	4.90871	10.2071	7.98207	1.0887	1.47431	1.5129	0.981122	1.42215	0.875596	32.6184	41.6011	32.4546	41.6778	48.717	50.492
G2W53_000208	3.03125	4.16261	4.20879	0.160315	0.282995	0.311355	0	0	0	0.147	0.153709	0.154968	0.18729	0.154219	0.200857	0	0	0.00475866	0	0.0051436	0.00530929
G2W53_000209	8.67543	9.94253	9.26888	0.317209	0.575951	0.301748	0.305984	0.230891	0.292895	212.981	210.818	33.2712	73.4246	34.1695	75.4526	2.34997	2.21916	2.48251	2.06733	1.59549	1.64689
G2W53_000210	4.30329	8.55458	4.48441	10.5302	11.1864	9.65704	0.189229	0.401596	0.494886	2.23781	2.1144	1.53613	4.22772	1.56245	3.84097	5.58992	7.53444	5.66968	7.64886	10.451	10.3075
G2W53_000211	37.5834	36.1855	29.684	0.555857	1.598	1.388	2.68093	1.34866	2.93286	57.8009	57.9224	67.2136	24.3212	67.6461	24.0834	0.569135	1.88652	0.564815	1.67337	1.43904	1.41788
G2W53_000212	8.28782	7.23721	8.87823	0.269736	0.19046	0.374191	0.20237	0.458117	0.33208	0.648822	0.678433	0.841516	0.85757	0.563998	1.02022	0.197533	0.0926255	0.162428	0.144367	0.131675	0.135917
G2W53_000213	43.8024	52.014	47.4724	28.3089	27.3577	26.891	5.6997	6.89278	7.79001	13.2402	13.3587	9.7759	11.6627	9.85544	11.1453	20.4275	23.6981	20.4981	24.9932	28.7896	28.1182
G2W53_000214	34.4263	49.9017	48.0376	26.7038	25.2836	25.9314	19.4275	15.805	18.6795	183.999	201.976	206.887	123.158	168.129	118.851	65.5483	114.444	78.1252	117.217	103.038	108.757
G2W53_000215	27.1274	32.1542	30.4828	19.3405	18.4758	19.6928	12.4535	12.9159	15.3267	15.3169	14.7772	8.64059	7.97877	8.38883	7.79086	5.55744	7.11533	5.50822	6.90981	8.27983	8.26754
G2W53_000216	26.2938	31.0361	27.4247	19.8736	20.5915	19.4186	9.07579	7.82682	7.57945	6.63439	6.12103	4.88084	7.20973	5.51262	8.00814	8.55458	14.4158	10.0751	13.3509	12.3751	12.5694
G2W53_000217	147.086	136.819	196.984	17.549	17.9004	17.7672	33.8708	28.7827	23.9851	556.921	553.194	317.264	415.038	321.653	413.155	67.7524	57.8145	64.964	58.6154	49.2952	49.5105
G2W53_000218	4.48641	5.63281	1.27507	0	0	0	0	0	0	0.68226	0	5.68854	4.30389	9.88442	2.57472	0	0	0	0	0	0
G2W53_000219	0.287571	1.05307	0.238377	0	0	0	0	0	0	0.0590176	0.0462833	0.0820128	0.385596	0.106879	0.389762	0	0	0	0.0164147	0	0
G2W53_000220	0.404583	0.350188	0.414643	0.0414978	0.0219762	0.0345407	0.0155669	0	0	1.05199	1.13056	2.1116	1.89607	2.1168	1.9023	0.0266898	0.281591	0.0274331	0.292593	0.207566	0.214252
G2W53_000221	7.30926	7.38098	7.63789	0.0833007	0	0.0693354	0	0.0176847	0.0192289	3.22976	3.18779	2.3909	1.00647	2.23027	1.05368	0	0.0646373	0	0.0671629	0.0306292	0.0632317
G2W53_000222	67.1693	69.9464	61.1747	25.3219	19.5874	19.3113	21.3653	25.413	25.9841	24.6425	24.0722	16.7729	17.1429	17.4674	17.0244	6.41137	9.61722	6.14977	9.79924	12.1322	12.1372
G2W53_000223	29.7799	28.2934	30.5783	17.9224	18.5725	19.5573	29.0998	25.9029	28.3792	56.4536	55.1641	41.2998	40.6872	42.2334	40.3149	36.236	35.5512	35.9103	36.3075	40.4746	40.9592
G2W53_000224	28.0692	27.828	25.651	30.5108	38.0422	32.3071	18.6893	21.3181	19.7918	12.1139	12.2321	6.9316	8.77628	6.3663	8.85179	12.3116	19.5191	11.7626	18.3659	18.5589	19.0946
G2W53_000225	9.58041	4.99258	9.34658	6.7038	6.16462	6.18548	0.272921	0.264783	0.479841	39.8526	39.8973	1.97396	16.3571	2.22947	17.6083	3.85615	2.02788	3.92651	2.10712	1.6416	1.61183
G2W53_000226	27.275	31.6888	37.2644	17.8585	20.6819	25.0999	12.0075	10.0752	10.1562	7.71387	7.67436	6.5739	6.02922	6.85368	6.45334	4.42334	5.58633	4.48795	5.4991	6.53554	6.4846
G2W53_000227	11.3487	9.23518	9.19826	2.68732	1.67428	1.90785	0	0	0	4.90631	4.21411	2.80024	4.18461	3.681	3.71963	1.28033	1.87613	1.56274	1.65702	2.57818	2.56947
G2W53_000228	62.6173	54.4792	55.7931	26.1588	17.3163	12.8661	15.8344	23.0134	27.0357	82.2876	80.4547	64.5469	61.1239	64.9028	63.3236	38.1887	52.5937	38.6621	50.8015	47.0531	48.5688
G2W53_000229	0.461656	0.338112	0.688829	0.520869	0.689597	0.867091	0.048848	0	0.120236	0.202808	0.212064	0.845486	0.487379	0.783529	0.51024	0.370468	0.868584	0.444251	0.601681	0.342991	0.283232
G2W53_000230	0.430329	0	0.285372	0	0	0	0	0	0	0.458089	0.478995	0	0.412822	0	0	0.418394	0.490474	0.430047	0.509638	1.3945	0
G2W53_000231	10.7195	10.3353	11.0678	18.2946	21.7279	16.693	5.68551	6.3053	7.42132	10.8891	11.4586	10.3128	7.00041	9.54591	8.24486	19.7643	12.3273	19.859	12.4231	11.4717	12.1319
G2W53_000232	24.9922	25.6984	25.0249	14.1922	24.8221	20.9058	20.1047	13.7964	16.8978	12.07	13.0936	12.7524	11.4477	14.2776	11.942	3.88115	10.358	3.86193	10.1089	13.7157	12.7844
G2W53_000233	43.2793	43.3011	40.085	9.97878	9.34675	11.4323	10.814	11.9519	12.4941	28.9752	29.3982	23.4941	22.963	23.5204	22.8736	9.84435	11.0799	9.48771	11.9314	13.91	14.4425
G2W53_000234	0	0	0	0	0.0884446	0	0	0.248194	0.115657	0	0	0	0.0529906	0	0.0554761	0	0	0	0	0.0298335	0.0307945
G2W53_000235	0	0	0	0	0	0	0	0	0	0	0	0	0	0	0	0	0	0	0	0	0
G2W53_000236	0.310547	0	0	0	0	0	0	0	0	0	0.0136596	0	0	0	0	0.0119314	0	0	0	0	0
G2W53_000237	9.10696	5.64372	7.27809	0.658657	0.279046	0.548233	0.296496	0.783061	0.364902	1.32057	1.06219	2.39976	1.09853	2.5019	0.766707	0.27834	0	0.190728	0	0	0
G2W53_000238	12.5068	7.93108	8.29384	0.559275	0.227829	0.393895	0.0645535	0.0365334	0.079447	38.9526	39.7494	20.2349	15.6219	20.8597	17.0089	0.0745072	0.196522	0.095728	0.181512	0.0827773	0.0854439
G2W53_000239	0	0	0	0.279726	0.444407	0.145519	0.0524663	0	0	0	0	0	0	0	0	0.218383	0.0568901	0.224465	0.059113	0.0539161	0.166959
G2W53_000240	3.96356	2.41906	2.75985	0.149064	0.197352	0.186111	0.139795	0.221524	0.137638	1.62346	1.5892	0.600004	1.05837	0.575497	1.10801	0.0630971	0.110951	0.0486408	0.0960719	0.175252	0.180897
G2W53_000241	113.96	94.8908	107.928	67.8162	73.6217	70.9983	125.253	102.29	100.402	43.9887	44.1153	39.8895	43.8372	40.8806	44.5787	21.5607	22.393	21.6082	22.6619	24.4488	24.5464
G2W53_000242	0	0.0700375	0	0	0	0	0	0	0.099624	0.0480273	0.200877	0.266961	0	0.0695808	0.090623	0	0.0514227	0	0	0	0
G2W53_000243	0	0	0	0	0.0590114	0	0.0418011	0	0	0	0.109933	0	0	0.152317	0.09919	0.576149	0.337704	0.690895	0.233932	0.106683	0.33036
G2W53_000244	1.58542	2.20007	1.41105	0.800241	0.698002	0.97953	0.52975	0.439716	0.434648	1.38269	1.10561	1.58236	1.53925	1.67916	1.57308	0.520007	0.870848	0.591758	0.814387	1.21735	1.40565
G2W53_000245	0	0	0	0	0.0205228	0	0	0	0	0	0	0	0.0217575	0.0174891	0	0	0.0258501	0.0113326	0.01343	0	0.0252879
G2W53_000246	0	0.220618	0	0	0	0	0.127493	0	0	0.197736	0.20676	0.274781	0	0.572951	0.0932774	0.0903008	0	0.278448	0.329982	0	0
G2W53_000247	0.0300929	0.0220398	0.0399121	0	0	0	0	0.0432488	0.172426	0.0260701	0.0136299	0	0.011747	0	0.0245959	0.0357165	0.0139566	0.0122371	0.0145019	0.013227	0.0136531
G2W53_000248	0	0	0	0	0	0	0	0	0	0	0	0.0225393	0	0.0469972	0.0306049	0	0	0	0	0	0
G2W53_000249	0	0	0.0531277	0	0	0	0	0	0.0417308	0.0554566	0	0.0256881	0	0.0267814	0.0523207	0.0168837	0.0395848	0.0173539	0	0	0.038724
G2W53_000250	0.0590648	0.0432585	0	0	0	0	0	0	0	0	0.0463757	0	0	0.0321278	0.0627655	0.0202542	0.427384	0.0416366	0.0493426	0	0
G2W53_000251	0	0	0	0	0	0	0	0	0	0	0	0	0	0	0	0	0	0	0	0	0
G2W53_000252	0.699579	0.602782	0.81869	0.208935	0.295057	0.444428	1.37595	0.689992	0.557323	1.53826	1.94456	0.829523	0.662091	0.831565	0.433217	0.125818	0.368734	0.193983	0.434227	0.419349	0.456906
G2W53_000253	0.857934	1.60577	0.885014	0.268882	0.341743	0.0447608	0.887611	0.593668	0.446889	1.32081	1.24955	0.305906	0.538463	0.318925	0.504381	0.143613	0.303039	0.177136	0.31488	0.127643	0.164694
G2W53_000254	0	0	0	0	0	0	0	0	0	0	0	0	0	0	0	0	0	0	0.0180206	0	0
G2W53_000255	2.55912	3.43618	3.07595	4.99273	5.22434	4.35598	0.60926	0.97056	1.11085	4.7099	5.14276	12.1923	10.2919	11.0204	10.1455	2.51254	4.64123	2.60208	5.00806	3.70075	4.01642
G2W53_000256	116.003	119.643	133.686	70.5877	88.6079	75.6862	32.1798	44.4021	40.5094	62.6145	62.2316	43.945	40.6959	44.8074	40.3671	26.2259	28.5433	25.9767	28.9901	34.1428	35.4746
G2W53_000257	43.3976	44.2483	41.9835	28.4182	32.4379	48.8262	173.088	122.946	105.226	84.9664	83.3506	66.211	82.611	67.1917	78.1108	106.395	84.1842	103.746	80.0161	71.6947	74.3838
G2W53_000258	19.9673	21.4735	17.9594	16.4755	19.5755	15.8687	2.42844	4.6728	4.54286	6.37753	6.18064	4.20304	4.45456	4.13153	4.53305	4.34104	5.34798	4.34837	4.9801	5.36655	5.41271
G2W53_000259	4.94721	7.00503	5.5408	4.7755	5.45209	6.50437	0.325713	0.316001	0.572656	1.27981	1.46566	1.52439	1.15334	1.32439	1.35118	3.78502	4.89387	3.63299	5.01728	4.8854	4.94703
G2W53_000260	3.67354	6.90553	3.41054	34.6775	38.9235	33.9236	0.777398	1.75984	1.46702	2.42585	2.41181	6.29996	4.90983	6.04956	5.25268	21.8658	22.6522	22.8481	22.387	23.4857	23.9507
G2W53_000261	5.33429	10.8011	14.7739	11.6829	24.5604	16.7965	22.8425	10.2217	16.3446	2.26054	1.57581	2.09422	2.26351	1.09167	0.710905	40.6049	38.1878	38.4347	35.7678	42.8181	38.1466
G2W53_000262	68.976	66.9583	68.7074	31.6596	35.0798	33.5142	8.3236	11.2596	9.79425	48.748	47.1087	36.0561	50.3788	34.8568	50.9244	19.3535	19.0678	19.1175	18.6319	18.1109	18.2413
G2W53_000263	0.219876	0.362329	0.14581	0.0620195	0.0985318	0	0.0930607	0	0.229063	0.28103	0.248647	0.240325	0.506518	0.250553	0.530277	0.118467	0.0462919	0.0405887	0.0721511	0.087744	0.113213
G2W53_000264	1035.68	1333.87	1073.19	184.579	213.14	178.852	107.698	72.1535	73.6022	864.041	866.149	1878	1817.55	1882.26	1799.36	79.6189	99.5081	80.0324	96.9825	95.3107	96.6732
G2W53_000265	271.302	255.49	253.76	78.6079	81.0512	84.2277	59.4694	61.9123	57.4991	497.957	506.19	734.526	593.984	731.919	599.009	153.24	126.922	153.041	121.064	91.3174	90.7921
G2W53_000266	0	0	0	0	0	0	0	0	0	0	0	0	0	3.5736	0	0	0	0	0	0	0
G2W53_000267	10.041	19.3121	9.20634	18.1262	24.2588	17.1373	0.517364	0.627421	0.591247	2.75816	2.66388	1.84327	4.28814	2.10474	4.48928	5.55752	12.5114	4.90191	12.6724	19.8264	19.8476
G2W53_000268	130.115	125.017	129.289	52.2781	53.4955	52.0593	32.316	32.2686	28.9844	138.528	140.48	198.203	173.558	202.195	172.547	11.101	18.7608	11.3022	18.8113	22.5655	22.2884
G2W53_000269	10.2148	11.8846	10.4966	16.8895	14.901	9.42001	5.15426	6.34833	8.24485	3.66681	3.57535	2.31846	2.42052	2.43041	2.36108	4.54635	8.8434	4.5611	8.87278	10.9671	10.7539
G2W53_000270	1.84914	3.05807	1.78004	11.8449	12.5098	11.3996	1.86822	3.48623	3.29351	1.13133	1.20173	0.998177	0.776786	1.04066	0.914874	6.05214	9.90196	6.00155	9.76942	10.2043	10.3261
G2W53_000271	71.9921	65.2142	81.5374	22.5509	27.7335	26.5986	9.94287	11.7079	13.0263	23.8473	23.2996	22.3426	18.5735	21.8865	16.8996	8.72221	9.53165	9.31969	10.5643	11.8803	11.7544
G2W53_000272	142.206	106.908	142.995	89.2151	107.841	82.627	27.1986	25.5544	27.0012	88.2004	86.683	69.6517	67.8107	71.9345	68.0322	17.2459	31.9712	17.4907	30.7777	33.7372	33.1814
G2W53_000273	5.8221	4.54214	4.70024	0.214202	0.378119	0.178291	0.0535686	0.0606332	0.131855	1.21548	1.28937	2.32552	2.6511	2.14377	2.64249	0.0321782	0.0943047	0.0330745	0.0783915	0.017875	0.0369016
G2W53_000274	1.82373	3.36224	1.70985	11.6364	11.4604	9.98082	0.0798496	0.150634	0.327574	0.321239	0.310061	0.206033	0.37857	0.214801	0.3497	5.39409	5.02695	5.31234	5.14089	6.77012	6.98822
G2W53_000275	0	0	0	16.4433	20.5127	16.4817	0	0	0.0267305	0	0	0	0	0	0	4.7949	4.26205	4.87429	4.23603	5.32712	5.22682
G2W53_000276	307.378	269.019	364.359	18.3806	14.8763	21.6496	16.6522	23.6339	20.9744	13.0303	12.3953	5.81789	6.10451	5.45214	5.19256	6.78841	9.31781	7.68406	7.64084	13.0313	12.7613
G2W53_000277	7.18531	5.97086	7.33065	0.467707	0.412809	0.519061	0.292416	0.0661958	0	3.40635	3.56181	1.88202	1.18352	1.66483	2.3619	5.24777	3.82294	3.66017	3.88099	6.37164	4.59953
G2W53_000278	30.7187	36.0842	37.977	6.72053	6.15202	6.31304	1.08045	1.54906	1.81729	4.6209	4.8549	6.14483	3.26766	5.92588	3.35835	1.71646	1.75177	1.82654	1.79562	1.74994	1.76
G2W53_000279	19.5103	19.2354	21.8954	8.88976	8.26265	7.65107	18.3754	13.455	12.7313	10.9755	11.1526	11.5226	11.5342	11.2653	11.004	4.36799	5.52573	4.42505	5.09092	6.63336	6.30649
G2W53_000280	16.3019	31.9248	20.6811	25.59	25.8331	27.124	0.524972	1.2733	1.19988	5.62422	5.47179	7.47579	6.03807	7.36884	6.13672	7.37028	8.27348	7.48373	8.27029	10.6697	10.9109
G2W53_000281	5.03184	5.87651	6.17769	14.5	15.3576	13.8251	2.01457	2.41054	2.26684	4.67152	4.73998	5.14527	5.61319	5.06345	5.81118	7.86971	8.52155	7.82902	8.89301	13.2026	13.4467
G2W53_000282	12.852	13.2173	14.0705	3.95814	3.5876	3.92812	1.87028	1.8099	2.42478	8.65867	8.49394	7.53157	4.28402	7.5683	4.30014	1.62223	2.54493	1.55707	2.5136	2.43839	2.50326
G2W53_000283	17.4044	17.1592	18.9402	4.90919	8.13265	6.81027	2.6443	2.13788	1.51096	43.779	43.3008	54.7887	33.2812	55.1732	32.3061	1.28608	1.57617	1.20173	1.42414	1.42883	1.5419
G2W53_000284	20.6739	22.0618	19.976	16.3852	14.5125	14.4124	5.28761	7.5951	7.20124	7.49575	7.7777	8.01872	4.90647	8.41554	4.82914	3.74703	6.65043	3.97738	6.73966	6.84746	6.82709
G2W53_000285	0	0	0	0	0.749937	0	0	0	0	0	0	0	0	0	0	0	0	0	0	0	0
G2W53_000286	38.0194	38.2333	35.3944	57.3044	61.8297	56.0741	23.2706	28.6279	28.8426	63.2688	63.5345	48.7801	55.2342	47.5869	55.5382	39.5929	45.4594	38.7603	44.1362	57.8963	57.4561
G2W53_000287	13.9082	14.211	15.072	10.7165	12.7692	14.3356	13.2088	12.6106	13.4291	3.90314	3.76522	4.20035	5.83872	4.28392	5.9638	3.12081	4.22129	3.14604	4.02071	3.82726	3.89549
G2W53_000288	0	0	0.230937	0.0982274	0.41615	0.490558	0	0	0	0	0	0	0	0.0971899	0	0.245084	0.359134	0.25191	0.298533	0.816863	0.843178
G2W53_000289	0	0	0	0	0	0	0	0	0	0	0	0	0	0	0	0	0	0	0	0	0
G2W53_000290	0	0	0	0	0	0	0	0	0	0	0	0	0	0	0	0	0	0	0	0	0
G2W53_000291	43.365	43.0625	42.3876	19.9396	18.2803	14.2868	10.9097	14.6567	17.323	34.2933	34.3816	27.7275	29.5828	26.809	29.8942	9.09551	13.4929	9.19586	13.4359	15.8374	15.8925
G2W53_000292	1.16417	0.639473	0.675518	6.81376	9.39051	7.65302	0.554318	0.418281	0.379004	0.0370708	0.0387626	0	0.200445	0	0.174873	3.4197	4.247	3.72376	4.083	4.70208	4.46527
G2W53_000293	9.54311	8.63024	9.35516	2.62156	3.56995	3.31205	4.63612	3.81638	3.9335	8.71703	8.84358	5.4078	4.81625	6.31451	4.74844	1.61129	1.6111	1.70488	1.61633	1.63218	1.57607
G2W53_000294	24.3972	29.902	18.4902	0.280882	0.148748	0.233792	0	0	0	10.0002	10.5849	5.62687	6.74521	6.04412	6.77219	0	0	0	0	0	0
G2W53_000295	0	0	0	0	0	0	0	0	0	0	0	0	0	0	0	0	0	0	0	0	0
G2W53_000296	0	0.125708	0	6.00335	7.74293	5.96403	1.16233	0.822262	1.60931	0	0	0	0	0	0	29.1915	33.5446	29.1155	32.8359	22.582	22.8135
G2W53_000297	0	0	0	0	0	0	0	0	0	0	0	0	0	0	0	0	0	0	0	0	0
G2W53_000298	6.3625	5.92352	7.10365	8.29389	9.79392	12.0514	3.1493	3.44408	4.08185	3.35641	3.13714	3.33155	3.35807	3.05654	3.27001	5.23022	7.39274	5.18298	7.77304	8.45201	8.48035
G2W53_000299	27.3689	19.6665	18.7204	0	0	0	0	0	0	65.7816	68.2089	46.8519	44.7499	45.1294	43.5643	0	0	0	0	0	0
G2W53_000300	10.2824	6.78825	6.43459	1.47058	2.24981	1.29204	0.0612948	0.0693783	0	9.86653	11.6064	5.14157	4.02898	7.14719	3.19983	3.52014	4.12659	3.32873	5.3169	3.28513	3.22948
G2W53_000301	25.2579	27.9707	25.0036	17.1534	16.2543	15.3628	13.6244	14.7414	17.3169	25.2963	25.6515	21.1168	17.1384	21.3564	17.3242	11.4524	15.1596	11.6859	15.2053	17.3403	17.4033
G2W53_000302	0.649587	1.31531	0.574364	0.596384	0.761035	0.592092	0.0377358	0.0305089	0.0132692	0.0531215	0.0509171	0.0861226	0.0598403	0.0705477	0.0501177	0.234505	0.146932	0.228569	0.162523	0.202139	0.199377
G2W53_000303	71.344	107.551	83.9782	0.223597	0.236822	0.186111	0	0	0	0	0.0575123	0.152865	0.991339	0.0796857	0.934054	0.0502359	0	0.0516351	0	0.111624	0
G2W53_000304	40.3456	44.9521	43.036	24.651	20.8772	16.4854	14.4161	17.3008	19.0515	43.8206	43.5063	29.9005	26.5485	29.5699	27.0513	17.8106	22.722	17.6834	22.9259	22.4325	21.9446
G2W53_000305	3.65367	4.27376	3.85227	3.58847	4.52318	4.08534	5.34003	4.82282	5.98331	1.54977	1.54766	1.19779	1.29462	1.31184	1.34713	1.43138	2.12543	1.40585	2.08256	2.73877	2.81788
G2W53_000306	0.229509	0.16809	0.152198	1.39184	2.33123	1.37403	1.77276	1.64922	1.67368	0.208583	0.218103	0.115942	0.0751887	0.120876	0.0787154	2.2099	2.18863	1.87982	2.0885	2.11655	1.92256
G2W53_000307	2.61156	4.05621	3.10539	10.2112	10.6	10.9096	1.2959	1.89821	2.50959	0.247297	0.212951	0.303223	0.157313	0.463654	0.150967	2.77685	2.81913	2.8815	2.75126	4.33976	4.44909
G2W53_000308	0	0	0	0	0	0	0	0	0	0	0	0	0	0	0	0	0	0	0	0	0
G2W53_000309	22.7435	23.568	29.0415	41.2208	47.6345	44.8759	14.439	20.3421	18.1484	15.406	14.4889	9.47393	8.81687	8.91508	8.64569	24.5433	25.738	24.3126	26.3004	33.0176	31.8555
G2W53_000310	3.52957	3.07528	3.83378	2.09413	2.50888	2.22882	0.463612	0.233223	0.44378	3.22082	3.27872	0.544669	1.0443	0.518472	0.948587	0.280164	0.766339	0.287968	0.739405	0.933785	1.03526
G2W53_000311	100.327	104.813	100.045	42.0721	34.5945	39.0433	107.308	76.5832	89.217	55.9779	54.5578	46.2042	41.9746	45.7941	42.0536	32.7882	62.8063	33.1388	61.9964	65.0608	65.4881
G2W53_000312	10.4776	10.3595	8.33782	12.117	11.4251	15.7433	3.76936	8.15648	4.36613	0.887782	0.858238	0.837978	1.2982	0.825107	1.28007	0.550767	1.29131	0.581832	1.32313	1.8697	1.80711
G2W53_000313	0.45641	0.835675	0.151334	4.24834	11.7263	5.35773	0	0	0	0	0.0489484	0.0650515	0.168745	0.406921	0.0441649	1.02613	0.852065	1.05471	1.09368	1.28253	1.66707
G2W53_000314	4.72518	9.94945	8.06875	7.99687	5.36425	7.04447	14.3492	12.45	12.5526	2.61325	3.67942	2.08539	2.98457	2.96134	2.9781	1.39427	3.46287	3.71635	2.59068	5.2772	4.49869
G2W53_000315	10.203	6.40504	6.12169	10.6894	6.96715	7.75661	6.16903	8.37911	9.87001	5.59701	5.12089	2.91667	5.67442	1.0136	9.24091	4.47301	7.86542	4.59759	7.39439	11.3589	11.3584
G2W53_000316	1.14102	3.3427	0.605334	6.95182	14.4533	12.0013	0.482929	0.546617	0.237739	0.422092	0.481479	0.53323	0.657024	0.389147	0.687842	3.04908	2.7116	3.31412	2.56141	2.95921	4.09952
G2W53_000317	0	0	0	0	0	0	0	0	0	0	0	0	0	0	0	0.610157	0.715275	0.627152	0	0	0
G2W53_000318	10.7256	15.7107	3.78334	2.38164	2.38616	0.857237	1.06244	1.03857	0.178304	0.369702	0.374618	0.344265	0.381255	0.309221	0.377563	0.100952	0.236687	0.0858731	0.216253	0.0618797	0.0518969
G2W53_000319	0	0	0	0	0	0	0	0	0	0	0	0	0	0	0	0.0318805	0	0	0	0	0
G2W53_000320	0	0	0	0	0	0.0670351	0	0	0	1.87574	1.40096	1.36536	0.804945	1.55287	0.505621	1.06055	0.860721	0.670825	0.496862	0	0
G2W53_000321	0.118595	0.34743	0	0.133806	0.354301	0.0556867	0	0	0	3.19001	1.14661	2.63206	1.88657	2.45523	1.31671	1.82099	2.34818	1.68454	1.55268	0.101156	0.104414
G2W53_000322	0	0	0	0	0	0	0	0	0	0	0	0	0	0	0	0	0	0	0	0	0
G2W53_000323	15.5973	16.699	15.7124	25.7923	31.1594	26.416	12.9761	14.5163	14.8535	13.1301	12.4	9.57123	12.5508	9.78616	11.9938	10.8312	14.6272	10.7054	14.7765	15.7108	15.5412
G2W53_000324	6.46873	6.68219	8.22731	4.65683	4.32656	5.78017	3.22819	3.35329	3.6461	2.08463	2.15695	1.63802	1.30816	1.70774	1.25625	1.18626	1.76457	1.15782	1.95494	2.45865	2.36638
G2W53_000325	0	0	0	0	0	0	0	0	0	0	0	0	0	0	0	0	0	0	0	0	0
G2W53_000326	1.4989	0.920718	0.641285	0.32732	0.31779	0.431371	0.245573	0.440101	0.30223	0.422271	0.496736	0.256726	0.23784	0.229416	0.199196	0.024105	0.339093	0.0247764	0.322981	0.0803417	0.0829298
G2W53_000327	30.1832	27.1699	29.2663	0	0	0	0	0	0.0313189	5.32411	5.46541	3.27699	2.95767	2.9938	2.88997	0	0.0260297	0.0228228	0.0270468	0	0
G2W53_000328	27.7768	23.7248	21.1304	0	0	0	0	0	0	7.65217	7.54417	3.49393	3.49726	3.32588	3.40346	0	0.117045	0	0.0608091	0	0
G2W53_000329	74.2376	55.2148	56.9808	51.4443	51.8317	51.0126	154.664	121.517	128.87	15.3459	15.004	5.39108	3.82572	5.31924	3.86309	3.68087	3.61631	3.71607	3.43849	3.05616	2.95181
G2W53_000330	0	0	0	0	0	0	0.0692898	0	0.085276	0	0	0	0	0	0	0	0.0314311	0.0275587	0.0326592	0	0
G2W53_000331	0	0	0	3.73339	4.49962	4.7148	0.965858	0.32797	0.594348	0	0	0	0	0.0895696	0	0.734071	0.794341	0.696477	0.89416	0.250939	0.0647556
G2W53_000332	0	0	0	0	0	0	0	0	0	0	0	0	0	0	0	0	0	0	0	0	0
G2W53_000333	0	0	0	0	0	0.35361	0	0	0	0	0	0	0	0	0	0.166092	0	0.170718	0	0.184528	0.190472
G2W53_000334	0	0	0	2.33496	6.73226	5.18269	0.389292	1.65237	1.19777	0	0.0594497	0	0	0	0	2.95991	2.06973	2.88223	2.27711	2.88461	3.09664
G2W53_000335	0	0	0	0	0.137393	0	0	0	0	0	0	0	0	0	0	0	0	0	0	0	0
G2W53_000336	0	0	0	0	0	0	0	0	0	0	0	0	0	0	0	0	0	0	0	0	0
G2W53_000337	0	0	0	0	0	0	0	0	0	0	0	0	0	0	0	0	0	0	0	0	0
G2W53_000338	0	0	0	0	0	0	0	0	0	0	0	0.021199	0	0	0	0.00696659	0	0	0	0	0
G2W53_000339	0	0	0	0	0.107775	0	0	0	0	0	0	0	0	0	0	0	0	0	0	0	0
G2W53_000340	0.391208	0.573034	0.415086	0.706217	0.794738	0.844991	0.0331151	0.299859	0.0407553	0.00467109	0.0073264	0.00649109	0.00210475	0	0	0.0191984	0.0350092	0.0109629	0.0129918	0.0260693	0.0195702
G2W53_000341	0	0	0	0	0	0	0	0	0	0	0	0	0	0	0	0	0	0	0	0	0
G2W53_000342	0	0	0	0	0	0	0	0	0	0	0	0	0	0	0	0	0	0	0	0	0
G2W53_000343	0	0	0	0	0	0	0	0	0	0	0	0	0	0	0	0	0	0	0	0	0
G2W53_000344	1.12833	1.3773	1.4058	2.83544	2.83971	2.77751	0.231543	0.360358	0.480875	1.02542	0.997412	1.2924	0.558752	1.41651	0.539964	1.786	5.10657	1.70142	5.51835	4.76703	4.82068
G2W53_000345	0.507691	0.669291	0.381565	5.59444	4.42884	5.72134	0.759229	0.924213	0.775724	0.0598623	0.125189	0.0665492	0.237366	0.086727	0.237204	1.51996	4.05076	1.5061	4.12912	4.64082	4.57714
G2W53_000346	0.0323904	0.0711672	0.0214796	0.164452	0	0.0456271	0.0274179	0	0	0	0.0105694	0	0	0	0	0.0553931	0.0865816	0.0569359	0.10121	0	0.0423494
G2W53_000347	0	0	0	0	0	0	0	0	0	0	0	0	0	0	0	0	0	0	0	0	0
G2W53_000348	1.99653	1.38528	1.44013	0	0.0209285	0.049341	0.0592992	0	0.0364902	1.18087	1.20536	0.46885	0.367395	0.529538	0.371365	0.0385194	0.0602073	0.0395922	0.0469198	0	0
G2W53_000349	0	0.0548802	0.0496916	0.380448	0.805902	0.387036	0.0317147	0	0.0390318	0	0	0	0	0	0	1.08091	1.26713	1.05811	1.37934	1.42963	1.53471
G2W53_000350	4.0055	6.85503	4.14699	5.11875	5.07962	4.22221	1.48771	1.1944	1.66063	2.07302	2.03682	4.07276	2.57678	4.06486	2.64706	2.46466	7.46235	2.56686	7.31653	8.52297	8.61034
G2W53_000351	17.9633	17.9733	15.6143	5.48776	4.59044	4.41202	3.74292	4.02471	4.63526	2.1687	2.19393	2.27865	2.73298	2.55444	2.72809	1.20779	2.41641	1.17522	2.3539	2.34377	2.43774
G2W53_000352	12.8393	15.3107	12.4077	10.7098	10.4909	13.5003	5.36447	5.17823	5.48749	3.68747	3.78436	2.8468	2.46155	2.72063	2.60922	3.43031	3.82022	3.36558	3.95049	3.72445	3.88019
G2W53_000353	112.838	125.138	135.657	124.595	147.455	129.676	162.815	151.759	143.982	24.7336	25.2942	26.2206	24.7042	25.7349	25.8276	39.1052	45.762	37.8548	43.9645	54.5116	54.2854
G2W53_000354	5.77702	8.76428	5.19924	4.8885	5.17764	3.48766	2.09578	1.18608	1.28965	3.46038	2.17098	1.92346	0	2.00533	0.652942	3.79263	5.18703	3.57341	3.46481	5.61814	5.43668
G2W53_000355	0	0.212133	0	0	0	0	0	0	0	0	0	0.327649	0	0.341594	0	0.21535	0.5049	0.221348	0	0.239253	0.24696
G2W53_000356	0	0	0	0	0	0	0	0.240512	0	0	0	0	0	0	0	0	0	1.00344	0	0	0
G2W53_000357	129.499	134.318	163.921	78.0528	93.9626	93.5334	65.8715	69.3947	50.5336	229.494	225.339	153.121	139.671	149.163	135.99	150.171	130.264	146.532	129.233	149.613	148.176
G2W53_000358	1.43443	1.83849	0.951239	0.606905	0.642803	0.505158	0.607111	0.515382	0.560385	1.52696	1.99581	1.06096	0	0.553057	0	0.697323	0.817457	0.358372	0.849397	1.93681	3.19872
G2W53_000359	11.1223	12.0491	11.6783	17.7777	19.6599	15.5589	7.45345	7.21535	10.2594	5.65378	5.02945	7.1531	5.32323	7.70204	4.06027	10.0965	12.378	9.90239	12.9555	15.6698	15.2907
G2W53_000360	25.534	30.1626	28.8716	19.4273	18.5844	16.244	12.1351	12.9839	15.6908	8.2811	8.27363	6.01407	5.98951	6.15806	5.87224	4.05595	5.7222	4.09637	5.58864	7.08799	7.22915
G2W53_000361	43.2022	44.8913	48.7766	20.0012	17.3994	18.9377	13.8487	11.5489	14.7887	24.7006	24.5502	19.1857	16.5893	19.357	16.6995	6.10157	13.0339	5.97134	12.4887	14.4383	14.2695
G2W53_000362	17.8055	19.2929	15.6897	6.6735	6.41241	6.1846	3.25185	2.74592	4.57383	28.5279	29.3674	25.9679	18.335	25.4711	19.195	6.36247	11.3655	6.74729	11.6865	8.3029	7.06476
G2W53_000363	46.6907	50.3745	47.1656	23.8536	26.1978	23.574	15.1339	16.5953	19.2357	26.3975	26.302	20.8017	19.1998	20.8978	19.3071	7.90688	10.0933	7.4378	10.1846	10.3588	10.4568
G2W53_000364	4.91805	4.95265	4.07674	5.54885	3.67316	4.90725	4.16304	3.53405	2.88198	2.24763	3.76034	3.12338	3.64595	1.30253	2.12053	5.33745	6.25698	4.64209	4.0009	3.19302	5.17924
G2W53_000365	3.81031	6.26577	3.86171	4.29903	3.78011	3.47703	2.52552	2.72082	2.50903	4.97447	4.32124	4.25396	3.51736	5.10027	3.97115	6.43068	6.96497	6.89717	7.57768	5.97961	5.69128
G2W53_000366	0	0	0	0	0	0	0	0	0	0	0	0	0	0	0	0	0	0	0	0	0
G2W53_000367	18.2038	13.0942	20.6227	16.9933	13.9844	24.7782	41.9168	33.7927	37.4208	1073.43	1076.11	374.023	174.088	374.378	170.534	4.3301	3.91951	4.67606	3.33824	6.94206	7.1657
G2W53_000368	0.020464	0	0	0.115444	0.0611361	0.0384359	0.0173224	0.00980346	0.042638	0.0467097	0.0488415	0.0324547	0	0.033836	0	0.0213311	0.112527	0.0219252	0.129915	0	0
G2W53_000369	5.82886	6.14864	5.43752	2.51526	1.63741	1.68507	0	0.0312578	0.0113291	0.00651179	0.00680897	0.045245	0.0176049	0.0188682	0.0184307	0.350903	0.439246	0.330111	0.456408	0.488968	0.518361
G2W53_000370	0.219876	2.25449	0.437431	11.5356	10.1159	5.78166	0.0930607	0	0	0	0	0	0	0	0	7.4497	5.39399	7.20677	5.87164	6.69431	7.28686
G2W53_000371	0	0	0	0	0	0	0	0	0	0	0	0	0	0	0	0	0	0	0	0	0
G2W53_000372	10.8186	12.106	11.8949	36.8	52.4335	44.0573	8.17046	9.03604	9.3223	3.33827	3.56437	3.23421	3.32618	3.09939	3.01642	44.1461	75.7394	43.0141	75.8741	93.4167	93.5697
G2W53_000373	7.08777	6.38062	5.28777	5.33125	5.99949	4.36813	3.7498	2.90029	2.99971	6.39584	5.86883	9.79479	6.35197	9.64435	6.77305	4.41102	2.93486	3.67611	3.19475	3.70858	4.10148
G2W53_000374	15.7339	15.1675	14.0902	2.27589	2.41051	2.46264	0.796833	0.837496	0.560385	6.65225	6.95584	5.75685	5.49232	5.36705	5.90027	1.49166	0.639749	1.49582	0.576113	0.646726	0.584115
G2W53_000375	0	0	0	0	0	0	0	0	0	0	0	0	0	0	0	0	0	0	0	0	0
G2W53_000376	1.63458	2.39431	2.01309	9.87985	14.5104	11.7322	0.197664	0.223732	0	3.20662	4.07146	1.90973	2.06411	1.65917	2.59311	19.2461	15.6952	18.492	16.8181	27.6576	28.5486
G2W53_000377	43.1693	40.4726	44.1723	30.6359	38.3418	38.9469	43.1861	38.7698	39.1717	46.768	49.2593	38.9942	42.1465	40.6538	43.2216	33.7981	33.6997	33.9703	33.953	31.7301	33.0383
G2W53_000378	2.65401	2.62409	3.168	1.94637	3.72656	3.86323	3.03288	3.36928	2.48841	0.0639406	0.133717	0.044427	0.0288111	0.0926356	0.0301625	0	0	0.0600265	0	0	0.0669723
G2W53_000379	0.303252	0.148066	0.201101	0.114049	0.24159	0.42718	0.0855659	0.145275	0.157961	0.0175066	0.0366111	0	0.0315533	0	0.0165166	0.0639583	0.0187442	0.0657396	0	0.0355287	0.0183366
G2W53_000380	15.5474	13.0473	16.5393	3.10631	4.8383	5.01899	5.07231	3.10337	3.37436	8.96475	10.4555	6.22885	5.59307	4.99535	6.18071	3.46412	5.53761	6.15013	4.21959	7.69725	3.25031
G2W53_000381	0	0	0	0	0	0	0	0	0	0	0	0	0	0	0	0	0	0	0	0	0
G2W53_000382	9.09966	10.3415	9.98801	17.7014	16.6861	25.9314	3.98416	5.86247	3.5958	4.32354	3.59613	5.18884	5.93299	5.55203	5.28423	17.411	18.622	16.789	19.131	12.4636	11.1155
G2W53_000383	30.216	24.8536	26.8813	16.0493	16.4431	17.5932	5.23352	6.05733	5.03655	2.85268	2.69879	1.8877	1.55063	2.00084	1.47384	4.96282	8.16918	4.99478	8.6395	8.91379	8.86895
G2W53_000384	20.1303	21.8497	20.8724	39.0248	53.6493	41.6399	6.70157	8.53353	8.80092	13.0584	12.8196	6.61668	9.53259	5.86561	9.60312	25.5203	31.5959	25.4548	32.0374	37.6689	37.5684
G2W53_000385	3.28615	4.33214	4.21313	1.54485	1.96347	2.1088	0.370889	0.367327	0.285287	1.22975	1.33439	0.67711	0.606388	0.739543	0.525377	0.508612	1.51543	0.522778	1.13581	1.24785	1.21514
G2W53_000386	0	0	0	0	0	0	0	0	0	0	0	0	0	0	0	0	0	0	0	0	0
G2W53_000387	32.1636	22.8447	25.26	45.8272	53.8213	49.1632	10.4462	14.2212	12.9322	11.6037	11.7953	6.59656	5.32054	6.45826	5.39352	26.3402	28.4369	26.355	28.6584	36.1697	36.6221
G2W53_000388	0	0	0	0	0	0	0	0	0	0	0	0	0	0	0	0	0.715275	0	0.743223	0	0
G2W53_000389	47.1441	46.4593	43.6976	57.1141	58.5869	57.9488	4.01669	7.19694	7.82538	18.3536	18.3028	11.8584	16.2774	12.3279	16.5828	13.5591	16.9608	13.0251	16.7187	21.0134	20.9402
G2W53_000390	11.9725	14.7547	10.9423	14.2008	13.1836	12.5408	3.02086	3.06997	3.07819	1.57652	1.53165	1.38002	0.984444	1.3848	0.966205	2.47165	3.8943	2.4123	3.79787	4.34573	4.3232
G2W53_000391	0.327424	0.102772	0.186112	27.8121	46.0582	32.6595	0.593912	0.313711	0.511656	0.056204	0.0705228	0.0312411	0.02026	0.0325708	0.0212103	21.0673	21.9768	20.5461	21.5724	21.2271	21.1692
G2W53_000392	15.549	15.4094	16.1646	15.4011	15.0856	11.3734	15.8335	18.1183	21.518	3.70249	3.85418	3.76695	4.0963	3.90333	4.17928	6.08396	8.40632	6.11376	8.55089	10.7343	10.6646
G2W53_000393	0.194971	0.28559	0.387884	0.274973	0.349485	0.320424	0.16504	0	0.101558	0.13939	0.124929	0.110686	0.14356	0.173095	0.131507	0.0363745	0.149244	0.0373876	0.199382	0.121236	0.104285
G2W53_000394	49.5126	47.4202	58.3208	28.3222	35.1694	35.2797	57.8848	50.9221	40.76	31.7356	31.5709	32.1569	27.3087	27.7783	28.7975	32.005	34.0972	29.3791	35.4295	36.1165	36.2412
G2W53_000395	25.7679	32.694	24.0675	50.98	64.4042	49.5907	16.2823	22.7762	17.9593	12.0098	12.3068	10.6811	9.30782	10.2657	9.51779	18.8669	18.9025	19.0541	20.71	23.5203	23.02
G2W53_000396	13.0027	12.9514	12.0718	4.89017	5.3607	5.25073	0.476953	0.913598	1.17399	9.01384	8.97912	7.95031	8.70475	8.30453	8.82407	1.05907	1.58119	1.12964	1.53344	1.97584	2.01657
G2W53_000397	0	0	0	0	0	0	0	0	0	0.223891	0.234109	0	0	0	0	0	0	0	0	0	0
G2W53_000398	0	0	0	0	0	0	0.011223	0.0127031	0	0	0	0	0	0.00906061	0	0	0	0.00587114	0	0	0
G2W53_000399	0	0	0	33.8402	47.0133	36.5804	0.329724	0.124403	0.135265	0	0	0.0377576	0	0	0.0128172	5.94354	11.3022	5.8285	11.3659	6.4654	6.8302
G2W53_000400	0	0	0	0	0	0.0631447	0	0	0	0	0	0	0	0	0	0.0358039	0.0839442	0.0368011	0.0872242	0.039778	0.0410594
G2W53_000401	82.604	76.2849	78.7499	48.8653	57.3551	50.1027	70.9429	47.9099	57.2539	22.9946	23.252	12.5937	14.7738	13.6	15.2881	12.9966	17.4949	12.5205	17.1852	17.4862	17.3411
G2W53_000402	26.9261	25.1501	24.3806	11.0076	11.1976	10.948	2.54287	3.61758	4.30671	10.634	10.8054	9.38477	9.88261	9.28721	10.1237	3.87716	6.56516	3.9147	6.53546	6.86374	6.91643
G2W53_000403	0	0.432585	0	0	0	0	0.249987	0	0.615325	0	0	0	0.333433	1.07208	0	0	0	0	0	1.87721	1.93769
G2W53_000404	0	0	0	0	0	0	0	0	0	0	0	0	0	0	0	0	0	0	0	0	0
G2W53_000405	0.922133	1.35072	0.815348	0.867007	1.46926	0.721654	0.910666	0.589008	0.64044	0.431384	0.451072	0.599465	0	1.24996	0	0.197001	1.1547	0	0.959857	0.656604	1.58143
G2W53_000406	2.82546	2.46986	2.35723	2.57085	1.74267	2.20405	0.675077	0.960591	0.854566	3.41087	3.54517	3.3775	3.92049	3.13657	4.04657	1.51101	2.07749	1.61062	2.18138	2.71499	2.48156
G2W53_000407	0	0	0	0	0	0	0	0	0	0	0	0	0	0	0	0	0	0	0	0	0
G2W53_000408	0.0282845	0	0.0187568	0	0	0.0132811	0	0	0	0	0	0.0205884	0	0.0214647	0.013978	0	0	0	0	0	0
G2W53_000409	0	0	0.22961	1.36728	0.827516	0.812897	0.146544	0.33174	0.360708	0	0	0	0	0	0	0	0.0523106	0	0.0543545	0.099152	0.307038
G2W53_000410	0	0	0	0	0	0	0	0	0	0	0	0	0	0	0	0	0	0	0	0	0
G2W53_000411	0	0	0	0.0441386	0.0467493	0	0	0	0	0.0732663	0.07661	0.30544	0	0.318439	0	0	0.078446	0	0.0815111	0	0
G2W53_000412	4.3579	5.0395	1.41962	204.179	200.13	160.076	0.323587	0.915653	0.995608	2.94554	2.93997	6.13983	7.54111	5.81922	7.76851	209.537	206.501	208.146	208.313	253.107	250.602
G2W53_000413	0	0	0	0.045681	0	0	0	0	0	0.0208042	0.0217537	0	0	0	0	0	0	0	0.0462907	0	0
G2W53_000414	192.281	170.721	117.429	0	0.33642	0.396572	0	0	0	3.11541	3.0815	4.24476	6.09145	4.31021	6.24919	0.0170897	0.0150255	0.0175657	0.00520418	0.00949333	0.00489957
G2W53_000415	0.238441	0.0582106	0.158122	0	0	0.0373204	0	0	0	0.224965	0.253327	0.288572	1.21641	0.275782	1.15918	0.0158055	0	0.0162457	0	0	0
G2W53_000416	2.25923	1.65464	0.998801	0	0	0	0	0	0	1.20248	1.25736	0	4.69585	0	3.0253	0	0	0	0	0	0
G2W53_000417	5.73772	8.4045	4.7562	0	0	0	0	0	0	4.58089	7.98325	0	20.6411	0	38.8967	0	0	0	0	0	0
G2W53_000418	20.472	20.7767	21.3336	16.2784	17.2413	17.3029	17.4942	19.381	18.3821	11.9113	11.8705	6.98985	7.08273	6.9837	7.54676	7.49736	9.0508	7.24709	9.36558	11.0942	11.3419
G2W53_000419	0	0	0	0	0	0	0	0	0	0	0	0	0	0	0	0	0	0	0	0	0
G2W53_000420	13.5474	14.5328	13.423	8.63154	9.33254	8.68123	8.63446	9.84952	9.9624	4.60445	4.37689	2.80264	1.93755	2.67384	2.27974	2.95424	3.44283	2.89363	3.281	4.30542	4.54375
G2W53_000421	44.0435	34.4298	39.1954	43.8995	49.3595	47.3624	34.964	35.2021	37.5628	6.47423	6.47537	6.7476	4.9149	6.98381	4.78028	6.10604	6.63055	6.17701	6.45902	6.92661	7.59199
G2W53_000422	2.23747	2.12425	1.97837	2.01022	2.20339	2.06232	3.1391	2.97745	2.61153	0.387215	0.34584	0.325094	0.0436189	0.350617	0.0837189	0.795737	1.68427	0.878486	1.82188	1.30972	1.35191
G2W53_000423	0	0.171022	0.309706	0.263463	0.139523	0.109647	0	0	0	0	0	0.224674	0	0.234236	0	0.147668	0	0	0	0	0
G2W53_000424	42.1977	45.3338	49.7293	42.6626	54.9827	52.579	4.84151	8.2809	5.03164	12.0691	11.6513	7.23111	7.2919	6.78892	7.17126	10.0031	12.4265	9.97475	12.2452	14.7625	15.6947
G2W53_000425	24.7523	34.8885	34.3773	0.790388	1.39523	2.08329	1.38365	0.559329	1.33797	0.364003	0.334941	0.121399	0.314912	0.14766	0.343419	0.132984	0.124716	0.10935	0.129589	0.147745	0.167755
G2W53_000426	0.496533	0.363656	0.439034	3.54806	4.00516	2.40921	0.385282	0.436092	0.603492	0.683068	0.892802	0.316404	0.256487	0.32987	0.322221	4.47112	3.04733	3.79408	3.29305	3.46563	3.39841
G2W53_000427	0	0	0	0	0	0	0	0	0	0	0	0	0	0	0	0	0	0	0	0.17977	0
G2W53_000428	0.885971	1.57584	0.839329	2.35622	1.8906	1.9612	0.160706	0.363799	0.461494	2.82937	2.9585	1.3106	1.82127	1.75677	1.9067	1.10751	3.75069	1.39133	3.89723	12.1677	12.7008
G2W53_000429	1.26686	0.721648	0.933459	0.0794081	0.16821	0.0660954	0	0	0	7.2149	7.54417	1.48534	2.76935	1.16142	2.77319	0	0.143055	0	0	1.89807	1.95922
G2W53_000430	0.0941345	0.241301	0.187275	0.185865	0.140613	0.287308	0	0	0.0245169	0.100073	0.0448457	0.119198	0.128834	0.103559	0.134877	0.0391719	0.0306136	0.040263	0.0159049	0.0870398	0.104818
G2W53_000431	1.43443	0.525281	2.85372	0.404603	1.71414	0	0	0	0	1.45023	1.01094	0.671763	2.61385	0	4.56075	0.441521	0	0	0	0.490528	0
G2W53_000432	24.3853	18.6236	21.0137	2.42762	1.94789	3.24526	0	0	0.339627	31.6121	30.279	54.948	48.5403	54.5032	47.917	0.733784	0.748	0.852598	0.777226	0.779787	0.43904
G2W53_000433	0	0.186176	0	0	0	0	0	0	0	0	0	0	0	0	0	0	0	0	0	0	0
G2W53_000434	0.0727609	0.177631	0.0160838	0.054729	0.0724576	0.0455537	0	0	0	0.0423658	0	0	0	0	0	0.0128982	0.0453609	0.0265149	0.0157111	0.0143299	0.0147915
G2W53_000435	88.3692	83.2582	92.7103	47.4544	47.6848	50.151	23.938	24.9693	26.8892	62.4302	59.792	35.2574	37.762	34.9742	39.419	17.7348	22.3677	17.1865	22.4333	25.1923	24.9891
G2W53_000436	3.57897	5.02398	5.93347	9.9268	12.1178	7.56236	0.378693	1.00015	0.310709	5.0798	5.64361	2.64714	3.14725	3.67974	3.59441	8.4093	8.83825	8.04741	10.2432	8.69838	10.6413
G2W53_000437	9.13037	8.79314	8.81996	4.1368	5.02583	5.87381	2.89066	3.06523	3.1082	8.11537	7.94327	4.32557	2.63818	4.29492	2.65704	2.30149	4.20568	2.22644	4.45246	3.91062	4.19185
G2W53_000438	13.7804	12.7299	13.7766	13.5556	16.6331	14.307	16.325	14.3312	16.1958	19.4609	17.8054	19.0534	18.5343	20.0779	18.43	25.9885	26.6773	26.0203	27.8017	28.2747	27.3325
G2W53_000439	11.426	11.8677	11.3427	11.993	16.1366	11.348	12.3683	9.25555	11.3984	13.9322	13.1035	10.2437	13.4855	10.2525	14.8135	19.8617	19.9685	19.7228	20.2567	17.8774	18.8394
G2W53_000440	8.85336	7.51209	5.5847	11.3898	11.7409	11.4575	8.95651	8.22394	7.81727	2.565	2.46844	1.92415	2.20925	2.1047	2.37712	3.06835	3.49975	3.36691	3.51023	4.16903	4.37466
G2W53_000441	0.492475	0.330627	0.163292	0.555641	1.10345	0.674461	0.0173696	0	0	0	0.0122089	0.0162254	0.0315667	0.0169159	0.0330473	0.0319927	0.0500059	0.0328838	0.0519597	0.0592397	0.061148
G2W53_000442	0.0421891	0.123596	0.0279776	0.0238002	0.025208	0.0198101	0	0	0	0	0	0.035384	0	0.03689	0	0.0348846	0.0408945	0.0358562	0.0424923	0.0904323	0.0933455
G2W53_000443	0.365867	0.119092	0.161749	0	0	0	0	0	0	0	0	0	0.258784	0	0.270922	0	0	0	0	0	0
G2W53_000444	0.543737	4.30086	0	0	0	0	0	0	0	0	0	0	0.0289264	0	0.0302832	0	0	0	0	0	0
G2W53_000445	11.8445	30.8437	4.94552	0	0	0	0.12378	0	0	0	0	0.534723	7.39777	0.371654	7.50273	0.2343	0	0.240826	0	0	0
G2W53_000446	7.53076	6.067	7.49101	19.5423	13.4989	14.1444	24.2237	16.2345	15.2985	6.41325	8.38241	6.68404	8.66926	8.12993	9.83221	8.78627	35.1915	15.0516	29.4316	21.9634	19.3123
G2W53_000447	11.748	11.8031	10.1878	12.5326	12.014	10.5022	12.8768	10.8952	12.1604	1.43762	1.35036	0.905765	1.09793	0.873712	1.14368	0.962528	1.4349	0.926431	1.42319	1.62568	1.61425
G2W53_000448	20.1726	18.4304	19.1653	5.19188	4.58586	4.73607	1.45173	1.70826	1.85742	8.00168	8.13568	3.91128	7.51749	3.74512	7.56525	0.91645	1.32926	0.918026	1.27714	1.69983	1.72787
G2W53_000449	15.3278	17.5974	15.7767	12.7867	14.8868	14.5612	5.91128	6.40734	8.16907	77.1439	76.4734	47.3881	66.6866	47.1715	65.4511	19.9381	18.8833	20.0881	18.7292	18.5844	18.1497
G2W53_000450	0.86685	1.30709	1.02289	1.15782	0.746446	0.544707	1.34885	1.34963	2.676	0.288059	0.251005	0.0970415	0.15733	0.082202	0.131767	0.0956719	0.0747694	0.110629	0.0874023	0.18601	0.160001
G2W53_000451	17.3757	19.7924	22.1609	11.1076	7.94464	6.28027	14.6086	17.5122	22.7598	15.9119	16.131	14.2778	10.543	14.4025	10.9803	10.2423	19.3408	9.87319	18.3768	16.792	17.3012
G2W53_000452	0	0	0	0	0	0	0	0	0	0	0	0	0	0	0	0	0	0	0	0	0
G2W53_000453	0	0.0882473	0.119856	0	0.035997	0	0	0	0	0.0296269	0.278811	0.0411706	0.0266993	0.0858456	0.0838548	0	0	0	0	0	0
G2W53_000454	0	0.212133	0	0	0	0	0	0	0	0	0	0	0	0	0	0	0	0	0	0.335447	0
G2W53_000455	130.504	88.3113	112.289	0.0739913	0	0	0	0.0209444	0	25.6644	24.8923	13.4816	23.0452	13.5207	22.9571	0.0120393	0	0	0	0	0
G2W53_000456	0	0	0	0	0	0	0	0	0	0	0	0	0	0	0	0	0	0	0	0	0
G2W53_000457	133.792	95.3653	119.253	0	0	0.0533751	0	0	0	6.22928	6.36747	7.62087	10.4929	7.21986	10.8313	0.0212691	0.0124667	0.0109307	0	0	0
G2W53_000458	4.42753	4.16916	4.06337	0	0	0	0	0	0	3.78723	3.99089	2.17067	4.66132	2.19901	4.25432	0	0	0.0276685	0	0	0
G2W53_000459	36.5381	26.0793	32.7385	0.0524486	0.166653	0.0873112	0	0	0	15.0924	14.4698	13.4785	19.6292	12.7802	20.2344	0.0763691	0	0.0392481	0	0	0
G2W53_000460	5.86812	5.15731	4.74384	0	0	0	0	0	0	1.75168	1.74154	6.30495	6.49547	5.86603	6.85433	0	0	0	0	0	0
G2W53_000461	0	0	0	0	0	0	0	0	0	0	0.0492842	0	0	0	0	0	0	0	0	0	0
G2W53_000462	6.11376	8.86204	5.8281	0	0	0.0299036	0	0	0	8.07775	8.5561	5.63685	8.66611	6.02874	9.00661	0	0.0374408	0	0	0	0
G2W53_000463	0.381304	0	0	0	0	0	0	0	0	4.05902	1.27328	1.12811	0	0	0.382949	0	0	0	0	0	0
G2W53_000464	0.318762	0.175094	0.15854	0	0	0.0374191	0.0674567	0	0	1.50353	1.65713	0.395283	0.0976543	0.372858	0.0894554	0	0	0	0	0	0
G2W53_000465	48.88	29.7948	43.4118	1.36648	0.593764	1.02073	2.49729	1.99352	1.4882	514.717	517.321	125.667	52.3469	123.871	52.3579	0.496184	0.89487	0.510003	0.883344	0.466449	0.393935
G2W53_000466	0	0	0	0	0	0	0	0	0	0.890729	0	0	0	0	0	0.813543	0	1.6724	0	0	0
G2W53_000467	1.56193	1.47079	1.18376	2.01403	5.19956	3.98139	1.32215	1.8172	1.27851	0.212641	0.377987	0.236394	0.402419	0.184841	0.300925	0.679751	0.705788	0.758571	0.757023	0.496275	0.734985
G2W53_000468	0.894062	2.4681	0.501681	0	0.287647	0.0645864	0	0	0.0358237	0	0	0	0.041921	0	0.0438873	0	0.0996128	0	0.103505	0	0
G2W53_000469	35.9533	29.1785	26.4199	38.9202	42.9641	53.3838	47.2959	44.2231	37.4554	24.8255	32.4481	24.4363	41.0158	34.4679	40.9879	94.476	78.6341	82.5412	80.5557	68.2256	74.7572
G2W53_000470	8.86478	10.7788	10.9583	19.2268	18.8727	23.7222	16.6834	17.1519	17.3047	15.0253	16.669	12.3496	27.7416	12.6097	25.5854	51.1277	50.4207	50.3155	53.2062	52.0614	51.8193
G2W53_000471	43.3019	44.9854	44.3998	35.8453	41.6215	44.7538	51.2463	45.5469	47.3175	22.3839	22.7	18.2367	16.4781	18.4752	16.3757	8.4427	8.99418	8.36114	9.00781	10.3555	10.106
G2W53_000472	63.4471	55.6054	66.0787	46.5581	40.8521	50.0065	15.2505	17.478	19.1111	27.2105	27.1816	16.8939	16.6185	16.6153	16.7578	7.23749	7.09108	7.22992	7.27802	7.54245	7.54147
G2W53_000473	4.5156	4.31189	4.20747	3.38577	4.50816	3.56965	3.31434	2.82042	3.00715	4.96731	4.88546	2.52873	3.23546	2.63635	3.43362	4.31228	5.26583	3.92451	4.65084	8.58375	9.11783
G2W53_000474	97.5094	101.811	90.41	42.1687	39.1967	38.1375	19.4545	24.9063	33.3574	1.55577	1.64657	1.10509	1.7177	1.09726	1.77445	0.504395	1.07784	0.49178	1.08485	1.28728	1.28908
G2W53_000475	0.885971	0.324439	0.881295	0	0.264683	0	0	0	0	0.943124	0.986166	1.3106	1.69985	1.36638	0.889793	0.430699	0	0.442695	0	0.478506	0.49392
G2W53_000476	0	0	0.97444	0.414472	0.438987	0.344986	0.310959	0	0	2.34631	2.45339	1.08684	0.704818	0	0	0.714331	0	0.734226	2.61034	0	0
G2W53_000477	36.8862	42.4943	38.3292	0.903634	0.957083	0.919282	0.169489	0.277103	0.254946	32.7722	32.908	35.6792	42.9277	36.148	42.8204	0.339369	0.67632	0.366262	0.702746	0.546705	0.603235
G2W53_000478	0	0	0	0	0	0	0	0	0	0	0	0	0	0	0	0	0	0	0	0	0
G2W53_000479	3.20983	5.30448	3.32934	6.03589	7.91736	4.94668	0	0.315425	0.128613	0.855771	1.02642	0.594603	0.18146	0.583444	0.118732	3.42531	4.33881	2.95362	4.28432	3.26916	3.69083
G2W53_000480	19.9748	24.4433	20.7817	20.9847	17.8917	14.5639	12.5225	15.6461	18.278	10.0061	9.75297	6.26121	8.46887	6.35813	8.65632	8.89316	13.0065	8.41573	13.0851	12.101	11.7553
G2W53_000481	1.97408	1.60644	2.56973	0.989904	1.57268	0.995602	3.28017	5.5341	5.90309	0.363014	0.60733	0.908021	0.850569	1.05185	0.958962	1.19361	2.79848	1.36317	2.6655	1.25242	1.36881
G2W53_000482	7.42469	2.33047	6.33043	0	0	0.0498043	0.044892	0.152437	0.110498	4.01246	3.93335	0.464653	0.165731	0.411765	0.189278	0.0458095	0.0537016	0.0470854	0.0557998	0	0
G2W53_000483	3.06609	3.23048	2.35432	3.12556	3.05331	2.32373	1.1611	1.46884	1.70917	1.02744	0.875379	0.42304	0.205758	0.496176	0.287212	1.25121	3.17799	1.17889	3.04815	2.2782	2.19216
G2W53_000484	34.2649	33.0927	35.3576	29.8233	30.1475	28.6071	37.9611	34.0925	33.4214	12.48	11.7407	9.91009	11.1442	10.2769	11.0943	7.29302	9.15868	7.28248	8.8202	11.2204	10.966
G2W53_000485	36.817	37.4749	40.5602	37.4009	31.422	34.037	9.37279	11.7949	12.1562	18.0146	17.6882	11.5651	10.3533	10.859	10.3634	11.4727	15.3448	11.501	15.2974	18.0701	18.3138
G2W53_000486	469.746	467.819	506.032	414.457	482.861	431.173	325.473	398.382	329.185	282.848	280.3	262.878	283.707	260.724	280.965	243.497	245.315	243.837	238.063	284.691	287.964
G2W53_000487	36.4498	39.4208	41.7054	2.98316	2.93392	3.01511	6.27474	4.88563	5.21387	11.0958	11.6843	19.2375	18.7252	19.4117	18.2456	0.573641	1.34493	0.540483	1.45571	2.38992	2.46691
G2W53_000488	0	0	0	0	0	0	0	0	0.0716474	0	0	0	0	0	0	0	0	0.0764043	0	0	0
G2W53_000489	21.3693	20.3648	23.0493	12.2003	12.922	13.4191	6.64708	5.05691	4.96204	29.5996	31.8102	31.992	34.5782	33.7506	31.0287	18.0231	25.2364	20.5834	29.5765	24.1952	24.4005
G2W53_000490	20.5718	20.9856	20.9505	9.94732	10.9747	14.4894	5.2863	9.50314	6.88864	25.0273	22.8983	24.9972	16.9156	27.1942	19.9227	19.2869	30.1462	24.2295	31.3241	37.3001	27.0331
G2W53_000491	20.9157	25.0931	21.4878	12.6607	12.2591	11.5359	11.5503	11.7269	13.6271	23.4692	24.1003	17.5844	16.024	17.5201	15.9817	11.7568	12.6643	11.3381	12.4136	14.6905	14.7557
G2W53_000492	0	0	0.081869	0	0	0.0579689	0	0	0	0	0	0	0	0	0	0.132025	0	0.135702	0	0	0
G2W53_000493	28.5093	31.3199	34.958	16.9933	21.0518	21.2166	6.48849	10.0499	8.26568	3.98783	4.49058	2.64292	3.37261	2.75541	3.29927	3.08192	2.89029	2.87978	2.69608	3.39287	3.43791
G2W53_000494	0	0	0	0	0.224981	0.176805	0	0	0	0.116888	0.122222	0	0.105337	0	0.110278	0	0	0	0	0	0
G2W53_000495	0.398603	0.0417048	0.0377619	89.3998	62.8416	50.4279	9.78492	18.4953	20.2586	0	0	0.0388607	0	0.0405146	0.0263834	45.2339	76.6808	44.026	75.8813	88.7049	86.4366
G2W53_000496	0.912819	1.33708	1.21067	2.31727	4.63597	3.42895	0.772686	1.31188	0.950957	0.485852	0.508025	0.675156	1.31352	0.70389	1.37513	15.5313	14.0454	15.9639	10.8105	4.93006	3.56221
G2W53_000497	2.40984	3.52989	1.59808	12.2352	10.7991	13.5786	1.52992	2.30891	1.88289	2.5653	5.36475	1.78241	2.3118	3.71654	6.05059	19.9155	21.9732	19.2661	17.1238	13.0154	8.06078
G2W53_000498	0.173121	0.31698	0.172207	9.52213	6.77529	9.79541	96.9022	92.8872	99.6906	0.0785295	0.0821134	0	0.141539	0	0.148178	11.6194	12.1077	11.1321	12.2313	11.3951	11.4331
G2W53_000499	1.42183	1.48935	1.83095	2.91927	2.6079	2.41433	1.10559	0.982111	1.15399	0.935081	0.894739	0.625192	1.09707	0.498436	1.08195	1.11994	2.78633	1.06831	2.71854	2.5243	2.71649
G2W53_000500	1.67893	2.0295	1.70791	0.744838	0.983683	0.757736	0.620908	0.601279	0.704727	0.278753	0.281424	0.480866	0.381142	0.515258	0.408089	0.588209	0.771879	0.55045	0.759263	0.624238	0.664483
G2W53_000501	470.999	556.119	658.202	1.66601	1.15957	1.14899	0.571398	0.606332	0.659277	1.17012	1.17146	0.484351	0.0897439	0.180345	0.0939533	0	0	0	0	0.101051	0.104306
G2W53_000502	0	0.369751	0.111598	0	0	0	0	0	0	0	0	0	0	0	0	0	0	0	0	0	0.00790955
G2W53_000503	8.70221	6.56952	8.61189	0.906312	1.27989	0.502913	0.113327	0.192409	0	0.271173	0.283549	0.141312	0.122188	0.0982173	0.159899	0.0619187	0	0.0636433	0	0	0
G2W53_000504	0.386193	0.848532	0.256103	0	0	0.181339	0	0	0	0.411105	0.429867	0	0	0	0	0	0	0	0	0	0
G2W53_000505	84.6925	90.0681	90.0707	24.4966	27.6538	29.6313	36.845	38.151	38.7629	173.006	172.346	69.5679	46.0954	69.4796	46.1157	27.6677	28.4591	27.5059	28.2293	34.0981	33.9086
G2W53_000506	80.652	81.4864	22.8758	20.5565	23.8044	26.6919	15.0113	17.6892	17.4623	58.9605	55.1617	29.4673	27.0332	29.2228	30.253	15.1162	21.5967	12.624	20.1389	27.8151	20.5853
G2W53_000507	9.36256	7.75145	9.98801	0.918559	2.189	1.72027	4.3072	4.0952	5.30094	7.27083	8.47988	0.388607	1.00805	0.405146	1.05534	3.32039	2.09592	3.6754	2.17782	1.13506	1.17163
G2W53_000508	18.1593	13.1432	12.5145	2.85231	2.85082	2.80882	0.241122	0.13646	0.222564	17.7008	17.2944	8.09867	8.10787	8.16033	8.3653	0.624475	0.801779	0.57055	0.808959	0.825941	0.829813
G2W53_000509	1.6735	0.817104	0.369926	0	0	0	0	0	0	0	0	0	0.535139	0	0	0	0	0	0	0	0
G2W53_000510	14.6669	18.5213	14.9602	3.17234	3.28138	2.42432	0.153103	0.126032	0.222686	25.7748	26.3599	30.4791	21.9867	31.1252	21.8691	1.50939	1.39692	1.61948	1.32248	0.750207	0.75919
G2W53_000511	0.371889	0.817104	1.10978	0.419589	0.111102	0.261934	0.393498	0.445392	0.0968567	0.218571	0.17141	0.379667	1.00948	0.395826	1.21149	0.0499078	0.0585059	0.0512978	0.0607919	0.0554474	0.0572336
G2W53_000512	0.165058	0.241773	0.383102	0.0931142	0.443798	0.232511	0	0	0.0429885	0	0	0	0	0	0	0.1541	0.165594	0.131993	0.172064	0.171205	0.147267
G2W53_000513	8.26907	8.4354	13.9049	1.91592	2.38215	2.49607	0.56247	0.778126	0.846072	10.8214	10.0667	10.1635	10.9627	10.3798	10.8432	0.817961	1.43832	0.770681	1.41149	0.530106	0.547183
G2W53_000514	16.0413	17.8898	18.7067	7.45548	8.25044	8.51661	14.9867	13.1863	16.1418	14.7743	14.6752	12.0643	11.7181	12.2675	12.1391	4.8536	5.91904	4.82432	5.91209	6.71573	6.68741
G2W53_000515	51.4653	54.4847	57.7445	51.2552	59.0233	58.0665	49.9133	45.9796	45.9924	10.4235	10.116	11.3406	13.2746	11.4616	13.4997	9.6485	11.8621	9.81469	11.1624	13.427	13.7615
G2W53_000516	0	0	0	0.226578	0.23998	0.377184	0.594968	0.481023	0.523026	0	0	0.213775	0.0462114	0.222874	0.0483789	0.18734	0.0549038	0.144419	0.0570491	0.104067	0.10742
G2W53_000517	46.2353	42.4134	48.9335	26.3463	32.2298	24.3416	12.0575	10.851	9.00092	8.06456	8.56168	10.2919	7.3418	9.23969	7.72499	5.41156	8.28226	5.60091	8.83475	8.68433	8.10215
G2W53_000518	1.5762	1.924	1.1614	27.927	31.7415	31.6879	5.38634	7.15941	7.38926	0.211477	0.147419	0.163264	0.169404	0.204255	0.155181	19.6586	16.7808	19.434	16.7307	20.2908	20.5999
G2W53_000519	10.0247	11.1742	10.1826	6.01388	5.20086	6.08485	0.827878	1.82726	1.9104	16.3074	16.6345	10.3951	11.8646	10.0428	11.8095	9.61069	11.3198	9.1293	11.0963	12.145	12.6407
G2W53_000520	8.47774	4.88795	5.26314	3.35797	2.90993	3.30319	3.20642	2.50593	1.97309	2.25947	2.93534	2.28352	1.85109	2.4799	1.42114	1.37579	1.90604	1.15699	1.752	1.66745	2.15145
G2W53_000521	13.3213	13.2723	15.3601	8.32742	8.46144	8.34013	6.0445	5.11686	5.31361	7.64195	7.61468	6.68404	4.94229	6.64288	5.13169	3.9415	6.06446	4.26229	7.00157	7.25271	7.10968
G2W53_000522	23.8365	26.0905	27.0979	24.0862	35.0579	35.1765	40.9087	37.1433	37.6579	46.2869	44.9006	43.0103	39.954	43.225	39.4604	89.9001	69.8606	87.9539	75.072	67.0574	73.8905
G2W53_000523	0	0	0.153662	0.130718	0.415349	0.108803	0	0	0	0	0	0.518143	0	0	0.175889	0.170276	0.199612	0	0.207411	0.378353	0.390542
G2W53_000524	50.6416	48.6	58.7701	41.8677	55.8214	44.6881	23.2814	19.8683	18.647	48.7964	51.5093	53.6015	43.9745	57.9026	45.5987	60.2729	48.7631	55.4075	43.9471	52.8159	51.11
G2W53_000525	0.0446267	0	0	0.100701	0.373302	0.167638	0	0	0	0	0	0	0.061857	0	0.0647584	0.188076	0.0367462	0.193314	0.038182	0.104476	0.107841
G2W53_000526	0	0	0	0	0	0	0	0	0	0	0.00732248	0	0.0126218	0	0.00660689	0	0	0	0	0	0
G2W53_000527	16.8914	16.4948	4.6673	0.0794081	0.084105	0.132191	0.238305	0	0.146643	0.434415	0.403769	2.07933	3.61038	2.72727	3.68865	0.220428	0.206723	0.135941	0.2148	0.048979	0
G2W53_000528	32.8438	35.0142	36.3435	31.7575	34.2165	37.9922	62.8144	51.0815	57.6341	23.814	23.9153	23.336	20.5247	23.5767	20.707	24.8602	23.4792	25.1192	23.6904	29.591	29.1742
G2W53_000529	6.54848	1.91842	0	0	0	0	1.66295	1.25484	0	4.18255	4.37343	1.9374	5.02566	2.01986	0	0	1.49275	0	0	0	0
G2W53_000530	32.0947	33.1328	34.7946	19.0325	19.3075	20.7794	51.1827	38.6218	45.2465	9.43848	9.5799	10.8944	10.4175	11.0017	11.1382	6.99195	5.5631	6.92693	5.40422	7.23768	6.98781
G2W53_000531	19.4368	23.4794	21.8923	3.50632	3.53454	3.76331	1.67299	1.61937	2.20097	9.20764	8.94153	8.43923	12.6429	8.23851	12.7729	0.761977	1.71425	0.771682	1.67886	1.42545	1.51634
G2W53_000532	11.8936	14.8436	12.4574	5.30911	3.60855	3.89711	4.06159	5.59123	7.14095	9.87028	10.1167	3.45726	5.27541	3.39238	5.04727	2.06439	3.67358	2.06082	3.78094	5.57707	5.77376
G2W53_000533	41.1819	42.129	44.2756	47.7676	55.2282	57.1589	7.92903	11.4259	12.2517	10.8995	11.2803	7.30609	8.04571	7.61704	8.18912	13.3187	16.3966	12.9214	16.6647	16.9361	17.2479
G2W53_000534	3.96356	5.80574	6.13299	3.72661	4.57856	3.34999	0.671017	0.632925	0.550554	2.52576	2.00948	1.52604	1.18757	0.875042	1.7613	0.702099	1.17579	1.59795	0.916302	2.17294	2.30045
G2W53_000535	2.62347	2.71055	2.79602	1.10999	0.895725	1.31985	0.912082	1.30168	1.17132	3.82481	3.88231	1.65934	1.89997	1.59481	1.86587	0.647553	0.459463	0.560495	0.456658	0.681564	0.801232
G2W53_000536	3.44263	7.56405	4.56595	3.88419	0.514242	0.404126	0.364266	0.412306	1.34492	7.32942	5.74794	3.81945	2.47693	2.65467	3.45748	0.836787	0	0	1.01928	1.85934	0
G2W53_000537	30.9483	36.4675	35.5737	22.813	27.3675	27.0617	20.4921	19.834	17.8402	14.2401	13.2517	9.04752	11.3268	8.92817	11.5296	10.2713	12.6	10.0671	13.0149	14.803	14.8423
G2W53_000538	1.63458	3.47744	0.309706	0	0	0	0	0.0372886	0	0	0	0	0.514666	0	0.419071	0	0	0	0	0	0
G2W53_000539	0.150615	0.551546	0.0998801	1.18953	0.764935	0.884026	0.0637466	0.180384	0.156908	0.055962	0	0	0.100864	0	0.105595	0.664465	1.13845	0.630435	1.36971	1.24929	0.937845
G2W53_000540	5.27061	6.1119	6.14087	3.09721	2.84302	3.72945	20.3555	11.6953	12.2018	0.906807	0.894393	0.786463	0.846177	0.847887	0.879799	0.599144	0.908941	0.579606	0.901526	0.99847	1.11147
G2W53_000541	3.37198	3.21049	2.08705	3.48744	5.84279	4.90832	0.0951442	0.161538	0.234191	1.87857	1.064	1.19649	0.564313	1.47422	0.66463	3.71754	3.60373	3.96805	3.48329	2.30337	2.95147
G2W53_000542	0	0	0	0	0	0	0	0	0	0	0	0	0	0	0	0	0	0	0	0	0
G2W53_000543	0.939617	2.67171	0.879678	0.405346	0.429321	0.441202	0	0	0.0575809	0	0	0.0957599	0.227703	0	0.238383	0.125878	0.172158	0.258767	0.15333	0.303008	0.312769
G2W53_000544	0.237657	0.290096	0.367738	0.279312	0.307666	0.455671	0.0251466	0.0664134	0.0722127	0.233492	0.297224	0.296253	0.20127	0.279447	0.191555	0.166898	0.347825	0.162016	0.361415	0.442956	0.425326
G2W53_000545	0.72151	1.05685	1.31579	0.101757	0.754427	0.59288	0	0.259234	0.0939568	1.32917	1.2161	0.692647	0.74864	0.962834	0.783756	1.36574	1.42314	1.40378	0.924215	0.337185	0.696095
G2W53_000546	8.66583	10.6472	8.78656	17.8184	18.1159	15.3026	2.62377	3.46127	4.18421	5.40709	5.45711	3.96336	6.08651	3.95987	6.24119	13.2599	16.1911	12.8762	16.2398	18.5804	18.3907
G2W53_000547	46.2316	42.5899	51.0083	22.1277	21.0784	16.2623	29.0098	30.1733	28.4867	91.3969	96.0786	79.8466	81.1918	80.415	80.4698	66.0085	76.509	63.9504	75.5144	84.4842	82.8583
G2W53_000548	253.204	210.212	308.875	54.1863	61.1269	65.9183	14.6737	14.8391	12.1382	51.0027	49.8111	41.6307	37.1635	42.4916	38.2437	24.4232	20.2752	25.5201	19.3804	17.3388	17.8973
G2W53_000549	1.12399	1.31712	0.745374	1.01453	6.3129	0.949998	0	0	0.234191	0.2393	0.250221	1.6627	0.862613	1.73346	1.35461	3.27846	4.09949	2.69582	2.92852	4.37083	4.01034
G2W53_000550	2.97511	2.85987	3.08272	112.03	120.323	153.755	501.316	524.493	490.773	0.986653	1.21591	0.783477	1.17495	0.816822	0.99735	41.1635	36.7856	41.7145	36.9684	47.1628	46.1723
G2W53_000551	14.4418	17.5861	15.6176	9.85451	9.02507	6.93009	10.0531	9.72173	11.9971	4.06344	3.86512	4.13483	3.7564	4.17788	3.79656	3.89091	7.11552	3.69164	7.32063	8.52586	8.4161
G2W53_000552	38.6888	41.6142	39.1947	63.3828	76.0031	59.4602	45.9217	58.7487	60.3835	34.424	35.9951	26.7736	31.8723	27.7179	31.397	30.7027	28.4908	30.1033	29.8288	37.1184	37.4674
G2W53_000553	31.0486	31.8602	27.6205	8.75774	9.70309	8.02044	3.57907	3.40613	4.01035	41.2258	41.2344	36.3346	34.4204	36.8386	34.0707	3.14594	4.24521	3.17608	4.05343	5.77862	5.85253
G2W53_000554	0.811005	0.806105	0.499401	0	0	0	0.0245179	0.083254	0	0.17022	0.152562	0.135168	0.131485	0.14092	0.11471	0	0	0	0	0	0
G2W53_000555	0.0984413	0	0.0652811	0	0	0	0	0	0	0	0.0318471	0	0.0686185	0	0.071837	0	0.0163051	0.042889	0	0	0
G2W53_000556	0	0.137886	0.374551	0	0	0	0	0	0	0	0.154041	0	0	0	0	0	0.157733	0	0	0	0
G2W53_000557	0	0.030098	0.0272524	0	0	0	0	0	0	0	0	0	0	0	0	0.0299617	0	0	0	0	0
G2W53_000558	51.3142	42.9692	75.1424	1.03738	1.46499	1.35688	0.037062	0	0	1.69762	1.74396	6.33225	1.44935	6.34286	1.46113	0.489637	1.59442	0.475315	1.72299	1.32974	1.46616
G2W53_000559	11.6727	10.7551	12.9844	30.2694	34.0846	22.6311	0	0	0	15.2031	14.8919	18.0912	19.4487	19.3675	20.1961	10.2147	17.1198	10.4992	16.8167	14.8063	14.9172
G2W53_000560	0.0990889	0	0	0	0	0	0	0	0	0	0	0	0	0	0	0	0	0	0	0	0
G2W53_000561	0	0	0	0	0	0	0	0	0	0	0	0.0453463	0	0	0	0	0	0	0	0	0
G2W53_000562	0	0.0538093	0	93.8364	123.751	79.4157	0.342055	0.281574	0.344432	0	0	0	0.0245692	0	0.0257217	16.4968	23.3234	16.2268	24.2651	26.9317	27.2424
G2W53_000563	0.322171	0.117978	0.213647	18.0384	16.9879	13.2746	0	0	0	0.16311	0.189504	0.0755543	0.130659	0.0262566	0.11969	3.443	5.54971	3.69202	5.56493	5.4435	5.59987
G2W53_000564	121.202	100.78	90.6242	1.69044	2.26159	1.37001	0	0	0	8.55749	8.64249	5.85887	9.83732	6.04775	10.0624	0.11438	0.0223475	0.117565	0.0464413	0.084717	0.0874461
G2W53_000565	174.089	180.308	191.419	0.225975	0	0.150472	0	0	0.0417308	0.781196	0.855745	0.51694	0.569905	0.538942	0.631732	0	0.0398297	0	0	0	0
G2W53_000566	0	0	0	0	0.305059	0.479472	0.21609	0	0.797837	0	0	0	0	0	0	0	0	0	0.337615	0.307934	0.317854
G2W53_000567	9.5846	8.78933	6.83672	0	0	0	0	0	0	8.29185	8.46301	3.16757	17.7732	3.58955	18.7627	0.0301726	0.106112	0.031013	0	0	0
G2W53_000568	9.81176	8.05911	12.7701	1.06047	0.931428	1.16255	3.29891	2.06467	2.12554	13.3606	13.3574	2.72993	3.12364	2.72691	3.21193	0.535462	1.29947	0.569687	1.27015	1.33591	1.3143
G2W53_000569	4.41804	6.17731	5.32694	2.37907	2.15982	1.79163	2.88985	1.44307	2.19671	4.76231	4.48169	1.76476	3.14725	2.18485	3.07023	0.652446	2.12458	0.596105	2.03098	2.89946	3.57481
G2W53_000570	1.68914	2.47422	1.77357	0.317633	0.50463	0.462668	0.0595763	0	0	0.313011	0.309113	0.169155	0.109698	0.151161	0.0820308	0	0	0	0	0	0
G2W53_000571	160.349	167.79	193.373	107.393	133.703	125.905	152.992	105.776	103.324	86.1079	86.9145	70.561	53.8828	72.4336	55.0139	54.61	53.1564	53.4533	54.006	59.5248	60.5968
G2W53_000572	0.794803	1.80453	0.790608	0	0	0	0	0	0	0	0	0	0.0179636	0	0	0	0	0	0	0	0
G2W53_000573	0.941345	1.37886	0.624251	5.31042	5.3433	7.51422	2.78891	2.48028	4.16786	1.00207	0.523901	0.696254	0	0	0	45.3042	26.2864	36.6884	27.8708	31.0131	30.4378
G2W53_000574	1.77194	3.89326	2.35012	13.9945	12.1754	17.8885	5.99968	11.0352	5.07643	0	0	0	0	0	0	53.4067	35.343	58.4358	26.2314	43.0655	54.3312
G2W53_000575	1.3097	0.239802	0.434261	0	0	0	0	0	0	0	2.18672	0.484351	1.88462	1.00993	0.328837	0.636686	0	0.32721	0	0.353678	0.365072
G2W53_000576	20.9276	21.4812	24.1815	6.88678	8.33614	9.30554	5.56944	5.08872	4.95498	2.07119	2.22804	1.88429	1.34282	1.98607	1.50421	2.23195	2.07403	2.29412	1.97272	1.82953	1.90407
G2W53_000577	0	0	0	0	0	0	0.193172	0.437294	0.237739	0	0	0	0	0	0	0.356441	0	0.274776	0.108544	0	0
G2W53_000578	15.1902	19.4219	14.171	3.34057	5.69183	5.92373	0.217937	0.493357	0	0.822211	0.859735	1.90428	1.23494	0.794133	1.03429	4.00514	6.45581	4.63127	7.6228	6.39643	6.02836
G2W53_000579	16.2664	23.6797	12.1188	0.906312	1.67986	1.60303	0.424977	0.192409	0.313816	0.10223	0	0.142062	0.460641	0.148109	0.482247	0.840344	1.42295	0.767778	1.47855	0.414942	0.535387
G2W53_000580	10.1063	13.4264	13.5598	9.50213	9.40883	8.58965	10.0967	10.3586	11.8956	6.56887	6.40469	4.62447	4.6593	4.72347	4.66854	3.12757	4.08983	2.98829	4.3784	4.41436	4.37471
G2W53_000581	15.6364	17.9077	18.4003	14.7016	16.4872	20.8027	9.89451	11.6767	10.5404	7.23458	7.16427	6.88954	6.92237	7.21359	7.24706	6.56881	8.52065	6.71181	8.21441	8.22636	7.95648
G2W53_000582	3.0123	3.9221	1.9976	0.944075	1.39988	1.41444	0.424977	0.481023	0.348684	1.16927	1.11148	3.98827	2.39482	4.00401	2.60744	1.3592	1.82099	1.09769	1.65562	1.40221	1.44738
G2W53_000583	0	0	0	0	0	0	0	0	0	0	0	0	0	0	0	0	0.0337704	0	0	0	0
G2W53_000584	11.0374	12.1256	10.6742	3.37272	4.12179	5.61458	0.389292	0.110158	0.359331	8.56731	8.4464	6.80309	8.82367	7.8019	7.1591	21.4626	24.636	20.6816	23.42	19.6224	27.4333
G2W53_000585	0.0525707	0.128341	0.0348622	2.31323	2.10453	1.43172	0.192834	0.100738	0.273836	0.0387001	0.0404662	0	0	0	0	1.09574	1.41918	1.15351	1.41005	1.47262	1.37819
G2W53_000586	0	0	0	0	0	0	0	0	0	0	0	0	0	0	0	0	0	0.172677	0	0	0
G2W53_000587	0	0	0	0	0	0	0	0	0	0	0	0	0	0	0	0	0	0	0	0	0
G2W53_000588	0.213135	0.260163	0.28268	2.22436	2.95022	1.73469	0.0751729	0.0170173	0.0925164	0.0600783	0.0279201	0.092763	0.162424	0.096711	0.125958	0.975507	1.33654	0.983877	1.32193	1.22603	1.25154
G2W53_000589	3.31196	3.00318	5.85685	88.2586	127.686	95.7525	33.4419	35.0568	40.7467	3.57604	3.77293	1.29831	2.20651	1.30689	2.27961	30.2782	33.5283	30.2142	32.3653	42.9232	44.5422
G2W53_000590	6.12759	5.84544	4.47326	32.5633	31.1051	23.5015	1.17686	2.02276	1.74342	1.13715	1.16818	1.99606	2.33721	2.02321	2.44684	17.4924	19.6302	17.5863	19.1764	14.8386	14.3972
G2W53_000591	22.9018	23.8751	23.6702	51.3292	57.2006	51.1524	7.85917	10.0817	10.6396	1.73079	1.77086	1.20258	1.34173	1.26725	1.39589	2.00576	3.13841	2.00048	3.07469	3.72029	3.65495
G2W53_000592	0	0	0	0.629383	5.99949	1.5716	0	0	0	0	0	1.65038	0	1.72062	0	0	0	0	0	1.20513	0
G2W53_000593	9.70064	9.87173	7.9227	1.81454	3.20312	1.94186	0.410571	0.464717	0.718053	1.4654	1.47468	3.0469	4.22987	3.09676	4.33472	0.795001	0.955557	0.817143	0.907087	1.87829	1.92726
G2W53_000594	0.101767	0.1118	0.0674866	0	0	0	0	0	0	0.216664	0.169914	0.150541	0	0.0784743	0	0	0	0	0	0	0
G2W53_000595	10.6686	10.9543	9.84929	6.49051	8.43679	9.3805	19.9208	15.2324	20.6486	12.8701	13.3815	7.1741	9.04276	7.1634	9.19251	6.50835	8.56384	6.82614	8.65576	11.215	12.1856
G2W53_000596	11.3032	12.1692	12.8176	7.97061	8.67844	9.34115	23.5372	18.3565	18.7818	6.70609	6.63778	5.12832	4.95138	5.14708	4.74191	3.77309	5.30774	3.92989	4.74914	6.48346	6.47597
G2W53_000597	0.320458	0.2347	0.212511	0.903901	1.91473	0.60189	1.89883	1.53518	1.66923	0.73999	0.515841	0.342771	0.889155	0.714719	1.16358	2.47818	3.69742	2.08407	3.29305	1.75207	1.55015
G2W53_000598	96.3937	130.165	96.8837	77.3197	62.9947	86.9881	72.0337	60.6089	61.1941	83.3722	83.8241	49.0163	60.6848	34.8426	52.9427	87.8627	97.8496	91.815	67.7819	118.765	115.874
G2W53_000599	18.5372	15.7202	18.5203	14.9982	19.0915	17.5803	12.5945	12.5027	13.7215	4.58554	4.38674	2.48561	3.39971	2.3087	3.43644	4.60403	4.45705	4.24377	5.28246	6.46808	6.74457
G2W53_000600	92.7074	95.299	92.3093	77.052	88.924	90.2272	58.3907	56.932	60.4704	40.1807	40.2946	32.7835	26.427	34.5192	27.0015	40.0898	43.1723	39.5299	41.3039	42.8229	43.021
G2W53_000601	0.183677	0.672616	0.365415	6.11346	23.3761	16.9043	0	0	0	0	0	0.271709	0.176204	0	0.184469	4.1074	24.2845	4.77247	23.2756	56.347	54.4758
G2W53_000602	65.723	65.7013	62.9339	2.29064	1.91833	2.43869	1.03913	0.949983	1.22969	49.2553	52.0288	31.8487	27.2669	32.9129	27.5975	6.88579	6.56528	7.07757	5.14431	6.83408	6.63309
G2W53_000603	35.7273	26.1663	28.1832	4.87406	5.30188	4.05693	4.24977	2.90851	4.37882	13.2705	15.1521	15.403	10.4929	13.554	9.49802	1.71824	2.23202	1.19331	2.14953	2.16693	2.66278
G2W53_000604	1.2103	1.47735	0.178357	0	0	0	0	0	0	0.196116	0.196863	0.152616	0.219153	0.204572	0.21463	0	0	0	0	0	0.00821657
G2W53_000605	33.8596	34.7651	32.9161	10.2533	9.89503	8.72925	10.1721	10.0551	12.519	7.61016	7.65704	6.43153	6.03237	6.4915	6.02226	1.66675	2.15345	1.64756	2.12528	2.84461	2.86305
G2W53_000606	12.2486	11.9958	12.184	20.8098	25.4021	22.4371	3.64697	4.91258	4.85932	7.80159	7.73002	5.63925	6.83221	5.74253	7.41979	11.8951	13.8433	12.1083	14.2792	15.5776	15.3874
G2W53_000607	10.3213	11.4229	9.0247	8.28102	7.53743	8.93898	4.78908	5.20091	5.57541	4.23167	4.33104	4.16117	2.95708	4.26034	2.79128	3.4883	5.54835	3.4508	5.36616	5.03996	4.99573
G2W53_000608	89.8753	86.8523	97.2603	53.2883	65.6713	57.737	48.0414	49.6794	47.7338	21.6327	21.9213	13.8556	14.8847	14.3394	14.6865	10.6801	11.4133	10.7913	11.5341	11.7808	11.876
G2W53_000609	9.69429	14.4743	10.5398	47.5532	52.4293	47.9816	0.528287	1.3753	1.51706	1.12344	1.10205	1.48069	1.70129	1.49337	1.72645	15.074	18.5637	14.7979	18.8767	20.6724	20.7682
G2W53_000610	12.6517	15.002	21.1746	10.5359	8.2793	9.05243	0.764959	1.73168	2.19671	5.1306	2.68237	8.02085	6.93541	2.78741	4.84047	31.0448	28.1532	18.664	25.6858	27.3322	26.1975
G2W53_000611	19.5535	16.2561	28.387	18.484	21.7876	16.874	2.4604	5.56974	4.40443	15.7518	13.5295	6.25407	4.56277	9.78037	8.49206	19.0112	50.5963	23.2376	50.6956	41.672	51.853
G2W53_000612	23.9982	23.8153	23.4469	12.5644	13.5072	12.5496	3.36997	4.00112	3.91545	4.98087	5.01725	4.10219	4.50695	4.05633	4.49823	2.28852	3.12811	2.26656	3.23905	4.4057	4.51575
G2W53_000613	0	0	0	0	0	0	0	0	0	0	0	0.0227581	0.0295174	0	0	0.0149579	0	0	0	0	0
G2W53_000614	8.43445	10.1484	11.2665	9.99209	11.375	11.4853	2.65186	3.05931	3.70303	5.80664	5.32051	2.91153	1.99603	2.77526	1.86375	2.89777	6.15306	2.4727	5.99388	6.86404	7.02246
G2W53_000615	0.387434	0.283753	0.256926	0.437128	0.578729	0.136441	0.122984	0.324807	0.252263	0.253354	0.264917	0.105621	0.342478	0.110116	0.262931	0.43966	0.922303	0.404337	0.901967	1.00263	1.00839
G2W53_000616	0	0	0	0.278579	0	0	0	0	0	0	0	0	0	0	0	0	0	0	0	0.135201	0
G2W53_000617	0	0.0127231	0	0.00980008	0	0.0081571	0	0	0	0	0	0	0	0	0	0	0	0	0	0	0
G2W53_000618	0.0448259	0.147735	0	0.0758631	0.0937421	0.0841929	0	0	0	0	0	0	0	0.009389	0	0.0177572	0.0416328	0.0121679	0.0432595	0.118369	0.122182
G2W53_000619	0	0.0479605	0	0.332478	0.352144	0.399733	0.360307	0.345082	0.443435	0	0	0	0	0	0	0.578805	1.35704	0.356956	1.62158	0.771661	0.929273
G2W53_000620	9.07817	10.1243	9.9196	3.08441	3.14357	4.31114	13.4043	11.5149	8.9201	1.56619	1.27374	1.11239	1.09777	1.00847	1.05075	3.62386	2.49673	3.88816	3.1751	4.06141	4.30161
G2W53_000621	0	0.113721	0	0.437973	0.0927757	0	0.197154	0	0.161761	0	0	0.0844478	0	0	0.0573335	0	0	0	0	0	0
G2W53_000622	2.69193	2.40195	2.27543	2.75915	2.68448	2.4746	1.4683	1.94347	2.55753	1.78178	1.63478	1.09236	1.09409	1.10089	1.09596	0.829646	1.04739	0.754359	0.942558	1.34715	1.29906
G2W53_000623	67.6953	52.0086	59.9281	4.57041	6.23774	4.36588	0.207119	0.104193	0.368195	28.9125	29.2648	34.779	31.7476	33.6939	32.0399	2.80002	3.79174	2.67952	3.58707	1.98448	1.82696
G2W53_000624	17.352	18.6051	17.4905	14.3308	12.4413	11.6675	3.99518	5.45307	5.92924	5.0964	4.70105	2.21035	4.19787	2.30442	4.05789	2.97965	3.94481	3.03217	3.95449	4.31503	4.40303
G2W53_000625	0	0	0	0	0	0	0	0	0	0	0	0	0	0	0	0	0	0	0	0	0
G2W53_000626	12.5571	10.4884	10.947	5.85017	3.96219	5.30001	10.3308	7.94195	8.89267	24.1726	22.8511	13.8661	7.97901	13.031	8.22067	11.8092	13.5427	12.7977	13.6028	11.9078	12.5858
G2W53_000627	0	0	0	0	0	0	0	0	0	0	0	0	0	0	0	0	0	0	0.019406	0	0
G2W53_000628	0	0	0	0	0	0	0	0	0	0	0	0	0	0	0	0	0	0	0	0	0
G2W53_000629	0	0	0	0	0	0	0	0	0	0	0	0	0	0	0	0	0	0	0	0	0
G2W53_000630	0.51056	0.373929	0.225718	0.480038	0.203373	0.159824	0.0720301	0.244588	0.354594	0.0224135	0.0234364	0.0155733	0.0100993	0.0162361	0.010573	0	0.023998	0.0210414	0.0374036	0	0.0234762
G2W53_000631	2.80004	3.14224	2.87511	1.70698	2.02382	1.35719	0.898378	0.627421	1.29384	2.01916	2.26212	1.60337	1.94961	1.39301	2.13177	1.80028	2.88255	1.3991	2.78123	4.049	3.92767
G2W53_000632	13.0443	15.0198	14.5807	7.70011	9.24029	8.77711	5.29324	5.47593	5.14854	22.8505	22.5002	16.3861	13.4482	18.7243	13.4504	9.00531	10.9134	8.13039	10.9692	14.2637	14.4441
G2W53_000633	1.51197	2.47024	2.77659	2.75568	2.84918	2.18447	1.47676	1.11434	2.05979	0.95773	1.03853	0.591508	0.319663	0.411122	0.368122	1.10152	1.78502	0.965703	1.85477	1.94366	1.93197
G2W53_000634	8.69531	4.54883	7.41378	7.35794	8.72091	5.97857	4.73171	3.57048	8.57332	1.63826	1.85007	2.27658	1.88976	2.46841	2.04022	2.75319	3.57832	2.15316	3.28071	4.65467	3.91233
G2W53_000635	0	0	0.149075	0.380448	0.134317	0.211111	0	0	0	0.348546	0.364453	0.484351	0	0	0	0.318343	0.932967	0.818024	0.969421	1.41471	3.28564
G2W53_000636	0	0	0	0	0	0	0	0	0	0	0	0	0	0	0	0	0	0	0	0	0
G2W53_000637	77.598	75.1322	79.9041	52.233	54.9907	52.9927	5.75776	10.0416	9.54462	8.626	8.19334	6.10517	8.76341	6.22916	8.6437	5.2605	4.53187	5.06751	4.09797	5.62694	5.59776
G2W53_000638	0	0	0	0	0	0	0	0	0	0	0	0	0	0	0	0	0	0	0	0	0
G2W53_000639	0	0	0	0	0	0	0	0	0	0	0	0	0	0	0	0	0	0	0	0.0221601	0
G2W53_000640	0	0	0	0	0	0	0	0	0	0	0	0	0	0	0	0	0	0	0	0	0
G2W53_000641	0	0	0	0	0	0	0	0	0	0	0	0	0	0	0	0	0	0	0	0	0
G2W53_000642	15.7787	13.1798	13.9515	6.59626	7.81752	7.32734	0.588713	0.707999	1.26794	4.36313	4.3114	3.60455	5.68852	3.58418	5.37537	2.91689	4.33446	2.71661	4.53718	6.10095	6.15614
G2W53_000643	3.25403	2.38322	0.616544	0.209794	0.388856	0.349245	0.905044	0.668088	0.532712	0.773334	0.893746	0.197962	0.623556	0.176903	0.537603	1.78439	0.414003	1.81499	0.384897	1.44554	1.30026
G2W53_000644	0	0	0	0.0369421	0.0391271	0.0307487	0	0	0	0	0	0	0	0	0	0.0309158	0.0362419	0.0317769	0.037658	0.0343473	0.0354538
G2W53_000645	2.86517	3.06257	1.33516	356.817	425.486	311.868	16.8134	13.3549	14.8437	0.459784	0.480768	0.391603	1.97818	0.365294	1.83309	108.616	102.206	107.353	102.156	109.535	109.723
G2W53_000646	0	0	0	0	0	0	0	0	0	0	0	0	0	0	0	0	0	0	0	0	0
G2W53_000647	0	0	0	0	0	0	0	0	0	0	0	0	0	0	0	0	0	0.0159558	0	0	0
G2W53_000648	0.924019	2.03023	0.919142	102.064	119.143	82.0463	4.53657	5.48898	5.72762	0.0642009	0.0671309	0.0892157	0.0809995	0.0930127	0.121141	13.4984	18.0785	12.9221	18.4278	19.0748	18.9631
G2W53_000649	0.160229	0.625867	0.318766	0	0	0.0250787	0	0.0255863	0	0	0	0.23925	0	0.249432	0	0	0	0	0	0	0
G2W53_000650	10.6033	13.4136	6.55214	5.84571	9.35921	7.24194	1.22393	2.5398	4.26789	1.42389	1.21817	0.5996	1.2443	0.656375	1.13983	1.10346	3.0029	1.05318	3.09623	2.95538	3.36694
G2W53_000651	5.39044	6.50243	7.35959	5.00856	8.14668	6.84887	0.671017	1.21522	0.825831	1.47998	1.64424	2.9564	3.08425	3.35025	3.05439	3.5483	8.22016	4.51549	9.15879	5.16234	5.03799
G2W53_000652	0	0	0	0	0	0	0	0	0	0	0	0	0.0256259	0	0.013414	0	0	0	0	0	0
G2W53_000653	0	0	0	0	0	0	0	0	0	0	0	0	0	0	0	0	0	0	0	0	0
G2W53_000654	0	0	0	20.9948	23.6677	16.0044	0.896741	0.882611	1.05565	0	0	0	0	0	0	4.30493	6.82996	4.27512	6.66313	6.41897	6.44016
G2W53_000655	0	0.0597881	0.0541356	0.0921048	0.0975527	0.0383317	0	0	0	0	0	0	0	0	0	0	0.104293	0	0.0866943	0.0593045	0.0612149
G2W53_000656	0	0	0	0	0	0	0	0	0	0	0	0	0	0	0	0	0	0	0	0	0
G2W53_000657	14.937	18.0506	14.583	381.156	402.164	387.471	6.46247	8.62661	8.29926	0.424601	0.332984	0.221265	0.741371	0.192235	0.701034	119.978	133.772	119.483	131.854	134.13	132.781
G2W53_000658	0	0	0	0	0	0	0	0	0	0	0	0	0	0	0	0	0	0	0	0	0
G2W53_000659	0	0	0	0	0	0	0	0	0	0	0	0	0	0	0	0	0	0	0	0	0
G2W53_000660	0	0	0	0	0	0	0	0	0	0	0	0	0	0	0	0	0	0	0	0	0
G2W53_000661	0.152909	0.111989	0.304203	154.105	164.179	154.691	0.97076	4.02887	2.82753	0.0085586	0.0089492	0	0.0308514	0	0.0242239	20.4414	20.0684	20.3117	19.6528	24.4993	24.4728
G2W53_000662	0.175134	0.0641332	0.11614	3.11215	4.13337	2.63152	0	0	0	0.0163325	0.0170779	0.136177	0	0.141973	0	1.10388	1.17164	1.34928	1.27193	1.17669	1.28302
G2W53_000663	0	0	0	0	0	0	0	0	0	0	0	0	0	0	0	0	0	0	0	0	0
G2W53_000664	0	0	0	0	0	0	0	0	0	0	0	0	0	0	0	0	0	0	0	0	0
G2W53_000665	0.231716	0.933385	0.153662	0.0326795	0.380737	0.380811	0.0980717	0.249762	0.0301746	0	0	0	0.0165633	0	0.0173403	0.0503607	0.0295184	0.0345089	0.0920153	0	0.0288765
G2W53_000666	0	0.0542059	0	0	0.0442223	0	0	0	0	0.0280095	0.0292878	0	0	0	0	0	0.0149948	0	0	0.014211	0.0146688
G2W53_000667	0	0	0	0	0	0	0.0353167	0.0399742	0.0217324	0	0	0	0	0	0	0.00825312	0	0.00848298	0	0	0
G2W53_000668	0	0	0.0575678	122.039	126.819	172.383	95.0137	192.382	145.603	0	0	0.062264	0	0.129828	0.0422724	114.095	127.466	111.426	122.577	138.262	141.589
G2W53_000669	0	0	0	0	0	0.0574976	0.259133	0.0586614	0.0637837	0	0	0	0	0	0	0	0	0	0	0	0
G2W53_000670	0	0	0	0	0	0	0.0867301	0	0.03558	0	0	0	0	0	0	0	0	0	0.0370069	0.0337535	0
G2W53_000671	0	0	0	0	0	0	0.0481106	0	0.0592105	0	0	0	0	0	0	0	0	0	0	0	0
G2W53_000672	0.228205	0	0	0	0.0454507	0	0	0	0.11887	0	0	0	0	0	0	0.00339855	0.0119521	0.00698641	0.00827943	0.0113273	0.0155896
G2W53_000673	0	0	0	0.366236	0.581847	0.548706	0	0.0622013	0.0338163	0	0	0	0	0	0	0.0522992	0.85833	0.0537559	0.764458	0.522938	0.539784
G2W53_000674	7.45904	5.0427	5.89768	1.45657	1.37131	1.88592	2.54986	1.92409	1.94267	4.00828	2.6195	1.74064	4.741	1.81472	3.54527	1.37285	3.21874	1.88145	3.90192	5.59254	6.29748
G2W53_000675	12.2625	11.4214	10.7835	4.28593	5.17655	5.3198	4.00532	3.32034	4.44341	1.06506	0.969965	0.90712	0.820483	0.696851	0.79414	0.925696	1.74731	0.854718	1.81559	1.55138	1.70932
G2W53_000676	0	0	0	0	0	0	0	0.0392138	0.042638	0	0	0	0.0443214	0	0	0.0898391	0.105317	0.184683	0.328295	0.149716	0.257566
G2W53_000677	0	0.119039	0.107784	0	0	0	0.0229304	0.0259545	0	0	0	0	0	0	0	0	0	0	0	0	0
G2W53_000678	0.147662	0.216292	0	0	0	0	0	0	0	0.157187	0	0.218433	0.141655	0.227729	0.148299	0	0	0	0	0	0
G2W53_000679	0	0	0	0	0	0	0	0	0	0	0	0	0	0	0	0	0	0	0	0	0
G2W53_000680	0	0	0	0	0	0	0	0	0	0	0	0	0	0	0	0	0	0	0	0	0
G2W53_000681	0	0	0	0	0	0	0	0	0	0	0	0	0	0	0	0	0	0	0	0	0
G2W53_000682	0.146228	0	0	0	0	0	0	0	0	0	0	0	0	0	0	0	0	0	0	0	0
G2W53_000683	0	0	0	0	0	0	0	0	0	0	0	0	0.0068101	0	0.0142591	0	0	0	0	0	0
G2W53_000684	0	0	0	0	0	0	0	0	0	0	0	0	0	0	0	0	0	0	0	0	0
G2W53_000685	0	0	0	0	0	0	0	0	0	0	0	0	0	0	0.0449301	0	0	0	0	0	0
G2W53_000686	0.576824	0.797981	0.807542	0	0	0	0	0	0	0.0600491	0.0209299	0	0.10823	0	0.0566535	0	0	0	0	0	0
G2W53_000687	0	0	0	0	0	0	0	0	0	0	0	0	0	0	0	0	0	0	0	0.546864	0.28224
G2W53_000688	0	0	0	0.114049	0	0	0	0	0	0	0	0	0	0	0	0	0	0	0	0	0
G2W53_000689	0	0.155365	0	0	0	0	0	0	0	0	0	0	0	0	0	0	0	0	0	0	0
G2W53_000690	0	0	0	0	0	0	0	0	0	0	0	0	0	0	0	0	0	0	0	0	0
G2W53_000691	0	0	0	0	0	0	0	0	0	0	0	0	0	0	0	0	0	0	0	0	0
G2W53_000692	0	0	0	0	0	0	0	0	0	0	0	0	0	0	0	0	0	0	0	0	0
G2W53_000693	0	0	0	0	0	0	0	0	0	0	0	0	0	0	0	0	0	0	0	0	0
G2W53_000694	91.687	102.036	92.3891	35.0488	36.8969	25.9904	5.49814	7.48592	8.04153	18.646	17.6656	17.8083	20.9417	17.9164	19.3447	3.51139	5.23688	3.50893	4.96626	4.91977	4.74269
G2W53_000695	56.976	62.8325	56.9432	23.5476	22.0441	18.1366	15.1429	15.5734	16.7128	10.1355	10.4406	8.89523	11.6609	8.59352	11.7231	2.86051	4.28295	3.05247	4.2236	5.30419	5.51218
G2W53_000696	0.367354	2.15237	1.94888	1.24342	2.85342	1.72493	1.08836	0.175984	0.574053	1.8254	1.71784	1.01466	0.329004	1.05784	0.344436	1.33378	1.75901	1.37093	2.64006	0.370456	0.38239
G2W53_000697	0.266575	0.195237	0.353558	0	0.159279	0	0	0.127705	0.277713	0.30267	0.210989	0.0701001	0	0.365418	0.142777	0	0.162034	0	0.168365	0	0
G2W53_000698	0	0	0	0	0	0	0	0	0	0	0	0	0	0	0	0	0	0	0	0	0
G2W53_000699	0	0	0	0	0	0	0	0	0	0	0	0	0	0	0	0	0	0	0	0	0
G2W53_000700	0.118595	0.260573	0.157292	0.0669029	0	0	0.0501942	0.0568138	0.370648	0.378735	0.660033	0	0.341309	0	0.357318	0	0.13517	0	0.140452	0	0
G2W53_000701	3.59803	2.20618	2.38603	2.45459	1.49987	1.53231	2.37279	1.04222	2.04852	1.45909	1.52568	0.732189	0.547878	0.733991	0.72653	0.721855	0.846215	0.589763	0.834188	0.98705	1.0613
G2W53_000702	0	0	0	0	0	0	0	0	0	0	0	0	0	0	0	0	0	0	0	0	0
G2W53_000703	1.52063	2.3865	1.77671	0.285946	0.129797	0.068002	1.01136	0.728472	0.792083	1.34858	1.37397	0.864937	0.373944	0.500972	0.326236	0.0947477	0.0370236	0.0973866	0.0384702	0.105264	0.108655
G2W53_000704	2.92009	1.91353	2.44604	0.520204	0.275487	0.288662	1.82133	1.25164	1.84127	1.45511	1.26793	1.12337	0.728509	1.40541	0.305072	0.295337	0.432771	0.0758906	0.359745	0	0
G2W53_000705	0	0.100509	0	0	0	0	0.290417	0.394461	0.6791	0.103439	0.0540801	0	0	0	0	0	0.110752	0	0.11508	0	0
G2W53_000706	0.126567	0	0.167866	0	0.0756239	0	0.482117	0.0606332	0	0.05269	0.0550946	0	0.0118708	0	0.0124276	0	0	0	0	0	0
G2W53_000707	386.787	432.098	377.299	59.2253	60.2789	54.3179	27.1583	21.4326	20.0545	105.16	104.589	163.09	273.248	163.689	269.448	15.457	20.6663	14.7227	20.1701	26.7908	26.6069
G2W53_000708	0	0	0	0	0	0	0	0	0	0	0	0	0	0.219136	0.0713513	0	0	0	0	0	0
G2W53_000709	1.59425	2.76541	0.723366	13.7272	9.97687	7.6435	0.0355134	0.200985	0.262242	0.0320983	0.0335632	0.267629	0.318191	0.325523	0.302832	5.07182	7.45776	4.82135	7.32063	6.93761	7.06024
G2W53_000710	2.84948	3.72666	2.56449	5.51135	5.10768	4.30067	0.689152	0.975047	0.954169	0.246032	0.321576	0.12821	0.49887	0.133667	0.551285	0.505604	0.889063	0.490814	0.923801	0.905	0.966366
G2W53_000711	0	0	0	0	0	0	0	0	0	0	0	0	0	0	0	0	0	0	0	0	0
G2W53_000712	0	0	0	0.212417	0.224981	0.0884026	0.0796833	0	0	0	0	0	0.0380983	0	0.0398853	0	0	0	0	0	0
G2W53_000713	0	0	0	0	0	0	0	0	0	0	0	0	0	0	0	0	0	0	0	0	0
G2W53_000714	0	0	0	0	0	0	0	0	0	0	0	0	0	0	0	0	0	0	0	0	0
G2W53_000715	87.3914	103.513	91.8897	24.611	33.5558	25.6876	18.318	15.0942	19.4421	30.1927	33.5297	23.1313	18.0528	23.6982	18.0158	26.5892	30.1669	25.6385	30.7043	35.3901	36.9075
G2W53_000716	0	0	0	0	0	0	0	0	0	0	0	0	0	0	0	0	0	0	0	0	0
G2W53_000717	0.323904	0	0	2.92359	1.16119	0.912543	0.137089	0	0	0	0	0	0	0	0	0.0469728	0	0.0482811	0	0.0260933	0.0538678
G2W53_000718	0	0	0	0	0	0	0	0	0	0	0	0	0	0	0	0	0	0.0135682	0	0	0
G2W53_000719	0	0	0	0	0	0	0	0	0	0	0	0	0	0	0	0	0	0	0	0	0
G2W53_000720	0.184615	0.225351	0.040809	1.30184	1.0663	0.780182	0.0130228	0.0737012	0.0320547	0.0290367	0.0303619	0.0807008	0.0915859	0.0841354	0.0958817	1.28625	1.10368	1.36296	1.1145	0.883928	0.866783
G2W53_000721	0	0	0	0	0	0	0	0	0	0	0	0	0	0	0	0	0	0	0	0	0
G2W53_000722	180.048	157.329	158.863	43.0152	31.9301	31.8303	20.5352	18.5065	21.2963	125.427	126.153	101.047	95.5735	101.46	93.8646	26.0447	41.9586	25.3135	41.6386	45.4034	45.9436
G2W53_000723	0	0.596265	0	1.83712	0.972891	1.91141	4.13491	3.12015	1.27223	5.19993	0.906207	6.02166	3.12406	2.51118	0.817648	7.91556	4.63962	4.06801	10.606	13.1912	9.07746
G2W53_000724	0	0	0	0.076893	0.0814411	0.0640019	0.0288446	0.0652973	0.070999	0	0	0	0	0	0	0.0365851	0.00857758	0.0225624	0.00891273	0.0162584	0.0167821
G2W53_000725	3.61243	4.60866	2.43422	4.96324	4.14278	4.32266	3.05786	3.23783	4.12756	2.09251	1.95146	1.02166	1.42704	1.22901	1.49397	2.58268	4.84419	2.65461	4.78179	5.68131	6.10127
G2W53_000726	90.1116	82.6533	87.4734	24.3039	19.6906	34.132	75.9874	66.1921	61.3773	43.4557	44.15	49.5129	35.1833	49.5022	36.455	12.5668	15.3763	13.0782	15.4349	15.0088	15.5223
G2W53_000727	0	0	0	0	0	0	0	0	0	0	0	0	0	0	0	0	0	0	0	0	0
G2W53_000728	0	0	0	0	0	0	0	0	0	0	0	0	0	0	0	0	0	0	0	0	0
G2W53_000729	14.702	14.3665	12.3459	18.7738	20.6959	15.9453	9.8579	10.2967	12.6525	7.73025	7.74625	5.34979	4.82393	5.02195	5.00679	8.58734	9.04859	8.33696	9.095	11.0502	11.0206
G2W53_000730	51.6986	55.6846	47.6773	38.4586	42.7103	38.8081	11.4073	12.2843	13.3928	36.0745	35.24	23.9786	23.8356	24.257	23.4274	17.2376	16.5123	17.4393	16.0176	19.3972	19.5137
G2W53_000731	0	0	0	0	0	0	0	0	0	0	0	0	0	0	0	0	0	0	0	0	0
G2W53_000732	0.228638	0.167452	0.151621	0	0.0683054	0	0	0	0	0	0	0	0	0	0	0.0229376	0	0	0	0	0
G2W53_000733	0	0	0	0	0	0	0	0	0	0	0	0	0	0	0	0	0	0	0	0	0
G2W53_000734	0	0	0	0	0	0	0	0	0	0	0	0	0	0	0	0	0	0	0	0	0
G2W53_000735	0	0	0	0	0	0	0	0	0	0	0	0	0	0	0	0	0	0	0	0	0
G2W53_000736	0	0	0	0.414472	0	0.344986	0.621918	0.351968	0.382702	0	0	0	0.704818	0	0	0.714331	0	0.734226	0.870114	0	1.63837
G2W53_000737	0.190652	0	0	0	0	0	0	0	0	0	0	0	0	0	0	0	0	0	0	0	0
G2W53_000738	0	0	0	0	0	0	0	0	0	0.0244594	0.0255756	0	0	0	0	0	0	0	0	0	0
G2W53_000739	0	0	0	0	0	0	0	0	0	0	0	0.0874302	0.113398	0	0	0	0	0	0	0	0
G2W53_000740	0	0	0	0.443759	0.691186	0.434544	0.626695	0.576341	0.795385	0.0140129	0.0293049	0.0194728	0	0	0.0132205	0.319966	1.14027	0.289412	1.12247	1.05222	1.11548
G2W53_000741	0	0	0	0	0	0	0	0	0	0	0	0	0	0	0	0	0	0	0	0	0
G2W53_000742	0	0	0	0.0963706	0.170118	0.13369	0	0	0	0	0	0	0	0	0	0.0727039	0	0.0373644	0	0	0
G2W53_000743	0	0	0	0	0	0	0	0	0	0	0	0	0	0	0	0	0	0	0	0	0
G2W53_000744	35.7285	29.7739	28.9392	123.771	70.5227	113.328	116.917	113.061	118.868	614.344	615.295	882.92	789.67	885.872	789.319	31.5299	59.9892	30.362	59.6297	67.2757	67.1863
G2W53_000745	226.025	218.067	204.381	310.967	404.537	335.617	283.347	359.098	311.574	80.6758	80.5386	80.4623	83.0622	84.5093	84.7286	112.048	102.079	110.026	102.662	116.419	117.469
G2W53_000746	0	0	0	0.108932	0	0	0	0	0	0	0	0.150995	0	0	0	0.0661616	0.11634	0.782051	0.483542	0.0735054	0.151747
G2W53_000747	0	0	0	0	0.066661	0	0	0	0	0	0	0	0	0	0	0.108472	0	0	0	0	0
G2W53_000748	0	0	0	450.552	432.984	473.775	0.152231	1.11999	1.40514	0.0412162	0	0.343652	0.148573	0.179139	0.155542	621.589	531.194	610.036	508.25	554.114	553.92
G2W53_000749	0	0	0	0.0615701	0.130424	0.102496	0.13858	0	0	0.00470985	0.0049248	0	0	0.00682351	0.0177741	0.0129052	0.0151285	0.0221077	0	0	0.00493316
G2W53_000750	0	0	0	0.242762	0.257121	0	0	0	0	0	0	0	0	0	0	1.25518	0.490474	0	0.509638	1.3945	0.959617
G2W53_000751	0	0	0	0	0	0	0	0	0	0	0	0	0	0	0	0	0	0	0	0	0
G2W53_000752	0.0868099	0	0	0.0979443	0	0.040762	0	0	0	0	0	0	0	0	0	0.0789954	0.0926047	0	0.096223	0.0658228	0.0905909
G2W53_000753	9.65776	10.2731	9.75928	12.3234	8.79315	10.3654	10.7055	9.14311	10.0613	4.97001	5.10118	5.59298	5.00097	5.03588	4.54514	1.33674	3.232	1.74609	3.42613	4.17688	4.53499
G2W53_000754	0	0	0	0	0	0	0	0	0	0	0	0	0	0	0	0	0	0	0	0	0
G2W53_000755	0	0	0	2.51206	2.29546	2.25491	0	0	0	0	0	0	0.0309838	0	0.0324371	0.879255	0.773049	0.806914	0.918005	0.767524	0.900284
G2W53_000756	0.537911	0.590942	0.535072	0.606905	0.964204	1.01032	0.113833	0	0	0.205699	0.286783	0.190564	0	0.198675	0	0.250499	0.440483	0.257476	0.305129	0.417456	0.574539
G2W53_000757	0.215164	0.630338	0.142686	0.606905	0.899924	0.505158	0	0	0	0.256188	0.40182	0.356007	0	0.371159	0	0.233988	0.41145	0.481011	0.142509	0.649901	0.402502
G2W53_000758	0	0	0	0.201105	0	0.334779	0	0.0853887	0	0.042248	0	0.0195697	0	0.0204026	0	0.038587	0	0.0661029	0.0470022	0.15719	0.0737518
G2W53_000759	0	0	0	0	0	0	0	0	0	0	0	0	0	0	0	0	0	0	0	0	0
G2W53_000760	3.20458	2.5817	1.27507	0.18078	1.72326	0.300945	1.62757	2.30277	1.16846	0	0	0	0	0	0	0	0	0	0	0	0
G2W53_000761	0.118595	0.0868576	0	0	0	0	0	0	0	0	0	0	0	0	0	0	0	0	0	0	0
G2W53_000762	0	0.149066	0.134973	0	0	0	0	0	0	0	0	0	0	0	0	0	0	0	0	0	0
G2W53_000763	0	0	0	0	0	0	0	0	0	0	0	0	0	0	0	0	0	0	0	0	0
G2W53_000764	0	0	0	0	0	0	0	0	0	0	0	0	0	0	0	0	0	0	0	0	0
G2W53_000765	0	0	0	0	0	0	0	0	0	0	0	0	0	0	0	0	0	0	0	0	0
G2W53_000766	0	0	0	0	0	0.32894	0	0	0	0	0	0	0	0	0	0	0	0	0	0	0
G2W53_000767	0	0	0	0	0	0	0	0	0	0	0	0	0	0	0	0	0	0	0	0	0
G2W53_000768	0	0	0	0	0	0	0	0	0	0	0	0	0	0	0	0	0	0	0	0	0
G2W53_000769	0.45641	1.00281	0.100889	0	0.0909014	0.142873	0	0	0	0	0	0	0.344291	0	0.36044	0.558301	0.327243	0.430388	0.255022	0.387669	0.400158
G2W53_000770	0.161952	0	0	0	0	0	0	0	0	0	0	0	0	0	0	0	0	0	0	0	0
G2W53_000771	0	0	0	0	0	0	0	0	0	0	0	0	0	0	0	0	0	0	0	0	0
G2W53_000772	0	0	0	0	0	0	0	0	0	0	0	0	0	0	0	0	0	0	0	0	0
G2W53_000773	8.55832	11.1752	7.99041	23.5048	21.3627	24.561	13.1783	13.4057	13.1685	11.9598	11.7642	17.7365	10.8632	17.738	10.9713	40.7579	46.4637	39.4967	46.5962	50.4625	51.593
G2W53_000774	0.191257	0.210113	0.15854	0.566445	0.514242	0.493932	0	0	0.024906	0	0	0	0	0	0.00660882	0.0639792	0.120002	0.0657612	0.109105	0.135053	0.117393
G2W53_000775	0	0	0	0	0	0	0	0	0.216923	0	0	0	0	0	0	0	0	0	0	0	0
G2W53_000776	0	0	0	0	0.143988	0	0	0	0.125526	0	0	0	0	0	0	0	0	0.041985	0	0	0
G2W53_000777	26.0964	26.6907	27.6825	1.09263	1.24863	0.957321	0.258869	0.390679	0.424793	9.55555	9.43922	9.35255	15.0077	9.91699	15.1482	0.356654	0.393504	0.366587	0.434434	0.466166	0.433065
G2W53_000778	0	0	0	0	0	0	0	0	0	0	0	0	0	0	0	0	0	0	0	0	0
G2W53_000779	1.871	5.07011	1.36482	0.527744	0.223584	0.263561	0.554318	0.179263	0.682208	0.421616	0.514334	0.878837	0.823231	0.610827	0.795549	0.256721	0.376185	0.461774	0.703591	0.285216	0.368005
G2W53_000780	79.0729	81.3304	77.4071	60.6258	61.5563	55.4183	65.6538	69.6104	74.8206	28.0836	28.7651	25.4954	20.4614	25.7797	20.5787	14.4949	17.1173	14.4596	16.8873	20.5369	20.5305
G2W53_000781	7.86795	4.93921	7.75189	2.91677	2.14907	2.74444	11.3222	9.69226	8.66506	4.28598	4.50214	4.45329	2.05525	4.47193	2.05891	0.7901	0.715713	0.756735	0.612441	0.977548	0.988446
G2W53_000782	3.55739	6.3454	1.78833	1.65078	1.85127	2.07451	0.679964	1.29189	1.13571	13.6656	13.4119	44.6436	31.3282	43.9385	29.744	5.09111	5.58316	4.78276	5.8013	5.77784	6.21509
G2W53_000783	0	0	0	0	0	0	0	0	0	0.0715527	0.0748182	0.11048	0.121799	0.0806274	0.0750073	0.00726138	0	0	0.0176899	0.00806737	0.0249818
G2W53_000784	0	0	0	0	0	0	0	0	0	0	0	0	0	0	0	0	0	0	0	0	0
G2W53_000785	0	0	0	0	0	0	0	0	0	0	0	0	0	0	0	0	0	0	0	0	0
G2W53_000786	245.092	228.535	256.582	89.0321	76.1706	87.8781	23.4551	32.8661	35.2855	203.419	204.798	164.529	145.938	164.424	147.188	23.1815	38.2779	22.4135	37.3384	43.633	44.0143
G2W53_000787	0	0	0	0	0	0	0	0	0	0	0	0	0	0.0362095	0	0	0	0	0	0	0
G2W53_000788	37.1611	30.7216	44.0593	1.58816	2.18673	1.05753	0.119153	0	0	52.4448	52.018	75.7941	134.225	78.1516	139.107	0	0.320871	0	0.333408	0.608194	0.627787
G2W53_000789	0	0	0	0	0	0	0	0	0	0	0	0	0	0	0	0	0	0	0	0	0.0242444
G2W53_000790	0	0	0	0	0	0	0	0	0	0	0	0	0	0	0	0	0	0.0804184	0	0	0
G2W53_000791	0	0	0	0	0.0627125	0	0	0	0	0	0	0	0	0	0	0	0	0	0	0	0
G2W53_000792	48.1633	47.8109	47.4083	17.4667	20.5052	18.1632	10.0503	10.9336	10.0963	23.9202	24.2582	19.844	16.6443	20.7538	17	5.51327	5.35376	5.3708	5.51283	8.06793	8.77608
G2W53_000793	0	0	0	0.13929	0	0	0	0	0	0	0	0	0	0	0	0	0	0	0	0	0
G2W53_000794	0	0	0	0	0	0	0	0	0	0	0	0	0	0	0	0	0	0	0	0	0
G2W53_000795	0	0	0	1.58303	2.25836	2.52771	0.339336	0.384087	0.865081	0	0	0	0	0	0	0.584798	0.411328	0.627801	0.4274	0.28876	0.283159
G2W53_000796	0	0	0	0	0	0	0	0	0	0	0	0	0	0	0	0	0	0	0	0	0
G2W53_000797	5.15567	10.9885	4.53302	0.196077	0.173062	0.408012	0.0980717	1.24881	0.543143	0.772322	0.760979	1.23836	0.870004	1.20499	0.840749	0.176349	0.0477071	0.195204	0.0495711	0.0602842	0.0622262
G2W53_000798	0	0	0	0	0	0	0	0	0	0	0	0	0	0	0	0	0	0	0	0	0
G2W53_000799	0	0	0	0	0	0	0	0	0	0	0	0	0	0	0	0	0	0	0	0	0
G2W53_000800	0	0	0	0	0	0	0	0	0	0	0	0	0	0	0	0	0	0	0	0	0
G2W53_000801	0	0	0	0	0	0	0	0	0.0429885	0	0	0	0	0	0	0	0	0	0	0	0
G2W53_000802	10.0624	12.0636	10.4555	10.4853	13.901	13.2416	3.96043	5.00469	4.00616	2.40723	2.7442	3.0685	4.04511	3.27776	3.96163	4.59564	6.33695	4.68965	6.44359	8.88913	8.77738
G2W53_000803	0	0.0832522	0	0.0641258	0.203756	0.160125	0	0	0.118421	0	0	0	0	0	0	0.145201	0.0567387	0.149245	0.0589556	0.0179242	0.0555048
G2W53_000804	0	0	0	0	0	0	0	0	0	0	0	0.428464	0.13893	0.4467	0.145447	0.140806	0	0	0	0	0.161474
G2W53_000805	14.5422	19.7796	15.8431	8.78966	5.89605	9.99864	10.771	9.9522	14.0676	33.7248	29.483	19.9753	25.9081	12.0147	24.5153	5.04958	4.73561	5.19022	5.53573	8.97611	6.94895
G2W53_000806	23.6568	33.3815	26.8787	12.011	5.46551	4.73949	17.0881	19.1906	34.9962	15.258	15.5846	6.87868	11.3972	6.30456	10.8541	2.21085	7.30927	2.40009	7.08047	7.14796	7.49217
G2W53_000807	14.9213	20.665	17.0001	9.46184	6.73686	7.00636	10.5888	10.561	12.7396	14.5973	15.2218	11.6666	12.5259	12.2498	12.9817	3.7338	8.60465	4.19349	8.16436	9.65224	9.04415
G2W53_000808	0	0	0	0	0	0	0	0	0	0	0	0	0	0	0	0	0	0	0	0	0
G2W53_000809	0	0	0	0	0	0	0	0	0	0	0	0	0	0	0	0	0	0	0	0	0
G2W53_000810	0	0	0	0	0	0	0	0	0	0	0	0	0	0	0	0	0	0	0	0	0
G2W53_000811	159.58	130.532	165.991	70.401	55.7096	83.1826	90.6112	92.9405	80.8823	35.4277	35.9345	27.4737	47.7108	27.6818	47.0694	31.3882	34.5226	32.1378	35.1334	43.22	43.5004
G2W53_000812	0	0	0	0	0	0.0444793	0.0400922	0	0.0493421	0	0	0	0	0	0	0	0	0	0	0	0
G2W53_000813	0	0	0	0	0	0	0	0	0	0	0	0	0	0	0	0	0	0	0	0	0
G2W53_000814	0.0596496	0	0	0	0	0	0	0	0	0	0	0	0	0	0	0	0	0	0	0	0
G2W53_000815	0	0	0	0	0	0	0	0	0	0	0	0	0	0	0	0	0	0	0	0	0
G2W53_000816	0.0284986	0	0	0	0	0	0	0	0	0	0	0	0	0	0	0	0	0	0	0	0
G2W53_000817	0	0	0	0.833636	1.49421	1.33438	1.97254	0.816832	1.18421	0	0	0	0	0	0	0.585751	0.595109	0.622134	0.38053	0.976152	1.0076
G2W53_000818	0	0	0	0.0555338	0.235274	0.184894	0.249987	0.282955	0.35894	0	0	0	0	0	0	0.0786771	0.0230579	0.101086	0	0.109263	0.112782
G2W53_000819	162.363	108.985	176.388	4.24834	7.19939	4.95054	35.5706	19.4814	20.398	10.6887	11.4144	4.42442	7.78798	4.61273	8.15328	7.8931	8.52242	8.11294	7.84337	6.69229	5.71687
G2W53_000820	0	0	0	0.198753	0	0	0.0745574	0	0.183518	0	0	0	0	0	0	0	0	0	0	0	0
G2W53_000821	0	0	0	0	0	0	0	0	0	0	0	0	0	0	0	0	0	0	0	0	0
G2W53_000822	0	0	0	0	0	0	0	0	0	0	0	0	0	0	0	0	0	0	0	0	0
G2W53_000823	89.7605	109.195	66.7885	76.5559	62.9038	65.5786	61.5573	65.011	74.6501	16.6032	17.1374	9.1101	16.9532	8.98164	16.2694	13.9929	28.611	13.7806	28.3019	53.363	53.8878
G2W53_000824	0.19949	0	0	0	0	0	0	0	0	0	0	0	0	0	0	0	0	0	0	0	0
G2W53_000825	4.30329	4.20225	3.80496	3.23683	6.85656	4.37803	0.607111	0	0.37359	0.615343	0.428951	0	0.554537	0	0.774063	0.18734	2.63538	0.770233	1.36918	1.24881	1.71872
G2W53_000826	0	0	0	0	0	0	0	0	0	0	0	0	0	0	0	0	0	0	0	0	0
G2W53_000827	0	0	0	0	0	0	0	0	0	0	0	0	0	0	0.0386702	0	0	0	0	0	0
G2W53_000828	0	0	0	0.271893	0	0.113155	0	0	0.125526	0	0	0	0	0	0	0	0	0	0	0	0
G2W53_000829	0	0	0	0	0	0	0	0	0	0	0	0	0	0	0	0	0.00685521	0	0.00712307	0	0
G2W53_000830	0	0	0	0	0	0	0	0	0	0	0	0	0	0	0	0	0	0	0	0	0
G2W53_000831	0	0	0	0.0628607	0.0665788	0.296492	0	0	0	0	0	0	0	0	0	0.166229	0.328839	0.128145	0.329032	0.0577126	0.0595718
G2W53_000832	0	0	0	0	0	0	0.100388	0	0	0	0	0	0	0	0	0	0	0	0	0	0
G2W53_000833	0	0	0	0	0	0	0	0	0	0	0	0	0	0	0	0	0	0	0	0	0
G2W53_000834	0	0	0	0	0	0	0	0	0	0	0	0	0	0	0	0	0	0	0	0	0
G2W53_000835	11.9685	10.6369	18.1925	6.29664	6.26733	6.12504	11.2126	19.971	19.3333	30.8264	30.8779	11.6687	6.3991	10.6957	6.2739	2.62507	3.31867	2.64528	3.26025	2.23022	2.12499
G2W53_000836	0	0	0	0	0	0.0149045	0.026869	0	0.016534	0	0	0	0	0	0	0	0	0	0	0	0
G2W53_000837	2.04539	1.77039	1.97294	5.13996	4.88848	3.57976	6.84686	4.98839	5.32712	0.342252	0.317358	0.242289	0.343348	0.252601	0.365546	0.106164	0.483988	0.109121	0.481346	0.445582	0.432881
G2W53_000838	8.60658	9.18101	11.4149	12.0326	12.6325	10.9817	12.0366	11.3832	9.06362	3.77639	3.39453	4.32713	3.52263	3.93539	3.56285	3.1466	10.3567	3.29643	9.36092	13.7818	13.74
G2W53_000839	2.36259	1.29775	1.95843	0	0.352911	0.277341	0.74996	2.26364	2.15364	0.0140981	0	0	0.0698775	0	0.0266019	0.0193147	0.0301897	0	0.0156846	0.0858344	0.0885995
G2W53_000840	0.194971	0.142795	0.323237	0	0	0.0915496	0.16504	0.140104	0	0.0415007	0.0216974	0	0.0560996	0	0.0783079	0	0	0	0	0.0842236	0.0217342
G2W53_000841	0	0.167452	0.227431	0.0322454	0.0683054	0.0268395	0.0725768	0.109531	0.148869	0.0380382	0.0198871	0.0528592	0.0856985	0	0.0717745	0	0.0203637	0	0.0423187	0.0964958	0.0796835
G2W53_000842	7.97683	6.07277	6.61227	3.07893	2.57121	2.4149	3.06517	3.67052	4.86578	9.27435	10.6484	4.92774	5.57192	5.40093	5.91906	2.32529	3.21265	2.39005	3.84396	2.76792	2.85708
G2W53_000843	1.91983	1.57345	1.50048	0.876743	0.546236	0.482928	0.938304	1.57665	2.82148	1.21499	1.18503	1.26275	0.745287	1.09461	0.645388	0.167855	0.524727	0.17253	0.465717	0.569819	0.609563
G2W53_000844	0.128183	0.657161	0.850044	0.723121	0.689303	0.481512	0.0542524	0.122814	0.133539	0.705614	0.163959	0.653696	0.423925	0.454345	0.443809	0.429646	0.839442	0.368011	0.872242	0.238668	0.328475
G2W53_000845	0	0	0	0	0	0	0	0	0	0	0	0	0	0	0	0	0	0	0	0	0
G2W53_000846	0	0	0	0	0	0	0	0	0	0	0	0	0	0	0	0	0	0	0	0	0
G2W53_000847	0	0	0	0	0	0	0	0	0	0	0	0	0	0	0	0	0	0	0	0	0
G2W53_000848	0.105325	0	0	0	0	0	0	0	0	0	0.00562421	0	0	0	0	0	0	0	0	0	0
G2W53_000849	0	0	0	0	0	0	0	0	0	0	0	0	0	0	0	0	0	0	0	0	0
G2W53_000850	0	0	0	0	0	0	0	0	0	0	0	0	0	0	0	0	0	0	0	0	0
G2W53_000851	0	0	0	0	0	0	0	0	0	0	0	0	0	0	0	0	0	0	0	0	0
G2W53_000852	4.27932	4.24029	3.28297	4.21283	4.66256	4.25514	2.45043	3.21575	3.23431	4.84019	5.06108	3.36304	2.18095	3.88183	2.03861	6.78903	9.80948	6.65355	9.13503	8.85816	9.6867
G2W53_000853	0	0	0	0	0	0	0	0	0.326891	0	0	0	0	0	0	0	0	0	0	0	0
G2W53_000854	0.658427	0.482226	0.545793	0.18572	0.295057	0.695627	0.0696684	0	0	0.0664126	0.0347218	0.230723	0.0598499	0.240542	0.0626572	0.121315	0.106662	0.0623471	0.110829	0.0336953	0.0347807
G2W53_000855	0	0	0	0	0	0	0	0	0	0	0	0	0	0	0	0	0	0	0	0	0
G2W53_000856	0	0	0	0	0	0	0	0	0	0	0	0	0	0	0	0	0	0	0	0	0
G2W53_000857	0	0	0	0	0	0	0	0	0	0	0	0	0	0	0	0	0	0	0	0	0
G2W53_000858	2.64127	3.86888	3.83673	2.66075	4.39629	4.01595	2.12932	1.98836	2.26026	6.89524	5.94994	3.349	1.74954	3.58852	1.64212	6.78689	6.45091	6.78738	5.95819	6.52126	7.01181
G2W53_000859	0	0	0	0	0	0	0	0	0	0	0	0	0	0	0	0	0	0	0	0	0
G2W53_000860	0	0	0	0	0.479959	0.754369	0.339982	0.769637	0.627631	0	0	0	0	0	0	0	1.37333	0	1.42699	0.86769	0.895642
G2W53_000861	0	0	0	0.779511	0.660495	0.519061	0.818764	0.397175	0.431856	0	0	0	0	0.0599442	0	0	0.0443009	0.155372	0.0460319	0	0
G2W53_000862	0	0	0	0	0	0	0	0	0	0	0	0	0	0	0	0	0	0	0	0	0
G2W53_000863	0	0	0	0	0	0	0	0	0	0	0	0	0	0	0	0	0	0	0	0	0
G2W53_000864	1.46228	2.35612	2.52125	0.659936	0.349485	0.274649	7.55057	5.60415	5.17948	2.37261	2.25536	0.299733	0.194378	0.312489	0	1.57601	1.61659	1.8224	1.67975	0.437736	0.451837
G2W53_000865	0	0	0	0	0	0	0.0657181	0	0	0	0	0	0	0	0	0	0	0	0	0	0
G2W53_000866	0	0	0	0	0	0	0	0	0	0	0	0	0	0	0	0	0	0	0	0	0
G2W53_000867	0	0	0	0	0	0	0	0	0	0	0	0	0	0	0	0	0	0	0	0	0
G2W53_000868	0	0	0	0	0	0	0	0	0	0	0	0	0	0	0	0	0	0	0	0	0
G2W53_000869	0	0	0	0	0	0	0	0	0	0	0	0	0	0	0	0	0	0	0	0	0
G2W53_000870	105.51	77.9131	116.387	1.92293	2.65241	2.30777	0.0335508	0.0379755	0	16.0206	15.8573	10.6778	6.53914	10.9692	6.59807	0.253582	0.321372	0.2536	0.350625	0.144671	0.125753
G2W53_000871	0.263083	0.0963398	0.261695	0	0	0	0	0	0	1.17829	1.58408	0.935649	0.379233	0.97547	0.317616	0	0	0	0	0	0
G2W53_000872	5.5328	3.60193	8.56115	0	0	0	0	0	0	24.8677	26.6869	23.6442	5.30771	22.7543	3.08704	0	0	0	0	0	0
G2W53_000873	0	0	0	0	0	0	0	0	0	2.55848	2.67524	1.42214	0	0	0	0	0	0	0	0	0
G2W53_000874	0	0	0	0	0	0	0	0	0.150873	0	0	0	0	0	0	0	0	0	0	0	0
G2W53_000875	1.11006	1.47818	1.1042	0.967795	1.38682	0.75816	0.234912	0.193376	0.157696	0.751405	0.707128	0.313253	0.829513	0.408232	0.815253	0.291675	0.502829	0.387974	0.501577	0.629037	0.629625
G2W53_000876	0	0	0	0	0	0	0	0	0	0	0	0	0	0	0	0	0	0	0	0	0
G2W53_000877	0	0	0	0	0	0	0	0	0	0	0	0	0	0	0	0	0	0	0	0	0
G2W53_000878	0.432388	1.26671	0.477895	0	0	0	0	0	0	0	0	0	0.0227182	0	0.0237838	0	0	0	0	0	0
G2W53_000879	0	0	0	0	0	0	0	0	0	0	0	0	0	0	0	0	0	0	0	0	0
G2W53_000880	0	0	0	0	0	0	0	0	0	0	0	0	0	0	0	0	0	0	0	0	0
G2W53_000881	3.53589	3.16236	3.85542	2.03306	2.11269	1.77204	0.287795	0.276887	0.371903	0.533568	0.535602	0.385561	0.237215	0.391663	0.248342	0.597794	0.639844	0.587729	0.656929	0.656928	0.648284
G2W53_000882	0	0	0	0	0	0	0	0	0	0	0	0	0	0	0	0	0	0	0	0	0
G2W53_000883	0	0	0	0	0	0	0	0	0	0	0	0	0	0	0	0	0	0	0	0	0
G2W53_000884	0	0	0	0	0	0	0	0	0	0	0	0	0	0	0	0	0	0	0	0	0
G2W53_000885	0	0	0	0	0	0	0	0	0	0	0	0	0	0	0	0	0	0	0	0	0
G2W53_000886	0	0	0	0	0	0	0	0	0	0	0	0	0	0	0	0	0	0	0	0	0
G2W53_000887	0	0	0	0	0	0	0	0	0	0	0	0	0	0	0	0	0	0	0	0	0
G2W53_000888	0	0	0	0	0	0	0	0	0	0	0	0	0	0	0	0	0	0	0	0	0
G2W53_000889	0	0	0	0	0	0	0	0	0	0	0	0	0	0	0	0	0	0	0	0	0
G2W53_000890	0	0	0	0	0	0	0	0	0	0	0	0	0	0	0	0	0	0	0	0	0
G2W53_000891	1.93357	2.0124	1.21476	0	0	0.143356	11.1557	6.77658	9.0116	1.43714	1.50273	0.374456	0.0809454	0.520524	0	0.082038	0.0961714	0.0843229	0.199858	0	0
G2W53_000892	0	0	0	0	0	0	0	0	0	0	0	0	0	0	0	0	0	0	0	0	0
G2W53_000893	0	0	0	0	0	0	0	0	0	0	0	0	0	0	0	0	0	0	0	0	0
G2W53_000894	0	0	0	0	0	0	0	0	0	0	0	0	0	0	0	0	0	0	0	0.0690836	0
G2W53_000895	0	0	0	0	0	0	0	0	0	0.0457762	0	0	0	0	0.0431877	0	0	0	0	0.0464502	0.0239733
G2W53_000896	0	0	0	0	0	0	1.66295	0.627421	0.682208	0	0	0	0	0	0	0	0	0	0	0	0
G2W53_000897	0	0	0	0	0	0	0	0	0	0	0	0	0	0	0	0	0	0	0	0	0
G2W53_000898	16.0356	20.4154	24.7464	11.4134	9.84991	10.5555	8.49955	9.83585	7.57217	14.1003	15.8122	11.9979	10.4049	12.3605	10.1218	4.94607	7.16566	4.93994	6.7636	7.46499	8.24057
G2W53_000899	0.175134	0.128266	0.11614	0.0987985	0	0.082235	0	0.167799	0.182451	0.11703	0.122371	0	0	0	0.110412	0	0.626518	0	0.781198	0.118753	0
G2W53_000900	0.73599	1.19357	0.871554	0.474509	0.565397	0.345588	0.489503	0.428136	1.01319	0.644188	0.74843	0.795719	0.258014	0.725887	0.30388	0.32687	1.37946	0.369572	1.23428	1.37998	1.42443
G2W53_000901	0	0	0	0	0	0	0.0339078	0	0	0	0	0.0508485	0.0329755	0.0530127	0.0345222	0	0	0	0	0	0
G2W53_000902	0	0	0	0	0	0	0.0873241	0	0.0537356	0	0	0	0	0	0	0	0	0	0	0	0
G2W53_000903	0	0	0	0	0	0.642928	0	0.32797	0	0.728778	0.762038	0	0	0	0	0	0.7803	0	0.810788	3.69754	0
G2W53_000904	0	0	0	0	0.108425	0	0	0	0.0945228	0	0	0	0	0	0	0	0	0	0	0.130154	0.134346
G2W53_000905	0.25528	0	0	0.576046	0	0.719208	0.324135	0.61147	0.531891	0	0	0	0	0	0	0.341214	1.2	0.350718	0.831255	0.758176	0.3913
G2W53_000906	0	0	0	0	0	0	0	0	0	0	0	0	0	0	0	0.12921	0	0.132809	0	0.287103	0.148176
G2W53_000907	0	0	0	0	0	0	0	0	0	0	0	0	0	0	0	0	0	0	0	0	0
G2W53_000908	6.25411	5.4209	5.82158	2.13631	2.33123	2.72112	0.145707	0.384818	0.0896616	2.18895	2.21858	1.26743	0.79598	1.15446	0.797084	0.710267	0.431735	0.693998	0.437923	0.808589	0.75419
G2W53_000909	0.196668	0.672177	0.369524	1.27589	0.470036	0.631035	1.69251	2.08845	3.36353	0.186376	0.224864	0.139458	0.271318	0.166164	0.284044	0.54996	2.05692	0.67295	2.34464	2.13851	1.84701
G2W53_000910	0	0	0	0	0	0	0	0	0	0	0	0	0	0	0	0	0	0	0	0	0
G2W53_000911	0	0	0	0	0	0	0	0	0	0	0	0	0	0	0	0	0	0	0	0	0.0225514
G2W53_000912	0	0	0	0	0	0	0	0	0	0	0	0	0	0	0	0	0	0	0.232156	0.423493	0
G2W53_000913	0	0	0	0	0	0	0	0	0	0.148684	0	0	0	0	0	0	0	0	0	0	0
G2W53_000914	0	0	0	0	0	0	0	0	0	0	0	0	0.0330383	0	0	0	0	0	0	0	0
G2W53_000915	0	0	0	0	0	0.231876	0	0	0	0	0	0	0	0	0	0	0	0	0	0	0
G2W53_000916	48.3718	51.8743	54.0154	1.88031	2.43963	1.70202	0.0176339	0.0199595	0.0217023	11.1113	10.9638	15.8755	20.6753	15.7123	20.6411	0.671798	1.25671	0.602359	1.20134	1.85798	1.63917
G2W53_000917	0	0	0	0	0	0	0	0	0	0	0	0	0	0	0	0	0	0	0	0	0
G2W53_000918	0	0	0	0	0	0	0	0	0	0	0	0	0	0	0	0	0	0	0	0	0
G2W53_000919	0	0	0	0	0	0	0	0	0	0	0	0	0	0	0	0	0	0	0	0	0
G2W53_000920	0	0	0	0	0	0	0	0	0	0	0	0	0	0	0	0	0	0	0	0	0
G2W53_000921	0	0	0	0	0	0	0	0	0	0	0	0	0	0	0	0	0	0	0.914736	0	0
G2W53_000922	0	0	0	0	0	0	0	0	0	0	0	0	0.0463845	0	0.0485601	0	0	0	0	0	0
G2W53_000923	16.5953	16.3162	19.876	32.8803	35.1256	28.5958	17.7511	26.4763	26.7189	3.04921	3.02192	0.865152	0.439918	0.891724	0.460553	2.9756	3.38976	2.91901	3.47499	3.18743	3.21601
G2W53_000924	0.762608	1.39632	0.252861	0	0	0	0	0	0	0	0	0	0.520676	0	0.545098	0	0	0	0	0.879416	0
G2W53_000925	0	0	0	0	0	0	0	0	0	0	0	0	0	0	0	0	0	0	0	0	0
G2W53_000926	19.3648	20.2233	19.5004	8.49667	7.2851	7.91414	27.9271	15.805	20.921	5.40153	6.32043	4.82538	5.91086	2.23589	6.43078	2.11434	3.3048	2.17323	4.14933	2.87103	5.11881
G2W53_000927	26.8238	28.2601	20.5468	11.9763	9.59919	11.4502	29.5663	23.0204	27.4962	3.38054	3.40569	3.38921	3.43599	3.444	3.58259	1.45216	3.33856	1.31871	3.22858	3.49297	3.58932
G2W53_000928	0	0	0	0	0	0	0	0	0	0	0	0	0	0	0	0	0	0	0	0	0
G2W53_000929	3.32198	3.62886	3.80851	2.06461	2.0858	3.17258	0.45278	0.917091	0.645229	0.0684793	0.102292	0.142741	0.141057	0.170076	0.21228	0.254648	0.324705	0.238781	0.342834	0.451669	0.512329
G2W53_000930	0	0	0	0	0	0	0	0	0	0	0	0	0	0	0	0	0	0	0	0.0744585	0.0768572
G2W53_000931	0	0	0.0610888	0	0.0550412	0.0432551	0	0	0	0.197804	0.206831	0.3665	0.0594192	0.477623	0.124412	0.0602212	0.211788	0.0618984	0.293418	0.401433	0.690608
G2W53_000932	0.0683062	0.15008	0.135891	0.115601	0.0408129	0.224515	0.02891	0.130891	0.07116	0.109524	0.152697	0.304397	0.0658008	0.317352	0.0344436	0.133378	0.273623	0.137093	0.324931	0.259319	0.229434
G2W53_000933	0.0825288	0.0604433	0.109458	0.139671	0.246554	0.465022	0.0349296	0.0395361	0	0.112146	0.140717	0.529861	0.161702	0.519917	0.105804	0.143399	0.144089	0.168449	0.174672	0.341391	0.375882
G2W53_000934	0	0	0	0	0	0	0.107363	0	0	0	0.0662641	0	0	0	0	0.231522	0	0	0	0.12861	0.0663766
G2W53_000935	0	0	0	0	0	0	0	0	0	0	0	0	0	0	0	0	0	0	0	0	0
G2W53_000936	0	0	0	0	0	0	0	0	0	0	0	0	0.0187484	0	0.0196278	0	0	0	0	0	0
G2W53_000937	0	0	0	0	0	0	0	0	0	0	0	0	0	0	0	0.204808	0.120046	0.210512	0.124737	0.568853	0.117436
G2W53_000938	0	0	0	0	0	0	0.0980717	0	0	0.637922	0.133407	0.177295	0.114977	0.369682	0.12037	0	0.273208	0.239549	0.141942	0.388389	0
G2W53_000939	1.54477	0	0	0.435727	0.461499	1.08803	0.653811	0.370018	0	0	0.0409342	0.0544008	0.0235194	0.0189054	0.0246226	0.0238369	0.0558869	0.0490015	0.101623	0.0132413	0.0820074
G2W53_000940	0	0	0	0	0	0	0	0	0	0	0	0	0	0	0	0	0	0	0	0	0
G2W53_000941	0	0	0	0	0	0	0	0	0	0	0	0	0	0	0	0	0	0	0	0	0
G2W53_000942	0	0	0	0	0	0	0	0	0	0	0	0	0	0	0	0	0	0	0	0	0
G2W53_000943	0	0	0	0	0	0	0	0	0	0	0	0	0	0	0	0	0	0	0	0	0
G2W53_000944	0	0	0	0	0	0	0	0	0	0	0	0	0	0	0	0	0	0	0	0	0
G2W53_000945	0.590648	0.216292	0.195843	0	0	0	0	0	0	0	0.00987425	0.019684	0.00425506	0.0205218	0.00890929	0	0	0	0	0	0
G2W53_000946	0	0	0	0	0	0	0	0	0	0	0	0	0	0	0	0	0	0	0	0	0
G2W53_000947	0	0	0	0	0	0	0	0	0	0	0	0	0	0	0	0	0	0	0	0	0
G2W53_000948	0	0.355836	0	0	0	0	0	0	0	0	0	0	0	0	0	0	0	0	0	0	0
G2W53_000949	0	0	0	0	0	0	0	0	0	0	0	0	0	0	0	0	0	0	0	0	0
G2W53_000950	0	0	0	0	0	0	0	0	0	0	0	0	0	0	0	0	0	0	0	0	0
G2W53_000951	0	0	0	0	0	0	0	0	0	0	0	0	0	0	0	0	0	0	0	0	0
G2W53_000952	0	0	0	0	0	0	0	0	0	0	0	0	0	0	0	0	0	0	0	0	0
G2W53_000953	0.684614	0	0.227	0	0	0	5.65027	4.09963	2.13965	1.09317	0.381019	0	0	0	0	0	0	0	0	0	0
G2W53_000954	0.218283	0	0.868523	0.12314	0	0	9.14625	3.45082	4.66175	0.497151	0.675792	0.138171	0.224012	0.072026	0.234519	0	0	0	0	0	0
G2W53_000955	0	0	0	0	0	0	0	0	0	0	0	0	0	0	0	0	0	0	0	0	0
G2W53_000956	0	0	0	0	0	0	0	0	0	0	0	0	0	0	0	0	0	0	0	0	0
G2W53_000957	0	0	0	0	0	0	0	0	0	0	0	0	0	0	0	0	0	0	0	0	0
G2W53_000958	0.407068	0	0	0	0	0	0	0	0	0	0	0	0	0	0	0	0	0	0	0	0
G2W53_000959	2.40984	3.52989	2.07751	3.39867	5.32755	5.88408	2.54986	3.34792	3.38921	0.0689173	0.0617679	0.0136814	3.71755	0.0285273	3.84548	0.179844	0.54815	0.249551	0.536709	4.24587	4.24859
G2W53_000960	6.23235	7.86111	5.96985	5.07847	5.17198	4.7148	3.22397	2.98566	6.13203	14.0515	14.1277	4.13059	3.16574	3.13192	4.07905	3.94888	2.89325	3.80519	3.30692	8.7744	9.05706
G2W53_000961	6.29496	7.95895	7.41741	6.66127	6.21593	6.21657	2.81012	3.73306	5.01166	3.33735	3.24844	1.93059	1.76711	1.93106	1.7315	1.27592	2.14342	1.28739	2.12736	2.3747	2.42704
G2W53_000962	0.150615	0	0	0	0	0	0.0637466	0	0	0	0	0	0	0	0	0	0	0	0	0	0
G2W53_000963	0	0	0	0	0.211747	0	0	0.169773	0	0.272518	0.284955	0	0	0	0	0	0.875351	0	0.909553	0.27653	0.285438
G2W53_000964	214.627	186.491	207.563	181.351	231.168	217.691	157.972	167.531	151.514	12.8997	12.7864	12.4407	14.6138	11.9679	14.2819	8.00948	9.06257	7.79323	9.80148	11.727	10.6983
G2W53_000965	0	0	0	0	0	0	0	0	0	0	0	0	0	0	0	0	0	0	0	0	0
G2W53_000966	0	0	0	0	0	0	0	0	0	0	0	0	0	0	0	0	0	0	0	0	0
G2W53_000967	0	0	0	0	0	0	0	0	0	0.00389879	0.00407672	0.00541788	0	0.00564847	0.00735664	0	0	0	0	0	0
G2W53_000968	0	0	0	0	0	0	0	0	0	0	0	0	0	0	0	0	0	0	0	0	0
G2W53_000969	0	0	0	0	0	0	0	0	0	0	0.0170403	0	0.0587448	0	0	0	0	0	0	0	0
G2W53_000970	0	0	0	0	0	0	0	0	0	0	0	0	0	0	0	0	0	0	0	0	0
G2W53_000971	0	0	0	0	0	0	0	0	0	0	0	0	0	0	0	0	0	0	0	0	0
G2W53_000972	1.3097	0	0	0	0	0	0	0	0	0	0	0	0	0	0	0	0	0	0	0	0
G2W53_000973	0	0	0	0	0	0	0	0	0	0	0	0	0	0	0	0	0	0	0	0	0
G2W53_000974	0	0	0	0	0	0	0	0	0	0	0	0	0	0	0	0	0	0	0	0	0
G2W53_000975	0	0	0	0	0	0	0	0	0	0	0	0	0	0	0	0	0	0	0	0	0
G2W53_000976	0	0	0	0	0	0	0	0	0	0	0	0	0	0	0	0	0	0	0	0	0
G2W53_000977	0	0	0	0	0	0	0	0	0	0	0	0	0	0	0	0	0	0	0	0	0
G2W53_000978	0	0	0	0	0	0	0	0	0	0	0	0	0	0	0	0	0	0	0	0	0
G2W53_000979	0	0	0	0	0	0	0	0	0	0	0	0	0	0	0	0	0	0	0	0	0
G2W53_000980	0	0	0	0	0	0	0	0	0	0	0	0	0	0	0	0	0	0	0	0	0
G2W53_000981	0	0	0	0	0	0	0	0	0	0	0	0	0	0	0	0	0	0	0	0	0
G2W53_000982	1.6735	5.28564	2.70509	50.036	73.9937	56.1848	3.3644	4.00853	3.26891	0.488642	0.577587	1.2695	0.65096	1.47742	0.741625	117.959	132.639	116.996	133.662	124.002	123.613
G2W53_000983	0	0	0	0	0	0	0	0	0	0	0	0	0	0	0	0	0	0	0	0	0
G2W53_000984	0	0	0	0	0	0	0	0	0	0	0	0	0	0	0	0	0	0	0	0	0
G2W53_000985	0.669401	0	0	0	0	0	0	0	0	0	0	0	0	0	0	0	0	0	0	0	0
G2W53_000986	0	0	0	0	0	0	0	0	0	0	0	0	0	0	0	0	0	0	0	0	0
G2W53_000987	17.019	19.6326	19.6876	13.4045	14.5547	14.3487	18.5256	16.9313	19.4294	8.12325	7.57072	6.29856	5.47713	6.67323	5.45636	3.9516	5.59352	3.86825	5.46826	7.40663	7.1674
G2W53_000988	0	0	0	0	0	0	0	0	0	0	0	0	0	0	0	0	0	0	0	0	0
G2W53_000989	0.0697292	0	0	0	0	0	0	0	0	0	0	0	0	0	0	0	0	0	0	0	0
G2W53_000990	0	0	0	0	0	0	0	0	0	0	0	0	0	0	0	0	0	0	0	0	0
G2W53_000991	0	0	0	0	0	0	0	0	0	0	0	0	0	0	0	0	0	0	0	0	0
G2W53_000992	0	0	0	0	0	0	0	0	0	0	0	0	0	0	0	0	0	0	0	0	0
G2W53_000993	0	0	0	0	0	0	0	0	0	0	0	0	0	0	0	0	0	0	0	0	0
G2W53_000994	0	0	0	0	0	0	0	0	0	0	0	0	0	0	0	0	0	0	0	0	0
G2W53_000995	0	0	0	0	0	0	0	0	0	0	0	0	0	0	0	0	0	0	0	0	0
G2W53_000996	0.0715511	0	0	0	0	0	0	0	0	0	0	0	0	0	0	0	0	0	0	0	0
G2W53_000997	0	0	0	0	0	0	0	0	0	0	0	0	0	0	0	0	0	0	0	0	0
G2W53_000998	0	0	0	0	0	0	0	0	0	0	0	0	0	0	0	0	0	0	0	0	0
G2W53_000999	0	0	0	0	0	0	0	0	0	0	0	0	0	0	0	0	0	0	0	0	0
G2W53_001000	0	0	0	0	0	0	0	0	0	0	0	0	0	0	0	0	0	0	0	0	0
G2W53_001001	0	0	0	0	0	0	0	0	0	0	0	0	0	0	0	0	0	0	0	0	0
G2W53_001002	0	0	0	0	0	0	0	0.450959	0	0	0	0	0	0	0	0	0	0	0	0	0
G2W53_001003	0	0	0	0	0	0	0	0	0	0	0	0	0	0	0	0	0	0	0	0	0
G2W53_001004	0	0	0	0	0	0	0	0	0	0	0	0	0	0	0	0	0	0	0	0	0
G2W53_001005	11.2961	9.5267	9.53401	6.3725	6.95396	5.78635	19.5586	14.4307	15.6908	0.630811	0.769533	0.657447	2.2739	1.2947	2.57894	2.35261	2.13879	2.22073	2.51477	2.66708	2.80806
G2W53_001006	0	0	0	0.708056	0	0	0.531222	0	1.30757	0	1.39707	0	0	0	0	0	5.7222	0	2.97289	0	1.39944
G2W53_001007	12.9196	10.9562	11.1379	10.242	10.8072	10.2491	12.0298	12.5739	13.7427	3.84518	4.09298	3.6904	3.14113	3.56692	3.21016	2.96876	3.37655	3.0904	3.40076	4.29479	4.50558
G2W53_001008	9.34853	8.87545	10.4472	8.59433	8.68892	9.02316	8.353	8.45937	10.5507	10.5423	10.9086	6.56196	9.00573	5.88664	8.28848	6.21859	7.87782	5.05158	6.35303	9.58322	7.93656
G2W53_001009	0	0	0	0	0	0	0	0	0	0	0	0	0	0	0	0	0	0	0	0	0
G2W53_001010	0	0	0	0	0	0	0	0	0	0	0	0	0	0	0	0	0	0	0	0	0
G2W53_001011	0	0	0	0	0	0	0	0	0	0	0	0	0	0	0	0	0	0	0	0	0
G2W53_001012	0	0	0	0	0	0	0.0215725	0	0	0	0.0189683	0	0	0.0262814	0	0.0165685	0	0.01703	0.0201818	0	0
G2W53_001013	43.9939	45.7805	47.7293	20.5868	19.8481	22.0552	17.2091	17.3111	18.3886	15.5846	15.5758	10.9879	11.9758	11.2893	12.2969	6.52301	11.361	6.68075	11.5778	14.1447	14.1729
G2W53_001014	0.233512	0	0	1.05385	0.837138	1.20611	1.28482	1.00679	0.729804	0	0	0	0	0	0	0.374202	0	0.384625	0	0.166295	0.343304
G2W53_001015	0	0	0	0	0	0	0	0	0	0	0	0	0	0	0	0	0	0	0	0	0
G2W53_001016	0	0	0	0	0	0	0	0	0	0	0	0	0	0	0	0	0	0	0	0	0
G2W53_001017	0	0	0	0	0	0	0	0	0	0	0	0	0	0	0	0	0	0	0	0	0
G2W53_001018	0	0	0	0	0	0	0	0	0	0	0	0	0	0	0	0	0	0	0	0	0
G2W53_001019	8.87362	10.968	8.69142	5.23618	3.94118	3.93461	4.85602	5.57877	6.60311	5.80097	5.91478	3.83629	3.77242	3.99956	3.7536	1.30191	4.14394	1.35511	4.1553	4.42166	4.5641
G2W53_001020	0.257462	0	0.170735	0.290485	0.769166	0.48357	0.980717	0.986714	0.536437	0	0	0	0	0	0	0.0428598	0.0334958	0.0587381	0	0.0634895	0.0655348
G2W53_001021	0	0	0	0	0	0	0	0	0	0	0	0	0	0	0	0	0	0	0	0	0
G2W53_001022	0	0	0	0	0	0	0	0	0	0	0	0	0	0	0	0	0	0	0	0	0
G2W53_001023	0	0	0	0	0	0	0	0	0	0	0	0	0	0	0	0	0	0	0	0	0
G2W53_001024	0	0	0	0	0	0	0	0	0	0	0	0	0	0	0	0	0	0	0	0	0
G2W53_001025	0	0	0	0	0	0	0	0	0	0	0	0	0	0	0	0	0	0	0	0	0
G2W53_001026	0	0	0	0	0	0	0	0	0	0	0	0	0	0	0	0	0	0	0	0	0
G2W53_001027	0	0	0	0	0	0	0	0	0	0	0	0	0	0	0	0	0	0	0	0	0
G2W53_001028	0	0	0	0	0	0	0	0	0	0	0	0	0	0	0	0	0	0	0	0	0
G2W53_001029	0	0	0	0	0	0	0	0	0	0	0	0	0	0	0	0	0	0	0	0	0
G2W53_001030	0	0	0	0	0	0	0	0	0	0	0	0	0	0	0	0	0	0	0	0	0
G2W53_001031	0	0	0	0	0	0	0	0	0	0	0	0	0	0	0	0	0	0	0	0	0
G2W53_001032	0	0	0	0	0	0	0	0	0	0	0	0	0	0	0	0	0	0	0	0	0
G2W53_001033	0	0	0	0	0	0	0	0	0	0	0	0	0	0	0	0	0	0	0	0	0
G2W53_001034	0	0	0	0	0	0	0	0	0	0	0	0	0	0	0	0	0	0	0	0	0
G2W53_001035	0	0	0	0	0	0	0	0	0	0	0	0	0	0	0	0	0	0	0	0	0.0328101
G2W53_001036	106.448	108.222	98.8003	48.3774	48.5635	46.8613	12.2612	14.9507	14.8073	80.504	80.0249	98.6285	119.12	98.6607	119.534	11.5869	14.2654	11.6035	14.8887	19.4148	19.0157
G2W53_001037	0	0	0	0	0	0	0	0	0	0	0	0	0	0	0	0	0	0	0	0	0
G2W53_001038	0	0	0	0	0	0	0	0	0	0	0	0	0	0	0	0	0	0	0	0	0
G2W53_001039	0	0	0	0	0	0	0	0	0	0	0	0	0	0	0	0	0	0	0	0	0
G2W53_001040	0	0	0	0	0	0	0	0	0	0	0	0	0	0	0	0	0	0	0	0	0
G2W53_001041	0	0	0	0	0	0	0	0	0	0	0	0	0	0	0	0	0	0	0	0	0
G2W53_001042	0	0	0	0	0	0	0	0	0	0	0	0	0	0	0	0	0	0	0	0	0
G2W53_001043	0	0.126792	0	2.24625	2.27567	2.3574	1.02581	0.746415	0.901769	0.0458307	0.0479223	0	0.123906	0.0663984	0.0432391	0.293015	0.63792	0.559327	0.560869	2.46479	2.30418
G2W53_001044	0.233512	0.855109	0.361323	0.219552	0.139523	0.0730977	0.065888	0.111866	1.01362	0.637812	0.637924	0.0770717	0.37486	0.20088	0.340117	0	0.326606	0	0.246812	0.140696	0.20332
G2W53_001045	54.4532	48.7906	55.9585	36.8189	38.3045	40.5292	13.6483	19.3334	21.3234	13.2391	13.3939	11.1102	10.5364	11.5415	11.1657	3.92595	4.84776	3.79317	4.3358	6.30995	6.18305
G2W53_001046	0.760387	1.07096	1.0085	0.758926	0.559176	0.411973	0.346583	0.504374	0.761689	0.512426	0.483538	0.364726	0.191474	0.344035	0.16508	0.0684911	0.52189	0.0586656	0.486663	0.393149	0.353451
G2W53_001047	1.28183	0.4694	0.850044	0	0	0	0.271262	0.921108	1.33539	0.155787	0.244346	0.216487	0.0701964	0.225701	0.146978	0	0	0	0	0.158081	0.163174
G2W53_001048	15.8542	19.5073	23.9712	15.0257	17.2406	13.8466	7.7838	11.0888	8.58864	14.7496	12.0106	6.34848	9.99846	10.4008	7.88137	3.09963	4.19266	3.79865	3.77561	5.43042	5.60536
G2W53_001049	48.0956	51.354	54.3885	30.9879	33.577	31.2603	16.392	19.1601	18.0642	15.5862	15.1876	9.70389	9.66607	9.2266	9.80323	3.11244	4.00753	3.19913	3.41831	6.46233	6.2024
G2W53_001050	0	0	0	0	0	0	0	0	0	0	0	0	0	0	0	0	0	0	0	0	0
G2W53_001051	0	0	0	0	0	0	0	0	0	0	0	0	0	0	0	0	0	0	0	0	0
G2W53_001052	0	0	0	0	0	0	0	0	0	0	0	0	0	0	0	0	0	0	0	0	0
G2W53_001053	0	0	0	0	0	0	0	0	0	0	0	0	0	0	0	0	0	0	0	0	0
G2W53_001054	0	0	0	0	0	0	0	0	0	0.0138655	0.0289965	0	0	0	0	0	0	0	0	0	0
G2W53_001055	0	0	0	0	0	0	0	0	0	0	0	0	0	0	0	0	0	0	0	0	0
G2W53_001056	0	0	0	0	0	0	0	0	0	0	0	0	0	0	0	0	0	0	0	0	0
G2W53_001057	0	0	0	0	0	0	0	0	0	0	0	0	0	0	0	0	0	0	0	0	0
G2W53_001058	20.8398	25.1838	20.4786	43.9796	32.318	43.2339	58.7351	64.4389	75.3947	4.23601	4.09041	5.10991	5.11675	4.93876	4.92441	6.57413	9.14275	6.68379	8.97774	9.91236	10.0795
G2W53_001059	0	0	0	0	0	0	1.01995	0	0	0	0	0	0	0	0	0	0	0	0	0	0
G2W53_001060	0	0	0	0	0	0	0	0	0	0	0	0	0	0	0	0	0	0	0	0	0
G2W53_001061	0	0	0	0	0	0	0	0	0	0	0	0	0	0	0	0	0	0	0	0	0
G2W53_001062	0	0	0	0	0	0	0	0	0	0	0	0	0	0	0	0	0	0	0	0	0
G2W53_001063	0	0	0	0	0	0	0	0	0	0	0	0	0	0	0	0	0	0	0	0.0455153	0
G2W53_001064	0	0	0	0	0	0	0	0	0	0	0	0	0	0	0	0	0	0	0	0	0
G2W53_001065	0	0	0	0	0	0	0	0	0	0	0	0	0	0	0	0	0	0	0	0	0
G2W53_001066	0	0	0	0	0	0	0	0	0	0	0	0	0	0	0	0	0	0	0	0	0
G2W53_001067	0	0	0	0	0	0	0	0	0	0	0	0	0	0	0	0	0	0	0	0	0
G2W53_001068	1.97387	1.88563	0.853676	4.35727	4.35861	3.98945	1.7435	1.60341	1.83283	0.106917	0.167695	0.297151	0.192704	0.309798	0.22696	1.31831	1.54542	1.25465	1.78423	0.732317	0.699915
G2W53_001069	0	0	0	0	0	0	0	0	0	0	0	0	0	0	0	0	0	0	0	0	0
G2W53_001070	0	0	0	0	0	0	0	0	0	0	0	0	0	0	0	0	0	0	0	0	0
G2W53_001071	0	0	0	0	0	0	0	0	0	0	0	0	0	0	0	0	0	0	0	0	0
G2W53_001072	0	0	0	0	0	0	0	0	0	0	0	0	0	0	0	0	0	0	0	0	0
G2W53_001073	0	0	0	0	0	0	0	0	0	0	0	0	0	0	0	0	0	0	0	0	0
G2W53_001074	0	0	0	0.0588005	0.871899	0.19577	0	0	0	0	0	0	0	0	0	0.459053	0	0.377471	0	0.204002	0.210574
G2W53_001075	0	0	0	0	0	0	0	0	0	0	0	0	0	0	0	0	0	0	0	0	0
G2W53_001076	0	0	0	0	0	0	0	0	0	0	0	0	0	0	0	0	0	0	0	0	0
G2W53_001077	0	0	0	0	0	0	0	0	0	0	0	0	0	0	0	0	0	0	0.743223	0	0
G2W53_001078	0	0	0	0.253632	0.0895447	0.422221	0.126859	0.215383	0.234191	0	0.0857902	0	0	0	0	0	0.263538	0	0.228196	0.208135	0.257807
G2W53_001079	16.4924	15.8845	17.2793	13.4247	10.7091	16.3722	76.4959	61.5108	67.0389	5.3913	4.94459	5.1097	3.96296	5.19519	4.13322	2.90455	3.46701	2.79886	3.39057	4.08411	4.14628
G2W53_001080	0	0.0614535	0.0556435	0.142006	0	0	0.10654	0.0401969	0.131121	0.49887	0.521637	0.231082	0	0	0	0	0	0	0	0	0
G2W53_001081	73.3824	65.5219	69.5406	26.8316	25.1708	22.3333	18.5009	23.8703	30.0838	13.4067	13.7726	12.8288	13.5126	13.5452	14.4793	3.7057	6.98836	3.5605	6.93432	7.0407	7.23672
G2W53_001082	223.771	239.528	276.097	283.425	375.397	345.023	154.813	205.637	158.589	338.986	356.851	302.373	305.488	283.718	327.38	509.394	413.225	534.333	443.385	446.241	479.808
G2W53_001083	0	0	0	0	0	0	0	0	0	0	0	0	0	0	0	0	0	0	0	0	0
G2W53_001084	0	0	0	0	0	0	0	0	0	0.0536225	0	0	0	0	0	0	0	0	0	0	0
G2W53_001085	0	0	0	0.0431303	0.228407	0.0717991	0.0323587	0.0732522	0.0398243	0	0	0	0	0	0.036087	0.0698709	0.163816	0.071817	0.170217	0.232879	0.200318
G2W53_001086	0	0	0	0	0	0	0	0	0	0	0	0	0	0	0	0	0	0	0	0	0
G2W53_001087	0	0	0	0.0137709	0	0	0.0103317	0	0.0127154	0	0	0	0	0	0	0	0	0	0	0	0
G2W53_001088	0.0373735	0	0	0	0	0.0175489	0.015818	0	0	0	0	0	0	0	0	0	0.00360302	0.00315912	0	0	0
G2W53_001089	0	0	0	1.50747	1.30634	2.05322	1.13099	1.5129	1.51846	0	0	0	0	0	0	0.139909	1.02508	0.179757	0.979918	0.971488	0.762116
G2W53_001090	0	0	0	0	0	0	0	0	0	0	0	0	0	0	0	0	0	0	0	0	0
G2W53_001091	0	0	0	0	0	0	0	0	0	0	0	0	0	0	0	0	0	0	0	0	0
G2W53_001092	0	0	0	0	0	0	0	0	0	0	0	0	0	0	0	0	0	0	0	0	0
G2W53_001093	0	0	0	0	0	0	0	0	0	0	0	0	0	0	0	0	0	0	0	0	0
G2W53_001094	0	0	0	0	0	0	0	0	0	0	0	0	0	0	0	0	0	0	0	0	0
G2W53_001095	0	0	0	0	0	0	0	0	0	0	0	0	0	0	0	0	0	0	0	0	0
G2W53_001096	0	0.0417048	0	0.706717	0.918637	0.374332	0	0	0	0	0	0	0	0	0	0.401296	0.817064	0.412473	1.08053	0.445838	0.460201
G2W53_001097	0	0	0	0	0	0	0	0	0	0	0	0	0	0	0	0	0	0	0	0	0
G2W53_001098	0	0	0	0	0	0	0	0	0	0	0	0	0	0	0	0	0	0	0	0	0
G2W53_001099	0	0	0	0	0	0	0	0	0	0	0	0	0	0	0	0	0	0	0	0	0
G2W53_001100	0	0	0	0	0	0	0	0	0	0	0	0	0	0	0	0	0	0	0	0	0
G2W53_001101	0	0	0	0	0	0	0	0	0	0	0	0	0	0	0	0	0	0	0	0	0
G2W53_001102	0	0	0	0	0	0	0	0	0	0	0	0	0	0	0	0	0	0	0	0	0
G2W53_001103	0	0	0	0	0	0	0	0	0	0	0	0	0	0	0	0	0	0	0	0	0
G2W53_001104	0	0	0	0	0	0	0	0	0	0	0	0	0	0	0	0	0	0	0	0	0
G2W53_001105	0.253135	0	0	0	0	0	0	0	0	0	0	0	0	0	0	0	0	0	0	0	0
G2W53_001106	0	0	0	0	0	0	0	0	0	0	0	0	0	0	0	0	0	0	0	0	0
G2W53_001107	0	0	0	0	0	0	0	0	0	0	0	0	0	0	0	0	0	0	0	0	0
G2W53_001108	0	0	0	0	0	0	0	0	0	0	0	0	0	0	0	0	0	0	0	0	0
G2W53_001109	0	0	0	0	0	0	0	0	0	0	0	0	0	0	0	0	0	0	0	0	0
G2W53_001110	0	0	0	0	0	0	0	0	0	0	0	0	0	0	0	0	0	0	0	0	0
G2W53_001111	0	0	0	0	0	0	0	0	0	0	0	0	0	0	0	0	0	0	0	0	0
G2W53_001112	0	0	0	0	0	0	0	0	0	0	0	0	0	0	0	0	0	0	0	0	0
G2W53_001113	0	0	0	0	0	0	0	0	0	0	0	0	0	0	0	0	0	0	0	0	0
G2W53_001114	0	0	0	0	0	0	0	0	0	0	0	0	0	0	0	0	0	0	0	0	0
G2W53_001115	0	0	0	0	0	0	0	0	0	0	0	0	0	0	0	0	0	0	0	0	0
G2W53_001116	0	0	0	0	0	0	0	0	0	0	0	0	0	0	0	0	0	0	0	0	0
G2W53_001117	0	0	0	0	0	0	0	0	0	0	0	0	0	0	0	0	0	0	0	0	0
G2W53_001118	0	0	0	0	0	0	0	0	0	0	0	0	0	0	0	0	0	0	0	0	0
G2W53_001119	0	0	0	0	0	0	0	0	0	0	0	0	0	0	0	0	0	0	0	0	0
G2W53_001120	0	0	0	0	0	0	0	0	0	0	0	0	0	0	0	0	0	0	0	0	0
G2W53_001121	0	0	0	0	0	0	0	0	0	0	0	0	0	0	0	0	0	0	0	0	0
G2W53_001122	0	0	0	0	0	0	0	0	0	0	0	0	0	0	0	0	0	0	0	0	0
G2W53_001123	0	0	0	0	0	0	0	0	0	0	0	0	0	0	0	0	0	0	0	0	0
G2W53_001124	0	0	0	0	0	0	0	0	0	0	0	0	0	0	0	0	0	0	0	0	0
G2W53_001125	0	0	0	0	0	0	0	0	0	0	0	0	0	0	0	0	0	0	0	0	0
G2W53_001126	0	0	0	0	0	0	0	0	0	0	0	0	0	0	0	0	0	0	0	0	0
G2W53_001127	0	0	0	0	0	0	0	0	0	0	0	0	0	0	0	0	0	0	0	0	0
G2W53_001128	0	0	0	0	0	0	0	0	0	0	0	0	0	0	0	0	0	0	0	0	0
G2W53_001129	0	0	0	0	0	0	0	0	0	0	0	0	0	0	0	0	0	0	0	0	0
G2W53_001130	0	0	0	0	0	0	0	0	0	0	0	0	0	0	0	0	0	0	0	0	0
G2W53_001131	0	0	0	0	0	0	0	0	0	0	0	0	0	0	0	0	0	0	0	0	0
G2W53_001132	0	0	0	0	0	0	0	0	0	0.00890481	0	0	0	0	0	0	0	0	0	0	0
G2W53_001133	0	0	0	0	0	0	0	0	0	0	0	0	0	0	0	0	0	0	0	0	0
G2W53_001134	0	0	0	0	0	0	0	0	0	0	0	0	0	0	0	0	0	0	0	0	0
G2W53_001135	0	0	0	0	0	0	0	0	0	0	0	0	0	0	0	0	0	0	0	0	0
G2W53_001136	0	0	0	0	0	0	0	0	0	0	0	0	0	0	0	0	0	0	0	0	0
G2W53_001137	0	0	0	0	0	0	0	0	0	0	0	0	0	0	0	0	0	0	0	0	0
G2W53_001138	0	0	0	0	0	0	0	0	0	0	0	0	0	0	0	0.0821915	0	0	0	0	0
G2W53_001139	0	0	0	0	0	0	0	0	0	0	0	0	0	0	0	0	0	0	0	0	0
G2W53_001140	0	0	0	0	0	0	0.0179821	0	0	0	0	0	0	0	0	0	0	0	0	0	0
G2W53_001141	0	0	0	0	0	0	0	0	0	0	0	0	0	0	0	0	0	0	0	0	0
G2W53_001142	0	0	0	0	0	0	0	0	0	0	0	0	0	0	0	0	0	0	0	0	0
G2W53_001143	0	0	0	0	0	0	0	0	0	0	0	0	0	0	0	0	0	0	0	0	0
G2W53_001144	0.109938	0	0	0	0	0	0	0	0	0	0	0	0	0	0	0	0	0	0	0	0
G2W53_001145	0	0.0787922	0	0	0	0	0	0	0	0	0	0	0	0	0	0	0.0346722	0	0.036027	0	0
G2W53_001146	0	0	0	0	0	0	0	0	0	0	0	0	0	0	0	0	0	0	0	0	0
G2W53_001147	0	0	0	0	0	0	0	0	0	0	0	0	0	0	0	0	0	0	0	0	0
G2W53_001148	0	0	0	0	0	0	0	0	0	0	0	0	0	0	0	0	0	0	0	0	0
G2W53_001149	0	0	0	0	0	0	0	0	0	0	0	0	0	0	0	0	0	0	0	0	0
G2W53_001150	0	0	0.0705867	0	0	0	0	0	0	0	0	0	0.0753193	0.0605431	0	0	0	0	0	0	0
G2W53_001151	24.8515	25.0953	27.6454	21.0293	27.1906	25.1821	43.7347	29.9437	30.0086	52.7629	51.8246	40.0624	56.2503	41.0542	56.2308	27.3806	27.0312	27.1161	27.144	30.2532	30.9413
G2W53_001152	0	0	0.460985	0	0	0	0.0980717	0	0	0.0265889	0.0278024	0.0369488	0.0239615	0.0385214	0	0	0	0	0	0	0
G2W53_001153	0	0	0	0	0	0	0	0	0	0	0	0	0	0	0	0	0	0	0	0	0
G2W53_001154	6.1484	7.19276	5.77389	5.63341	4.36401	4.97961	5.58874	4.84318	6.29781	12.9143	12.4473	6.89768	8.07547	7.38217	7.41819	4.33295	5.69084	4.32992	5.76659	6.6414	6.71732
G2W53_001155	14.5236	7.0913	9.98801	6.06905	3.53542	5.55673	20.49	13.6576	12.6087	13.7001	12.4568	7.86358	9.93073	8.19825	7.86764	4.62435	5.42103	2.79597	4.63881	3.32436	4.9912
G2W53_001156	0	0	0	0	0	0	0	0	0	0	0	0	0	0	0	0	0	0	0	0	0
G2W53_001157	0	0	0	0	0	0	0	0	0	0	0	0	0	0	0	0	0	0	0	0	0
G2W53_001158	0	0	0	0	0	0	0	0	0	0	0	0	0	0	0	0	0	0	0	0	0
G2W53_001159	0	0	0	0	0	0	0	0	0	0	0	0	0	0	0	0	0	0	0	0	0
G2W53_001160	0	0	0	0	0	0.029044	0	0	0	0	0	0	0	0	0	0.0348938	0	0	0	0	0.0400158
G2W53_001161	0	0	0	0	0.104339	0.0819966	0	0	0.0909611	0	0	0	0	0	0	0	0.128726	0.0322478	0.0573241	0.243994	0.287834
G2W53_001162	0	0	0	0	0	0.372221	0.167754	0	0.206458	0.171783	0.538869	0	0	0	0	0.62759	0.919639	1.12887	0.955572	1.22019	1.2595
G2W53_001163	0	0	0	0.0598357	0	0	0	0	0	0	0	0	0	0	0	0	0	0	0	0	0
G2W53_001164	0	0	0	0	0	0	0	0	0	0	0	0	0	0	0	0	0	0	0	0	0
G2W53_001165	0.0463431	0.0339413	0.0307323	0.0522872	0.38766	0.304649	0.254986	0.244212	0.506933	0.0469491	0.0736376	0	0.317323	0	0.354354	0.343046	0.628353	0.462788	0.574556	0.500224	0.491751
G2W53_001166	2.97698	1.44122	1.53919	1.73634	2.17067	1.16093	0.128134	0.0966881	0.157696	1.56491	1.68179	0.845699	1.29275	0.818714	1.35339	3.65267	2.97875	3.63198	2.99841	3.26413	3.46034
G2W53_001167	0.204919	0	0	0	0	0	0	0	0	0	0	0	0	0	0	0	0	0	0	0.0576581	0.119031
G2W53_001168	0	0	0	0	0	0	0	0	0	0	0	0	0	0	0	0	0	0	0	0	0
G2W53_001169	0	0.367697	0.665868	0	0	0	0	0	0	0	0	0	0	0	0	0	0	0	0	0	0
G2W53_001170	0	0	0	0	0	0	0	0	0	0	0	0	0	0	0	0	0	0	0	0	0
G2W53_001171	0	0	0	0	0	0	0	0	0	0	0	0	0	0	0	0	0	0	0	0	0
G2W53_001172	0.442986	0	0	0	0	0	0	0	0	0	0	0	0	0	0	0	0	0	0	0	0
G2W53_001173	0.974855	0.28559	0.0646473	0.0549946	0	0.0457748	0.0412599	0.0934025	0	0	0	0	1.35929	0	0.632466	0.306142	0	0.157334	0	0.340122	0.438849
G2W53_001174	38.9978	39.8738	41.3668	22.385	25.1367	26.8463	45.8325	36.6695	41.5606	33.1492	34.5028	26.1013	29.5532	27.1386	29.2632	19.3808	19.7303	18.5862	18.9198	23.2834	23.9803
G2W53_001175	0	0.787922	0	1.82072	1.28561	0.505158	3.18733	0.515382	1.68116	0	0	0	2.06411	0	0	0	0	0	0	0	0
G2W53_001176	18.6054	23.3596	20.5636	7.99687	10.058	17.0565	13.4993	11.4597	19.3827	30.18	15.7787	17.0377	19.5483	15.0301	17.7959	13.7824	15.147	11.5101	8.39404	14.3552	11.8541
G2W53_001177	0	0	0	0	0	0	0	0	0	0	0	0	0	0	0	0	0	0	0	0	0
G2W53_001178	43.7312	43.3979	45.0775	22.3969	23.6427	18.8282	17.5583	18.4814	23.6394	10.6307	10.9302	9.56527	6.77188	9.67234	7.08952	5.14296	6.5358	5.2214	6.72535	7.08473	7.13736
G2W53_001179	39.4856	35.0306	41.7067	39.3832	46.6988	40.9997	20.0716	24.0837	18.9774	17.3646	16.9389	16.1897	16.2986	14.789	16.3827	13.073	15.8598	13.1246	14.813	15.4811	14.469
G2W53_001180	34.8088	31.8671	28.4103	33.2314	41.5965	39.9187	14.4492	14.11	16.7368	61.9947	67.0593	57.4332	52.0155	62.9747	59.1614	76.7985	60.2738	78.9375	68.1783	65.0768	79.1151
G2W53_001181	13.218	13.502	12.6407	12.8726	15.2966	12.5764	2.94442	3.2994	3.44255	14.9818	16.3869	15.6828	17.5428	15.4935	17.0173	7.69699	8.81195	8.09642	9.21109	9.30144	10.014
G2W53_001182	0.779044	0.760752	0.516621	0.146494	0.155159	0	0	0	0.541062	0.275904	0.288496	0.255604	0.663041	0.266482	0.694141	0.0839987	0.39388	0	0.511587	0	0
G2W53_001183	0.0841425	0.12325	0.111598	0.18987	0.0502751	0	0.0356126	0.120928	0.131487	0.212359	0.277563	0.147551	0.143531	0.15383	0.100175	0.0484893	0.227372	0.0996797	0.354384	0.269357	0.278035
G2W53_001184	2.96292	2.53168	3.27476	3.76082	3.98327	2.55063	0.627016	1.41941	0.385839	1.08822	0.910307	0.655298	0.68648	0.472976	0.479119	0.397569	0.660254	0.374588	0.322848	0.441698	0.455926
G2W53_001185	14.7023	15.3977	14.2595	13.0489	14.0497	13.6272	3.83088	4.56551	5.51298	5.12509	5.10723	4.46917	4.19243	4.54726	4.2187	2.19912	3.7657	2.15542	3.69279	3.90914	3.79189
G2W53_001186	0	0.0896822	0	0	0.219494	0.0574976	0.103653	0.117323	0.127567	0	0	0	0.0423304	0	0	0	0.150878	0.0440966	0.209031	0.142991	0.0491991
G2W53_001187	0	0	0	0	0	0	0	0	0	0	0	0	0	0	0	0	0	0	0	0	0
G2W53_001188	0	0	0	0	0	0.0895216	0	0.0913335	0	0	0	0	0	0	0	0	0	0	0	0	0
G2W53_001189	0	0	0	0	0	0	0	0	0	0	0	0	0	0	0	0	0	0	0	0	0
G2W53_001190	0	0	0	0	0	0	0	0	0	0	0	0	0	0	0	0	0	0	0	0	0
G2W53_001191	0.235336	0.172358	0.624251	4.11558	1.54674	3.64661	0.896437	0.789179	1.10326	0.697092	0.728906	0	0.628207	0	0.219224	4.88126	2.9855	5.45349	2.32661	6.13042	4.62424
G2W53_001192	0	0	0	0	0	0	0	0	0	0	0	0	0	0	0	0	0	0	0	0	0
G2W53_001193	0	0	0	0	0	0	0	0	0	0	0	0.0729699	0	0.0760755	0	0	0	0	0	0	0
G2W53_001194	0	0	0	0	0	0	0	0	0	0	0	0	0	0	0	0	0	0	0	0	0
G2W53_001195	0	0	0	0	0	0	0	0	0	0	0	0	0	0	0	0	0	0	0	0	0
G2W53_001196	0	0	0	0	0	0	0	0	0	0	0	0	0	0	0	0	0	0	0	0	0
G2W53_001197	0	0	0	0	0	0	0	0	0	0	0	0	0	0	0	0	0	0	0	0	0
G2W53_001198	0	0	0	0	0	0	0	0	0	0	0	0	0	0	0	0	0	0	0	0	0
G2W53_001199	0	0	0	0	0	0	0	0	0	0	0	0	0	0	0	0	0	0	0	0	0
G2W53_001200	0	0	0	0	0	0	0	0	0	0	0	0	0	0	0	0	0	0	0	0	0
G2W53_001201	0	0	0	0	0	0	0	0	0	0	0	0	0	0	0	0	0	0	0	0	0
G2W53_001202	0.140325	0.342575	0.124075	0	0.0279479	0	0	0.0224079	0	0.0396467	0.0456017	0.0220377	0.00357289	0.0287196	0	0.00362111	0.00424495	0.00372197	0.00441082	0.0120691	0.0124579
G2W53_001203	0.0331022	0	0	0	0	0	0	0	0	0	0	0	0	0	0	0	0	0	0	0	0
G2W53_001204	0	0	0	0	0	0	0	0	0	0	0	0	0	0	0	0	0	0	0	0	0
G2W53_001205	0	0	0	0	0	0	0	0	0	0	0	0	0	0	0	0	0	0	0	0	0
G2W53_001206	0	0	0	0	0	0	0	0	0	0	0	0	0	0	0	0	0	0	0	0	0
G2W53_001207	0.0778373	0	0	0	0	0	0	0	0	0	0	0	0	0	0	0	0	0	0	0	0
G2W53_001208	0.130686	0.0957129	0	0	0	0	0	0	0	0	0	0	0	0	0	0	0	0	0	0	0
G2W53_001209	0.0656275	0.048065	0	0.0370225	0	0	0	0	0	0	0	0.103468	0	0.107872	0	0	0	0	0	0.0377768	0.0389937
G2W53_001210	0.533151	0.976187	0.176779	0.300767	0.159279	0.375515	0	0	0	0	0	0	0.0470899	0	0.0492987	0	0.111895	0	0.0581337	0.159069	0.164193
G2W53_001211	1.10206	0.538093	4.38498	0.414472	0.658481	0.344986	5.59726	5.80747	6.50594	3.98456	2.6784	1.18652	0.769461	1.64935	0.268517	1.03979	0	1.60313	0.633278	0.866407	0.596212
G2W53_001212	0	0.179364	0	0	0.146329	0	0	0	0	0	0	0	0	0	0	0	0	0	0	0	0
G2W53_001213	0.184239	0.0674673	0.183266	0	0	0	0	0.0441306	0.0479841	0.0762272	0	0	0	0	0	0	0	0	0	0.0773496	0.0798413
G2W53_001214	0.281524	0	0	0	0	0	0.119153	0.134866	0.439929	0	0	0	0	0	0	0	0	0	0	0.0543514	0.0561023
G2W53_001215	0	0	0	0	0	0	0	0	0	0	0	0	0	0	0	0	0	0	0	0	0
G2W53_001216	0	0	0	0	0	0	0	0	0	0	0	0	0	0	0	0	0	0	0	0	0
G2W53_001217	0	0	0	0	0	0.0260967	0	0	0.0289498	0	0	0	0	0	0	0	0	0	0	0	0
G2W53_001218	0	0	0.264583	0	0.119195	0.187343	0.0844326	0	0	0.0970397	0.202937	0.0449498	0.0291502	0.140589	0.183105	0.0590872	0	0	0.0359866	0	0.0338802
G2W53_001219	0	0	0	0	0.173898	0	0	0	0	0	0	0	0	0	0	0	0.0501703	0	0.0521306	0	0
G2W53_001220	0	0	0	0.181424	0.576464	0.151008	0.0907425	0.205419	0.390874	0	0.0138191	0	0	0.0191469	0	0.0241414	0.113202	0.0372207	0.102922	0.0536421	0.0415276
G2W53_001221	0	0	0.136822	0.116393	0	0	0	0	0	0.108781	0.132703	0.0755828	0.11437	0.131333	0.0855248	0	0	0.0340406	0.0201704	0	0.0569693
G2W53_001222	0	0	0	0	0	0	0	0.601279	0	0	0	0	0	0	0	0	0	0	0	0	0
G2W53_001223	0	0	0	0	0	0	0	0	0	0	0	0	0	0	0	0	0	0	0	0	0
G2W53_001224	0	0	0	0	0	0	0	0	0	0	0	0	0	0	0	0	0	0	0	0	0
G2W53_001225	0	0	0	0	0	0	0	0	0	0	0	0	0	0	0	0	0	0	0	0	0
G2W53_001226	0	0	0	0	0	0	0	0	0	0	0	0	0	0	0	0	0	0	0	0	0
G2W53_001227	0	0.214192	0.193942	0	0	0	0	0	0	0.150782	1.41897	0.419062	0.271764	0.218449	0.569021	0	0	0.283103	0.167749	0	0
G2W53_001228	0	0	0	0	0	0	0	0	0	0	0	0	0	0	0	0	0	0.872559	0	0	0
G2W53_001229	0.489805	0.179364	0.162407	3.8684	9.65772	8.04967	0	0.117323	0	0.0238066	0.0539351	0.0330825	0.0429083	0.0229937	0.0449209	0.0833508	0.0934622	0.0856724	0.105943	0.0764978	0.083118
G2W53_001230	0	0	0	0	0	0	0	0	0	0	0	0	0	0	0	0	0	0	0	0	0
G2W53_001231	0	0	0	0	0	0	0	0	0	0	0	0	0	0	0	0	0	0	0	0	0
G2W53_001232	0	0	0	0	0	0	0	0	0	0	0	0	0	0	0	0	0	0	0	0	0
G2W53_001233	0	0	0	0	0	0	0	0	0	0	0	0	0	0	0	0	0	0	0	0	0
G2W53_001234	0	0	0	0	0	0	0	0	0	0	0	0	0	0	0	0	0	0	0	0	0
G2W53_001235	0	0	0.0400723	0	0	0	0	0	0	0	0	0	0	0	0	0	0	0	0	0	0
G2W53_001236	0	0	0	0	0.499958	0	0	0	0	0	0.0139921	0	0	0	0	0.0122218	0	0	0	0	0
G2W53_001237	0	0	0	0	0	0	0	0	0	0	0	0	0	0	0	0	0	0	0	0	0
G2W53_001238	0	0	0	0	0	0	0	0	0	0	0	0	0	0	0	0	0	0	0	0	0
G2W53_001239	0	0	0	0	0	0	0	0	0	0	0	0	0	0	0	0	0	0	0	0	0
G2W53_001240	0	0	0	0	0	0	0	0	0	0	0	0	0	0	0	0	0	0	0	0	0
G2W53_001241	0	0	0	0	0	0	0	0	0	0	0	0	0	0	0	0	0	0	0	0	0
G2W53_001242	0	0	0	0	0	0	0	0	0	0	0	0	0	0	0	0	0	0	0	0	0
G2W53_001243	0	0	0	0	0	0	0	0	0	0	0	0	0	0	0	0	0	0	0	0	0
G2W53_001244	0	0	0	0	0	0	0	0	0	0	0	0	0	0	0	0	0	0	0	0	0
G2W53_001245	0	0	0	0	0	0	0	0	0	0	0	0	0	0	0.0510742	0	0	0	0	0	0
G2W53_001246	0	0	0	0	0	0	0	0	0	0	0	0	0	0	0	0	0	0	0	0	0
G2W53_001247	0	0	0	0	0	0.181339	0	0	0	0	0	0	0	0	0	0	0	0	0	0	0
G2W53_001248	134.899	115.105	120.725	1025.51	803.671	1060.22	1073.71	1285.59	1339.17	356.911	323.634	495.975	414.617	450.429	438.01	2343	1809.21	2333.66	1715.49	2082.46	2044.4
G2W53_001249	0	0	0	0	0	0	0	0	0	0	0	0	0	0	0	0	0	0	0	0	0
G2W53_001250	0	0	0	0	0	0	0	0	0	0	0	0	0	0	0	0	0	0.0622397	0	0.0672744	0.0694416
G2W53_001251	0	0	0	0	0	0	0	0	0	0	0	0	0	0	0	0	0	0	0	0	0
G2W53_001252	0	0	0	0	0	0	0	0	0	0	0	0	0	0	0	0	0	0	0	0	0
G2W53_001253	0	0	0	0	0	0	0	0	0	0	0	0	0	0	0	0	0	0	0	0	0
G2W53_001254	0	0	0	0	0	0	0	0	0	0	0	0	0	0	0	0	0	0	0	0	0
G2W53_001255	0.218283	0	0	0	0	0	0	0	0	0	0	0	0	0	0	0	0	0	0	0	0
G2W53_001256	0	0	0	0	0	0	0	0	0	0	0.00451416	0	0	0	0	0	0	0	0	0	0
G2W53_001257	0	0	0	0	0	0	0	0	0	0	0	0	0	0	0	0	0	0	0	0	0
G2W53_001258	0	0	0	0	0	0	0	0	0	0	0	0	0	0	0	0	0	0	0	0	0
G2W53_001259	0	0	0	0	0	0	0	0	0	0	0	0	0	0	0	0	0	0	0	0	0
G2W53_001260	0.700536	0	0	0	0.837138	0	0	0	1.09471	0	0	1.03629	0	1.08039	0	0	0	0	0	0	0
G2W53_001261	0.446267	0.817104	0.295941	0.125877	0	0	0.283318	0	0.464912	2.5427	2.21562	2.94451	0.381906	1.22793	0.599728	0.58059	0.226871	0.596761	1.88589	0.430023	0.443876
G2W53_001262	0	0	0	0	0	0	0	0	0	0	0	0	0	0	0	0	0	0	0	0	0
G2W53_001263	0	0	0	0	0	0	0	0	0	0	0	0	0	0	0	0	0	0	0	0	0
G2W53_001264	8.39969	13.5765	14.7899	9.47706	8.30699	8.70425	6.86502	7.49286	6.03492	15.4393	15.3988	10.8925	12.2012	10.6678	12.9976	4.12195	17.5481	4.01377	16.1197	33.0204	26.8693
G2W53_001265	46.1313	44.88	41.6643	40.4927	33.7343	34.9165	17.9948	21.8522	26.9881	10.3915	10.6007	8.49202	7.94343	8.40465	8.02377	4.68121	14.8951	4.54722	15.1638	16.9169	17.6978
G2W53_001266	0	0	0.285372	0	0	0	0	0	0.112077	0	0.193813	0	0.167038	0.268536	0.524618	0	0.198458	0	0.412424	0.188083	0.194142
G2W53_001267	0	0	0	0	0	0	0	0	0	0	0	0	0	0	0	0	0	0	0	0	0
G2W53_001268	0	0	0	0	0	0	0	0	0	0	0	0	0	0	0	0	0	0	0	0	0
G2W53_001269	0	0	0	0	0	0	0	0	0	0	0	0	0	0	0	0	0	0	0	0	0
G2W53_001270	0.159804	0.351117	0.582855	0.225376	0.0954826	0.150073	0.0338178	0.0382777	0.0416201	0.193754	0.033766	0.0897488	0.320114	0.140353	0.0609325	0.029494	0.242027	0.0303155	0.215557	0.622587	0.541174
G2W53_001271	1.20492	1.63257	1.43827	0.373854	0.575951	0.254599	0.0764959	0.115446	0.125526	0.289133	0.205151	0.071748	0.130281	0.0897619	0.0681958	0.188627	0.243236	0.106635	0.218276	0.220043	0.28121
G2W53_001272	0	0	0	0	0.148748	0.116896	0.0351221	0.0795079	0.0864506	0	0	0	0	0	0	0.452745	0.176914	0.217166	0.330889	0.0670664	0.138454
G2W53_001273	0	0	0	0	0	0	0	0	0	0	0	0	0	0	0	0	0	0	0	0	0
G2W53_001274	0.936121	0.832522	0.642958	0.282908	0.279666	0.251177	0.0283004	0.0960978	0.0870743	0.25109	0.254344	0.250788	0.289918	0.227358	0.384948	0.0788327	0.268841	0.117859	0.261886	0.183128	0.17259
G2W53_001275	0	0	0	0	0	0	0	0	0	0	0	0	0	0	0	0	0	0	0	0	0
G2W53_001276	0	0	0	0	0	0	0	0	0	0	0	0	0	0	0	0.17228	0.20196	0	0	0.191402	0.197568
G2W53_001277	0	0	0	0	0	0.0772919	0	0.0788562	0	0	0	0	0	0	0	0	0	0	0	0	0
G2W53_001278	2.29349	2.66299	2.37412	1.15182	1.08626	0.879922	0.37881	0.375171	0.437069	0.68681	0.765505	0.471963	0.414895	0.524853	0.49132	0.413601	0.711122	0.439292	0.680131	0.704581	0.616606
G2W53_001279	1.58846	1.58642	1.20661	0.342148	0.345129	0.393277	0.110013	0.152193	0.225658	0.217499	0.227425	0.130514	0.191551	0.136069	0.219191	0.094811	0.164071	0.0881705	0.225476	0.0953028	0.10355
G2W53_001280	0	0	0	0	0	0.0354497	0.0319532	0.144669	0	0	0	0.101197	0	0.0527518	0	0.0665122	0.155942	0.0683648	0.202544	0.110842	0.114413
G2W53_001281	0.479666	0.327883	0.381708	0.432951	0.51588	0.48049	0.203015	0.0919152	0.116598	0.0569928	0.0758467	0.0215997	0.00466917	0.022519	0.0293291	0.146698	0.26073	0.1216	0.230568	0.168239	0.179085
G2W53_001282	0	0	0	0	0	0	0	0	0	0	0	0	0	0	0	0	0	0	0	0	0
G2W53_001283	0	0	0	0	0	0	0	0	0	0	0	0	0	0	0	0	0	0	0	0	0
G2W53_001284	0	0	0	0	0	0	0	0	0	0	0	0	0	0	0	0	0	0	0	0	0
G2W53_001285	0	0	0	0	0	0	0	0	0	0	0	0	0	0	0	0	0	0	0	0	0
G2W53_001286	0	0	0	0	0	0	0	0	0	0	0	0	0	0	0	0	0	0	0	0	0
G2W53_001287	0	0	0	0	0	0	0	0	0	0	0	0	0	0	0	0	0	0	0	0	0
G2W53_001288	0	0	0	0	0	0	0	0	0	0	0	0	0	0	0	0	0	0	0	0	0
G2W53_001289	0	0	0	0	0	0	0	0	0	0	0	0	0	0	0	0	0	0	0	0	0
G2W53_001290	0	0	0	0	0	0	0	0	0	0	0	0	0	0	0	0	0	0	0	0	0
G2W53_001291	0	0	0	0	0	0	0	0	0	0	1.0478	0	0.903048	0	0	0	0	0	0	0	0
G2W53_001292	0	0	0	0	0	0	0	0	0	0.112251	0	0	0	0.0813129	0	0	0	0	0	0	0.0587863
G2W53_001293	0	0	0	0	0	0	0	0	0	0	0	0	0	0	0	0	0	0	0	0	0
G2W53_001294	0	0	0	0	0	0	0	0	0	0	0	0	0	0	0	0	0	0	0	0	0
G2W53_001295	0	0	0	0	0	0	0	0	0	0	0	0	0	0	0	0	0	0	0	0	0
G2W53_001296	0	0	0	0	0	0	0	0	0	0	0	0	0	0	0	0	0	0	0	0	0
G2W53_001297	0	0	0	0	0	0	0	0	0	0	0	0	0	0	0	0	0	0	0	0	0
G2W53_001298	0	0	0	0	0	0	0	0	0	0	0	0	0	0	0	0	0	0	0	0	0
G2W53_001299	0	0.0633051	0	0.146284	0.206582	0.101466	0	0.020704	0	0.0750966	0.0392619	0	0.0338378	0	0.035425	0.102884	0.0402028	0.105749	0.0417736	0.228607	0.235971
G2W53_001300	0	0	0.0218556	0.00929614	0.019692	0.00773764	0.00697446	0.0157885	0.0171672	0.0294591	0.0308035	0	0.026548	0	0	0.0538127	0.0315418	0.0553115	0.0163871	0.0597857	0.0462838
G2W53_001301	13.4332	14.7576	16.8716	7.46329	8.14796	8.50576	13.9553	12.3831	11.238	2.92082	2.56152	3.53514	5.88706	3.86761	5.83725	1.26215	3.49721	1.06143	3.14468	4.52542	4.83568
G2W53_001302	0	0	0	0	0	0	0	0	0	0	0	0	0	0	0	0	0	0	0	0	0
G2W53_001303	0	0	0	1.45657	1.68965	2.59795	0.312228	0.412306	0.576396	0	0	0	0	0	0	0.238894	0.648538	0.219701	0.658562	0.447007	0.42536
G2W53_001304	0	0	0	0	0	0	0	0	0.424075	0	0	0	0	0	0	0	0	1.6272	0	0	0
G2W53_001305	0	0	0	0	0	0	0	0	0	0	0	0	0	0	0	0	0	0	0	0	0
G2W53_001306	0.136923	0	0	0	0	0	0	0	0	0	0	0	0	0	0	0	0	0	0	0	0
G2W53_001307	0	0	0	0	0	0.0623102	0	0	0	0	0	0	0	0	0	0	0	0	0	0	0
G2W53_001308	0	0	0	0	0	0	0	0	0	0	0	0	0	0	0	0	0.129559	0	0.134621	0	0
G2W53_001309	0	0	0	0	0	0	0	0	0	0	0	0	0	0	0	0	0	0	0	0	0
G2W53_001310	2.07745	3.80376	2.75531	2.34391	3.4135	3.1703	1.75853	1.61723	2.57004	1.27205	2.07828	0.5524	0.859761	0.691092	0.675066	1.08921	0.680989	1.26882	0.884496	1.29078	2.08181
G2W53_001311	0.244903	0	0	0.138157	0	0	0.103653	0.117323	0	0	0	0	0.188462	0	0.197302	0	0	0	0	0	0
G2W53_001312	7.63272	9.51603	8.84818	6.57383	8.66851	7.52362	4.16757	4.43807	4.00616	5.78466	5.99537	4.14322	3.9959	4.2088	3.89482	4.60843	4.88395	4.56932	5.04643	5.66297	5.15143
G2W53_001313	0	0	0	0	0	0	0	0	0	0	0	0	0	0	0	0	0	0	0	0	0
G2W53_001314	0.386193	0	0	0	0	0	0	0	0	0	0	0.571285	0	2.3824	0	0	0	0	0	0	0
G2W53_001315	0	0.612828	0	0	0	0	0	0	0	7.12583	3.72552	4.95114	0.802709	9.03326	1.68072	0	0	0	0	0	0
G2W53_001316	0	0	0	0	0	0	0	0	0	0	0	0	0	0	0	0	0	0	0	0	0
G2W53_001317	6.42038	7.95514	6.96974	3.20021	2.62751	2.66369	4.07606	4.15014	4.78741	10.6021	10.6781	10.5939	8.62772	10.9421	8.96549	2.36416	4.10024	2.39672	4.06321	4.28168	4.45675
G2W53_001318	6.24311	6.51567	6.21016	1.76097	2.23815	2.05204	3.36899	2.24311	3.08938	1.06166	1.24266	0.748665	0.899626	0.826442	0.762428	0.17367	0.254488	0.178507	0.193916	0.418052	0.315341
G2W53_001319	0	0	0.0895786	0.0762033	0	0.0634279	0.0571718	0	0	0.00818991	0	0	0	0	0	0	0	0	0	0	0
G2W53_001320	0.391208	0	0	0	0	0	0	0	0	0	0	0	0	0	0	0	0	0	0	0	0
G2W53_001321	0	0	0	0	0	0	0	0	0	0	0	0	0	0	0	0	0	0	0	0	0
G2W53_001322	0	0	0	0.031353	0.0996226	0.0260967	0	0	0	0	0	0	0	0	0	0	0	0	0	0.174938	0.180573
G2W53_001323	0	0	0	0	0	0	0	0	0	0	0	0	0	0	0	0	0	0	0	0	0
G2W53_001324	0	0	0	0	0	0	0	0	0	0	0	0	0	0	0	0	0	0	0	0	0
G2W53_001325	0.242928	0	0	0	0	0	0	0	0	0	0	0	0	0	0	0	0	0	0	0	0
G2W53_001326	0	0	0	0	0	0	0	0	0	0	0	0	0	0	0	0	0	0	0	0	0
G2W53_001327	0	0	0	0	0	0	0	0	0	0	0	0	0	0	0	0	0	0	0	0	0
G2W53_001328	0	0	0	0	0	0	0	0	0	0	0	0	0	0	0	0	0	0	0	0	0
G2W53_001329	0	0	0	0	0.367316	0.865985	0	0	0	0	0	0	0	0	0	0	2.10203	0	4.36833	11.2888	11.6525
G2W53_001330	0.0635507	0	0	18.1047	23.1626	20.8585	1.50625	1.644	1.39032	0	0	0	0.00226233	0	0.00236845	2.43273	4.46726	2.418	4.49099	2.72823	2.68728
G2W53_001331	0	0	0	0	0	0	0	0	0	0	0	0	0	0	0	0	0	0	0.10681	0	0
G2W53_001332	0	0	0	0	0	0	0	0	0	0	0	0	0	0	0	0	0	0	0	0	0
G2W53_001333	0	0	0	0	0	0	0	0	0	0	0	0	0	0	0	0	0	0	0	0	0
G2W53_001334	0	0	0	0	0	0	0	0	0	0	0	0	0	0	0	0	0	0	0	0	0
G2W53_001335	0	0	0	0	0	0	0	0	0	0	0	0	0	0	0	0	0	0	0	0	0
G2W53_001336	0	0	0	0	0	0	0	0	0	0	0	0	0	0	0	0	0	0	0	0	0
G2W53_001337	0	0	0	0	0	0	0	0	0	0	0	0	0	0	0	0	0	0	0	0	0
G2W53_001338	0	0	0	0	0	0	0	0	0	0	0	0	0	0	0	0	0	0	0	0	0
G2W53_001339	0	0	0	0	0	0	0	0	0	0	0	0	0	0	0	0	0	0	0	0	0
G2W53_001340	0	0	0	0	0	0.0729094	0	0	0	0	0	0	0	0	0	0	0	0	0	0	0
G2W53_001341	0	0	0.0839329	0.714006	0.151248	0.416012	0	0	0	0	0	0	0	0	0	0.141551	0.0237053	0.145493	0.0246315	0.134797	0.139139
G2W53_001342	0	0	0	0	0	0	0	0	0	0	0	0	0	0	0	0	0	0	0	0	0
G2W53_001343	0	0	0	0	0	0	0	0	0	0	0	0	0	0	0	0	0	0	0	0	0
G2W53_001344	0	0	0	0	0	0	0	0	0	0	0	0	0	0	0	0	0	0	0	0	0
G2W53_001345	0	0	0	0	0	0	0	0	0	0	0	0	0	0	0	0	0	0	0	0	0
G2W53_001346	0	0	0	0	0	0	0	0	0	0	0	0	0	0	0	0	0	0	0	0	0
G2W53_001347	0	0	0	0	0	0	0	0	0	0	0	0	0	0	0	0	0	0	0	0	0
G2W53_001348	5.49542	4.47199	9.71807	0	0	0	0.0861441	0.0975047	0	12.9839	11.7251	19.8881	16.8864	18.8107	15.7297	0	0	0	0	0	0
G2W53_001349	2.43418	2.45131	3.43023	0	0	0	0	0	0	5.83022	5.75762	4.05093	8.17304	4.6926	5.50054	0	0	0	0	0	0
G2W53_001350	0.441687	0.388185	0.937292	0.0498339	0	0.0414792	0	0	0	0.227728	0.37419	0.135625	0.234542	0.188529	0.184157	0	0	0	0	0	0
G2W53_001351	0	0	0	0	0	0	0	0	0	0	0	0	0	0	0	0	0	0	0	0	0
G2W53_001352	0	0	0	0	0	0	0	0	0	0	0	0.224674	0	0	0.152536	0	0	0	0	0.164059	0
G2W53_001353	0	0	0	0	0	0	0	0	0	0	0	0	0	0	0	0	0	0	0	0	0
G2W53_001354	0	0	0	0	0	0	0	0	0	0	0	0	0	0	0	0	0	0	0	0	0
G2W53_001355	238.182	227.435	174.077	0	0.179387	0.0469914	0	0	0	79.0606	81.6364	249.916	200.27	252.839	201.247	0.483116	0.264295	0.463467	0.313854	0	0
G2W53_001356	0	0	0	0	0	0	0	0	0	0	0	0.0211654	0	0.0220662	0	0	0	0	0	0	0
G2W53_001357	0	0	0	0	0.0447723	0	0	0	0	0	0	0	0	0	0	0	0	0	0	0	0
G2W53_001358	0	0	0	0	0	0	0	0	0	0	0	0	0	0	0	0	0	0	0	0	0
G2W53_001359	0	0	0	0	0	0	0	0	0	0	0	0	0	0	0	0	0	0	0	0	0
G2W53_001360	0	0	0	0	0	0	0	0	0	0	0	0	0	0	0	0	0	0	0	0	0
G2W53_001361	0	0	0	0	0	0	0	0	0	0	0	0	0	0	0	0	0	0	0	0	0
G2W53_001362	0	0	0	0	0	0	0	0	0	0	0	0	0	0	0	0	0	0	0	0	0
G2W53_001363	0	0	0	0	0	0	0	0	0	0	0	0	0	0	0	0	0	0	0	0	0
G2W53_001364	0	0	0	0	0	0	0	0	0	0	0	0	0	0	0	0	0	0	0	0	0
G2W53_001365	0.45641	0	0	0	0	0	0	0	0	0	0	0	0	0	0	0	0	0	0	0	0
G2W53_001366	0	0	0	0	0	0	0	0	0	0	0	0	0	0	0	0	0	0	0	0	0
G2W53_001367	0	0	0	0	0	0	0	0	0	0	0	0	0	0	0	0	0	0	0	0	0
G2W53_001368	0	0	0	0	0	0	0	0	0	0	0	0	0	0	0	0	0	0	0	0	0
G2W53_001369	0	0	0	0	0	0	0	0	0	0	0	0	0	0	0	0	0	0	0	0	0
G2W53_001370	0	0	0	0	0	0	0	0	0	0	0	0	0	0	0	0	0	0	0	0	0
G2W53_001371	0	0	0	0	0	0	0	0	0	0	0	0	0	0	0	0	0	0	0	0	0
G2W53_001372	0	0	0	0	0	0	0	0	0	0	0	0	0	0	0	0	0	0	0	0	0
G2W53_001373	0	0	0	0	0	0	0	0	0	0	0	0	0	0	0	0	0	0	0	0	0
G2W53_001374	0	0	0	0	0	0	0	0	0	0	0	0	0	0	0	0	0	0	0	0	0
G2W53_001375	0	0	0	0	0	0	0	0	0	0	0	0	0	0	0	0	0	0	0	0	0
G2W53_001376	0	0	0	0	0	0	0	0	0	0	0	0	0	0	0	0	0	0	0	0	0
G2W53_001377	0	0	0	0	0	0	0	0	0	0	0	0	0	0	0	0	0	0	0	0	0
G2W53_001378	0	0	0	0	0	0	0	0	0	0	0	0	0	0	0	0	0	0	0	0	0
G2W53_001379	0	0	0	0	0	0	0	0	0	0	0	0	0	0	0	0	0	0	0	0	0
G2W53_001380	0	0	0	0	0	0	0	0	0	0	0	0	0	0	0	0	0	0	0	0	0
G2W53_001381	0	0	0	0	0	0	0	0	0	0	0	0	0	0	0	0	0	0	0	0	0
G2W53_001382	0	0	0	0	0	0	0	0	0	0	0	0	0	0	0	0	0	0	0	0	0
G2W53_001383	0	0	0	0	0	0	0	0	0	0	0	0	0	0	0	0	0	0	0	0	0
G2W53_001384	0	0	0	0	0	0	0	0	0	0	0	0	0	0	0	0	0	0	0	0	0
G2W53_001385	0	0	0	0	0	0	0	0	0	0	0	0	0	0	0	0	0	0	0	0	0
G2W53_001386	0	0	0	0	0	0	0	0	0	0	0	0	0	0	0	0	0	0	0	0	0
G2W53_001387	0	0	0	0	0	0	0	0	0	0	0	0	0	0	0	0	0	0	0	0	0
G2W53_001388	0	0	0	0	0	0	0	0	0	0	0	0	0	0	0	0	0	0	0	0	0
G2W53_001389	0	0	0	0	0	0	0	0	0	0	0	0	0	0	0	0	0	0	0	0	0
G2W53_001390	0	0	0	0	0	0	0	0	0	0	0	0	0	0	0	0	0	0	0	0	0
G2W53_001391	0	0	0	0	0	0	0	0	0	0	0	0	0	0	0	0	0	0	0	0	0
G2W53_001392	0	0	0	0.11482	0	0	0	0	0	0	0	0	0	0	0	0	0	0	0	0	0
G2W53_001393	0	0	0.117506	0	0	0	0	0	0	0	0	0	0	0	0	0	0	0	0	0	0
G2W53_001394	2.51025	0	0	0	0	0	0	0	0	0	0	0	0	0	0	0	0	0	0	0	0
G2W53_001395	0	0	0	0	0	0	0	0	0	0	0	0	0	0	0	0	0	0	0	0	0
G2W53_001396	0	0	0	0	0	0	0	0	0	0	0	0	0	0	0	0	0	0	0	0	0
G2W53_001397	0	0	0	0	0	0	0	0	0	0	0	0	0	0	0	0	0	0	0	0	0
G2W53_001398	0.119536	0	0	0	0	0	0	0	0	0	0	0	0	0	0	0	0	0	0	0	0
G2W53_001399	0	0	0	0	0	0	0	0	0	0	0	0	0	0	0	0	0	0	0	0	0
G2W53_001400	0	0	0	0	0	0	0	0	0	0	0	0	0	0	0	0	0	0	0	0	0
G2W53_001401	0	0	0	0	0	0	0	0	0	0	0	0	0	0	0	0	0	0	0	0	0
G2W53_001402	0	0	0	0	0	0	0	0	0	0	0	0	0	0	0	0	0	0	0	0.208135	0
G2W53_001403	0	0	0	0	0	0	0	0	0	0	0	0	0	0	0	0	0	0	0	0	0
G2W53_001404	0	0	0	0	0.125425	0.147851	0	0	0	0	0	0	0	0	0	0.0584193	0.0684838	0.120093	0.0711596	0	0.267978
G2W53_001405	0	0	0	0	0	0	0	0	0	0	0	0	0	0	0	0	0.170529	0	0	0	0
G2W53_001406	0	0	0	0	0	0	0	0	0	0	0	0	0	0	0	0	0	0	0	0	0
G2W53_001407	0	0	0	0	0	0	0	0	0	0.00987463	0	0	0	0	0	0	0	0	0	0	0
G2W53_001408	0	0	0	0	0	0	0	0	0	0	0	0	0	0	0	0	0	0	0	0	0
G2W53_001409	0	0	0	0	0	0	0	0	0	0	0	0	0	0	0.00768492	0	0	0	0	0	0
G2W53_001410	0	0	0	0	0	0	0	0	0	0	0	0	0	0	0	0	0	0	0	0	0
G2W53_001411	0	0	0	0	0	0.118861	0	0	0	0	0	0	0	0	0	0	0	0	0	0.162421	0
G2W53_001412	0	0	0	0	0	0	0	0	0	0	0	0	0	0	0	0	0	0	0	0	0
G2W53_001413	0.375755	2.56853	0.249181	0	0.0374189	0	0	0	0	0	0	0	0	0	0	0.00548011	0	0.00563275	0	0.0121768	0.012569
G2W53_001414	0	0	0	0	0	0	0	0	0	0	0	0	0	0	0	0	0	0	0	0	0
G2W53_001415	0	0	0	0	0	0	0	0	0	0	0	0	0	0	0	0	0	0	0	0	0
G2W53_001416	0	0	0	0	0	0	0	0	0	0	0	0	0	0	0	0	0	0	0	0	0
G2W53_001417	0	0	0	0	0	0	0	0	0	0	0	0	0	0.112577	0	0	0	0	0	0	0
G2W53_001418	0	0	0	0	0	0	0	0	0	0.0254158	0	0	0	0	0	0	0	0	0	0	0
G2W53_001419	18.8821	18.5005	15.8301	11.2576	12.6027	11.2088	2.67281	3.32783	3.58553	13.8167	14.122	17.0748	13.3858	16.7875	13.5735	6.15583	7.71595	6.22994	7.72903	7.94389	8.44416
G2W53_001420	12.5612	10.9219	13.3634	9.55456	8.43012	10.0073	16.8185	17.9243	19.6445	14.2845	14.8286	5.78606	11.7027	5.82327	11.3765	8.77309	13.7936	8.55302	13.8739	16.9002	16.6458
G2W53_001421	0	0	0	0	0	0	0	0	0	0	0	0	0	0	0	0	0	0	0	0	0
G2W53_001422	4.65315	6.27775	10.0692	1.9342	1.0243	1.95492	7.67032	6.45275	8.16431	2.285	2.26982	3.17532	1.44144	2.97941	0.862317	1.8783	1.10095	2.03787	1.14396	1.27526	1.43601
G2W53_001423	0	0	0	0	0	0	0	0	0	0	0	0	0	0	0	0	0	0	0	0	0
G2W53_001424	0	0	0	0	0	0	0	0	0	0	0	0	0	0	0	0	0	0	0	0	0
G2W53_001425	0	0.0915428	0	0.0352559	0.186706	0.0880358	0	0	0	0	0	0	0	0	0	0.112332	0.08779	0.115461	0.0456101	0.0208002	0.0214702
G2W53_001426	0	0	0.570744	0	1.02848	0	0	0	0.448308	0	0	0	0	0	0	0	5.88569	0	2.03855	0	0
G2W53_001427	82.126	93.0174	91.5793	75.3218	98.7484	91.1741	50.0928	54.8951	45.5881	15.9189	16.2262	11.483	14.8935	11.2036	15.0431	12.2245	12.6828	12.0187	12.5598	14.0275	13.5313
G2W53_001428	0	0	0	0	0	0	0	0	0	0	0	0	0	0	0	0	0	0	0	0	0
G2W53_001429	84.6314	81.5937	93.38	83.3483	87.7069	93.8471	63.6454	61.1587	65.2537	60.0152	61.2347	48.2624	38.239	48.4217	39.7584	71.9359	61.613	65.7543	57.8771	48.0703	53.5762
G2W53_001430	0	0	0	0	0	0	0	0	0	0	0	0	0	0	0	0	0	0	0	0	0
G2W53_001431	0	0	0	0	0	0.0297152	0	0.0303166	0.0329638	0	0	0	0	0	0	0	0	0	0	0	0
G2W53_001432	0	0	0	0	0	0	0	0	0	0	0	0	0	0	0	0	0	0	0	0	0
G2W53_001433	0	0	0	0	0	0	0	0	0	0	0	0	0	0	0	0	0	0	0	0	0
G2W53_001434	0.137235	0.301528	0.0455035	0.270964	0.122996	0.225537	0	0	0.0357421	0	0	0	0.0324996	0	0.034024	0.0494073	0.231677	0.0507834	0.220668	0.311051	0.339958
G2W53_001435	0	0	0	0	0	0	0	0	0	0	0	0	0	0	0	0.0804603	0	0	0	0	0
G2W53_001436	25.131	24.8915	25.4859	14.833	12.8298	13.6467	8.40789	9.23826	10.6683	21.4975	22.1209	16.0377	15.0734	15.7551	15.3558	10.952	12.7424	10.7838	12.399	16.3149	16.1993
G2W53_001437	61.6118	63.8515	70.1928	42.8472	37.6291	53.8343	35.2292	39.9116	42.7643	5.63252	5.75376	4.4821	4.80672	4.54741	4.95048	3.54298	4.58446	3.47502	4.52275	6.22066	6.27141
G2W53_001438	106.223	103.342	124.587	84.9667	70.0993	94.5442	53.3458	58.4823	64.0019	143.454	121.766	155.961	130.039	157.708	121.012	83.2383	148.175	81.5957	118.29	131.866	117.553
G2W53_001439	0	0	0	0	0	0	0	0	0	0	0	0.0796667	0	0	0	0	0	0	0	0	0
G2W53_001440	2.91513	4.50725	4.08112	3.47176	3.29004	4.25853	5.34649	3.72405	2.53077	15.8607	15.503	13.416	18.3328	14.4865	13.012	6.61332	17.7204	3.23691	16.4947	27.6401	24.9191
G2W53_001441	0	0	0	0	0	0	0	0	0	0	0	0	0	0	0	0	0	0.269985	0.639905	0.145912	0.150612
G2W53_001442	115.126	124.139	100.753	20.849	21.2049	20.3252	9.98518	9.16773	11.1813	21.058	20.6658	22.8649	30.2296	21.9476	30.0962	3.30405	4.37305	3.20686	4.37869	5.9637	5.78913
G2W53_001443	0.900876	0.907215	0.522737	6.16207	7.23303	5.6842	0.262136	0.512492	0.8212	6.53312	6.20455	4.41438	2.48465	4.16808	2.31845	12.2077	13.4124	11.6474	13.0029	11.4949	11.7396
G2W53_001444	0	0	0	0	0	0	0	0	0	0	0	0	0	0	0	0	0	0	0	0	0
G2W53_001445	0	0	0	0	0	0	0	0	0	0	0	0	0	0	0	0	0	0	0	0	0
G2W53_001446	0	0	0	0	0	0	0	0	0	0	0	0	0	0	0	0	0	0	0	0	0
G2W53_001447	2.00153	1.5392	1.59277	1.69369	1.19591	1.97364	0.0847131	0.527368	0.104258	1.81001	1.47203	1.02473	0.845781	0.679855	0.822206	1.40825	3.58884	1.44747	3.72906	3.12913	3.30015
G2W53_001448	0	0.361669	0	0	0	0	0	0	0	0	0	0	0.94746	0	0	0.480124	0	0	0	0	0.5506
G2W53_001449	47.0535	48.4179	53.561	29.604	32.2746	32.1433	32.0439	29.1423	30.0072	17.6106	17.4599	12.0224	15.62	12.0885	15.7256	4.94771	5.34332	4.77815	5.44171	5.82912	5.79867
G2W53_001450	0	0	0	0.0453156	0.0959919	0	0.0339982	0	0.0418421	0	0	0	0	0	0	0	0	0	0	0.134271	0.138597
G2W53_001451	0	0	0	0	0	0	0	0	0	0	0	0	0.0177904	0	0	0	0	0.0185327	0	0	0
G2W53_001452	0	0	0	0	0	0	0	0	0	0	0	0	0	0	0	0	0	0	0	0	0
G2W53_001453	0	0	0	0	0	0	0	0	0	0	0	0	0	0	0	0	0	0	0	0	0
G2W53_001454	10.2895	11.1401	11.323	4.33246	6.5044	6.02188	0.725828	0.571513	0.582579	9.60209	9.7924	6.17749	7.79859	7.21325	7.88478	8.55348	10.4078	8.06835	10.0891	11.608	11.0507
G2W53_001455	22.021	24.5723	23.3513	16.2902	18.6812	21.2654	13.8044	12.4403	12.9314	6.37341	6.29983	8.02638	8.07695	8.22371	7.51626	13.5523	19.8855	12.8079	20.1086	20.8165	20.444
G2W53_001456	8.41333	6.88677	8.29235	1.54485	1.18281	1.25487	1.29867	1.23285	1.77015	13.3213	13.8643	10.6582	7.72342	10.8419	7.47047	0.794111	1.6956	0.699624	1.69276	2.04809	2.30921
G2W53_001457	0	2.54559	0.384154	0	0	0	0	0	0	1.23332	0.644801	2.57078	0	0.893399	0	0	0	0	0	0	0
G2W53_001458	0.120492	0	0.0799041	0	0	0	0	0	0	0	0	0	0.0257248	0	0.0269314	0	0	0	0	0	0
G2W53_001459	0	0	0	0	0	0	0	0	0	0	0	0	0	0	0	0	0	0	0	0	0
G2W53_001460	0	0	0	0	0	0	0	0	0	0	0	0	0	0	0	0	0	0	0	0	0
G2W53_001461	0	0	0	0	0	0	0	0	0	0	0	0	0	0	0	0	0	0	0	0	0
G2W53_001462	24.7326	26.4742	15.7705	5.72407	4.16807	4.01999	2.54986	4.86086	7.43248	17.7378	17.7351	3.77833	12.1346	4.12671	12.7038	2.01032	3.88155	1.94476	3.74512	6.56899	6.50938
G2W53_001463	48.0826	57.277	47.3145	21.921	13.9988	11.1545	9.32877	11.6149	18.072	27.6563	28.2035	10.7363	18.3305	10.6979	19.029	4.30883	7.35711	4.42884	7.53048	12.2799	12.3175
G2W53_001464	48.4837	60.3023	52.6987	21.5249	18.1699	12.7973	10.6851	11.8194	16.438	62.3105	64.4684	30.382	39.0117	35.1593	42.6979	13.5788	21.3022	13.7517	19.4589	29.5064	27.9379
G2W53_001465	40.6189	42.5862	45.7987	18.5328	19.3782	14.4401	9.32877	13.0228	14.5974	23.2729	23.5877	23.8346	16.3529	24.3538	16.0352	9.7909	15.2703	9.80107	14.2768	13.3054	13.0506
G2W53_001466	0.269299	0.338112	0.204097	0.0868115	0	0.0361288	0.0325653	0.01843	0.0601179	0.106907	0.12576	0.086661	0.0843001	0.0968028	0.0714438	0.00406847	0	0.00418179	0	0	0
G2W53_001467	9.09656	10.1299	8.57881	2.08211	2.16071	1.99562	0.725828	0.946568	1.22342	3.86102	3.85002	2.81251	3.71099	2.97732	3.7602	0.504794	0.708445	0.526162	0.649523	1.05846	0.994715
G2W53_001468	0	0	0	0.44602	0.944802	0.816738	0.167314	0.151503	0.0411832	0.0141137	0	0	0	0	0	0.309376	0.151114	0.198745	0.188423	0.171858	0.162611
G2W53_001469	0.706008	2.0683	0.936376	6.43888	7.45249	4.19912	0	0.0563699	0.122584	0	0	0.107417	0	0.0559945	0	1.12961	3.60023	0.979657	3.26791	4.74545	4.77688
G2W53_001470	9.33565	9.29878	7.01637	0.421323	0.632178	0.964392	0.395124	0.506863	0.421447	0.299871	0.438979	0.583395	0.432382	0.868892	0.339497	0.98599	0.77057	1.01345	0.533786	0.730288	0.942267
G2W53_001471	31.7881	32.9264	26.0993	15.4563	18.3603	17.3429	7.3677	9.9347	8.35791	4.25158	4.47375	2.01923	3.49195	2.41705	3.60497	2.50685	2.79467	2.39984	2.45482	4.17766	4.00221
G2W53_001472	5.3733	4.53162	3.99521	3.21496	3.34026	3.16019	1.10264	1.43007	1.35704	0.748177	0.650099	0.658959	0.664747	0.641204	0.636277	0.510102	0.654395	0.524309	0.609623	0.641572	0.728464
G2W53_001473	80.0723	82.7201	86.3931	17.1377	18.5335	17.5979	8.31007	8.57876	8.19519	8.17842	8.15462	7.46843	6.73851	7.10922	7.1097	5.86907	8.14677	5.96399	7.9939	9.84006	9.97349
G2W53_001474	34.7469	31.2003	32.1285	10.5489	16.028	14.2562	8.05826	8.30661	9.26217	25.1653	25.6472	19.4674	19.7055	19.8342	19.4569	7.78769	7.40587	7.82506	7.09238	7.94053	8.39665
G2W53_001475	0	0	0	1.06208	0.449962	0.707221	0	0	0	0	0	0	0	0	0	0.22869	0.107235	0.188048	0.111425	0	0
G2W53_001476	63.413	63.7042	70.8197	23.101	20.1548	29.7067	17.8615	20.2171	17.8008	22.2512	21.6578	14.8982	15.4422	15.1414	15.4784	4.38036	3.97963	4.22096	4.02396	4.15686	4.22797
G2W53_001477	0	0	0	0	0	0	0	0	0	0	0	0	0	0	0	0	0	0	0	1.06683	1.1012
G2W53_001478	0	0	0	0	0	0	0	0	0	0	0	0	0	0	0	0	0	0	0	0	0
G2W53_001479	0	0	0	0	0	0	0	0	0	0	0.468946	0	0	0	0	0	0	0	0	0	0
G2W53_001480	4.13453	5.94804	4.70024	10.5792	11.6461	9.70695	4.49976	3.74915	3.38429	1.92113	1.9344	1.87865	2.69311	2.47403	2.95369	12.1526	14.6272	12.8251	14.2488	17.6169	17.2156
G2W53_001481	0.485855	0.711672	0.644388	0.548172	0.870894	0.228136	0.514086	0.232753	0.88577	1.87807	0.872789	1.15992	0.940266	1.20929	0.98437	0.571774	1.11713	0.1959	0	0.211747	0
G2W53_001482	0	1.02613	0.464559	0.395194	0	0	0	0	0	1.49145	1.55952	4.14514	0	1.08039	0.703557	0	0	0	0	0	0
G2W53_001483	1.87804	2.54664	1.94828	0.220284	0.177763	0.174622	0.550897	0.436484	0.435855	4.21103	4.12924	2.73083	2.27694	2.5488	2.36609	0.170939	0.500971	0.1757	0.437258	0.474782	0.45087
G2W53_001484	1.09385	1.01682	0.976482	0.854414	1.03064	0.928474	0.373933	0.423247	0.591692	0.388682	0.365778	0.21605	0.700546	0.112622	0.586724	0.674501	1.2901	0.656799	1.38375	0.86769	0.854931
G2W53_001485	0	0	0	0	0	0	0	0	0	0	0	0	0	0	0	0	0	0	0	0	0
G2W53_001486	0	0	0	0	0	0	0	0	0	0	0	0	0	0	0	0	0	0	0	0	0
G2W53_001487	12.6596	17.3432	12.5553	12.1153	13.6086	11.4111	0.837197	1.78692	2.14902	2.09446	2.13117	2.01859	2.88197	2.03925	2.8153	2.27293	2.59217	2.29395	2.50554	3.07368	3.1727
G2W53_001488	15.6041	19.2938	16.1545	6.62846	4.85176	6.37816	11.9574	10.5407	12.4552	9.19604	8.95744	7.10819	7.12222	7.05239	6.94719	2.67993	3.02126	2.50128	3.02674	3.57059	3.69739
G2W53_001489	0	0	0	0	0	0	0	0	0	0	0	0	0	0	0	0	0	0	0	0	0
G2W53_001490	55.0821	56.5849	59.8842	51.2041	57.7534	58.1942	66.3245	65.176	73.8674	11.9681	11.4994	7.96211	8.23897	8.53912	7.96079	6.8846	7.48402	6.90734	7.77644	9.87271	10.0924
G2W53_001491	123.425	127.744	130.854	47.034	46.4455	49.6379	32.0404	40.8059	31.6166	31.6841	31.8877	39.887	32.5543	39.4102	32.8817	11.4802	13.458	11.5651	13.3809	16.7733	16.3312
G2W53_001492	15.9423	15.74	16.9095	8.32276	6.70996	9.18146	21.4725	17.532	17.8471	4.43798	4.76688	2.98561	3.14025	3.10295	3.0405	2.26893	2.94736	2.16824	3.02518	2.84779	2.89734
G2W53_001493	0.338461	0	0.22445	1.33656	0.303345	0.158926	0.501378	0.972856	1.49856	3.3438	2.82402	3.21692	1.39079	3.16751	0.849348	0.234927	2.0655	0.362205	2.00312	3.13204	2.69411
G2W53_001494	7.19356	2.96353	2.9815	4.05811	2.95497	0.211111	3.04461	4.52305	4.68382	91.8913	96.085	95.1062	33.6419	99.154	36.5745	2.62277	8.71141	4.94233	7.98687	11.6555	12.5323
G2W53_001495	8.60658	11.3461	8.56115	6.31181	0.514242	1.6165	6.92106	4.53536	6.27631	98.031	114.001	71.2964	41.2822	69.0215	41.4898	1.67357	3.92379	3.44037	6.11566	8.36701	9.59617
G2W53_001496	46.619	37.295	28.5372	20.2302	17.9985	15.8283	21.856	24.3947	28.7664	3.2586	3.29033	2.79858	1.36747	2.92782	1.30626	0.325725	0.456711	0.321668	0.490115	0.617323	0.600589
G2W53_001497	2.31716	2.12133	2.30493	0.65359	0.692249	0.816024	0.245179	0	0	3.69995	7.09281	0.856928	1.11144	0	0.581788	0	0	0	0	0	0
G2W53_001498	0	0	0	0	0	0	0	0	0	0	0	0	0	0	0	0	0	0	0	0	0
G2W53_001499	20.6227	19.9688	17.7223	17.0369	22.2443	17.6987	0.686502	1.29506	1.28745	5.60586	5.7511	3.30711	7.57786	3.37124	7.70877	4.34725	6.45517	4.51797	6.70739	8.82776	9.27832
G2W53_001500	0	0	0	0	0	0	0	0	0	0	0	0	0	0	0	0	0	0	0	0	0
G2W53_001501	75.2253	69.0788	64.0761	17.6434	21.0474	19.864	10.7289	10.8033	12.0896	27.2948	27.4675	31.8695	27.3717	31.5163	26.9614	9.18458	9.55836	9.10323	9.01856	8.48601	8.27573
G2W53_001502	0	0	0	0	0	0	0	0	0	0	0	0	0	0	0	0	0	0	0	0	0
G2W53_001503	0	0	0	0	0	0	0	0	0	0	0	0	0	0	0	0	0	0	0	0	0
G2W53_001504	0	0	0	0	0	0	0	0	0	0	0	0	0	0	0	0	0	0	0	0	0
G2W53_001505	17.3986	13.9471	10.5046	0.0976629	0.517198	0.365804	0.073272	0	0	3.00426	2.94585	5.45671	2.16816	5.59865	2.24633	0.18217	0.547231	0.210649	0.554744	0.0126494	0.0130569
G2W53_001506	38.7737	35.1292	34.369	12.6361	13.7988	14.2532	6.99578	7.10434	8.24772	6.75917	7.24612	9.98574	7.42947	9.5205	7.55251	4.3183	5.24501	4.71098	5.41197	4.88422	5.00581
G2W53_001507	0	0	0	0	0	0	0	0	0	0	0	0	0	0	0	0	0	0	0	0	0
G2W53_001508	0	0	0	0	0	0	0	0	0	0	0	0	0	0	0	0	0	0	0	0	0
G2W53_001509	21.3135	16.2342	24.4989	6.89353	8.15025	7.7394	21.1687	17.0173	14.6546	6.88333	6.01879	8.16549	4.51726	6.84516	4.1182	1.18289	2.33681	0.833075	2.18798	1.72792	1.48213
G2W53_001510	42.9025	41.9175	42.6761	16.7874	17.7803	16.8018	40.0251	32.4472	35.2329	26.8012	27.1974	21.8884	23.4599	23.9339	23.3374	6.46079	9.22033	6.29013	9.62948	9.85291	10.2163
G2W53_001511	42.0467	40.4467	47.4431	16.5213	16.8736	13.4568	39.1333	32.6695	36.5029	23.2782	23.2085	15.1209	19.9534	16.3135	20.4808	4.44999	7.36125	4.06572	7.58865	9.33853	10.093
G2W53_001512	49.0951	43.8968	48.6306	28.6135	26.7895	18.9804	52.6688	48.7453	59.1329	17.6027	17.0501	15.1587	11.9047	15.2403	11.6067	8.40876	11.7317	8.23212	12.2622	12.2862	12.0538
G2W53_001513	1.1098	0.464459	0.788527	1.02854	2.69977	0.967776	0.134203	0.075951	0.0825831	1.07546	1.09595	0.962552	1.42092	0.884681	1.307	0.0749184	0.273234	0.0513367	0.243352	1.42423	1.43192
G2W53_001514	83.7876	75.0225	81.5268	29.3694	22.9897	22.0288	25.1772	23.8086	25.1844	34.0078	34.3886	32.5329	35.2908	33.0412	35.6568	8.18469	17.4624	8.47575	17.3222	28.2116	29.05
G2W53_001515	0	0	0	0	0	0	0	0	0	0	0	0	0	0	0	0	0	0	0	0	0
G2W53_001516	0	0	0	1.98973	2.44916	1.11902	0	0.0456667	0	0	0	0	0	0	0	0.728773	1.06791	0.702254	1.13737	0.657852	0.652927
G2W53_001517	119.593	133.359	111.806	125.548	135.392	112.311	142.526	145.168	136.065	55.5176	58.0513	87.1253	60.3829	89.4466	61.8605	222.061	168.079	217.462	150.153	184.06	168.936
G2W53_001518	49.7167	46.4706	51.0026	32.8504	31.1281	25.2364	31.0789	36.7127	36.1508	22.9358	23.2096	20.2673	14.1337	20.4062	14.6647	9.63478	10.0967	9.6218	10.4468	12.5491	12.2837
G2W53_001519	0	0	0	0	0	0	0	0	0	0	0	0	0	0	0	0	0	0	0	0	0
G2W53_001520	2.53247	4.58808	1.14906	0	0	0	0	0	0	0.0877325	0.0229341	0.030479	0.0592972	0.0317762	0.0206929	0.0400651	0.0469674	0.041181	0.0488026	0	0
G2W53_001521	0	0	0	0	0	0	0	0	0	0	0	0	0	0	0	0	0	0	0	0	0
G2W53_001522	0	0	0	0	0	0	0	0	0	0	0	0	0	0	0	0	0	0	0	0	0
G2W53_001523	2.82144	2.43105	2.42134	0.889459	1.09082	0.857237	0.316099	0.19877	0.518704	0.187437	0.150763	0.260469	0.051974	0.271555	0.0544118	0.105351	0.108063	0.135356	0.0962447	0.0731528	0.0755094
G2W53_001524	3.19011	3.21735	2.73977	4.30734	6.68693	4.15001	0.0221342	0.0250533	0	3.8288	3.72552	2.36472	3.45045	2.46537	3.61229	4.56556	6.83248	4.29334	7.39525	9.33523	9.30176
G2W53_001525	1.20492	0	0	0.679734	2.87976	0.565777	0.509973	0	1.25526	1.28265	1.34119	3.56482	2.3118	5.57481	1.21012	11.715	9.61329	8.42892	9.98891	1.30154	0
G2W53_001526	1.20492	3.52989	0	1.35947	1.43988	0.565777	2.54986	1.15446	1.25526	3.84795	5.36475	0	1.1559	0	1.21012	1.1715	6.86664	2.40826	7.13494	7.80921	13.4346
G2W53_001527	1.81256	1.95965	2.2609	2.67803	3.22322	3.08016	3.05034	2.48092	3.16963	2.64282	2.71738	1.65265	1.30992	1.65917	1.24669	5.069	6.93266	5.37559	6.90952	7.46416	7.33553
G2W53_001528	0	0	0	0.0307294	0.032547	0	0.0230548	0	0.0283739	0	0	0	0	0	0	0.074618	0	0.0766963	0	0.0414502	0.0427855
G2W53_001529	0	0	0	0.303453	0	0	0.227666	0.257691	0	0	0	0	0	0	0	0	0	0	0	0	0
G2W53_001530	0	0	0	0.0360793	0	0	0	0	0	0	0	0	0	0	0	0.058303	0.0683474	0.0599269	0.071018	0	0
G2W53_001531	6.50449	6.59526	6.76731	3.83247	3.47188	2.78273	2.23297	2.49283	3.486	4.55774	4.65137	3.00634	3.43923	3.1519	3.50308	1.94264	2.70675	1.85982	2.72462	2.71941	2.75609
G2W53_001532	4.51845	4.41236	3.66227	2.549	2.69977	1.1787	1.48742	2.40512	3.66118	8.01656	10.0589	3.71336	1.9265	3.09712	3.52951	1.46438	0.57222	2.50861	0.594578	2.71153	4.47821
G2W53_001533	0	0	0	0	0	0	0	0	0	0	0	0	0	0	0	0	0	0	0	0	0
G2W53_001534	0	0	0	0	0	0	0	0	0	0	0	0	0	0	0	0	0	0	0	0	0
G2W53_001535	80.2943	91.3434	93.4341	21.206	18.7093	16.1532	10.1995	13.1695	15.1765	29.9269	30.3404	17.8241	14.9874	18.136	15.1578	4.25883	6.64317	4.12361	6.83413	8.15385	8.06376
G2W53_001536	18.9664	22.0618	21.8257	11.6436	12.4656	11.6822	29.9845	27.6321	27.1392	9.44326	9.72347	9.56652	11.4334	9.81702	12.1057	7.96657	6.40612	8.56066	7.01731	8.1925	8.64518
G2W53_001537	0.238693	0.419559	0.253262	0	0.0570475	0.0224159	0	0.0228696	0	0.0701054	0.0733049	0.0584525	0.0126356	0.0406268	0.0132282	0.0128061	0.0300247	0.0131628	0.0467967	0.0142275	0.0146859
G2W53_001538	0	0	0	0	0	0	0	0	0	0	0	0	0	0	0	0	0	0	0	0	0
G2W53_001539	0	0	0	0	0	0	0	0	0	0	0	0	0	0	0	0	0	0	0	0	0
G2W53_001540	9.19841	10.4909	8.38155	7.72425	6.58686	7.55028	20.9814	17.0881	21.1039	1.78009	1.80986	1.60732	1.3898	1.65195	1.36212	1.70076	3.57473	1.72503	3.69615	3.9955	4.00393
G2W53_001541	0	0	0	0	0	0	0	0.0110326	0	0	0	0	0	0	0	0.0147149	0	0	0	0	0
G2W53_001542	0	0	0	0	0	0.107155	0	0	0	0	0	0	0	0	0	0	0	0	0.0276334	0	0
G2W53_001543	0	0	0	0	0	0	0	0	0	0	0	0	0	0	0	0	0	0	0	0	0
G2W53_001544	0	0	0	0	0	0	0	0	0	0	0	0	0	0	0	0	0	0	0	0	0
G2W53_001545	0.753076	1.32371	0.449461	4.46075	7.55936	3.21785	0.0318733	0.0360767	0	0.199408	0.241431	0.13126	0.444529	0.121641	0.455478	3.4892	2.95537	3.39918	3.03581	3.63155	3.60563
G2W53_001546	0	0	0	0	0	0	0	0	0	0	0	0	0	0	0	0	0	0	0	0	0
G2W53_001547	0	0	0	0	0	0	0	0	0	0	0	0	0.0232202	0	0	0	0	0	0	0	0
G2W53_001548	21.5164	24.8024	21.2788	8.4439	8.71976	8.25823	13.8976	11.0247	12.5234	6.62934	6.54891	6.03129	4.25789	6.50023	4.40577	2.89363	4.60782	2.87107	4.6045	5.05451	5.06388
G2W53_001549	4.7923	7.52108	4.08601	0.386212	0.409056	0.964392	0.289757	0.655941	0.356609	6.559	5.33426	2.02547	1.31352	0	0.687567	0.665626	0	1.36833	0	2.95804	1.52666
G2W53_001550	0	0	0	0	0.0837138	0.131576	0.0592992	0	0	0	0	0	0	0	0	0	0	0	0	0.0635929	0
G2W53_001551	28.4139	33.0145	30.6016	5.42341	5.87184	8.22583	17.5416	18.1151	20.6985	11.7497	11.2501	7.34174	7.04253	7.33528	7.32094	1.23148	1.35526	1.42078	1.25514	1.25649	1.58518
G2W53_001552	21.2512	22.5151	23.1229	5.47046	4.06815	5.61901	13.0113	14.4307	16.0132	4.98956	4.70503	3.73157	4.25124	4.33725	3.8344	0.613149	0.874195	0.562094	0.645939	0.846906	0.912197
G2W53_001553	51.5007	49.817	54.9341	10.2782	10.4507	12.5475	30.331	27.4649	34.1654	12.9208	13.875	12.652	10.0204	12.3205	9.52182	1.41543	1.94965	1.45485	2.04738	2.43743	2.13044
G2W53_001554	5.02889	4.45656	4.16862	2.58163	2.94466	2.80999	2.02201	1.85503	3.53632	2.89075	3.23731	1.92535	2.20431	2.45335	2.32384	0.874877	1.1538	0.899244	1.33209	1.52741	1.50495
G2W53_001555	7.10218	7.21942	7.99853	4.11018	5.19468	4.25482	4.32751	3.40236	4.24161	4.54898	4.5867	3.61223	3.84324	3.85423	3.602	1.74353	2.21785	1.50612	2.53044	2.9674	2.93537
G2W53_001556	0	0.919243	1.66467	0	0	0	0.531222	1.20256	1.96135	1.33609	0	0	0	0	0	2.44063	1.43055	2.50861	2.97289	0	0
G2W53_001557	0	0	0	0	0	0	0	0	0.541062	0	0	0	0	0	0	0	0	0	0	0	0
G2W53_001558	19.3648	21.1163	20.8321	10.196	9.51348	7.88046	8.74239	6.59689	7.17293	9.41165	10.1895	8.21761	6.45503	8.44668	7.62218	3.34715	6.42075	3.36218	6.11566	6.67671	5.23427
G2W53_001559	25.9951	27.2096	28.4843	14.8534	17.6652	15.8208	8.02735	8.9791	8.13596	11.0281	10.9637	8.15759	6.51341	7.81653	6.75489	5.79553	6.39433	5.54283	7.13494	6.40438	7.00165
G2W53_001560	0	0	0	0	0	0	0	0	0	0	0	0	0	0	0	0	0	0	0	0	0
G2W53_001561	0	0	0	0	0	0	0	0	0	0.0461385	0.0482441	0	0	0	0	0	0	0	0	0	0
G2W53_001562	0.634169	0	0	0	0	0	0	0	0	0	0	0	0	0	0	0	0	0	0	0	0
G2W53_001563	0	0	0	0	0	0	0	0	0	0	0	0	0	0	0	0	0	0	0	0	0
G2W53_001564	0	0	0	0	0	0	0	0	0	0	0	0	0	0	0	0	0	0	0	0	0
G2W53_001565	0	0	0	0.987985	2.19749	3.2894	0	0	0	0	0	0	0	0	0	0.720454	1.15169	0.74052	1.19669	0.291063	0.300439
G2W53_001566	25.7848	34.028	26.5187	8.80259	9.17692	8.60821	3.13921	2.61462	2.8976	25.1084	25.4761	22.038	18.6351	22.2058	19.2418	11.3449	13.6409	11.2118	13.3657	12.9818	12.8432
G2W53_001567	0	0	0	0	0	0	0	0	0	0	0	0	0	0	0	0	0	0	0	0	0
G2W53_001568	0	0	0	0	0	0	0	0	0	0	0	0	0	0	0	0	0	0	0	0	0
G2W53_001569	0	0	0	0	0	0	0	0	0	0	0	0	0	0	0.438449	0	0	0	0	0	0
G2W53_001570	30.3757	34.2032	34.9245	35.1557	42.0669	42.101	16.6426	17.2878	18.4814	18.111	18.0505	12.1225	14.2604	12.1041	14.4769	22.8079	26.8952	22.7679	26.2841	30.0182	30.5409
G2W53_001571	0	0	0	0	0	0	0.196143	0	0	0	0	0	0	0	0	0	0	0	0	0	0
G2W53_001572	77.7625	74.4465	79.8601	44.804	55.1848	50.627	40.663	36.9985	41.0587	38.0791	38.7291	29.0765	30.3362	29.0059	30.7962	19.2003	18.9144	19.4587	19.2604	21.6303	21.073
G2W53_001573	0	0	0	0	0	0	0	0	0	0	0	0	0	0	0	0	0	0	0	0	0
G2W53_001574	1.1282	0.743657	0.822982	19.8892	18.0322	16.6343	0.119376	0.378333	0.440752	0.0567946	0.0593866	0.0789236	0.0204729	0.032913	0.0214332	3.34063	5.9472	3.41234	5.97737	6.96181	6.98382
G2W53_001575	4.42986	7.78652	5.8753	19.9922	24.8802	24.3367	5.6247	8.27643	4.61494	0.372863	0.38988	0.388607	1.17606	0	0.967391	4.93802	5.98835	4.81302	5.49639	4.25647	3.80778
G2W53_001576	0	0	0	0	0.260848	0.204992	0	0	0	1.4095	1.47383	0	0	0	0	0.321841	0	0.661611	0	0	0.369083
G2W53_001577	0	0	0	0	0	0	0	0	0	0	0	0	0	0	0	0	0	0	0	0	0
G2W53_001578	0	0	0	0	0	0	0	0	0	0	0	0	0	0	0	0	0	0	0	0	0
G2W53_001579	3.04273	6.23971	6.4569	3.26135	4.18146	1.28586	1.93172	2.91529	2.85287	0.558429	0.66177	0.206936	0.436147	0.215743	0.456604	0.714054	0.956652	0.803841	1.03545	1.77551	1.55975
G2W53_001580	1.9961	3.45547	3.24911	1.74028	2.06007	1.95977	1.76647	1.65171	1.2288	0.716328	0.6609	0.761213	0.417704	0.671517	0.437296	0.538799	2.70695	0.553805	2.15642	2.09511	1.80953
G2W53_001581	0	0	0.0462408	0	0	0.0327417	0.0295123	0	0	0	0	0	0	0	0	0	0	0	0.0267426	0.0243916	0.0251773
G2W53_001582	0	0	0	0	0	0	0	0	0	0	0	0	0	0	0	0	0	0	0	0	0
G2W53_001583	15.5969	13.6736	15.0052	16.8358	22.7832	18.4074	1.35966	1.94045	1.57635	5.66621	5.68899	1.91952	2.36261	1.91953	2.36705	5.74165	5.38767	5.59723	5.77067	6.35035	6.58445
G2W53_001584	0.533151	1.17142	0.176779	1.05268	0.477836	1.00137	0.564129	1.14935	0.971996	0.567544	0.296723	0	0	0	0.267725	1.03673	2.12684	0.532801	2.20994	4.89516	5.05285
G2W53_001585	1.93861	2.83964	3.16452	4.54277	4.54417	5.81181	5.42793	4.85786	6.83559	1.60789	1.64026	1.85289	1.62571	1.07951	1.25797	1.9342	2.68731	1.65672	2.09423	2.0693	2.21811
G2W53_001586	0.82442	0.836027	0.841096	1.78877	1.13675	0.774221	1.82517	1.64054	3.69972	1.10302	1.09843	0.839383	0.639012	0.684866	0.668984	1.70304	2.27763	1.5779	2.1621	2.29181	2.42065
G2W53_001587	24.9668	32.7946	21.5957	43.1723	40.8614	50.0789	54.6728	57.8528	57.1088	7.38838	7.36017	8.11658	5.44359	9.18528	6.07571	9.43828	13.4696	9.5137	13.2183	11.2964	10.2485
G2W53_001588	0.965482	1.83849	0.640257	101.089	102.453	116.057	2.69697	8.2329	5.63259	0.0400828	0.0419121	0.389902	0.18061	0.406497	0.0756324	22.8077	26.6511	22.9914	25.6858	24.2818	24.3083
G2W53_001589	0.941345	1.37886	0.624251	3.18625	5.06207	4.86214	0	0.450959	0.490337	0	1.0478	4.17752	0.903048	0	0.945405	0	6.43747	1.88145	2.22967	12.2019	7.34707
G2W53_001590	2.36099	3.21983	1.9976	6.47584	6.42108	5.88713	0.999271	0.858041	1.48426	0.227528	0.249807	0.126472	0.133279	0.148336	0.128797	0.800074	1.25461	0.726238	1.29097	1.54688	1.66821
G2W53_001591	0	0	0	0	0	0	0	0	0	0	0	0	0	0	0	0	0	0	0	0	0
G2W53_001592	2.07195	1.9844	1.79679	7.9572	8.09455	8.60639	2.42844	2.48147	2.40758	0.254302	0.341881	0.403869	0.409236	0.34211	0.394157	1.42677	3.22846	1.41535	3.25356	3.39146	3.36754
G2W53_001593	6.66657	5.60587	5.56709	2.22864	2.21293	3.82595	14.0034	8.39819	7.45955	9.22453	8.03793	6.10415	5.73992	7.00033	7.04521	10.03	5.1735	10.9279	6.84172	10.029	8.74171
G2W53_001594	3.88684	2.84669	2.57755	2.19269	3.48358	1.82509	9.0479	8.84462	8.60462	2.89755	2.72681	1.61061	3.65571	0.41979	3.00707	1.32323	0.620479	1.90412	0	1.17609	0.91048
G2W53_001595	12.4072	12.1611	11.6663	7.06895	10.4008	9.68081	25.8644	17.4765	18.7132	15.0782	14.1897	12.9909	15.3275	12.8448	15.2498	12.0639	16.7899	11.494	16.9762	17.1362	16.8038
G2W53_001596	34.9404	35.1163	30.9882	9.83152	10.1591	9.9929	2.21884	3.2038	3.69021	21.1536	20.748	12.562	15.127	12.7066	15.1156	4.47324	5.77385	4.58152	5.90284	5.45439	5.35724
G2W53_001597	6.64479	7.78652	3.52518	4.74814	5.55835	3.5361	2.06239	1.2733	1.84597	1.17829	0.880043	0.701736	0.758465	0.487735	0.873445	0.538092	0.901134	0.553079	1.40452	1.11023	1.146
G2W53_001598	0	0	0	0	0	0	0	0	0	0	0	0	0	0	0	0	0	0	0	0	0
G2W53_001599	0	0	0	0	0	0.132811	0	0	0	0	0	0	0	0	0	0	0	0	0	0	0
G2W53_001600	0.6916	1.23816	0.560552	7.10946	7.07083	4.94333	0.325238	0.533788	0.720495	0.171845	0.179687	0.191041	0.0929181	0.124482	0.113489	3.92384	4.12146	3.72661	4.20602	3.41775	3.49185
G2W53_001601	3.04493	3.6637	2.59616	0.613478	0.779717	0.663817	0	0.104193	0.0566454	0.349294	0.298828	0.441264	0.414934	0.506048	0.449376	0.217518	0.152995	0.238481	0.123646	0.0483323	0.0498893
G2W53_001602	0	0	0	0.239343	3.042	0.796868	0	0	0	0	0	0.627609	0	0.654321	0	6.60001	3.86853	6.35985	4.01968	5.04116	4.25745
G2W53_001603	0	0	0	0	0	0	0	0	0	0	0	0	0	0	0	0	0	0	0	0	0
G2W53_001604	27.4233	38.296	28.3622	0	0	0	0	0	0	3.21728	3.02979	7.41437	7.41947	8.01944	7.39042	0.036503	0	0	0	0	0
G2W53_001605	20.9895	23.7985	14.7345	2.52671	3.67316	3.21651	0	0.042072	0	5.10724	5.39192	5.1086	7.38188	5.18304	7.68157	1.08166	1.2416	1.13495	1.34501	1.32691	1.24044
G2W53_001606	0.421301	0.848532	1.25723	0	0.0629317	0	0.0891561	0.100914	0	0	0.210217	0.419062	0.0905878	0.436897	0.189674	0	0	0	0	0.102001	0.105287
G2W53_001607	98.691	98.8919	105.321	40.6319	42.1949	39.3237	16.4203	21.253	23.7193	21.2457	20.814	21.8017	22.8155	21.5053	23.1769	6.11219	8.36243	6.05004	8.6227	8.92135	9.02099
G2W53_001608	8.62393	7.38359	7.41046	5.89285	9.50726	6.33077	0.976762	0.465506	1.01231	2.7756	2.95441	5.72786	4.82291	5.34558	5.33138	0.910809	0.907564	0.764544	0.832081	0.978175	0.905236
G2W53_001609	6.63054	8.54827	6.29088	7.98533	7.21126	7.12468	5.47601	5.66283	7.25683	3.19863	3.16692	2.23635	3.04469	2.26636	3.1262	1.23249	2.99666	1.25274	2.93582	3.12908	3.26129
G2W53_001610	0.515413	1.09051	1.17729	0	0.0342176	0.053781	0.0242383	0	0	0.0157703	0	0.0219149	0.0142119	0.0228476	0.029757	0	0.0168852	0	0.0175449	0	0
G2W53_001611	0	0	0.178357	0.151726	0	0	0.113833	0	0	0	0	0	0	0	0	0	0	0	0	0	0
G2W53_001612	0.463431	0.339413	0.26342	0	0	0.0310866	0	0	0	6.19569	6.37954	3.74622	10.8259	3.32323	10.7313	0	0	0	0	0	0
G2W53_001613	0	0	0	0	0	0	0	0	0	0	0	0	0	0	0	0	0	0	0	0	0
G2W53_001614	4.26043	3.99925	1.83047	0	0.0717071	0	0.0253971	0	0	0	0	0	0	0	0	0	0	0	0	0	0
G2W53_001615	1.08878	0.53161	0.48135	0	0	0	0	0	0	0	0	0	0	0	0	0	0	0	0	0	0
G2W53_001616	65.3067	76.1133	61.0068	0.0679734	0.215982	0.198022	5.6862	2.59752	10.5756	2.32628	2.09858	0.0633859	0.041106	0.132167	0	0.249965	0.0976762	0.256927	0.101493	0	0.191104
G2W53_001617	0	0	0	0	0	0	0	0	0	0	0	0	0	0	0	0	0	0	0	0	0
G2W53_001618	0	0	0	0	0	0.0689971	1.30603	2.1822	7.1948	0	0	0	0	0	0	0	0	0	0	0.51854	0.802867
G2W53_001619	0	0	0	0	0	0	2.47527	4.37526	8.38789	0	0	0	0	0	0	0	0	0	0.0773295	0.141062	0
G2W53_001620	0	0	0	0	0	0	0	0	0	0	0	0	0	0.474856	0	0	0	0.461549	0	0	0
G2W53_001621	114.164	121.433	98.8729	101.674	82.43	88.67	102.959	100.53	130.273	27.8536	28.1386	26.94	29.0675	27.5704	29.1259	7.00604	18.7374	7.06345	18.9565	23.7339	23.796
G2W53_001622	0	0	0	0	0	0	0	0	0	0	0	0	0	0	0	0	0	0	0	0	0
G2W53_001623	0	0	0	0	0	0	0	0	0	0	0	0	0	0.0210497	0	0	0	0	0	0	0
G2W53_001624	0	0	0	0.13929	0.442586	0.115938	0.209005	0.354853	0.257226	0	0	0	0	0	0	0.210198	0	0.216052	0	0	0
G2W53_001625	0	0	0	0	0	0	0	0	0	0	0	0	0	0	0	0	0	0	0	0	0
G2W53_001626	0	0	0	0	0	0	0	0	0	0	0	0	0	0	0	0	0	0	0	0	0
G2W53_001627	0	0	0	0	0	0	0	0	0	0	0	0	0	0	0	0	0	0	0	0	0
G2W53_001628	0	0	0	0	0	0	0	0	0	0	0	0	0	0	0	0	0	0	0	0	0
G2W53_001629	0.120976	0.354407	0.080225	0	0	0	0	0	0	0	0	0.0319047	0	0.0332626	0	0	0	0	0	0	0
G2W53_001630	0	0	0	0	0	0	0	0	0	0	0	0	0	0	0	0	0	0	0	0	0
G2W53_001631	0	0	0	0.17165	0	0	0	0	0	0.758964	0.595201	0	0	0.274892	0.179012	0	0	0	0	0.192535	0.198737
G2W53_001632	0.060488	0.0886017	0.0401125	0	0	0	0	0	0	0	0	0	0.0339971	0	0	0	0	0	0	0	0
G2W53_001633	1.46544	2.38506	0.971807	0	0	0.229369	0.0689152	0.0780037	0	1.21332	1.08745	0.481733	0.468608	0.502235	0.16353	0	0	0	0	0	0
G2W53_001634	1.77542	1.38699	1.8053	2.13669	2.36915	2.02857	0.125239	0.170106	0.0308267	1.86638	1.81216	0.703973	0.648753	0.811191	0.729492	0.292226	0.0856427	0.275335	0.029663	0.108221	0.0837803
G2W53_001635	38.8767	40.541	43.0253	14.6695	8.46082	12.2101	17.1081	14.554	14.4838	35.21	35.0637	29.4156	20.776	27.9348	21.7505	10.7196	29.6208	11.6085	22.1509	19.1402	18.6592
G2W53_001636	0	0	0	0	0	0	0	0	0.104605	0	0	0	0	0	0	0	0	0	0	0	0
G2W53_001637	0	0	0	0	0	0	0	0	0	0	0	0	0	0	0	0	0	0	0	0	0
G2W53_001638	44.9455	53.9727	45.2235	0	0	0.0561286	0.227666	0.114529	0.24906	4.39894	4.49897	7.13916	2.37276	6.88478	2.60523	0	0.034379	0	0.0357223	0	0
G2W53_001639	0.590648	0.216292	0.156675	0.0999608	0.0705823	0.110937	0	0	0.338429	0.825976	0.863672	2.14257	1.68721	2.23375	1.50659	0.301761	0.117916	0.310165	0.122523	0.111752	0.115352
G2W53_001640	0.0557834	0	0	0	0	0.0261934	0	0	0	0	0	0	0	0	0	0	0	0	0	0	0
G2W53_001641	0	0	0	0	0	0	0	0	0	0	0	0	0	0	0	0	0	0	0	0	0
G2W53_001642	0	0	0	0	0	0.0279534	0	0	0	0	0	0	0	0	0	0	0	0	0	0	0
G2W53_001643	0.238127	0.261603	0.197392	0	0	0	0.352748	0.34223	0.0620189	0.0371854	0.0388825	0.0516741	0.201065	0.0538733	0.210496	0.0679263	0	0	0	0	0
G2W53_001644	30.123	28.0787	27.24	13.9036	9.81735	6.42928	13.9083	15.0866	17.1172	137.01	121.926	129.63	85.379	120.365	92.134	50.5876	42.1362	43.7866	34.0531	53.2446	62.5932
G2W53_001645	35.8494	28.7459	31.2892	1.95171	1.71075	1.82057	1.91871	1.45736	1.83318	99.5752	100.139	79.9969	51.58	79.277	51.1573	0.423289	0.0708875	0.341847	0.0368287	0.235136	0.138692
G2W53_001646	33.7678	34.0741	28.0802	13.6672	11.4652	8.50678	18.5568	17.1011	22.894	19.7797	20.5556	25.1679	22.4181	25.2282	23.1262	3.29727	6.72372	3.58847	6.58142	7.51123	7.27656
G2W53_001647	0	0	0	0	0	0	0	0	0	0	0	0	0	0	0	0	0	0	0	0	0
G2W53_001648	4.91237	10.6576	3.74935	45.7513	77.1442	37.2542	0.0392287	0	0.0482793	4.3156	4.43051	8.17786	12.1624	8.29856	13.103	104.346	116.694	100.623	116.888	89.1753	89.2537
G2W53_001649	0	0.0606094	0	0.233425	0.148339	0.155433	0.0700512	0.0396448	0.0431066	0	0.0171041	0.022731	0.0147411	0.0473968	0.0154326	0.0149401	0	0.0153562	0	0.116189	0.154198
G2W53_001650	18.7637	18.1884	17.2007	14.3471	15.5529	12.1793	31.2212	23.045	27.4768	7.75588	7.82608	8.85251	9.96289	8.85679	9.85074	6.3402	8.67123	6.16816	8.53332	9.18901	9.21574
G2W53_001651	51.6395	43.2232	54.2206	45.778	49.2203	54.8457	61.4049	53.8942	49.6341	19.677	18.2889	12.7052	17.9117	10.9423	16.6891	9.43979	12.9814	8.76976	10.3928	12.5044	14.9891
G2W53_001652	110.775	74.0138	108.902	7.12624	5.22536	6.61594	1.02817	0.465506	1.26539	19.6535	18.3872	17.2491	2.79653	15.7354	3.41566	2.3619	3.32257	4.36983	2.87699	4.1985	3.79203
G2W53_001653	0.542757	0.198755	1.07979	0.306186	0	0	0	0	0	0.288885	0.604138	0	0.260338	0	0.272549	0	0	0	0	0	0
G2W53_001654	12.368	15.4783	14.2897	11.7605	10.7419	9.42961	1.96974	2.13788	2.93891	2.47066	2.72322	2.90821	3.73006	2.91408	3.65273	2.75566	3.87773	2.61957	3.86109	3.7812	3.73861
G2W53_001655	0	0	0	9.41029	21.6756	12.3193	0.479813	0.387922	0.253077	0.0631847	0.0330341	0	0	0	0	8.71413	8.21967	8.71957	8.18936	6.28327	6.02242
G2W53_001656	0	0	0	0	0	0	0	0	0	0	0	0	0	0	0	0	0	0	0	0	0
G2W53_001657	0	0.108679	0	0.502266	1.68459	1.25418	0	0	0	0	0	0.0213173	0	0.0222246	0	0.15412	0.558441	0.144012	0.563195	1.22972	1.17293
G2W53_001658	0	0	0	0	0	0	0	0	0	0	0.0505726	0	0	0	0	0	0	0	0	0	0
G2W53_001659	0	0	0	0	0	0	0	0	0	0	0	0	0	0	0	0	0	0	0	0	0.0237082
G2W53_001660	0	0	0	0	0	0	0	0	0	0	0	0	0	0	0	0	0	0	0	0	0
G2W53_001661	15.1047	15.1082	17.7437	22.0573	23.7745	21.399	4.60291	6.16095	5.17032	5.36597	5.22054	1.81555	1.63994	1.84775	1.5261	7.03185	7.39399	6.93568	7.57907	8.9645	8.78084
G2W53_001662	13.1968	12.6068	16.3613	10.5197	12.5132	11.0461	6.92106	6.18458	5.82801	9.72646	9.89171	6.85068	7.56459	7.72135	7.29088	4.86774	5.70635	7.75514	7.41164	4.46163	4.18669
G2W53_001663	0	0.95921	0	0	0	0	0	0	0	0	0	0	0	0	0	0	0	0	0	0	0
G2W53_001664	0	0.408552	0	0	0	0	0	0	0	0.0425941	0.022269	0	0	0	0	0	0	0	0	0	0
G2W53_001665	0	0.198755	0	0	0	0	0	0	0	0	0	0	0	0	0	0	0	0	0	0	0
G2W53_001666	0	0	0	0	0	0	0	0	0	0	0	0	0	0	0	0	0	0	0	0	0
G2W53_001667	0	0	0	0	0	0	0	0	0	0	0	0	0	0	0	0	0	0	0	0	0
G2W53_001668	0	0	0	0	0.102848	0.0808252	0	0	0	0	0	0	0	0	0	0.0154933	0	0.0159249	0	0	0
G2W53_001669	0.759404	0.55618	0.335732	0	0	0	0	0	0	0	0.342722	0	0	0.949712	0	0	0	0	0.182324	0	0
G2W53_001670	0	0	0	0	0	0	0	0.424432	0	0	0	0	0	0	0	0	0	0	0	0	0
G2W53_001671	0	0.456451	0	0	0	0	0	0	0	0	0	0	0	0	0	0.0260257	0	0	0	0	0
G2W53_001672	0.481968	0.176495	0	0	0	0	0	0	0	0.0136008	0.0284431	0	0	0	0	0	0	0.0127683	0	0.0552044	0.0284914
G2W53_001673	0	0	0	0	0	0	0	0	0	0	0	0	0	0	0	0	0	0	0	0	0
G2W53_001674	182.29	175.737	183.299	135.728	152.485	152.614	108.725	116.313	112.058	51.2822	51.1886	32.7105	41.1843	32.7262	40.9199	25.1005	26.2713	24.5063	25.5536	31.7189	31.3972
G2W53_001675	47.1417	39.1379	38.4849	23.6179	29.7941	32.7639	30.6848	26.8232	28.9881	11.2573	11.5417	10.1073	12.22	10.008	11.2069	6.30929	6.06571	5.97033	5.53012	8.97525	9.95347
G2W53_001676	3.94387	3.03786	3.83287	2.80026	3.20966	2.61815	1.09362	1.303	0.920904	0.792121	0.920302	0.815375	1.26906	0.892582	1.21787	1.2058	1.28789	1.29447	1.27293	1.25033	1.19842
G2W53_001677	0.108356	0	0	0	0	0	0	0	0	0	0	0	0	0	0	0	0	0	0	0	0
G2W53_001678	0	0	0	0	0	0	0	0	0	0	0	0	0	0	0	0	0	0	0	0	0
G2W53_001679	0	0	0	0	0	0	0	0	0.0620189	0	0.0078813	0.0104741	0	0.0109199	0	0	0	0	0	0	0
G2W53_001680	9.92425	13.1259	11.6914	12.5145	13.9523	10.9373	3.87915	3.63564	5.26067	5.29735	5.2034	2.6363	3.43246	2.76965	3.48331	3.46546	4.15623	3.49348	4.48098	5.36054	5.57908
G2W53_001681	0	0	0	0	0	0	0	0	0	0	0	0	0	0	0	0	0	0	0	0	0
G2W53_001682	5.93666	3.86484	5.68661	8.93081	3.54715	14.0412	9.30607	15.8	17.1797	2.80058	2.67252	1.24688	0.906621	1.26056	0.820883	0.49668	0.815147	0.459462	0.756247	1.24157	1.31005
G2W53_001683	68.4735	52.4819	57.1121	200.551	82.3807	240.268	369.674	447.733	506.529	209.503	209.882	137.706	134.477	139.061	135.405	35.8691	43.028	36.8682	41.6902	61.2918	61.2862
G2W53_001684	0.152137	0	0.100889	0.085825	0	0	0.0643905	0	0	0	0	0.60764	0.131352	0.211167	0.137513	0	0	0	0	0	0
G2W53_001685	10.5751	11.5942	13.3032	26.4301	30.7123	26.7841	8.59901	11.9437	12.6862	2.78889	2.90355	2.29848	1.49057	2.32634	1.44658	6.21919	6.65723	6.32441	6.56812	7.35054	7.44823
G2W53_001686	0.198178	0	0	0	0	0	0	0	0	0	0	0	0	0	0	0	0	0	0	0	0.0203678
G2W53_001687	0	0	0	0	0	0	0	0	0	0	0	0	0	0	0	0	0	0	0	0	0
G2W53_001688	0.0418375	0.0612828	0	0.684454	0.724939	0.451835	1.31035	1.14243	0.937089	0.00415402	0.00868719	0	0	0.00601823	0	0.0531167	0.0756107	0.0584959	0.087808	0.0885188	0.0913704
G2W53_001689	0	0	0	0	0	0	0	0	0	0	0	0	0	0	0	0	0	0	0	0	0
G2W53_001690	0	0	0	0.878966	1.55159	0.243869	0	0	0	0	0	0	0	0	0	0	0	0.0774859	0	0	0
G2W53_001691	0	0	0	0	0	0	0	0	0	0	0	0	0	0	0	0	0	0	0	0	0
G2W53_001692	0	0	0	0	0.0228407	0	0	0	0	0	0	0	0.0197477	0	0	0	0.0234623	0	0.0243791	0	0
G2W53_001693	24.87	24.286	26.2355	21.3922	19.1755	21.6598	20.2877	16.436	19.6669	7.92023	8.13247	6.56406	6.3145	6.94681	5.95096	5.52645	6.52438	5.17128	6.43002	7.5445	7.39891
G2W53_001694	1.74775	3.61422	2.45439	5.85777	4.97569	5.21364	5.09103	3.89087	6.47981	0.611362	0.656541	0.321458	0.253139	0.311201	0.187067	0.724392	1.41532	0.744568	1.47062	1.79403	1.95566
G2W53_001695	0	0	0	0	0	0.0568049	0	0	0	0	0	0	0	0	0	0	0	0.00483018	0	0	0
G2W53_001696	0	0.0284302	0	0	0	0.0182273	0	0	0	0	0	0	0	0	0	0	0	0	0	0	0
G2W53_001697	0	0	0	0	0	0	0	0	0	0	0	0	0	0	0	0	0	0	0	0	0
G2W53_001698	0	0.027406	0	0	0	0	0	0	0	0	0	0	0	0	0	0	0	0	0	0	0
G2W53_001699	0.136923	0.100281	0.0908001	0.61794	0.65449	0.578635	0.0579515	0	0	0.0775171	0.0810548	0	0	0	0	0.353999	1.24496	0.363859	1.20736	1.57317	1.70504
G2W53_001700	21.6458	21.881	23.5237	16.7148	18.3919	17.0429	18.497	15.5347	16.1624	8.04628	7.33591	7.93162	6.14385	7.75236	6.39463	14.0826	14.8961	13.5446	14.1552	14.6805	14.9043
G2W53_001701	0.256366	0	0.425022	2.16936	1.99132	1.44454	3.85192	5.64946	4.07293	0.239598	0.250533	0.332953	0	0.173562	0	5.79915	5.13074	5.62328	5.19793	4.25471	4.64273
G2W53_001702	6.79154	11.1663	8.30292	21.6066	17.5292	14.882	0.175988	0.199197	0.433181	0.998438	0.894861	1.38746	1.31396	1.58428	1.34568	7.81645	11.6574	7.7961	11.4429	11.1284	11.3209
G2W53_001703	14.7192	25.8224	12.485	41.1316	26.7932	23.9491	0	0.983911	0.356609	1.27415	1.3323	1.47551	1.53099	1.5383	2.80491	12.6072	21.8277	12.3603	18.1917	21.3331	22.9101
G2W53_001704	122.276	116.841	123.142	158.53	207.456	172.99	246.263	229.847	200.367	36.6767	37.3755	31.0446	36.2386	30.6772	36.6554	48.1186	53.2054	48.4011	52.4314	66.7852	66.5763
G2W53_001705	60.3906	58.3491	49.7004	5.22036	5.61553	5.81618	1.12194	1.22372	1.40589	9.4403	8.26171	12.263	22.1933	11.8929	23.0407	5.95123	5.98771	5.6835	6.22167	5.15408	5.1589
G2W53_001706	3.81768	3.10244	3.25998	0.50154	0.624947	0.564794	0.0885369	0.275586	0.29965	2.6775	3.94957	8.10589	7.19566	6.51134	6.08969	0.698709	1.33101	0.71817	1.22344	0.97033	1.00159
G2W53_001707	0	0	0	0	0	0	0	0	0	0	0	0	0	0	0	0	0	0	0	0	0
G2W53_001708	0	0	0	0	0	0	0	0	0	0	0	0	0	0	0	0	0	0	0	0	0
G2W53_001709	2.78998	1.91564	1.64781	2.11495	3.02145	2.08789	0.0369011	0.104419	0.158952	0.777049	0.771886	2.37559	2.55596	2.25154	3.11571	3.19372	4.15992	3.90273	4.53858	5.04634	4.80196
G2W53_001710	0.0660593	0.0725718	0.0219035	0	0	0	0	0	0	0.309411	0.529416	0.508143	0.177441	0.285261	0.291915	0	0	0	0	0	0
G2W53_001711	0.69488	0.636154	0.55297	0.117601	0.145316	0.0652568	0.0147051	0.0332888	0	0.125078	0.101722	0.212437	0.0876695	0.241613	0.144228	0.0634662	0.2232	0.0913275	0.123691	0.084613	0.0873387
G2W53_001712	0.728783	1.06751	1.12768	0.342608	0.217724	0.171102	0	0	0.0632693	0.375044	0.0980399	1.43322	0.760461	1.35838	0.619213	0.428181	0.301168	0.264064	0.208624	0	0.294619
G2W53_001713	0.0345844	0	0	0	0	0	0	0	0	0.085333	0.0892274	0.316217	0.0256335	0.329675	0.0536717	0.0259795	0	0.0267031	0	0.0577263	0.0297929
G2W53_001714	3.60167	4.3644	3.03983	0.812725	1.40858	0.768718	0.194011	0.219598	0.238773	0.449752	0.436686	2.8571	0.607963	2.83907	0.666788	0.469462	0.791114	0.407141	0.982856	0.505271	0.588845
G2W53_001715	0.275096	0.201478	0.0912147	0.15519	0	0	0	0	0	0.0904973	0.189255	0	0	0.393331	0.08538	0.165311	0.290686	0.0849575	0.302043	0.18366	0.473941
G2W53_001716	1.11019	1.35515	0.981623	1.29433	1.41511	1.07734	1.1277	0.709125	1.34933	1.38452	1.34047	1.42517	1.43255	1.56012	1.01596	0.889867	2.19615	0.962791	2.56721	3.48626	3.33001
G2W53_001717	0	0	0	0	0	0	0	0	0	0	0	0	0	0	0	0	0.0318785	0	0.165621	0	0.0311853
G2W53_001718	0	0	0	0	0	0	0	0	0	0	0	0	0	0	0	0	0	0	0	0	0
G2W53_001719	48.4279	51.022	50.0874	58.8	61.6939	74.6024	24.2576	30.777	32.9553	17.6483	17.3836	10.3613	10.7472	10.9233	10.936	26.7632	32.0001	26.1557	32.0189	31.5564	32.0042
G2W53_001720	20.7584	22.1761	14.6974	6.42753	6.06166	5.34996	3.23687	3.73852	3.25198	8.00588	7.43367	5.34011	10.9664	4.82507	10.6349	2.0474	2.81157	2.16455	2.20889	4.28935	4.42753
G2W53_001721	17.4908	15.6568	13.5321	4.65947	5.22536	5.93153	3.49578	4.88782	3.29	5.17197	5.94881	10.062	6.05916	7.49303	8.78312	1.41714	3.87633	1.94215	4.02779	2.62406	2.16688
G2W53_001722	11.4844	12.4787	11.1117	6.10698	6.74943	7.64682	6.81292	6.71929	6.52148	6.51629	6.14816	3.53787	3.08641	3.77626	3.77447	2.7682	4.34844	2.61768	4.04628	4.39791	4.44435
G2W53_001723	0	0	0	0.031353	0	0	0	0	0	0	0	0	0.00907016	0	0	0.00919258	0.0538813	0.00944861	0.123171	0.0102129	0.0421677
G2W53_001724	233.486	231.601	231.757	0.0367821	0.116873	0.122462	0	0	0	18.5473	18.5393	49.2319	53.1667	47.9314	52.7085	0.0491017	0.0345366	0.0504693	0.035886	0	0
G2W53_001725	2.09349	0.766627	2.08244	0.164028	0.243223	0.0819175	0	0	0	0.229898	0.259622	0.651727	1.12706	0.639497	1.16257	0.00839907	0.108307	0	0.0409231	0.0186627	0.0288958
G2W53_001726	0.329213	1.3864	0.327476	51.4443	68.3057	55.9207	0.348342	2.28683	1.41474	0	0	0	0.0384617	0	0.0402657	36.2521	44.5083	35.579	44.538	42.3548	42.691
G2W53_001727	0	0.0492451	0	0	0	0	0	0	0	0	0	0	0	0	0	0.0530572	0	0	0	0	0
G2W53_001728	0	0	0	0	0	0	0	0	0	0	0	0.0256192	0	0	0	0	0	0	0	0	0
G2W53_001729	0	0	0	0	0	0	0	0	0	0	0	0	0	0	0	0	0	0	0	0	0
G2W53_001730	0.116305	0.127771	0	0	0	0	0	0	0	0	0	0	0	0	0	0	0	0	0	0	0
G2W53_001731	0.0581526	0.127771	0.0385638	0	0	0	0	0	0	0	0	0	0	0	0	0	0	0	0	0	0
G2W53_001732	2.31716	3.39413	4.60985	7.84308	3.46125	4.35213	1.96143	3.33016	5.43143	1.23332	2.5792	1.71386	5.55722	3.5736	1.16358	3.37933	14.5256	8.10473	10.9768	13.7662	10.3343
G2W53_001733	1.60007	1.83424	1.52242	2.74719	3.07595	2.77662	1.0011	1.13313	0.978409	0.0344038	0.0359739	0.0637448	0.0981796	0.0581506	0.0919653	0.246143	0.472729	0.226084	0.459303	0.523655	0.498484
G2W53_001734	0.175134	0.384799	0.696838	1.18558	1.46499	1.23352	0.148248	0.167799	0	0.130292	0.136238	0.0603525	0.0391389	0	0.0819493	0.476005	1.06952	0.407719	0.434861	1.05768	1.00077
G2W53_001735	0.305507	0.581752	0.364674	1.75793	1.53334	1.06155	0.181025	0.234169	0.381926	0.0754647	0.0591816	0.0262171	0.0850094	0.0728876	0.0652643	0.160826	0.370333	0.165305	0.307842	0.357354	0.349106
G2W53_001736	0	0	0	0	0	0	0	0	0	0	0	0	0	0	0	0	0	0	0	0	0
G2W53_001737	0.166426	0.0406295	0.0735765	0.281658	0.629781	0.208389	0.0234794	0.0531517	0.0288965	0.0492821	0.0309187	0	0.00888244	0.0142797	0.0464953	0.0720186	0.0738727	0.0647714	0.120621	0.13002	0.154856
G2W53_001738	0	0	0	0	0	0	0	0	0	0	0	0	0	0	0	0	0	0	0.107454	0	0
G2W53_001739	0	0	0	0	0	0	0	0	0	0	0	0	0	0	0	0	0	0	0	0	0
G2W53_001740	4.42986	2.55225	1.72342	0.0333203	0.0352911	0	0	0.0848864	0.0615325	0.356116	0.248245	0.26393	0.08558	0.275163	0.0895942	0.0216838	0.0508389	0	0.0264127	0.0481812	0.0497333
G2W53_001741	0	0.114905	0.104042	0.796563	0.374968	0.294675	0.0664027	0.0751599	0.0817228	0	0	0.0468891	0.0304078	0.0488847	0.0318341	0.308182	0.325148	0.190059	0.300313	0.376628	0.282735
G2W53_001742	3.13188	5.2131	3.54962	5.49312	5.68194	6.09627	1.66295	1.93682	2.07629	1.69141	1.95283	0.783477	2.03235	0.765771	1.82848	3.2506	5.16884	3.10957	5.01798	5.18469	5.01953
G2W53_001743	923.074	843.721	831.09	16.3284	17.4507	20.7246	27.6051	25.8498	24.0819	614.997	613.096	826.649	392.349	811.057	393.015	15.9581	16.4099	15.9229	16.8238	12.7527	13.4311
G2W53_001744	0	0	0	0	0	0	0	0	0	0	0	0	0.213004	0	0	0	0.25307	0	0	0	0
G2W53_001745	0	0	0	0	0.232238	0.182509	0	0	0	0	0	0	0	0	0.0395177	0	0	0	0.0155332	0	0
G2W53_001746	0.16735	0	0	0	0	0	0	0	0	0	0	0	0	0	0	0	0	0	0	0	0
G2W53_001747	0.0667916	0.0489176	0.0442927	0	0	0	0	0	0	0	0.06966	0	0	0	0	0	0	0	0	0	0
G2W53_001748	0.264237	0	0	0.447193	2.36822	1.36481	0	0.50634	0.412915	0	0	0.0667403	0.0432814	0	0	0.175462	0.205691	0.0901746	0.213728	0.43861	0.402435
G2W53_001749	0	0	0	0	0	0	0	0	0	0	0	0.0975061	0	0	0	0	0.0751273	0	0.0780628	0.0712	0.0734936
G2W53_001750	14.8166	14.5285	15.5098	12.1578	14.7792	10.1771	5.44178	6.68739	8.86593	1.9667	1.89517	1.57549	1.33448	1.5308	1.37524	0.669202	1.06526	0.68784	1.06398	1.35392	1.34099
G2W53_001751	0	0	0	0	0	0	0	0	0	0	0	0	0	0	0	0	0	0	0	0	0
G2W53_001752	0	0.538093	0	9.53285	5.70683	8.27966	0.621918	2.11181	1.53081	0	0	0	1.40964	0	0	6.42898	9.21135	8.07649	13.9218	2.38086	7.37266
G2W53_001753	922.748	871.967	941.048	41.0383	35.1399	37.2373	0.693841	2.35603	2.6685	0	0	0.022184	0.0575457	0.0231282	0.0753061	0.408257	0.786256	0.329707	0.728176	0.518368	0.501625
G2W53_001754	0	0	0	0	0	0	0	0	0	0.175946	0.045994	0	0	0	0	0	0	0	0	0	0
G2W53_001755	319.785	211.163	328.208	0.0522069	0	0	0	0.022167	0.0241026	184.871	186.321	24.8921	5.51469	25.442	5.75123	0.0428285	0	0.0440214	0	0	0
G2W53_001756	0	0	0	0	0	0	0	0	0	0	0	0	0	0	0	0	0	0	0	0	0
G2W53_001757	0	0.832522	0.376906	0	0	0	0	0	0	0	0	0	0	0	0	0	0	0	0	0	0
G2W53_001758	0.700536	0.872212	2.09051	0.197597	0	0	0	0	0.0364902	0	0.0299907	0	0	0	0.0541198	0	0	0.026926	0	0	0.0300417
G2W53_001759	0	0	0	0	0	0	0	0	0	0.460281	0.481287	0	0	0.222281	0	0	0	0	0	0	0
G2W53_001760	27.5742	45.3964	34.6507	6.43786	13.5335	9.13947	0	0.0277513	0	1.98742	1.73843	3.05389	1.85991	2.63015	1.71277	2.16428	1.63686	2.1528	1.78586	3.31589	3.10246
G2W53_001761	16.3764	17.2905	17.479	4.99011	6.10663	6.95995	4.17388	4.38075	4.79441	29.8203	29.7462	15.5181	11.4128	16.9016	12.3013	11.8518	7.88194	11.1277	7.21822	12.281	12.3499
G2W53_001762	0	0.161035	0.14581	0	0	0	0	0	0.114531	0.0710653	0.0743085	0.0329182	0	0.0343192	0	0	0	0	0.0263541	0	0.0248116
G2W53_001763	0	0.264742	0.0799041	0.20392	0.215982	0.0565777	0	0	0	0	0	0	0	0	0	0.0826554	0	0.0849575	0	0	0
G2W53_001764	4.39165	6.61402	3.73269	1.77959	1.81094	1.51029	2.46085	3.08171	2.70642	2.74688	2.71042	0.134407	0.26149	0.224203	0.219004	1.69612	1.01488	1.68888	1.05453	0.824419	0.74967
G2W53_001765	0.720072	0.922905	0.955029	1.92952	2.36633	1.46516	0.43175	0.344957	1.18775	0.422767	0.361686	0.213633	0.0692709	0.334088	0.0725201	1.72004	1.85177	1.73187	1.92412	1.79397	1.85176
G2W53_001766	0	1.65464	0	0	0	0.35361	0	0	0	0	0	0	0	0	0	0	0	0	0	0	0
G2W53_001767	0.436566	0.559539	0.289508	1.16983	1.69551	1.43494	0.0461932	0.365996	0.113701	0	0	0	0	0	0.0491785	0.57131	0.586018	0.587222	0.492931	1.16366	1.20115
G2W53_001768	0	0	0	0.111798	0.236822	0.0930554	0.0838771	0	0	0	0	0	0	0	0	0.0233833	0.0274117	0.0240346	0.0284828	0.0129894	0.0134078
G2W53_001769	0	0	0	0.0178502	0	0	0.0133921	0.0303166	0	0.0374241	0.019566	0.0260029	0	0.0271096	0	0	0	0	0.0208178	0	0
G2W53_001770	98.5441	92.152	140.304	9.07314	7.99047	12.0165	14.9682	11.7276	11.9648	132.981	128.979	76.4022	83.1971	76.7864	90.4456	6.2967	7.5095	6.23514	7.56646	7.5213	7.29054
G2W53_001771	6.01731	8.17302	8.24676	3.82659	3.26849	3.93852	11.0823	7.45993	8.81419	16.5391	15.2637	9.88502	10.0372	10.766	11.7237	3.17595	4.34677	2.63473	4.35951	5.23002	5.67582
G2W53_001772	0	0.408552	0	0.629383	0.66661	0.261934	0	0	0	0.0199479	0.0104291	0	0.0179767	0	0.0188199	0	0	0	0	0	0
G2W53_001773	9.90889	13.8612	10.6123	34.0426	32.2078	28.7076	5.03263	7.80871	7.32925	39.35	38.8238	44.4368	31.1389	43.8186	30.0016	46.0812	48.4564	45.3634	50.8438	42.7235	42.5182
G2W53_001774	0	0	0	0	0	0	0	0	0	0	0	0	0	0	0	0	0	0	0	0	0
G2W53_001775	80.533	76.0908	74.6043	40.5759	42.2413	39.5466	39.0285	40.0525	38.7466	8.83817	8.32105	7.43758	6.63204	7.295	5.71396	3.5055	4.48644	3.53703	3.76073	4.21617	4.16759
G2W53_001776	40.9888	33.8019	38.1685	16.6899	15.363	15.0537	8.60579	9.99841	10.199	9.34043	9.49616	6.29213	5.50281	6.3725	5.63887	4.06465	4.93113	3.86209	4.95109	5.74979	6.15182
G2W53_001777	0	0	0	0	0	0	0	0	0	0	0	0	0	0	0	0	0	0	0	0	0
G2W53_001778	0	0	0	0	0	0	0.147676	0	0.0605822	0.0779568	0.0815146	0	0	0	0	0	0	0	0	0	0
G2W53_001779	0	0	0	0	0	0	0	0	0	0	0	0	0	0	0	0	0	0	0	0	0
G2W53_001780	0	0	0	0	0	0	0	0	0	0	0	0	0	0	0	0	0	0	0	0	0
G2W53_001781	0	0	0	0	0.0497196	0	0.0528287	0	0.0216724	0.0483897	0.0843301	0	0.0581439	0	0.0608712	0.0736609	0.0172702	0.0454275	0.017945	0.0327348	0
G2W53_001782	6.95147	7.29737	9.37337	3.92154	3.18435	3.59051	9.31681	6.2163	7.3626	10.525	11.2255	8.77554	8.63132	11.2838	8.83757	4.22971	6.42339	4.24871	7.14274	5.7672	5.95298
G2W53_001783	3.12355	3.32181	2.78075	3.04142	2.14755	2.95345	5.57783	4.53009	6.08464	2.45963	2.23849	1.13932	2.01133	1.05584	2.27757	2.08008	3.51135	2.13802	3.64855	5.45388	5.96353
G2W53_001784	0	0	0	0	0	0	0	0	0	0	0	0	0	0	0	0	0	0	0	0	0
G2W53_001785	0	0	0	0	0	0	0	0	0	0	0	0	0	0	0	0	0	0	0	0	0
G2W53_001786	0	0	0	0	0	0	0	0	0	0	0	0	0	0	0	0	0	0	0	0	0
G2W53_001787	0	1.42334	0.644388	0	0	0	0	0	0	0	1.0816	0	0	0	0	0	0	0	0	0	1.08344
G2W53_001788	28.455	25.5831	30.1918	13.5615	15.8293	14.6973	7.84893	9.77715	9.76202	2.29157	2.26395	1.73497	0.925746	1.60275	0.894617	2.0497	2.19976	2.04744	2.09231	2.29324	2.28435
G2W53_001789	31.7189	37.5197	35.4277	23.4531	21.5028	20.4953	5.67387	6.99554	7.91813	8.57147	8.55887	7.99431	10.4098	7.99095	10.5481	3.08816	3.91645	3.03716	4.00182	4.71754	4.70709
G2W53_001790	430.488	415.377	469.191	114.496	124.071	136.691	107.115	107.106	103.533	217.271	217.835	181.569	160.012	181.364	161.791	34.3938	33.4225	34.3284	33.1849	34.4657	34.4602
G2W53_001791	0	0	0	0	0	0	0	0	0	0	0	0	0	0.0604119	0.0196703	0	0	0	0	0	0
G2W53_001792	0	0	0	0	0	0	0	0	0	0	0	0	0	0	0	0	0	0	0	0	0
G2W53_001793	0	0	0	0	0	0	0	0	0	0	0.0275435	0.0732096	0	0.0381627	0	0	0	0	0	0	0
G2W53_001794	7.74592	5.98821	5.99281	4.73386	5.5281	7.6784	7.83173	5.2569	6.38839	16.5904	16.6079	6.0764	2.31798	5.58972	2.30537	1.76195	1.30815	1.56956	1.4308	1.10926	0.808233
G2W53_001795	18.8269	7.96677	8.87823	13.6891	12.9989	21.806	13.4576	12.6269	18.088	10.2514	10.9765	1.02568	0.702114	1.36638	0.5803	0.486878	0.395139	0.538933	0.456198	0.707356	0.901942
G2W53_001796	25.6366	22.4373	21.5061	8.89439	10.7991	9.69043	12.7493	9.21108	11.284	7.48245	6.98231	7.58091	6.87738	6.91021	6.55309	2.94055	3.67058	2.7426	3.74767	4.80967	4.77727
G2W53_001797	0	0	0	0	0	0	0	0	0	0	0	0	0	0	0	0	0	0	0	0	0
G2W53_001798	43.2477	51.3329	42.2186	23.7547	19.7139	18.5311	15.7197	18.1202	22.3137	25.401	25.6074	19.2823	19.2422	19.3528	18.9724	6.83797	12.3622	6.78539	12.154	13.7229	13.7202
G2W53_001799	9.16022	9.4182	8.52778	3.67692	6.31526	3.88765	1.78938	1.51902	1.65166	1.0999	1.10586	3.40962	2.2874	3.92247	2.7539	1.73871	0.860595	1.66799	0.941285	0.944386	1.01912
G2W53_001800	0.0650605	0	0	0	0	0	0	0	0	0	0	0	0	0	0.122234	0	0	0	0	0	0
G2W53_001801	3.65128	3.40955	3.02667	2.0598	2.12709	3.08605	0.386343	0.524752	0.523026	4.01813	3.95436	7.66393	14.1293	7.99011	14.1973	3.0223	3.03684	3.32837	3.06785	2.71819	2.55819
G2W53_001802	0	0	0	0	0	0	0	0	0	0	0	0	0	0	0	0	0	0	0	0	0
G2W53_001803	2.98146	2.33419	2.93164	2.43591	1.90428	1.78615	0.0870261	0.098503	0.160656	2.89856	2.72337	2.74367	3.59642	3.04302	3.09135	0.997567	2.11397	1.14366	2.33677	2.04608	2.59599
G2W53_001804	1.58542	0.645082	1.05137	0.496881	0.263136	0.20679	0.0372787	0	0	0.200043	0.32538	0.247099	0.100153	0.225414	0.0629105	0.040602	0.118992	0.0208664	0.123641	0.15788	0.0465618
G2W53_001805	3.0123	4.46139	3.10738	5.92879	5.55953	4.08616	0.453309	0.705501	0.732237	1.93029	1.90829	1.5119	1.29675	1.47455	1.62247	2.75673	6.6512	2.83351	6.20825	8.15537	7.86669
G2W53_001806	0	0.0742822	0	0	0	0	0	0	0	0	0	0	0	0	0	0	0	0	0	0	0
G2W53_001807	0	0	0	0	0	0	0	0	0	0	0	0	0	0	0	0	0	0	0	0	0
G2W53_001808	12.4349	11.6397	11.2889	5.32683	6.79413	6.24477	10.4978	8.25066	10.3912	1.23871	1.23415	0.811958	0.795103	0.83805	0.854448	0.741795	0.800774	0.75697	0.786559	0.818203	0.765001
G2W53_001809	0	0	0	0	0	0	0	0	0	0	0	0	0	0	0	0	0	0	0	0	0
G2W53_001810	30.7037	36.4153	23.1048	0.204739	0.216849	0.23858	0.276491	0.173864	0.151236	150.872	151.536	234.573	230.571	235.936	233.002	0.213605	0.166936	0.170764	0.144549	0.158209	0.163306
G2W53_001811	0	0	0	0	0	0	0	0	0	0	0.0116923	0	0	0	0	0	0	0	0	0	0
G2W53_001812	0	0	0	0.303453	0	0	0	0.257691	0	0	0	0	0.516027	0	0	0	0	0	0	0	0
G2W53_001813	0	0	0	0.499804	0.264683	0	0.93745	0	0.461494	0	0	0	0.293873	0.944883	0.615315	0	0.698302	0	0	1.98539	2.04935
G2W53_001814	0.743778	1.63421	1.23309	1.04897	0.444407	1.22236	1.88879	0.890784	2.9057	0.333489	0.402356	0.178241	0.23118	0.222992	0.314631	0.02343	0.494398	0	0.371017	0.416491	0.429908
G2W53_001815	0	0	0	0	0	0	0	0	0	0	0	0	0	0.100993	0.131535	0	0	0	0	0	0
G2W53_001816	0	0	0	0	0.169797	0	0	0	0	0	0	0	0	0	0	0.276298	0.323898	0.283993	0.336554	0	0
G2W53_001817	0.55328	0.450241	0.611511	3.81483	10.2481	6.75468	6.37466	5.50722	7.33304	0.0969256	0.033783	0.0224485	0.320275	0.0234039	0.320057	4.69191	3.82249	4.56478	3.98981	3.08172	3.0964
G2W53_001818	28.6536	22.5999	25.3354	0	0	0	0	0	0	46.1441	50.7034	42.3866	38.0602	39.6582	29.5151	0	0	0	0	0	0
G2W53_001819	0.618361	0.323487	0.761549	0.498339	0.73894	0.622188	0.037388	0.126956	0.0920281	1.56925	1.45007	0.811416	1.24974	0.740206	1.44608	0.666636	0.820558	0.685204	0.771418	0.925789	0.802714
G2W53_001820	79.0184	85.3697	90.3264	154.91	159.9	146.364	119.548	131.131	108.926	203.086	212.84	144.659	187.206	158.896	185.902	265.71	289.593	269.621	284.88	316.424	323.697
G2W53_001821	0.376538	0.183849	0.2497	15.5772	11.774	18.7413	35.0606	39.8648	35.8927	0	0	0.163424	0	0.170379	0	63.2654	52.633	61.053	51.8112	46.7789	47.1772
G2W53_001822	9.31863	9.84052	9.42753	3.93659	4.27302	4.2535	4.0541	3.92432	4.17668	19.2397	18.9117	11.9896	14.6359	11.9651	14.3212	3.79263	6.57024	3.6817	7.18627	8.09948	7.73216
G2W53_001823	0.693813	1.10097	0.345075	0	0	0.0814458	0	0	0.0602333	0.00726028	0.00759162	0	0.0130857	0	0.00684973	0.00663114	0	0	0	0.0221015	0.0228135
G2W53_001824	0.814136	0.681446	0.154255	2.23079	3.26613	1.63835	0.0492252	0	0.0605822	0.0246853	0	0.102911	0.0667379	0.10729	0.0698683	0.676387	1.40082	0.7184	1.53794	0.876708	0.930806
G2W53_001825	4.02095	4.81666	5.0392	4.0561	3.278	3.4081	4.54303	5.22378	6.31891	3.18582	3.3398	1.66588	1.39111	1.68919	1.39438	1.61237	3.17368	1.68811	3.17893	2.93279	3.03586
G2W53_001826	0.298248	0.655302	0.395565	0.168251	0	2.2407	6.18531	3.71483	4.34992	0.0977132	0.153259	0.271571	0.0440287	0.353911	0	0.178492	0	0.183463	0	0.297456	0.307038
G2W53_001827	0	0	0	0	0	0	0	0	0	0	0	0	0	0	0	0	0	0	0	0	0
G2W53_001828	0	0	0	0	0	0	0	0	0	0	0	0	0	0	0	0	0	0	0	0	0
G2W53_001829	0	0	0	0	0	0	0	0	0	0	0	0	0	0	0	0	0	0	0	0	0
G2W53_001830	0.508835	0.521732	0.809839	0.688919	0.790474	0.668993	0.0861441	0.292514	0.212038	1.29998	0.559716	0.425058	0.826956	0.332362	0.793599	0.768274	1.06438	0.646096	1.10597	0.69836	0.961142
G2W53_001831	3.22747	4.72753	2.14029	5.46215	8.35644	4.04126	0.455333	1.54615	0	4.58089	4.78995	9.54863	1.03205	11.6142	1.08046	20.9197	20.8452	11.8263	16.5632	16.2692	17.9928
G2W53_001832	0	0	0	0	0	0	0	0	0	0	0	0	0	0	0	0	0	0	0	0	0
G2W53_001833	19.3606	19.2773	20.17	8.97513	8.94682	8.84369	10.1747	8.54633	11.3339	3.3244	3.38095	2.24661	2.23847	2.22589	2.25761	1.02189	1.07184	0.985015	1.10181	1.01037	1.07096
G2W53_001834	0.138179	0.101201	0.0916332	0.155902	0.0825618	0.129765	0.0584831	0	0	0.0867436	0.0907024	0.241083	0.117258	0.251344	0.0409192	0	0.046438	0	0	0.0440104	0.0454282
G2W53_001835	30.4294	31.061	31.6456	19.7776	18.3442	16.2221	20.3989	18.393	25.3535	10.4295	10.5335	7.91553	7.97984	8.06689	8.09908	3.11026	4.96133	3.18353	5.08131	6.35271	6.54245
G2W53_001836	0	0	0	0	0	0	0	0	0	0	0	0	0	0	0	0.504958	0	0.519022	0	0	0
G2W53_001837	0	0	0	0	0	0	0	0	0	0	0	0	0	0	0	0	0	0	0	0	0
G2W53_001838	0	0	0	0	0	0	0	0	0	0	0	0	0	0	0	0	0	0	0	0	0
G2W53_001839	0	0	0	0	0	0	0	0	0	0	0	0	0	0	0	0	0	0	0	0	0
G2W53_001840	0	0	0	0	0	0	0	0	0	0	0	0	0	0	0	0	0	0	0	0	0
G2W53_001841	0	0	0	0	0	0	0	0	0	0	0	0	0	0	0	0	0	0	0	0	0
G2W53_001842	0.542757	0.596265	1.79964	0.918559	1.45934	1.01942	1.26345	1.56007	0.706792	0.394257	0.8245	0.547872	0.253784	0.489591	0.318825	0.257209	0.482434	0.422997	0.438623	0.34291	0.471943
G2W53_001843	2.07745	2.35833	1.9976	1.23055	2.23429	2.43869	1.58267	1.24403	0.811592	0.0464698	0.0583087	0.068881	0.0642126	0.0852775	0.0643017	0.0650793	0.0928761	0.0581668	0.137864	0.116313	0.0908564
G2W53_001844	0.705007	1.97148	0	0	0.0382946	0.0300945	0	0	0	0.100784	0.105384	0.770293	0.681188	0.657063	0.665597	0.0460255	0	0	0	0.102268	0
G2W53_001845	0.343087	0.0502547	0.091007	44.4382	106.31	39.8235	0.0290417	0.0657435	0.142968	0.436121	0.445891	0.835	2.26208	0.744169	2.34989	2.67323	8.11462	2.65671	8.37777	16.1971	16.1301
G2W53_001846	19.6343	10.6328	19.8912	36.3679	38.5955	48.4994	182.497	137.934	132.822	736.008	729.513	528.046	465.076	528.365	465.59	73.8009	64.3886	74.4983	63.973	70.7736	70.8349
G2W53_001847	0	0	0	0	0	0	0	0	0	0	0	0	0	0	0	0	0	0	0	0	0
G2W53_001848	0.3191	0.186965	0.550187	228.87	264.334	251.333	37.9778	75.9752	70.7415	1.91631	1.90358	8.38834	6.08748	8.05127	6.41821	249.411	260.371	245.923	257.327	260.712	260.229
G2W53_001849	1.46786	1.96313	2.24307	413.421	445.005	422.385	567.399	442.643	440.472	7.34028	7.96131	4.49826	2.38302	4.95392	2.40877	393.342	333.553	379.729	329.238	359.094	360.204
G2W53_001850	0	0	0	22.9506	36.8868	33.0884	96.9521	65.7975	67.1001	0	0.0510518	0.0226156	0.0146663	0.0707344	0.0153542	2.54179	1.69023	2.56675	1.48469	1.55233	1.46597
G2W53_001851	0.189057	0.323081	0.250745	13.7582	22.3663	14.7954	1.14691	1.50949	0.951951	0.0835421	0.0436774	0.116093	0.150573	0.121034	0.118227	13.7727	19.7233	14.5092	19.4716	19.4976	20.607
G2W53_001852	0	0	0	0.121381	0.771363	0.47148	0.0303555	0	0.037359	0	0	0	0	0	0	0	0.806402	0.0642775	0.685563	1.11163	1.57773
G2W53_001853	0	0.122907	0	5.9169	12.4335	5.27953	0.958863	1.3265	1.52974	0	0	0.114257	0	0.11912	0	22.0783	17.6068	22.5389	17.2885	15.6852	15.9321
G2W53_001854	0	0	0	6.1176	10.0791	3.39466	0.764959	0.288614	0.941447	0	0	0	0	0	0	0.190918	0.0942357	0.196236	0.110157	0.1228	0.149803
G2W53_001855	0.649553	0.237863	0.107687	0.229021	0.14554	0.266876	0	0	0	4.60876	4.43662	9.25091	11.1415	9.00873	10.4908	0	0.46996	0.343383	0.895258	0.222696	0.306494
G2W53_001856	0.436566	0.867856	0.165433	114.661	145.367	89.7277	0.0263961	0	0.682208	0.312943	0.196335	0.347901	0.507634	0.27203	0.472395	221.172	270.868	219.928	269.475	169.445	168.283
G2W53_001857	0	0	0	0	0	0	0	0	0	0	0.0281683	0.0374351	0	0	0	0	0.0576867	0	0.0299703	0	0
G2W53_001858	0	0	0	0	0	0	0	0	0	0	0	0	0	0	0	0	0.0624429	0.0547498	0.0324414	0	0.0916275
G2W53_001859	0.69873	0.227441	0.154454	775.825	1063.72	595.633	55.5976	67.3184	67.4138	0.701786	0.564472	0.900207	0.291894	0.7821	0.152793	1210.55	1196.4	1188.62	1186.15	988.805	983.963
G2W53_001860	28.2285	27.8895	26.886	14.2146	15.9609	12.6321	1.0424	2.99505	2.17105	27.5565	25.2557	21.9149	21.0934	22.9678	19.6553	5.53406	7.90937	6.70116	7.38734	9.68571	10.3455
G2W53_001861	22.8935	20.7381	16.3803	7.1372	12.4189	8.20376	0.637466	1.87599	2.0398	56.7857	57.7505	33.15	32.7142	34.9365	32.2916	10.4204	13.6037	9.25006	15.8661	15.2606	13.5795
G2W53_001862	13.5801	17.7218	14.8183	42.5878	66.646	40.9261	0.966649	2.39526	2.89379	17.8958	17.9985	19.775	18.0704	19.4192	18.5112	32.329	36.0903	31.6439	35.6614	40.4755	41.5159
G2W53_001863	0	0	0.58753	0	0	0	0	0.848864	0	0	0	0	0	0	0	0	0	0	0	0	0
G2W53_001864	10.8443	9.04535	11.3863	15.9737	17.4585	16.6904	24.9887	21.646	18.8289	2.9063	3.1605	4.03869	2.72388	3.87374	2.96132	5.73364	5.41448	5.72963	5.1087	7.54969	8.03643
G2W53_001865	2.80081	4.27003	2.38803	0.128982	0.102458	0.402592	0	0	0	0.167715	0.116913	0.0971094	0.226713	0.161988	0.210975	0.140417	0.23943	0.18369	0.217687	0.255277	0.234223
G2W53_001866	7.92711	8.9989	7.03104	10.2854	14.8014	9.72428	9.60393	10.0635	8.98091	19.5597	18.4017	13.6263	14.2782	13.7576	14.2663	15.4608	13.0407	14.8255	13.0335	11.364	11.9463
G2W53_001867	21.7166	21.0357	22.4537	27.2684	30.5556	25.5477	13.2435	11.8578	10.5822	4.19379	4.23501	3.5925	2.9769	4.07832	2.73713	3.20073	4.67481	3.23595	4.7616	3.99321	4.42272
G2W53_001868	0.333641	0.0698159	0.0948229	95.6144	233.923	105.994	100.441	126.702	138.287	0.119178	0.124617	0.135503	0.087874	0.14127	0.0715522	9.94504	34.3255	9.81518	34.3408	94.4929	95.3127
G2W53_001869	6.0399	4.25558	4.51235	3.96799	5.25336	4.16435	6.92476	8.38738	8.64188	4.70864	4.75178	4.71725	2.96047	3.96614	3.20265	2.95043	3.4001	3.3924	3.59386	4.77798	4.93189
G2W53_001870	0.488482	0.745332	0.674866	1.87156	2.10388	1.61514	1.18879	0.955546	1.83413	0.228229	0.232365	0.17527	0.400528	0.182729	0.407982	0.592444	1.04819	0.62586	1.0357	1.23108	1.233
G2W53_001871	0	0	0	0.0635265	0	0.0264382	0	0.0269733	0.0293286	0.0700561	0.0610444	0.0649015	0.0631333	0.101496	0.0440631	0.0213285	0.0250029	0	0.129899	0.0236959	0.0244592
G2W53_001872	8.48456	8.13243	7.47685	10.2153	12.1124	11.3369	1.42195	1.99138	1.77967	2.24359	2.23664	1.3343	1.55925	1.45995	1.5696	1.71922	2.68721	1.60646	2.64414	4.05162	3.88342
G2W53_001873	0	0.180835	0.0545793	0	0	0	0	0	0	0	0	0	0	0.0331676	0	0	0	0	0	0	0
G2W53_001874	67.1077	61.1244	73.0303	13.9461	13.9568	15.8582	15.2003	13.6614	13.0799	51.9396	52.8928	37.9487	28.9377	37.285	29.0479	5.074	5.6794	4.9954	5.71515	7.16535	7.01059
G2W53_001875	0	0.125351	0	0	0	0	0	0	0	0	0	0	0	0	0	0	0	0	0	0	0
G2W53_001876	0	0	0	0	0	0	0	0	0	0	0	0	0	0	0	0	0	0	0	0	0
G2W53_001877	0	0	0.163738	0.13929	0	0	0	0	0	0	0	0	0	0	0	0	0	0	0	0	0
G2W53_001878	31.0489	28.165	28.4904	12.4664	14.0521	12.0865	5.43414	6.50564	7.65247	47.4129	47.0646	52.8046	31.2836	53.134	31.4094	13.972	17.6391	13.8549	17.3464	14.5776	14.0201
G2W53_001879	16.4735	19.6488	11.3926	3.98281	4.92146	4.08862	0	0.338219	0.245169	51.6066	52.1281	39.6865	29.8006	45.3679	32.3801	4.11856	4.02342	3.52773	4.18063	1.52524	1.57437
G2W53_001880	0	0	0	0	0	0	0	0	0	0	0	0	0	0	0	0	0	0	0	0	0
G2W53_001881	0	0.0586751	0	0.135585	0.143605	0.0752362	0	0	0	0	0	0	0	0	0	0	0	0	0	0	0
G2W53_001882	0	0	0	0	0	0	0	0	0	0	0	0	0	0	0	0	0	0	0	0	0
G2W53_001883	0.49382	0.66306	0.327476	5.20015	7.76983	6.53116	0.104503	0.0788562	0.385839	0	0.0916111	0.243499	0.78955	0.253862	0.826584	9.44244	10.9754	9.45868	10.4295	11.5574	11.7461
G2W53_001884	0	0	0	0	0	0	0	0	0	0	0	0	0	0	0	0	0	0	0	0	0
G2W53_001885	0	0	0	0	0	0	0	0	0	0	0	0	0	0	0	0	0	0	0	0	0
G2W53_001886	0	0	0	0	0	0	0	0	0	0	0	0	0	0	0	0	0	0	0	0	0
G2W53_001887	91.3189	103.353	109.868	118.494	150.474	143.929	89.073	118.046	100.011	58.2404	58.3703	49.239	58.8038	48.3379	57.6589	43.3547	37.3629	43.7553	37.0893	32.3021	32.3579
G2W53_001888	61.7227	74.1883	74.2246	77.9695	98.6387	104.974	70.6212	82.9057	76.6079	35.3584	36.559	29.3713	34.1786	26.6149	34.2908	78.6614	90.3097	79.7397	88.5641	120.466	125.588
G2W53_001889	0	0	0	0	0	0	0.0407327	0	0	0	0.0332416	0	0	0	0	0	0	0	0	0	0.033298
G2W53_001890	4.89953	6.51222	7.58126	6.19336	3.79486	3.83433	1.19045	1.95597	1.70141	5.39975	5.21186	5.07941	2.54538	5.17524	2.66477	8.57382	12.8972	8.57865	14.6026	14.9205	14.792
G2W53_001891	4.52978	4.14696	3.6047	2.81093	2.16523	1.48889	0	0.325504	0	3.20101	4.22791	3.27764	4.40295	4.14938	3.02	1.231	2.16461	1.10713	2.62406	2.05146	1.76462
G2W53_001892	1.85945	4.35789	3.45265	0.419589	0.66661	0.69849	0	0.178157	0	1.07967	0.564472	0.300069	1.07028	0.31284	1.73165	0.0986113	0.3468	0.202716	0.480467	0	0.226172
G2W53_001893	6.14756	5.90942	7.23621	0.910358	0.734632	0.829902	0.422809	0.294504	0.16011	1.30759	1.30416	1.4257	0.453223	1.39895	0.550399	0.624703	0.323085	0.623217	0.313328	0.571565	0.526766
G2W53_001894	0	0	0	0.0775952	0.452017	0.484398	0	0	0	0.0262336	0	0	0	0	0	0.119802	0.168529	0.123139	0.2043	0.133099	0.10991
G2W53_001895	0	0	0	0	0	0	0	0	0	0	0	0	0	0	0	0	0	0	0	0	0
G2W53_001896	62.7466	67.2285	60.9823	41.9182	32.0885	21.7415	19.0714	28.9725	41.0169	83.958	84.6668	53.0206	48.7474	53.8349	48.9638	34.3008	47.965	33.7303	47.2285	53.6213	53.0824
G2W53_001897	0.108356	0.634873	0.0718562	0	0	0	0	0	0	2.42227	1.44732	3.84693	2.70265	4.01066	2.17647	0	0	0	0	0	0.120815
G2W53_001898	0.502649	0.815157	0.761899	0.0202543	0.0214523	0	0.0455876	0.0171999	0.187018	2.42069	2.23531	2.83962	1.69985	2.6872	2.1355	0.17228	0.5049	0.118052	0.419702	0.191402	0.131712
G2W53_001899	0.383733	0.608925	0.721003	0.144317	0.0382133	0.0600612	0.0541372	0.0612768	0.233196	1.96206	1.50853	0.64154	1.50815	0.752449	1.47	0.158121	0.185362	0.0541751	0.192605	0.117115	0.241775
G2W53_001900	0.276358	0.202402	0.183266	0	0	0	0	0	0	0.484628	0.760118	0.673455	0.218369	0.351059	1.14306	0	0.259445	0	0.269582	0	0
G2W53_001901	0.377955	0.221449	0.200512	0.0213216	0.0903311	0.106482	0	0	0	1.03957	1.10714	1.73889	0.503119	1.70134	0.435904	0.0703323	0.0412246	0.0542184	0.0856707	0.0976738	0.141148
G2W53_001902	0	0	0	0.0164505	0.034847	0	0	0	0	0	0	0	0	0	0	0	0	0	0.0177016	0	0
G2W53_001903	0	0	0	0	0	0	0	0	0	0.0899894	0	0	0	0	0	0	0	0	0	0	0
G2W53_001904	0	0	0	13.1092	16.97	12.5279	0	0	0	0	0	0	0	0	0	2.88074	5.90981	2.59086	6.14072	6.60102	6.40072
G2W53_001905	231.252	207.042	220.658	323.135	399.566	302.473	145.931	206.47	194.566	152.048	156.672	152.485	164.96	161.113	164.805	143.816	172.281	144.819	178.738	235.175	231.928
G2W53_001906	27.5974	27.9269	23.9794	26.1329	22.3049	26.293	21.3532	20.746	24.4828	18.0988	17.8561	15.235	15.4563	14.7258	15.6904	15.037	17.8862	15.2639	18.2129	18.7424	18.8401
G2W53_001907	0	0	0	0	0	0	0	0	0	0	0	0	0	0	0	0	0	0	0	0	0
G2W53_001908	0	0	0	0	0	0	0	0	0	0	0	0	0	0	0	0	0	0	0	0	0
G2W53_001909	0	0	0	0	0	0	0	0	0	0	0	0	0	0	0	0	0	0	0	0	0
G2W53_001910	0	0	0	0	0	0	0	0	0	0	0	0	0	0	0	0	0	0	0	0	0
G2W53_001911	0	0	0	0	0	0	0	0	0	0	0	0	0	0	0	0	0	0	0	0	0
G2W53_001912	0	0.068092	0.0308272	54.5465	17.3319	139.654	215.145	225.591	471.329	0.0171968	0.0179816	0.0119486	0.0154974	0	0	33.9027	36.6501	34.1931	36.7238	86.4035	87.0165
G2W53_001913	0	0	0	0	0	0	0	0	0	0	0	0	0	0	0	0	0	0	0	0	0
G2W53_001914	0	0	0	0	0	0	0	0	0	0	0	0	0.116444	0	0	0	0	0	0	0	0.135339
G2W53_001915	0	0	0	0	0	0	0	0	0	0	0	0	0	0	0	0	0.335504	0	0	0	0
G2W53_001916	0	0	0	0	0	0	0	0	0	0	0	0	0	0	0	0	0	0	0	0	0
G2W53_001917	63.8973	54.2632	48.8303	7.29512	6.99941	11.8584	33.4831	23.1766	23.4569	6.42864	6.57347	7.25534	5.82538	7.56412	5.56248	2.40053	2.89015	2.51741	2.86478	2.39668	2.64129
G2W53_001918	0	0	0	0	0	0	0	0	0	0	0	0	0	0	0	0	0	0	0	0	0
G2W53_001919	28.0055	28.9655	29.8508	6.16539	7.67282	6.95995	4.16304	5.46468	6.08418	44.7179	45.7595	36.5017	27.4696	36.8838	28.0876	2.81984	3.46305	2.96739	3.35302	5.4203	5.44092
G2W53_001920	0	0.938801	0.070837	2.59118	18.9558	10.8842	1.13026	1.27932	1.11282	0	0	0	0	0	0	0.0280801	0.971073	0.0144311	0.889302	4.78873	4.79808
G2W53_001921	7.48021	10.5127	6.83743	26.7446	40.7684	30.3773	0.128349	0.484251	0.473883	0.615272	0.608576	0.76257	1.66342	0.698658	1.71006	3.66031	4.54017	3.80909	4.38456	5.29839	5.8
G2W53_001922	0	0	0	0.219269	0	0.0912543	0	0	0	0	0	0	0	0	0	0	0	0	0	0	0
G2W53_001923	23.9615	35.5998	17.9731	0	0	0.0189096	0	0	0	1.26908	1.40211	2.24604	2.93471	2.0641	2.94811	0.010935	0	0	0	0	0
G2W53_001924	216.54	187.392	161.218	21.413	18.2162	22.6852	38.8777	32.6145	31.777	27.0593	27.0808	24.1686	22.9213	24.2908	22.9016	14.2997	11.9066	13.9259	11.4232	10.5418	10.67
G2W53_001925	0	0.0724526	0	0	0	0	0	0.0236957	0	0	0	0.062783	0.0508938	0	0.0959058	0	0.0120934	0	0	0	0
G2W53_001926	0	0	0	0	0	0	0.0292416	0	0	0.0214586	0	0	0	0	0	0.0195991	0	0	0	0.0217745	0.022476
G2W53_001927	0	0	0	0	0	0	0	0	0	0	0	0	0	0	0	0	0	0	0	0	0
G2W53_001928	0.0708777	0.311461	0.141007	0	0.169397	0	0.779958	0.679091	0.996826	0	0	0	0	0	0	0	0.110475	0	0.0382639	0	0.0360242
G2W53_001929	22.3771	13.027	21.3078	0.485524	0.685656	0.404126	0	0	0	0	0	0	0.396309	0	0.93352	0.100414	0	0	0.122313	0.334681	0.345462
G2W53_001930	24.0984	5.84638	11.5861	0.7647	0.179985	0.141444	0	0	0	0	0	0.365248	0.78955	0.761586	0.413292	0	0.844259	0.0822494	0.682303	0.177805	0.0917666
G2W53_001931	0.856579	1.88205	0.284019	0.644297	1.02361	0.536281	0	0	0	0.0733781	0.0767269	0	0.0991906	0	0.103843	0.435627	0.235697	0.413317	0.285724	0.297834	0.307429
G2W53_001932	67.4916	59.4583	66.1706	13.8071	12.9875	13.1532	27.3338	28.3968	29.9551	29.2895	29.1822	15.9711	19.9319	16.8445	19.774	5.73681	4.50728	5.39475	4.88163	6.89341	6.90551
G2W53_001933	24.0089	23.4816	24.97	28.182	34.7941	32.8402	35.534	29.7901	29.828	7.03041	6.98622	5.58746	6.66115	5.77294	6.78051	5.79447	7.0892	5.86545	7.11172	8.70975	8.8138
G2W53_001934	355.613	367.055	371.232	446.503	489.341	492.776	437.926	423.042	377.316	198.1	197.935	167.675	153.955	169.52	155.135	116.922	115.212	115.952	116.374	138.682	138.276
G2W53_001935	21.3093	26.0656	28.7803	10.0701	12.2656	12.468	3.8248	4.32921	4.47478	7.84465	7.80772	4.52197	3.9013	4.73547	4.05688	3.07824	4.23073	3.09579	4.16977	3.90638	4.3061
G2W53_001936	0	0	0	0	0	0	0	0	0	0	0	0	0	0	0	0	0	0	0	0	0
G2W53_001937	27.9431	31.351	38.7693	52.4334	51.6272	53.786	48.1455	48.9884	46.0401	7.65806	8.4542	6.69888	7.45122	7.42601	7.36894	9.64176	11.7602	9.79574	12.2197	13.4054	13.6775
G2W53_001938	0	0	0	0	0	0	0.708296	0	1.30757	0	1.86276	0	0	0	0	0.813543	3.8148	0.836202	7.92771	1.80769	0.932961
G2W53_001939	0	0	0	0	0	0.0535773	0.482929	0.0546617	0.0594348	0	0	0	0	0	0	0	0	0	0	0.610095	0.236156
G2W53_001940	0	0	0	0	0	0.257171	0	0	0.285287	0	0	0	0	0	0	0	0	0	0	0	0
G2W53_001941	0	0.971275	0	0	0.056599	0	0	0	0	0.0228446	0	0	0	0	0	0	0.0978386	0	0	0	0
G2W53_001942	101.665	98.8978	89.806	32.6682	34.3678	37.9826	65.1754	66.4931	62.7631	78.1188	76.9959	86.8857	92.4018	86.7005	92.552	11.8842	14.662	12.7184	15.2892	15.0329	16.0787
G2W53_001943	173.745	170.585	195.836	141.712	170.343	156.851	65.5679	83.2342	69.768	115.209	120.333	77.8327	78.6442	76.5243	77.6386	63.8577	75.9519	64.3188	72.3903	69.5217	74.9685
G2W53_001944	292.16	277.357	283.362	236.029	253.719	223.068	226.529	224.951	222.965	163.976	165.148	178.367	154.95	178.146	155.987	98.5942	114.309	99.9934	115.197	132.505	130.192
G2W53_001945	0	0	0	0	0	0	0	0	0	0	0	0	0	0	0	0	0	0	0	0	0
G2W53_001946	0.422285	1.23711	0.140019	0.119112	0.084105	0.297429	0.983008	1.2138	0.806536	0.203185	0.1352	0.0256684	0.116522	0.0267608	0.104561	0.0674828	0.0593316	0.0693624	0.0616498	0.0749732	0.0773884
G2W53_001947	15.0391	18.3465	14.0219	14.3595	12.5802	15.093	24.2636	21.6138	25.6758	4.44657	4.3945	4.17964	4.77637	4.08666	4.73198	4.27657	5.70092	4.36515	5.65236	6.64021	6.6072
G2W53_001948	1.92275	4.2246	2.26678	2.28988	2.04238	1.70535	0.452104	0.409381	0	0.161291	0.0481863	0.128077	0.0830587	0.0333821	0.130432	0.862843	0.468741	0.713826	0.307614	0.701426	0.699888
G2W53_001949	13.4761	17.5914	12.4587	16.3002	19.372	16.4336	1.00653	1.87979	1.87877	2.70184	3.0302	2.30119	4.14318	2.46226	3.92638	19.085	18.3603	18.6347	18.108	19.5451	19.4445
G2W53_001950	16.0001	15.7117	13.8113	15.9344	16.7167	17.2923	9.34446	10.6196	11.64	3.03119	3.22758	1.91325	2.40146	1.88208	2.43029	2.48457	3.3287	2.28276	3.01407	2.59135	2.57016
G2W53_001951	0.162388	0.178397	0.188453	0	0	0	0	0	0	0.129386	0.11838	0.0898997	0.131176	0.0937258	0.12207	0	0	0	0	0	0
G2W53_001952	0	0	0	0	0	0	0	0	0	0	0	0	0	0	0	0.112213	0	0	0	0	0
G2W53_001953	105.247	104.121	131.184	71.1855	91.8581	85.9014	41.6685	55.259	52.3345	56.3769	56.7925	46.4601	47.4009	46.7089	47.9592	15.1887	18.6836	14.6783	18.8606	20.7085	20.881
G2W53_001954	0.0745619	0	0	0	0	0	0	0	0	0	0	0	0	0	0	0	0	0	0	0	0
G2W53_001955	1.17193	1.68484	1.29528	2.6445	2.67124	2.11962	0.624606	0.83174	1.44699	0.831689	0.917959	1.09153	0.624586	0.803287	0.653882	2.02565	2.52304	1.90857	2.67303	2.53181	2.80695
G2W53_001956	0	0	0	0.295688	0.58951	0.260593	0	0	0	0.0192513	0	0.0401283	0	0	0	0	0	0	0	0	0
G2W53_001957	16.0898	18.2519	17.5693	12.8303	17.4925	17.7799	14.0806	13.1557	11.3427	9.73561	8.57818	7.19019	6.81024	7.49621	6.68006	7.58616	10.5332	7.35006	10.1874	10.2244	10.1259
G2W53_001958	14.6942	16.2504	14.9089	14.3407	14.5744	17.3183	9.45315	10.0663	11.0984	8.42616	6.87026	3.90309	4.70074	4.2872	4.82659	4.3519	5.42386	4.14352	5.35678	7.63414	7.51233
G2W53_001959	2.88133	5.17973	3.8215	4.43305	5.94732	5.16579	3.88023	4.89389	4.36613	4.12169	5.12296	2.37751	2.73323	2.02802	2.49459	3.26733	2.9143	3.13931	3.11469	3.47216	4.96875
G2W53_001960	1.54477	2.54559	2.56103	0	0.23075	0.362677	0	0	0.201164	2.7131	2.35059	1.93896	1.11771	1.79688	1.31641	0	0.0829972	0	0	0	0
G2W53_001961	5.65803	2.91823	4.01634	0.0449559	0.047615	0.0748382	0.0337284	0.114529	0.04151	4.22581	4.40583	1.62172	1.78234	1.67294	1.47189	0	0.0789168	0	0.150334	0.0124652	0.0128668
G2W53_001962	10.9538	7.11083	8.25456	0.140441	0	0.350688	0.105366	0.357786	0.259352	12.5561	11.9172	8.58993	4.52612	7.27636	5.64965	0.176431	0	0.181345	0	0	0
G2W53_001963	3.81841	3.72876	3.28245	0.478686	0.338	0.332029	0.538704	0.406498	0.441994	1.90038	1.91859	1.54807	1.77165	1.51902	1.9784	0.658371	0.420979	0.553671	0.291619	0.332477	0.27455
G2W53_001964	4.96409	3.96617	5.61124	0.827391	1.41561	2.01306	12.1763	11.9986	11.6359	1.94935	1.74988	1.78888	1.55785	1.75845	1.63092	0.235151	0.354424	0.241701	0.368272	0.223931	0.269669
G2W53_001965	7.65421	4.34003	5.07588	0.278579	0.442586	0.231876	0.209005	0.354853	0.128613	4.15236	5.37059	3.88034	4.94157	4.00357	4.5864	0.0132144	0	0	0.0321925	0.0293624	0.0151541
G2W53_001966	15.6335	13.4047	15.6774	0.430211	0.455658	1.07426	0.806919	0	0.397235	21.0518	27.5853	35.9198	15.8496	33.5879	13.3247	0.243387	0.570635	0.250166	0.592931	0.270402	0.279113
G2W53_001967	0	0	0	0.0472475	0.0333614	0.0917617	0.0945269	0.0534965	0.130878	0.008854	0	0	0	0	0.0167067	0.105128	0.227519	0.08312	0.226558	0.0808593	0.157654
G2W53_001968	1.3989	0.887937	1.29875	0.263055	0.222891	0.131372	0.0394716	0.0446771	0	5.15567	5.54952	5.268	5.6301	5.88765	6.38059	0.0830984	0.0324715	0.0854128	0.0674805	0.092322	0.127061
G2W53_001969	0	0.302217	0	1.16393	0.986218	0.775036	0.174648	0.197681	0.214942	0	0	0	0.223434	0	0.350872	0	0.132731	0	0.137918	0	0
G2W53_001970	37.4143	34.2621	39.7403	6.45507	9.53983	6.34749	3.69415	2.72806	2.93856	49.9765	50.1135	38.2579	61.7622	38.3432	61.8708	3.62345	4.81786	3.42443	4.53216	10.645	10.458
G2W53_001971	0.920426	1.59335	0.55489	10.2904	9.79917	9.78322	1.52284	2.04435	1.56908	2.49617	2.45951	3.8023	2.98492	3.61639	2.53618	15.9591	22.1521	16.3135	22.0564	27.7648	27.8547
G2W53_001972	0	0	0	0.45928	0.972891	0.764563	0	0	0	2.59996	3.62483	0	2.34304	0	4.08824	25.3298	12.063	21.1537	12.5343	30.7796	28.1401
G2W53_001973	0	0	0	0	0	0	0	0	0	0.0391211	0	0	0	0	0	0	0	0	0	0	0
G2W53_001974	26.5393	25.6087	29.8677	15.4634	16.2623	14.9176	31.3609	26.7269	26.8913	14.3799	14.4874	11.7417	9.97934	10.8348	10.4474	5.27272	8.31639	5.44421	8.52456	10.6509	10.4168
G2W53_001975	74.8911	80.8256	79.8121	27.4478	26.1683	30.0813	14.3356	15.2952	15.9439	61.4138	62.5222	58.9967	45.1716	59.7078	45.6597	36.0627	41.3502	36.0022	41.5237	43.2993	45.4296
G2W53_001976	40.4778	44.8131	37.4551	23.3658	20.2483	20.3326	24.3034	18.4893	15.2004	30.0621	27.2428	13.9251	12.6427	15.9695	10.3995	22.8809	41.8436	20.696	20.067	45.7571	35.6857
G2W53_001977	86.2614	71.1995	74.4561	26.2624	16.3623	23.1454	22.6011	30.1733	40.6534	470.791	455.699	303.82	256.137	320.974	202.145	41.2688	34.3332	38.3133	47.0257	34.0174	39.6932
G2W53_001978	34.5141	32.546	32.9051	10.9986	7.50374	7.54644	10.4448	10.1814	12.5343	247.181	254.649	158.624	120.224	155.488	125.334	15.028	19.0184	13.8668	19.8655	21.2496	21.7383
G2W53_001979	1041.89	1165.41	1276.89	15.8008	14.2093	10.1741	2.4604	2.5317	0.412915	262.919	267.828	530.2	859.756	529.581	871.507	8.75324	8.71237	6.87509	10.2598	9.81656	9.3752
G2W53_001980	23.1642	17.1747	14.8556	2.9577	3.24656	3.67039	0.282422	0.365334	0.446889	16.2263	16.1392	20.3487	28.2521	19.208	28.7772	1.05859	1.36203	1.06153	1.47815	1.9219	1.77655
G2W53_001981	50.4079	55.1546	46.3417	11.7008	8.27203	8.35806	19.4674	19.8483	20.789	27.6062	27.2844	28.3778	31.3534	28.8028	31.5329	5.19742	5.37942	5.37599	5.04868	6.08496	5.92261
G2W53_001982	47.1564	53.1573	49.5784	34.6967	36.6988	40.8967	22.5865	22.3093	26.3116	3.72638	3.86826	3.41787	2.76911	3.39737	2.65741	2.59107	3.5425	2.62529	3.41853	3.78125	3.92424
G2W53_001983	321.797	292.89	287.448	79.8101	76.7108	75.8433	66.0767	83.5487	74.1795	129.967	127.319	127.65	134.048	127.747	135.141	22.1155	25.1447	22.4576	24.8289	29.9358	30.4418
G2W53_001984	0	0	0	0	0	0	0	0	0	0	0	0	0.103452	0	0.108304	0	0	0	0	0	0
G2W53_001985	0	0	0	0	0	0	0	0	0	0	0	0	0	0.0632926	0	0	0	0	0	0	0
G2W53_001986	132.849	147.468	137.566	31.1919	30.0428	32.5937	4.31404	5.18305	6.19919	82.897	83.5104	90.2013	107.339	89.7815	107.33	13.7097	17.6453	13.1084	17.6193	23.8445	24.4587
G2W53_001987	5.70752	6.42502	7.2895	3.27942	2.90502	2.53111	1.4315	1.16458	1.92694	6.72485	6.73253	7.42303	6.10329	7.53166	5.71462	1.74244	2.70648	1.70142	2.70611	2.5166	2.59767
G2W53_001988	0	0	0	0	0	0	0	0	0	0	0	0	0	0.117711	0	0.0742083	0	0.0762752	0	0	0
G2W53_001989	5.8378	4.27555	4.80044	2.85418	2.13935	1.60815	4.97454	4.84752	5.75734	2.36379	2.57297	1.77703	1.92068	1.99301	2.17529	0.69016	1.59738	0.472922	1.53045	1.82844	1.7047
G2W53_001990	4.23784	3.4393	3.03818	1.29227	1.09496	0.914278	2.18144	1.53635	2.92338	0.748158	0.706596	0.201225	0.500233	0.244755	0.660313	0.0881713	0.310084	0.113284	0.29535	0.48979	0.505568
G2W53_001991	0.289644	0.212133	0.384154	0.245096	0.0865311	0	0	0	0	1.27221	1.33027	0.407978	0.0881918	0	0.0923285	0.178764	0.419123	0.275615	0.108875	0.397213	0.820018
G2W53_001992	10.4332	9.93931	8.32334	3.40752	3.51533	2.2469	0.929638	1.35288	1.7979	0.792009	0.68659	0.592632	0.732046	0.539397	0.772769	0.247309	0.318907	0.209713	0.316305	0.425877	0.340333
G2W53_001993	0.358607	0	0	0	0	0.168386	0	0	0	0	0	0	0	0	0	0	0	0	0	0.863851	0.594453
G2W53_001994	0.709419	0.399671	0.325696	0.030785	0.16303	0.0256239	0	0	0	0.0325404	0.0291647	0.0904383	0.0335141	0.0606133	0.0350861	0	0.00497727	0.00436406	0.00517174	0.0377366	0.0584284
G2W53_001995	0	0	0	0	0	0	0	0	0	0	0	0	0	0	0	0	0.087436	0	0	0	0
G2W53_001996	0	0	0	0	0.685656	0	0	0	0	0	0	0	0	0	0	0	0	0	0	0	0
[truncated: 43,272 more rows]

## Sheet: Supplementary Table S8
Supplementary Table S8. Modeling features of seven chalcone synthase-like (CHS-L) proteins in Senna tora.
						Ramachandran plot statistics (in %)
Gene name	Template gene	PDB ID	Sequence identity (%)	Similarity	GMQEa	MFRb	AARc	GARd	DRe
CHS-L2 (G2W53_022815)	Type III polyketide synthase of Oryza sativa[1]	4yjy	55.79	0.47	0.83	92.9	6.4	0.6	0
CHS-L3 (G2W53_022816)			56.05	0.47	0.82	92.4	6.4	0.9	0
CHS-L5 (G2W53_022821)			55.44	0.46	0.83	94.1	5.6	0.3	0
CHS-L9 (G2W53_022825)			55.09	0.46	0.83	92.5	6.6	0.9	0
CHS-L10 (G2W53_022826)			55.97	0.47	0.82	93.2	5.8	0.3	0.6
CHS-L13 (G2W53_022831)			55.97	0.47	0.83	93.2	5.8	0.3	0.6
CHS-L6 (G2W53_022822)	Chalcone synthase 2 of Medicago sativa G256A mutant[2]	1i86	53.25	0.46	0.82	92.3	7.1	0.3	0.3
aGlobal Model Quality Estimate
bMost favored regions
cAdditional allowed regions
dGenerously allowed regions
eDisallowed regions
[1] Go, M.K.; Wongsantichon, J.; Cheung, V.W.N.; Chow, J.Y.; Robinson, R.C.; Yew, W.S. Synthetic polyketide enzymology: Platform for biosynthesis of antimicrobial polyketides. ACS Catal. 2015, 5, 4033–4042. https://doi.org/10.1021/acscatal.5b00477.
[2] Jez, J.M.; Bowman, M.E.; Noel, J.P. Structure-guided programming of polyketide chain-length determination in chalcone synthase. Biochemistry 2001, 40, 14829–14838. https://doi.org/10.1021/bi015621z.
Note: CHS-Ls, chalcone synthase-like genes.

## Sheet: Supplementary Table S9
Supplementary Table S9. Expression levels and expression stability values of 42 commonly used reference genes in Senna tora and Senna obtusifolia.
			TPM (Senna tora)									TPM (Senna obtusifolia)												Stability value
Gene ID	Gene name	Annotation	Leaf-1	Leaf-2	Leaf-3	Young Seed-1	Young Seed-2	Young Seed-3	Mature Seed-1	Mature Seed-2	Mature Seed-3	Leaf-1	Leaf-2	Leaf-3	Leaf-4	Leaf-5	Leaf-6	Seed-1	Seed-2	Seed-3	Seed-4	Seed-5	Seed-6	Genorm	Normfinder
			SRR7778020	SRR7778021	SRR7778013	SRR7778010	SRR7778009	SRR7778015	SRR7778016	SRR7778024	SRR7778025	SRR7124549	SRR7126111	SRR7130744	SRR7130745	SRR7130794	SRR7130795	SRR7124545	SRR7136876	SRR7136877	SRR7137033	SRR7137034	SRR7137909
G2W53_013008	PTB	Polypyrimidine tract-binding protein-like protein 2 isoform X1	42.5784	44.6194	42.3761	26.1583	27.382	27.1128	30.1686	26.1698	28.9134	28.9328	29.2919	20.4419	21.8634	19.2188	22.287	10.0596	14.7257	9.68801	14.6122	15.5933	15.2309	1.015	0.097
G2W53_005440	Tubulin-α	Tubulin alpha-3 chain	176.052	208.999	171.572	334.051	376.808	301.968	55.5304	65.1947	64.5763	172.794	173.69	164.649	172.455	166.037	170.888	183.49	201.669	182.324	200.09	232.71	235.711	1.065	0.136
G2W53_013397	Actin	Actin-related protein 5	9.58271	10.1002	8.64799	10.3417	8.88722	7.41457	1.34018	1.95603	1.99661	5.17797	4.94782	3.27671	5.49905	3.02377	5.63673	3.91439	5.79991	3.94862	5.99108	6.32122	6.34129	1.066	0.137
G2W53_022713	Actin	Actin-related protein 7	55.7596	46.94	56.1029	43.3873	45.1877	46.3455	22.786	27.9403	25.3723	63.4502	63.4923	56.8854	59.0247	54.3643	62.437	52.9669	57.709	67.252	61.4819	88.6152	94.3283	1.07	0.137
G2W53_042565	UBC	Putative ubiquitin-conjugating enzyme E2 24	21.3204	21.7922	25.5027	11.9709	13.7788	10.9069	9.50533	10.3901	12.3957	29.586	29.9637	20.0644	20.9347	20.2125	20.684	17.3136	19.9645	17.2761	20.2764	23.8195	24.0998	1.074	0.139
G2W53_022684	EF2	Elongation factor 2	90.9401	109.002	105.513	92.8392	98.096	91.9219	48.1423	53.2773	55.0665	210.658	210.776	108.982	134.774	105.914	139.168	87.211	86.8516	85.4077	84.5079	118.218	120.022	1.075	0.139
G2W53_041822	Actin	Actin-related protein 3	10.041	8.38007	8.36206	11.3948	12.4176	13.1576	3.31087	3.57971	3.5882	3.54031	4.18057	2.45986	1.78776	2.34347	1.67006	3.20565	4.64021	3.18033	5.02524	4.49054	4.41144	1.076	0.14
G2W53_030688	PTB	Polypyrimidine tract-binding protein-like protein 2-like isoform X4	33.8764	35.313	29.9321	20.3051	18.056	19.748	25.5801	24.8042	28.073	16.3972	16.4155	12.1443	9.68212	12.0411	9.86002	6.13043	9.76699	6.51263	10.2489	9.55353	9.46023	1.077	0.143
G2W53_038994	UBC	Ubiquitin-conjugating enzyme E2 32	66.0561	59.9008	70.8349	50.7279	54.85	58.5923	117.165	88.9393	98.9404	54.6468	54.7391	49.0785	43.9511	47.7964	44.2678	36.3711	35.9301	35.6759	36.3716	37.8959	38.773	1.081	0.146
G2W53_025560	EF1-α	Elongation factor 1-alpha-like	438.83	476.565	441.252	358.98	487.322	439.359	414.963	407.177	370.289	729.233	709.45	746.377	828.866	744.053	825.432	809.194	717.336	809.831	703.45	795.342	794.773	1.138	0.147
G2W53_025760	UBQ	Polyubiquitin	471.067	464.839	360.837	224.366	259.692	335.245	246.163	274.137	234.266	602.123	588.876	769.656	572.428	743.187	554.215	401.209	387.552	384.171	379.347	361.244	353.187	1.146	0.153
G2W53_006605	UBQ	Polyubiquitin 8 isoform X1	42.8488	48.0169	54.8005	27.7164	31.6658	30.7849	18.749	23.7682	22.7391	13.8637	14.0536	10.6945	9.6067	10.2427	9.39724	4.92704	7.68801	4.54574	7.80405	8.78069	9.10213	1.157	0.162
G2W53_041823	Actin	Actin-related protein 3	7.29904	8.57017	7.14527	10.915	10.5222	11.0979	2.15758	3.60767	2.59501	15.4204	16.5513	7.80514	5.88994	7.54552	6.93699	9.04743	12.6836	9.10768	12.7247	13.9894	15.2958	1.169	0.162
G2W53_033590	PTB	Polypyrimidine tract-binding protein-like protein 3-like	62.3492	69.0674	69.4212	40.7993	45.0367	43.8987	39.7411	41.277	44.2452	16.2336	16.3098	13.8342	11.6507	13.4596	11.8742	7.71712	11.4025	7.41795	11.2932	11.7095	11.9125	1.207	0.167
G2W53_021011	UBQ	Polyubiquitin-like isoform X1	775.166	684.407	799.675	214.656	251.693	267.217	218.641	170.099	176.085	569.973	567.898	334.085	692.86	334.926	694.472	191.442	177.328	184.008	205.083	174.617	169.516	1.21	0.17
G2W53_025555	EF1-α	Elongation factor 1-alpha-like	92.0463	97.8287	99.0793	113.768	126.551	114.447	62.7244	66.8504	60.3169	233.798	221.282	204.152	235.084	202.359	240.17	185.576	179.03	172.318	177.082	214.264	213.308	1.215	0.176
G2W53_008919	UBC	Ubiquitin-conjugating enzyme E2 27	23.9439	23.5326	23.0493	33.8124	39.4121	41.7804	35.8942	40.2579	37.5774	7.13975	6.77797	10.7049	8.16976	10.6841	8.28707	16.8604	13.6796	14.8606	14.5277	13.2505	12.7426	1.218	0.177
G2W53_025557	EF1-α	Elongation factor 1-alpha-like	124.316	141.019	133.693	225.796	297.276	238.439	185.618	184.771	185.948	274.374	277.496	277.15	332.08	282.434	333.036	388.458	353.029	393.61	343.014	457.511	456.792	1.219	0.189
G2W53_006911	UBC	Ubiquitin-conjugating enzyme E2 2	258.648	246.03	288.868	140.395	152.186	158.106	69.8876	75.2512	73.4427	71.7181	70.4956	51.3761	47.9139	50.7973	47.9933	21.4452	25.4175	21.4858	24.2046	26.0821	25.7383	1.263	0.191
G2W53_025573	UBC	Putative ubiquitin-conjugating enzyme E2 C	42.2971	35.8933	38.1925	20.6033	24.6197	23.3053	6.01134	8.00044	7.07305	25.9184	26.5514	19.9399	31.4138	20.462	31.0799	6.55282	7.84261	5.92427	7.56398	5.9461	6.13765	1.273	0.193
G2W53_020780	UBC	Ubiquitin-conjugating enzyme E2 35	335.872	302.72	313.624	202.099	246.451	238.131	90.9755	97.3041	96.05	59.9991	60.2662	50.9223	56.7761	50.7533	58.285	29.9393	30.5129	30.4339	30.7772	30.9773	29.2669	1.287	0.198
G2W53_032079	Tubulin-α	Tubulin alpha chain	540.905	782.355	533.816	429.728	521.565	522.344	155.625	131.21	121.774	225.161	225.232	264.455	192.545	269.904	192.534	811.456	1013.76	794.301	995.983	1086.68	1100.69	1.332	0.208
G2W53_035906	UBC	Ubiquitin-conjugating enzyme E2 2	725.184	716.056	807.673	351.406	347.971	397.79	419.626	368.072	363.987	159.629	160.524	149.221	131.949	152.181	132.029	66.7937	69.279	63.8932	69.3819	69.2463	68.1266	1.341	0.211
G2W53_007232	Actin	Actin-related protein 6	14.1309	18.0735	14.0792	7.46618	9.47288	7.92993	16.1044	11.0294	13.2133	2.32849	2.29154	2.22061	1.71438	2.24897	1.66556	2.40472	3.29155	2.37169	3.26778	4.61745	4.70244	1.346	0.221
G2W53_008344	Actin	Actin-related protein 3	15.4477	17.5363	15.9249	17.033	21.4807	17.2107	8.52927	8.07311	8.70491	2.53496	2.67208	2.46871	1.7857	2.3263	1.84367	1.89093	2.19475	1.91152	2.22729	2.66935	2.64084	1.375	0.225
G2W53_043585	UBQ	Polyubiquitin-A isoform X2	139.327	144.531	128.125	145.499	191.513	205.263	106.105	118.275	103.169	570.416	541.734	473.562	450.713	449.791	430.396	406.453	346.025	387.014	328.145	386.562	368.135	1.387	0.232
G2W53_043024	Tubulin-β	Tubulin beta chain	415.523	409.748	394.024	124.77	164.765	130.274	11.2091	17.5299	17.3757	105.129	105.552	64.7883	60.5517	64.4384	60.141	67.9844	79.0943	65.5539	78.6251	102.396	101.349	1.389	0.243
G2W53_021739	UBC	Ubiquitin-conjugating enzyme E2 7	313.279	350.342	478.226	271.554	267.457	366.057	1634.46	1177.83	992.285	493.894	481.363	465.066	370.685	514.762	363.036	880.31	721.392	867.459	724.155	755.115	779.054	1.397	0.253
G2W53_038983	UBC	Putative ubiquitin-conjugating enzyme E2 38	6.02461	5.51546	5.52278	4.04841	2.54096	6.32339	11.9619	10.9503	10.0144	16.5047	16.8634	5.76662	4.07965	6.28533	3.64815	14.4715	13.7333	14.3433	14.1649	13.5896	15.0152	1.432	0.261
G2W53_031616	Tubulin-β	Tubulin beta chain	13.4919	18.1484	15.3253	58.4028	85.1635	65.9864	12.9755	14.5267	14.4383	9.37977	9.4731	21.9317	13.0399	21.9839	12.8361	54.8228	62.1768	54.6367	63.2884	99.3043	99.1838	1.508	0.315
G2W53_024732	Tubulin-α	Tubulin alpha-3 chain	801.42	910.69	844.032	84.246	97.7462	92.5701	36.2274	36.3988	32.2922	46.1131	44.4125	46.7091	35.5232	47.2483	35.7217	38.0831	36.2863	37.1358	35.0463	40.3089	41.3455	1.551	0.317
G2W53_008555	Actin	Actin-7	22.8987	30.6125	21.3876	85.367	130.576	90.5909	3.16685	6.58188	5.34226	67.3996	66.0708	54.3939	58.1834	53.174	58.2171	46.6836	39.6101	46.1044	39.3249	44.5225	44.7554	1.567	0.345
G2W53_024846	Actin	Actin-related protein 2	61.6805	60.7576	57.8671	51.1149	45.4247	54.557	2.0237	4.12306	3.7359	4.89441	5.0085	4.45361	4.36367	4.46651	4.37115	3.7385	7.70212	3.92438	7.92556	8.66041	9.04886	1.572	0.357
G2W53_017237	UBC	Ubiquitin-conjugating enzyme E2 5	101.213	97.7023	117.859	60.8847	61.8633	69.9138	52.6729	57.8877	59.3112	14.9568	15.3155	8.60961	7.65208	9.16016	7.56886	6.2899	7.26295	6.26375	7.43186	7.67316	7.83715	1.599	0.381
G2W53_017617	Actin	Actin-related protein 4	38.088	37.4568	43.3674	42.0273	41.1496	41.8427	39.9462	41.1404	42.362	6.26019	6.31701	4.58964	4.48871	4.87659	4.39637	3.46528	4.30706	3.43394	4.23183	4.98515	5.20688	1.622	0.388
G2W53_030700	UBC	Ubiquitin-conjugating enzyme E2 10	578.605	526.374	535.465	100.591	141.33	119.8	23.3595	29.733	27.3799	222.161	219.607	284.301	183.409	282.493	178.786	36.5089	42.3092	35.4755	43.1713	46.9006	46.5495	1.623	0.393
G2W53_032828	EF1-α	Elongation factor 1-alpha-like	261.379	215.017	258.932	46.8547	53.8752	54.278	29.1332	34.3251	32.1154	517.489	514.905	253.396	247.089	253.165	243.646	72.2829	58.1895	73.6134	56.0497	62.259	61.6331	1.632	0.409
G2W53_009041	Actin	Actin-7	216.473	236.031	224.826	357.559	474.371	367.484	29.6553	45.3875	40.1082	563.93	562.415	625.677	827.266	626.88	828.844	614.617	581.969	601.384	582.32	662.016	656.597	1.707	0.444
G2W53_034164	Tubulin-β	Tubulin beta-1 chain	19.4993	30.2858	18.8167	41.8385	83.5644	47.4217	5.29324	3.63988	3.11714	9.10812	9.22925	12.3307	4.86562	11.4952	5.22672	59.5614	56.0993	58.3995	55.2096	77.7015	77.4508	1.721	0.516
G2W53_008917	UBC	Ubiquitin-conjugating enzyme E2 27	40.473	53.9666	35.752	102.919	102.637	102.275	1.30762	5.92028	4.18421	2.60118	3.00126	4.48719	7.63865	4.93806	7.70075	48.2118	69.1946	46.439	71.4492	76.4993	75.2058	2.081	0.555
G2W53_003105	Tubulin-α	Tubulin alpha chain	75.6423	147.678	68.0171	792.435	1103.55	867.524	60.0635	77.1062	66.9473	71.068	70.375	64.3308	101.776	63.3099	100.838	1382.48	1610.36	1363.72	1602.36	1653.99	1651.59	2.243	0.671
G2W53_024602	Tubulin-β	Tubulin beta-6 chain	102.201	130.029	91.3129	67.0353	89.8395	67.0884	2.43618	2.26724	2.6651	1.1402	1.05976	1.7605	2.77812	1.77425	2.62954	36.2559	52.0424	36.1953	53.606	53.6069	52.7684	2.491	1.213

## Sheet: Supplementary Table S10
Supplementary Table S10. Coding sequences and primers used for qRT-PCR to assess relative expression levels of CHS-L genes in Senna.
Gene ID in Senna tora[1]	Gene ID in Senna obtusifolia[2]	Gene name	Forward primer sequence (5′-3′)	Revers primer sequence (5′-3′)	Coding sequence
G2W53_022815	SRR7141614.209120	CHS-L2	CATTTACCTTCAATCCGAGTT	TCAACAAGAAAATGGCGCTT	ATGGAGAGTGCTGGAGAAAAGAAAGGATTCGCCACAGTGCTTGCTATTGGCACTGCAAATCCTCCAAACATTTACCTTCAATCCGAGTTTCCTGATTTCTTCTTCAGAGTCACCAATAGTGAGCATCATGTTCAACTCAAGCAGAAGTTCAAGCGCATGTGTGACAACTCCAATATCAGGAAGCGCCATTTTCTTGTTGACGAAGATATCCTTAAAGAGCATCCAAACATCAGCACCTATGGAGCTCCATCTTTGGATACACGCAGAGAAATAGTGACTAAGTACATTCCTAAGCTTGGCAAGGAAGCAGCCTTGAAATGTATTAAAGAATGGGGTCAACCTTTGTCTAAGATCACACATCTCATCTTCTGTACATCTTCATGCATCAACAGTATTCCT…
G2W53_022821	SRR7141614.201097	CHS-L5	GATACGCCACAGTGCTTGCT	ACAAGAAAATGGCGCTTCCT	ATGGTGAGTGCCACACAAACCAAGCGTGAGGGGAAGGGATACGCCACAGTGCTTGCTATTGGTACTGCAAATTCTCCAAACATTTATCTTCAATCCGAGTTCCCTGATTTCTTCTTCAGAGTCACCAATAGTGAGCATCATGTTCAACTCAAGCAGAAGTTCAAGCGCATGTGTGACAACTCCAACATCAGGAAGCGCCATTTTCTTGTCGACGAAGATATTCTCAAAGAGCATCCAAACATCAGCACCTACGGAGCTCCATCTATGGACACACGCCGAGAAATAGTGAATGACTACATTCCCAAGCTCGGGAAGAAAGCCGCCTTGAAATGTATCAAAGAATGGGGCCAACCTTTATCCAACATCACACACCTCATCTTCTGCACATCTTCATGCATC…
G2W53_022822	SRR7141614.206780	CHS-L6	ACACTGAACATCACGTCGAAC	CTATCTCCCGGCGTGTGTCC	ATGGTGAGTGCTGCACTAAACAACCATGAAGGAAAGGGATACGCCACAGTGCTAGCTATTGGCACTGCAAATCCTCCAAACATTTATCTTCAATCCGAATTCCCCGACTTCTACTTCAGAGTCACCAACACTGAACATCACGTCGAACTCAAGGAGAAATTCAAGCGCATGTGTGACAACTCTAATATTAGGAAACGCCATTTTTATGTGGACGAAGATCTTCTCAAACAGCATCCCAATCTATGCGATGGAGCTCCGTCTTTGGACACACGCCGGGAGATAGTGAATGACATCATTCCGAAACTTGGGAAGGAAGCAGCCTTGAAAGCTCTTAAAGAGTGGGGCCAGCCTTTGTCAAAGATCACGCACATCATCTTCTGCACGTCTTCATGCGTCAAT…
G2W53_022825	SRR7141614.208237	CHS-L9	ATTCGCCACAGTGCTTGCT	CATCAACAAGAAAATGGCGCTTC	ATGGAGAGTGCTGCAGAAAAGAAGGGATTCGCCACAGTGCTTGCTATTGGCACTGCAAATCCCCCAAACATTTATCTTCAATCTGAGTTTCCTGATTTCTTCTTCAGAGTCACCAATAGTGAGCATCATGTCCAACTCAAGCAGAAGTTCAAGCGCATGTGTGACAACTCCAATATCAGGAAGCGCCATTTTCTTGTTGATGAAGATATTCTTAAAGAGCATCCAAACATCAGCACCTATGGAGCTCCTTCGTTGGATACACGCAGAGAAATAGTAACTAAGTACATTCCTAAGCTTGGGAAGGAAGCAGCCTTGAAATGTATTAAAGAATGGGGCCAACCTTTATCTAAGATCACACATCTCATCTTCTGCACATCTTCATGCATCAACAGCATTCCT…
G2W53_022826	SRR7141614.208336	CHS-L10	ATTCGCCAAAGTGCTTGCTA	CGACAAGAAAATGGCGCTTCC	ATGGAGACTGAGGGAAAGGGATTCGCCAAAGTGCTTGCTATTGGCACTGCAAATCCTCCAAACATTTATCTTCAATCCGAGTTTCCTGATTTCTTCTTCAGAGTCACCAATAGTGAGCATCATGTCCAACTCAAGCAGAAGTTCAAGCGCATGTGTGACAACTCCAATATCAGGAAGCGCCATTTTCTTGTCGACGAAGATATTCTTAAAGAGCATCCAAACATCAGCACCTATGGAGCTCCATCGTTGGATACACGCAGAGAAATAGTGACTAAGTACATTCCTAAGCTTGGGAAGGAAGCAGCCTTGAAATGTATTAAAGAATGGGGTCAACCTTTATCTAAAATCACACATCTCATCTTCTGCACATCTTCATGCATCAATAGTATTCCTGGACCT…
G2W53_022831	SRR7141614.208319	CHS-L13	TCGCCAAAGTGCTTGCTAT	ATCAACAAGAAAATGGCGCTT	ATGGAGACTGAGGGAAAAGGATTCGCCAAAGTGCTTGCTATTGGCACTGCAAATCCTCCAAACATTTATCTTCAATCCGAGTTTCCTGATTTCTTCTTCAGAGTCACCAATAGTGAGCATCATGTTCAACTCAAGCAGAAGTTCAAGCGCATGTGTGACAACTCCAATATCAGGAAGCGCCATTTTCTTGTTGATGAAGATATTCTCAAAGAGCATCCAAACATCAGCACCTATGGAGCTCCATCTTTGGATACACGCAGAGAAATAGTGACTAAGTACATTCCTAAGCTTGGGAAGGAAGCAGCCTTGAAATGTATTAAAGAATGGGGTCAACCTTTATCCAAGATCACACATCTCATCTTCTGTACATCTTCGTGCATCAATAGTATTCCTGGACCT…
G2W53_013008	SRR7141614.145715	PTB	ATCGGTATCTAGTCAACCACA	ACAACTTTACCAAACGGCTT	ATGGCATCGGTATCTAGTCAACCACAATTCCGTTACACACAGCCGCCGTCAAAGGTACTTCATTTGAGAAATTTGCCATGGGAGTGCACGGAGGAGGAACTGATTGAGCTTGGGAAGCCGTTTGGTAAAGTTGTGAACACAAAGTGCAATGTTGGAGCAAATAGGAATCAAGCCTTTATTGAATTTGCAGATTTAAATCAAGCCATCGCAATGATATCATACTATGCATCATCCTCTGAGCCAGCCCAAGTACGGGGGAAAACTGTGTATCTACAATATTCCAATAGGCAAGAAATAGTAAATAACAAAACTGCAGCAGACGTTGCTGGAAATGTACTGTTGGTAACAATTGAGGGTGCAGATGCACGCCTTGTCAGCATTGATGTTTTGCACTTGGTT…
[1] Kang, S.H.; Pandey, R.P.; Lee, C.M.; Sim, J.S.; Jeong, J.T.; Choi, B.S.; Jung, M.; Ginzburg, D.; Zhai, K.; Won, S.Y.; et al. Genome enabled discovery of anthraquinone biosynthesis in Senna tora. Nat. Commun. 2020, 11, 5875. https://doi.org/10.1038/s41467-020-19681-1.
[2] Deng, Y.; Zheng, H.; Yan, Z.; Liao, D.; Li, C.; Zhou, J.; Liao, H. Full-length transcriptome survey and expression analysis of Cassia obtusifolia to discover putative genes related to aurantio-obtusin biosynthesis, seed formation and development, and stress response. Int. J. Mol. Sci. 2018, 19, 2476. https://doi.org/10.3390/ijms19092476.
